# Supplementary material for: Identification of Branched and Linear Forms of PFOA and Potential Precursors: A User-Friendly SMILES Structure-based Approach
Source: Front Environ Sci. Author manuscript; Available in PMC 2023 Mar 24. (PMC9048161; doi:10.3389/fenvs.2022.865488)
Supplement: Supplement1 [file NIHMS1796430-supplement-Supplement1.xlsx]

## Sheet: Table Index
S1.2021-Indicative-List
SOURCE DOCUMENT: 2021 Indicative List mapped to DSSTox substances
UNEP/POPS/POPRC.16 Follow-up. Draft updated indicative list of substances covered by the listing of perfluorooctanoic acid (PFOA), its salts and PFOA-related compounds. Call for information and follow-up to the sixteenth meeting of the Persistent Organic Pollutants Review Committee. 2021. UNEP-POPS-POPRC16CO-Re.LIST-PFOA-20210716.En.docx
http://chm.pops.int/TheConvention/POPsReviewCommittee/Meetings/POPRC16/POPRC16Followup/tabid/8748/Default.aspx
2021 PFOA Indicative List SORT	Ordering of records in original source document.
CAS No.	Source Chemical Abstracts Service number (CASRN)
Category	Source-assigned PFOA category
Acronym	Source-assigned Acronym
Designation	Source-assigned chemical name
2021 PFOA Indicative List Status	Designation added to indicate whether chemical was listed in Source Table 1 (YES) or 2 (NO)
PFOA	Source-indication of whether chemical is a branched, linear or anionic form of PFOA
PFOA salts	Source-indication of whether chemical is a salt form of PFOA
DTXSID	DSSTox unique substance identifier (DTXSID)
DTXCID	DSSTox unique structure identifier (DTXCID); if no DTXCID assigned, entry may be "Markush"
Substance_Name	DSSTox "Preferred name", uniquely assigned to the DTXSID substance
Substance_CASRN	DSSTox uniquely assigned CASRN to the DTXSID substance
Substance_Type	DSSTox designation of substance type (e.g., Single compound, mixture of stereoisomers, etc)
SMILES	SMILES string computed from the DSSTox structure using ChemAxon Jchem
Footnotes to S1:	Communicated by EPA to the Secretariat for correction in the next update to the Indicative List.
a)	Original Source entry with CASRN 40143-34-5, Acronym C6/C8-PFPIA, Bis(perfluorooctyl) phosphinic acid, was erroneously listed in Table 1 (second line of page 8) and was deleted in the current listing. CASRN 40143-34-5 is an invalid CAS (check sum fails). Additionally, the acronym and name provided for this substance did not match. The name as given, Bis(perfluorooctyl) phosphinic acid, would be C…
b)	Original Source entry with CASRN 80475-34-9 listed in Table 1 (sixth line of page 26) was found to not fall within the listing definition (there are only 6 perfluoro C’s so it does not satisfy the perfluoroheptyl C7F15-C requirement); hence, this chemical was relocated to end of the listing (to correspond to Table 2) and the Indicative List Status was changed from "YES" to "NO" for present purpos…
S2.PFASSTRUCT+
DTXSID	same as for S1
Substance_Name	same as for S1
Substance_CASRN	same as for S1
SMILES	same as for S1
PFASSTRUCTv4	indicator [1=yes, 0=no] of whether structure is member of EPA Dashboard PFASSTRUCT_v4 list	https://comptox.epa.gov/dashboard/chemical_lists/PFASSTRUCTV4
OECD_2018	indicator [1=yes, 0=no] of whether structure is member of EPA Dashboard PFASOECD list	https://comptox.epa.gov/dashboard/chemical_lists/PFASOECD
2021 PFOA Indicative List SORT	same as for S1
2021 PFOA Indicative List Status	same as for S1
S3.SMILES_InRule
DTXSID	same as for S1
Substance_Name	same as for S1
Substance_CASRN	same as for S1
Structure_SMILES	same as for S1
PFASSTRUCTv4	same as for S2
OECD_2018	same as for S2
2021 PFOA Indicative List SORT	same as for S1
2021 PFOA Indicative List Status	same as for S1
Prepare-SMILES	initial P1-P7 transformations applied to prepare SMILES for QT-SMILES transformations
QT-SMILES	QT-SMILES transformations, QT-1:QT-11, applied to recognize and eliminate branching in C7F15 moiety
7T-SMILES	7T-SMILES transformations, 7T-1:7T-7, applied to recognize carbon attachment to C7F15 moiety, (C7F15)C
In-Rule	In-Rule check for presence of 7T in transformed SMILES, YES or NO, to satisfy first section of PFOA definition
36-Manual-override	36 substances incorrectly predicted to be In-Rule YES due to presence of multiple perfluoro chains, manual overide change to NO
C7F15-C linear	indicator [1=yes, 0=no] that structure contains linear C7F15-C substructure in ACD Labs Spectrus search
YES+branched	indicator [1=yes, 0=no] that structure with In-Rule=YES DOES NOT contains linear C7F15-C substructure, \branched
S4.SMILES_OutRule
DTXSID	same as for S1
Substance_Name	same as for S1
Substance_CASRN	same as for S1
Structure_SMILES	same as for S1
PFASSTRUCTv4	same as for S2
OECD_2018	same as for S2
2021 PFOA Indicative List SORT	same as for S1
2021 PFOA Indicative List Status	same as for S1
QT-SMILES	same as for S3
In-Rule	same as for S3
36-Manual-override-NO	same as for S3
C7F15-C linear	same as for S3
YES+branched	same as for S3
XQT-SMILES	XQT-SMILES transformations, X-1:X-3, applied to check if structure satisfies OutRule(i) C8F17-F,Cl,Br
8#QT-SMILES	8#QT-SMILES transformations, 8Y-1:8Y-3, applied to check if structure satisfies OutRule(ii) (COOH)C8F16 or >C8
8YQT-SMILES	8YQT-SMILES transformations, 8Y-1:8Y-3, applied to check if structure satisfies OutRule(ii) (COOH)C8F16 or >C8
8PQT-SMILES	8PQT-SMILES transformations, 8P-1:8P-3, applied to check if structure satisfies OutRule(ii) (O)P(=O)C8F16 or >C8
9SQT-SMILES	9SQT-SMILES transformations, 9S-1:9S-3, applied to check if structure satisfies OutRule(iii) SO3-C9F18 or >C9
EXX-SMILES	EXX-SMILES transformations, EXX-1:EXX-3, applied to check if structure satisfies OutRule(iv) Exceptions PFOS, PFOSF,NEtFOSA
OutRule(i) C8F17-X	Out-Rule check for linear or branched C8F17-X (X=F,Cl,Br) in XQT SMILES, YES or NO, to satisfy PFOA and related compounds definition exclusion (i)
OutRule(ii) (COOH)C8F16 or >C8	Out-Rule check for linear or branched (COOH)C8F16 or >C8 in 8#QT SMILES, YES or NO, to satisfy PFOA and related compounds definition exclusion (ii)
OutRule(ii) XC(=O)C8F16 or >C8, X=F,Cl,Br	Out-Rule check for linear or branched XC(=O)C8F16 or >C8, X=F,Cl,Br in 8YQT SMILES, YES or NO, to satisfy PFOA and related compounds definition exclusion (ii)
OutRule(ii) (O)P(=O)C8F16 or >C8	Out-Rule check for linear or branched (O)P(=O)C8F16 or >C8 in 8PQT SMILES, YES or NO, to satisfy PFOA and related compounds definition exclusion (ii)
OutRule(iii) SO3-C9F18 or >C9	Out-Rule check for linear or branched SO3-C9F18 or >C9 in 9SQT SMILES, YES or NO, to satisfy PFOA and related compounds definition exclusion (iii)
OutRule(iv) Exceptions PFOS, PFOSF,NEtFOSA	Out-Rule check for linear or branched PFOA, PFOSF, NEtFOSA in EXX SMILES, YES or NO, to satisfy PFOA and related compounds definition exclusion (iv)
All-OutRules	Value is "NO" if any OutRule column entry is NO
Combined Final Rule (MACRO)	Combine In-rule value with All-OutRules value; In-rule YES + All-OutRules NO -> NO
Combined Final Rule + 36Manual-override	Combine In-rule value with All-OutRules value; In-rule YES + All-OutRules NO -> NO; value is changed to NO for the 36Manual-override

## Sheet: S1.2021-Indicative-List
2021 PFOA Indicative List SORT	CAS No.	Category	Acronym	Designation	2021 PFOA Indicative List Status	PFOA	PFOA salts	DTXSID	DTXCID	Substance_Name	Substance_CASRN	Substance_Type	SMILES
1	335-67-1	PFOA	PFOA	Perfluorooctanoic acid	YES	x		DTXSID8031865	DTXCID6011865	Perfluorooctanoic acid	335-67-1	Single Compound	OC(=O)C(F)(F)C(F)(F)C(F)(F)C(F)(F)C(F)(F)C(F)(F)C(F)(F)F
2	45285-51-6	PFOA	PFO	Perfluorooctanoate (conjugate base of the free acid)	YES	x		DTXSID40892486	DTXCID801079662	Perfluorooctanoate	45285-51-6	Single Compound	[O-]C(=O)C(F)(F)C(F)(F)C(F)(F)C(F)(F)C(F)(F)C(F)(F)C(F)(F)F
3	90480-55-0	PFOA isomers		Branched perfluorooctanoic acid	YES	x		DTXSID90881300		Octanoic acid, pentadecafluoro-, branched	90480-55-0	Mixture/Formulation
4	1882109-81-0	PFOA isomers		Hexanoic acid, 2,2,3,4,5,5,6,6,6-nonafluoro-3,4-bis(trifluoromethyl)-	YES	x		DTXSID50896591	DTXCID601326083	Perfluoro-3,4-dimethylhexanoic acid	1882109-81-0	Mixture of Stereoisomers	OC(=O)C(F)(F)C(F)(C(F)(F)F)C(F)(C(F)(F)F)C(F)(F)C(F)(F)F
5	1882109-80-9	PFOA isomers		Hexanoic acid, 2,3,3,4,4,5,6,6,6-nonafluoro-2,5-bis(trifluoromethyl)-	YES	x		DTXSID90896590	DTXCID901326082	Perfluoro-2,5-dimethylhexanoic acid	1882109-80-9	Single Compound	OC(=O)C(F)(C(F)(F)F)C(F)(F)C(F)(F)C(F)(C(F)(F)F)C(F)(F)F
6	1882109-79-6	PFOA isomers		Hexanoic acid, 2,2,3,3,4,5,5,6,6,6-decafluoro-4-(1,1,2,2,2-pentafluoroethyl)-	YES	x		DTXSID80896589	DTXCID201326081	Perfluoro-4-ethylhexanoic acid	1882109-79-6	Single Compound	OC(=O)C(F)(F)C(F)(F)C(F)(C(F)(F)C(F)(F)F)C(F)(F)C(F)(F)F
7	1882109-78-5	PFOA isomers		Hexanoic acid, 2,2,3,4,4,5,5,6,6,6-decafluoro-3-(1,1,2,2,2-pentafluoroethyl)-	YES	x		DTXSID20896588	DTXCID501326080	Perfluoro-3-ethylhexanoic acid	1882109-78-5	Mixture of Stereoisomers	OC(=O)C(F)(F)C(F)(C(F)(F)C(F)(F)F)C(F)(F)C(F)(F)C(F)(F)F
8	1882109-77-4	PFOA isomers		Pentanoic acid, 2,3,3,4,4,5,5,5-octafluoro-2-(1,1,2,2,3,3,3-heptafluoropropyl)-	YES	x		DTXSID60896587	DTXCID201326079	Perfluoro-2-propylpentanoic acid	1882109-77-4	Single Compound	OC(=O)C(F)(C(F)(F)C(F)(F)C(F)(F)F)C(F)(F)C(F)(F)C(F)(F)F
9	1882109-76-3	PFOA isomers		Pentanoic acid, 2,3,3,4,4,5,5,5-octafluoro-2-[1,2,2,2-tetrafluoro-1-(trifluoromethyl)ethyl]-	YES	x		DTXSID00896586	DTXCID501326078	Perfluoro-2-(propan-2-yl)pentanoic acid	1882109-76-3	Mixture of Stereoisomers	OC(=O)C(F)(C(F)(F)C(F)(F)C(F)(F)F)C(F)(C(F)(F)F)C(F)(F)F
10	1882109-75-2	PFOA isomers		Pentanoic acid, 2,2,3,5,5,5-hexafluoro-3,4,4-tris(trifluoromethyl)-	YES	x		DTXSID40896585	DTXCID801326077	Perfluoro-3,4,4-trimethylpentanoic acid	1882109-75-2	Mixture of Stereoisomers	OC(=O)C(F)(F)C(F)(C(F)(F)F)C(C(F)(F)F)(C(F)(F)F)C(F)(F)F
11	1882109-74-1	PFOA isomers		Pentanoic acid, 2,2,4,5,5,5-hexafluoro-3,3,4-tris(trifluoromethyl)-	YES	x		DTXSID80896584	DTXCID101326076	Perfluoro-3,3,4-trimethylpentanoic acid	1882109-74-1	Single Compound	OC(=O)C(F)(F)C(C(F)(F)F)(C(F)(F)F)C(F)(C(F)(F)F)C(F)(F)F
12	1882109-73-0	PFOA isomers		Pentanoic acid, 2,3,3,5,5,5-hexafluoro-2,4,4-tris(trifluoromethyl)-	YES	x		DTXSID20896583	DTXCID401326075	Perfluoro-2,4,4-trimethylpentanoic acid	1882109-73-0	Mixture of Stereoisomers	OC(=O)C(F)(C(F)(F)F)C(F)(F)C(C(F)(F)F)(C(F)(F)F)C(F)(F)F
13	1882109-72-9	PFOA isomers		Pentanoic acid, 2,3,4,5,5,5-hexafluoro-2,3,4-tris(trifluoromethyl)-	YES	x		DTXSID60896582	DTXCID701326074	Perfluoro-2,3,4-trimethylpentanoic acid	1882109-72-9	Mixture of Stereoisomers	OC(=O)C(F)(C(F)(F)F)C(F)(C(F)(F)F)C(F)(C(F)(F)F)C(F)(F)F
14	1882109-71-8	PFOA isomers		Pentanoic acid, 2,4,4,5,5,5-hexafluoro-2,3,3-tris(trifluoromethyl)-	YES	x		DTXSID00896581	DTXCID001326073	Perfluoro-2,3,3-trimethylpentanoic acid	1882109-71-8	Mixture of Stereoisomers	OC(=O)C(F)(C(F)(F)F)C(C(F)(F)F)(C(F)(F)F)C(F)(F)C(F)(F)F
15	1882109-70-7	PFOA isomers		Pentanoic acid, 3,3,4,5,5,5-hexafluoro-2,2,4-tris(trifluoromethyl)-	YES	x		DTXSID40896580	DTXCID301326072	Perfluoro-2,2,4-trimethylpentanoic acid	1882109-70-7	Single Compound	OC(=O)C(C(F)(F)F)(C(F)(F)F)C(F)(F)C(F)(C(F)(F)F)C(F)(F)F
16	1882109-68-3	PFOA isomers		Pentanoic acid, 2,2,3,4,5,5,5-heptafluoro-3-(1,1,2,2,2-pentafluoroethyl)-4-(trifluoromethyl)-	YES	x		DTXSID70896578	DTXCID901326070	Perfluoro-3-(2-propyl)pentanoic acid	1882109-68-3	Mixture of Stereoisomers	OC(=O)C(F)(F)C(F)(C(F)(F)C(F)(F)F)C(F)(C(F)(F)F)C(F)(F)F
17	1882109-67-2	PFOA isomers		Pentanoic acid, 2,2,4,4,5,5,5-heptafluoro-3-(1,1,2,2,2-pentafluoroethyl)-3-(trifluoromethyl)-	YES	x		DTXSID10896577	DTXCID601326069	Perfluoro-3-ethyl-3-methylpentanoic acid	1882109-67-2	Single Compound	OC(=O)C(F)(F)C(C(F)(F)F)(C(F)(F)C(F)(F)F)C(F)(F)C(F)(F)F
18	1882109-66-1	PFOA isomers		Pentanoic acid, 2,3,4,4,5,5,5-heptafluoro-3-(1,1,2,2,2-pentafluoroethyl)-2-(trifluoromethyl)-	YES	x		DTXSID50896576	DTXCID901326068	Perfluoro-3-ethyl-2-methylpentanoic acid	1882109-66-1	Mixture of Stereoisomers	OC(=O)C(F)(C(F)(F)F)C(F)(C(F)(F)C(F)(F)F)C(F)(F)C(F)(F)F
19	1882109-65-0	PFOA isomers		Pentanoic acid, 2,3,3,4,5,5,5-heptafluoro-2-(1,1,2,2,2-pentafluoroethyl)-4-(trifluoromethyl)-	YES	x		DTXSID90896575	DTXCID201326067	Perfluoro-2-ethyl-4-methylpentanoic acid	1882109-65-0	Single Compound	OC(=O)C(F)(C(F)(F)C(F)(F)F)C(F)(F)C(F)(C(F)(F)F)C(F)(F)F
20	1882109-64-9	PFOA isomers		Pentanoic acid, 2,3,4,4,5,5,5-heptafluoro-2-(1,1,2,2,2-pentafluoroethyl)-3-(trifluoromethyl)-	YES	x		DTXSID30896574	DTXCID501326066	Perfluoro-2-ethyl-3-methylpentanoic acid	1882109-64-9	Mixture of Stereoisomers	OC(=O)C(F)(C(F)(F)C(F)(F)F)C(F)(C(F)(F)F)C(F)(F)C(F)(F)F
21	1882109-63-8	PFOA isomers		Pentanoic acid, 3,3,4,4,5,5,5-heptafluoro-2-(1,1,2,2,2-pentafluoroethyl)-2-(trifluoromethyl)-	YES	x		DTXSID70896573	DTXCID801326065	Perfluoro-2-ethyl-2-methylpentanoic acid	1882109-63-8	Mixture of Stereoisomers	OC(=O)C(C(F)(F)F)(C(F)(F)C(F)(F)F)C(F)(F)C(F)(F)C(F)(F)F
22	1882109-69-4	PFOA isomers		Pentanoic acid, 3,4,4,5,5,5-hexafluoro-2,2,3-(trifluoromethyl)-	YES	x		DTXSID30896579	DTXCID601326071	Perfluoro-2,2,3-trimethylpentanoic acid	1882109-69-4	Mixture of Stereoisomers	OC(=O)C(C(F)(F)F)(C(F)(F)F)C(F)(C(F)(F)F)C(F)(F)C(F)(F)F
23	1882109-62-7	PFOA isomers		Butanoic acid, 4,4,4-trifluoro-2,2,3,3-tetrakis(trifluoromethyl)-	YES	x		DTXSID10896572	DTXCID101326064	Perfluoro-2,2,3,3-tetramethylbutanoic acid	1882109-62-7	Single Compound	OC(=O)C(C(F)(F)F)(C(F)(F)F)C(C(F)(F)F)(C(F)(F)F)C(F)(F)F
24	1882109-61-6	PFOA isomers		Butanoic acid, 2,3,4,4,4-pentafluoro-2-[1,2,2,2-tetrafluoro-1-(trifluoromethyl)ethyl]-3-(trifluoromethyl)-	YES	x		DTXSID50896571	DTXCID401326063	Perfluoro-3-methyl-2-(2-propyl)butanoic acid	1882109-61-6	Single Compound	OC(=O)C(F)(C(F)(C(F)(F)F)C(F)(F)F)C(F)(C(F)(F)F)C(F)(F)F
25	1882109-60-5	PFOA isomers		Butanoic acid, 2,3,3,4,4,4-hexafluoro-2-[2,2,2-trifluoro-1,1-bis(trifluoromethyl)ethyl]-	YES	x		DTXSID90896570	DTXCID701326062	Perfluoro-2-ethyl-3,3-dimethylbutanoic acid	1882109-60-5	Single Compound	OC(=O)C(F)(C(F)(F)C(F)(F)F)C(C(F)(F)F)(C(F)(F)F)C(F)(F)F
26	1882109-59-2	PFOA isomers		Butanoic acid, 3,3,4,4,4-pentafluoro-2-[1,2,2,2-tetrafluoro-1-(trifluoromethyl)ethyl]-2-(trifluoromethyl)-	YES	x		DTXSID80896569	DTXCID001326061	Perfluoro-2-ethyl-2,3-dimethylbutanoic acid	1882109-59-2	Mixture of Stereoisomers	OC(=O)C(C(F)(F)F)(C(F)(F)C(F)(F)F)C(F)(C(F)(F)F)C(F)(F)F
27	1882109-58-1	PFOA isomers		Butanoic acid, 3,3,4,4,4-pentafluoro-2,2-bis(1,1,2,2,2-pentafluoroethyl)-	YES	x		DTXSID20896568	DTXCID301326060	Perfluoro-2,2-diethylbutanoic acid	1882109-58-1	Single Compound	OC(=O)C(C(F)(F)C(F)(F)F)(C(F)(F)C(F)(F)F)C(F)(F)C(F)(F)F
28	1812247-20-3	PFOA isomers		Hexanoic acid, 2,2,4,4,5,5,6,6,6-nonafluoro-3,3-bis(trifluoromethyl)-	YES	x		DTXSID60896567	DTXCID001326059	Perfluoro-3,3-dimethylhexanoic acid	1812247-20-3	Single Compound	OC(=O)C(F)(F)C(C(F)(F)F)(C(F)(F)F)C(F)(F)C(F)(F)C(F)(F)F
29	1812247-19-0	PFOA isomers		Hexanoic acid, 2,3,3,4,5,5,6,6,6-nonafluoro-2,4-bis(trifluoromethyl)-	YES	x		DTXSID20896604	DTXCID301326096	Perfluoro-2,4-dimethylhexanoic acid	1812247-19-0	Mixture of Stereoisomers	OC(=O)C(F)(C(F)(F)F)C(F)(F)C(F)(C(F)(F)F)C(F)(F)C(F)(F)F
30	1812247-18-9	PFOA isomers		Hexanoic acid, 2,3,4,4,5,5,6,6,6-nonafluoro-2,3-bis(trifluoromethyl)-	YES	x		DTXSID60896603	DTXCID601326095	Perfluoro-2,3-dimethylhexanoic acid	1812247-18-9	Mixture of Stereoisomers	OC(=O)C(F)(C(F)(F)F)C(F)(C(F)(F)F)C(F)(F)C(F)(F)C(F)(F)F
31	1812247-17-8	PFOA isomers		Hexanoic acid, 3,3,4,4,5,5,6,6,6-nonafluoro-2,2-bis(trifluoromethyl)-	YES	x		DTXSID00896602	DTXCID901326094	Perfluoro-2,2-dimethylhexanoic acid	1812247-17-8	Single Compound	OC(=O)C(C(F)(F)F)(C(F)(F)F)C(F)(F)C(F)(F)C(F)(F)C(F)(F)F
32	1192593-79-5	PFOA isomers		Hexanoic acid, 2,2,3,3,5,5,6,6,6-nonafluoro-4,4-bis(trifluoromethyl)-	YES	x		DTXSID40896601	DTXCID201326093	Perfluoro-4,4-dimethylhexanoic acid	1192593-79-5	Single Compound	OC(=O)C(F)(F)C(F)(F)C(C(F)(F)F)(C(F)(F)F)C(F)(F)C(F)(F)F
33	1144512-36-6	PFOA isomers		Hexanoic acid, 2,2,3,3,4,5,6,6,6-nonafluoro-4,5-bis(trifluoromethyl)-	YES	x		DTXSID80896600	DTXCID501326092	Perfluoro-4,5-dimethylhexanoic acid	1144512-36-6	Single Compound	OC(=O)C(F)(F)C(F)(F)C(F)(C(F)(F)F)C(F)(C(F)(F)F)C(F)(F)F
34	1144512-35-5	PFOA isomers		Hexanoic acid, 2,2,3,4,4,5,6,6,6-nonafluoro-3,5-bis(trifluoromethyl)-	YES	x		DTXSID30896599	DTXCID801326091	Perfluoro-3,5-dimethylhexanoic acid	1144512-35-5	Mixture of Stereoisomers	OC(=O)C(F)(F)C(F)(C(F)(F)F)C(F)(F)C(F)(C(F)(F)F)C(F)(F)F
35	1144512-34-4	PFOA isomers		Hexanoic acid, 2,2,3,3,4,4,6,6,6-nonafluoro-5,5-bis(trifluoromethyl)-	YES	x		DTXSID70896598	DTXCID101326090	Perfluoro-5,5-dimethylhexanoic acid	1144512-34-4	Single Compound	OC(=O)C(F)(F)C(F)(F)C(F)(F)C(C(F)(F)F)(C(F)(F)F)C(F)(F)F
36	1144512-18-4	PFOA isomers		Heptanoic acid, 2,2,3,3,4,5,5,6,6,7,7,7-dodecafluoro-4-(trifluoromethyl)-	YES	x		DTXSID10896597	DTXCID801326089	Perfluoro-4-methylheptanoic acid	1144512-18-4	Mixture of Stereoisomers	OC(=O)C(F)(F)C(F)(F)C(F)(C(F)(F)F)C(F)(F)C(F)(F)C(F)(F)F
37	909009-42-3	PFOA isomers		Heptanoic acid, 2,2,3,3,4,4,5,6,6,7,7,7-dodecafluoro-5-(trifluoromethyl)-	YES	x		DTXSID50896596	DTXCID101326088	Perfluoro-5-methylheptanoic acid	909009-42-3	Mixture of Stereoisomers	OC(=O)C(F)(F)C(F)(F)C(F)(F)C(F)(C(F)(F)F)C(F)(F)C(F)(F)F
38	705240-04-6	PFOA isomers		Heptanoic acid, 2,2,3,4,4,5,5,6,6,7,7,7-dodecafluoro-3-(trifluoromethyl)-	YES	x		DTXSID90896595	DTXCID401326087	Perfluoro-3-methylheptanoic acid	705240-04-6	Single Compound	OC(=O)C(F)(F)C(F)(C(F)(F)F)C(F)(F)C(F)(F)C(F)(F)C(F)(F)F
39	207678-51-1	PFOA isomers		Heptanoic acid, 2,3,3,4,4,5,5,6,6,7,7,7-dodecafluoro-2-(trifluoromethyl)-	YES	x		DTXSID70896593	DTXCID001326085	Perfluoro-2-methylheptanoic acid	207678-51-1	Mixture of Stereoisomers	OC(=O)C(F)(C(F)(F)F)C(F)(F)C(F)(F)C(F)(F)C(F)(F)C(F)(F)F
40	123116-17-6	PFOA isomers		Isooctanoic acid, pentadecafluoro-	YES	x		DTXSID50897543	Markush	Pentadecafluoroisooctanoic acid	123116-17-6	Mixture/Formulation
41	35605-76-6	PFOA isomers		Hexanoic acid, 2,3,3,4,4,5,5,6,6,6-decafluoro-2-(1,1,2,2,2-pentafluoroethyl)-	YES	x		DTXSID10896592	DTXCID301326084	Perfluoro-2-ethylhexanoic acid	35605-76-6	Mixture of Stereoisomers	OC(=O)C(F)(C(F)(F)C(F)(F)F)C(F)(F)C(F)(F)C(F)(F)C(F)(F)F
42	15166-06-0	PFOA isomers		Heptanoic acid, 2,2,3,3,4,4,5,5,6,7,7,7-dodecafluoro-6-(trifluoromethyl)-	YES	x		DTXSID50562865	DTXCID60513641	Perfluoro-6-(trifluoromethyl)heptanoic acid	15166-06-0	Single Compound	OC(=O)C(F)(F)C(F)(F)C(F)(F)C(F)(F)C(F)(C(F)(F)F)C(F)(F)F
43	90480-56-1	PFOA salts (including linear and branched isomers)	APFO	Ammonium salt, linear/branched PFOA (Octanoic acid, pentadecafluoro-, branched, ammonium salt)	YES		x	DTXSID50881301		Octanoic acid, pentadecafluoro-, branched, ammonium salt	90480-56-1	Mixture/Formulation
44	3825-26-1	PFOA salts (including linear and branched isomers)	APFO	Octanoic acid, 2,2,3,3,4,4,5,5,6,6,7,7,8,8,8-pentadecafluoro-, ammonium salt (1:1)	YES		x	DTXSID8037708	DTXCID6017708	Ammonium perfluorooctanoate	3825-26-1	Single Compound	[NH4+].[O-]C(=O)C(F)(F)C(F)(F)C(F)(F)C(F)(F)C(F)(F)C(F)(F)C(F)(F)F
45	335-95-5	PFOA salts (including linear and branched isomers)	Na-PFOA	Octanoic acid, 2,2,3,3,4,4,5,5,6,6,7,7,8,8,8-pentadecafluoro-, sodium salt (1:1)	YES		x	DTXSID40880025	DTXCID301021632	Sodium perfluorooctanoate	335-95-5	Single Compound	[Na+].[O-]C(=O)C(F)(F)C(F)(F)C(F)(F)C(F)(F)C(F)(F)C(F)(F)C(F)(F)F
46	2395-00-8	PFOA salts (including linear and branched isomers)	K-PFOA	Octanoic acid, 2,2,3,3,4,4,5,5,6,6,7,7,8,8,8-pentadecafluoro-, potassium salt (1:1)	YES		x	DTXSID00880026	DTXCID001021633	Potassium perfluorooctanoate	2395-00-8	Single Compound	[K+].[O-]C(=O)C(F)(F)C(F)(F)C(F)(F)C(F)(F)C(F)(F)C(F)(F)C(F)(F)F
47	17125-58-5	PFOA salts (including linear and branched isomers)	Li-PFOA	Octanoic acid, 2,2,3,3,4,4,5,5,6,6,7,7,8,8,8-pentadecafluoro-, lithium salt (1:1)	YES		x	DTXSID201021922	DTXCID201506837	Lithium perfluorooctanoate	17125-58-5	Single Compound	[Li+].[O-]C(=O)C(F)(F)C(F)(F)C(F)(F)C(F)(F)C(F)(F)C(F)(F)C(F)(F)F
48	335-93-3	PFOA salts (including linear and branched isomers)		Octanoic acid, 2,2,3,3,4,4,5,5,6,6,7,7,8,8,8-pentadecafluoro-, silver(1+) salt (1:1)	YES		x	DTXSID00880127	DTXCID901021723	Silver perfluorooctanoate	335-93-3	Single Compound	[Ag+].[O-]C(=O)C(F)(F)C(F)(F)C(F)(F)C(F)(F)C(F)(F)C(F)(F)C(F)(F)F
49	68141-02-6	PFOA salts (including linear and branched isomers)		Octanoic acid, 2,2,3,3,4,4,5,5,6,6,7,7,8,8,8-pentadecafluoro-, chromium(3+) salt (3:1)	YES		x	DTXSID00880581	DTXCID701021965	Chromium(3+) perfluorooctanoate	68141-02-6	Single Compound	[Cr+3].[O-]C(=O)C(F)(F)C(F)(F)C(F)(F)C(F)(F)C(F)(F)C(F)(F)C(F)(F)F.[O-]C(=O)C(F)(F)C(F)(F)C(F)(F)C(F)(F)C(F)(F)C(F)(F)C(F)(F)F.[O-]C(=O)C(F)(F)C(F)(F)C(F)(F)C(F)(F)C(F)(F)C(F)(F)C(F)(F)F
50	98241-25-9	PFOA salts (including linear and branched isomers)		Ethanaminium, N,N,N-triethyl-, 2,2,3,3,4,4,5,5,6,6,7,7,8,8,8-pentadecafluorooctanoate (1:1)	YES		x	DTXSID30895567	DTXCID501325082	N,N,N-Triethylethanaminium perfluorooctanoate	98241-25-9	Single Compound	CC[N+](CC)(CC)CC.[O-]C(=O)C(F)(F)C(F)(F)C(F)(F)C(F)(F)C(F)(F)C(F)(F)C(F)(F)F
51	13058-06-5	PFOA salts (including linear and branched isomers)		Hexanoic acid, 2,3,3,4,4,5,5,6,6,6-decafluoro-2-(1,1,2,2,2- pentafluoroethyl)-, ammonium salt (1:1)	YES		x	DTXSID20896649	DTXCID301326141	Ammonium perfluoro-2-ethylhexanoate	13058-06-5	Mixture of Stereoisomers	[NH4+].[O-]C(=O)C(F)(C(F)(F)C(F)(F)F)C(F)(F)C(F)(F)C(F)(F)C(F)(F)F
52	1195164-59-0	PFOA salts (including linear and branched isomers)		Hexanoic acid, 2,3,3,4,4,5,5,6,6,6-decafluoro-2-(1,1,2,2,2-pentafluoroethyl)-, sodium salt (1:1)	YES		x	DTXSID10896653	DTXCID101326145	Sodium perfluoro-2-ethylhexanoate	1195164-59-0	Mixture of Stereoisomers	[Na+].[O-]C(=O)C(F)(C(F)(F)C(F)(F)F)C(F)(F)C(F)(F)C(F)(F)C(F)(F)F
53	19742-57-5	PFOA salts (including linear and branched isomers)		Heptanoic acid, 2,2,3,3,4,4,5,5,6,7,7,7-dodecafluoro-6-(trifluoromethyl)-, ammonium salt (1:1)	YES		x	DTXSID90896651	DTXCID701326143	Ammonium perfluoro-6-methylheptanoate	19742-57-5	Single Compound	[NH4+].[O-]C(=O)C(F)(F)C(F)(F)C(F)(F)C(F)(F)C(F)(C(F)(F)F)C(F)(F)F
54	61436-04-2	PFOA salts (including linear and branched isomers)		Heptanoic acid, 2,2,3,3,4,4,5,5,6,7,7,7-dodecafluoro-6-(trifluoromethyl)-, iron salt (1:x)	YES		x	DTXSID30897566		Perfluoro-6-methylheptanoic acid, iron salt (1:x)	61436-04-2	Mixture/Formulation
55	29457-73-6	PFOA salts (including linear and branched isomers)		Heptanoic acid, 2,2,3,3,4,4,5,5,6,7,7,7-dodecafluoro-6-(trifluoromethyl)-, potassium salt (1:1)	YES		x	DTXSID50896652	DTXCID401326144	Potassium perfluoro-6-methylheptanoate	29457-73-6	Single Compound	[K+].[O-]C(=O)C(F)(F)C(F)(F)C(F)(F)C(F)(F)C(F)(C(F)(F)F)C(F)(F)F
56	18017-22-6	PFOA salts (including linear and branched isomers)		Heptanoic acid, 2,2,3,3,4,4,5,5,6,7,7,7-dodecafluoro-6-(trifluoromethyl)- , sodium salt (1:1)	YES		x	DTXSID30896650	DTXCID001326142	Sodium perfluoro-6-methylheptanoate	18017-22-6	Single Compound	[Na+].[O-]C(=O)C(F)(F)C(F)(F)C(F)(F)C(F)(F)C(F)(C(F)(F)F)C(F)(F)F
57	15739-82-9	PFOA salts (including linear and branched isomers)		Heptanoic acid, 2,2,3,3,4,4,5,5,6,7,7,7-dodecafluoro-6-(trifluoromethyl)-, chromium salt (1:x)	YES		x	DTXSID20897575		Perfluoro-6-(methyl)heptanoic acid, chromium (1:x)	15739-82-9	Mixture/Formulation
58	15715-47-6	PFOA salts (including linear and branched isomers)		Heptanoic acid, 2,2,3,3,4,4,5,5,6,7,7,7-dodecafluoro-6-(trifluoromethyl)-, aluminum salt (3:1)	YES		x	DTXSID10897549	DTXCID001326897	Aluminum perfluoro-6-methylheptanoate	15715-47-6	Single Compound	[Al+3].[O-]C(=O)C(F)(F)C(F)(F)C(F)(F)C(F)(F)C(F)(C(F)(F)F)C(F)(F)F.[O-]C(=O)C(F)(F)C(F)(F)C(F)(F)C(F)(F)C(F)(C(F)(F)F)C(F)(F)F.[O-]C(=O)C(F)(F)C(F)(F)C(F)(F)C(F)(F)C(F)(C(F)(F)F)C(F)(F)F
59	68333-92-6	Other PFCA mixtures containing PFOA		Fatty acids, C7-13, perfluoro	YES			DTXSID3097848	Markush	Perfluoro-fatty acids C7-13	68333-92-6	Mixture/Formulation
60	69278-80-4	Other PFCA mixtures containing PFOA		Ethylamine salts of C7-C13 perfluorinated fatty acids	YES			DTXSID90103054	Markush	Fatty acids, C7-13, perfluoro, compds. with ethylamine	69278-80-4	Mixture/Formulation
61	91032-01-8	Other PFCA mixtures containing PFOA		Fatty acids, C7-19, perfluoro	YES			DTXSID00881311	Markush	Fatty acids, C7-19, perfluoro	91032-01-8	Mixture/Formulation
62	72968-38-8	Other PFCA mixtures containing PFOA		Fatty acids, C7-13, perfluoro, ammonium salts	YES			DTXSID80104590	Markush	Fatty acids, C7-13, perfluoro, ammonium salts	72968-38-8	Mixture/Formulation
63	72623-77-9	Other PFCA mixtures containing PFOA		Fatty acids, C6-18, perfluoro, ammonium salts	YES			DTXSID90104480	Markush	Fatty acids, C6-18, perfluoro, ammonium salts	72623-77-9	Mixture/Formulation
64	376-27-2	PFOA esters and anhydrides		Octanoic acid, 2,2,3,3,4,4,5,5,6,6,7,7,8,8,8-pentadecafluoro-, methyl ester	YES			DTXSID8059924	DTXCID9039365	Methyl perfluorooctanoate	376-27-2	Single Compound	COC(=O)C(F)(F)C(F)(F)C(F)(F)C(F)(F)C(F)(F)C(F)(F)C(F)(F)F
65	3108-24-5	PFOA esters and anhydrides		Octanoic acid, 2,2,3,3,4,4,5,5,6,6,7,7,8,8,8-pentadecafluoro-, ethyl ester	YES			DTXSID5062849	DTXCID6038297	Ethyl perfluorooctanoate	3108-24-5	Single Compound	CCOC(=O)C(F)(F)C(F)(F)C(F)(F)C(F)(F)C(F)(F)C(F)(F)C(F)(F)F
66	33496-48-9	PFOA esters and anhydrides		Octanoic acid, 2,2,3,3,4,4,5,5,6,6,7,7,8,8,8-pentadecafluoro-, 1,1'-anhydride	YES			DTXSID80880387	DTXCID101021850	Perfluorooctanoic anhydride	33496-48-9	Single Compound	FC(F)(F)C(F)(F)C(F)(F)C(F)(F)C(F)(F)C(F)(F)C(F)(F)C(=O)OC(=O)C(F)(F)C(F)(F)C(F)(F)C(F)(F)C(F)(F)C(F)(F)C(F)(F)F
67	68412-69-1	Perfluoroalkyl phosphonic and phosphinic acids (PFPAs and PFPiAs)		Phosphinic acid, bis(perfluoro-C6-12-alkyl) derivs.	YES			DTXSID80881990	Markush	Phosphinic acid, bis(perfluoro-C6-12-alkyl) derivs.	68412-69-1	Mixture/Formulation
68	93062-53-4	Perfluoroalkyl phosphonic and phosphinic acids (PFPAs and PFPiAs)		Phosphinic acid, bis(perfluoro-C6-12-alkyl) derivs., aluminum salts	YES			DTXSID90881325	Markush	Phosphinic acid, bis(perfluoro-C6-12-alkyl) derivs., aluminum salts	93062-53-4	Mixture/Formulation
69	40143-79-1	Perfluoroalkyl phosphonic and phosphinic acids (PFPAs and PFPiAs)	C8/C8-PFPIA	Bis(perfluorooctyl)phosphinic acid	YES			DTXSID80543001	DTXCID10493787	Bis(heptadecafluorooctyl)phosphinic acid	40143-79-1	Single Compound	OP(=O)(C(F)(F)C(F)(F)C(F)(F)C(F)(F)C(F)(F)C(F)(F)C(F)(F)C(F)(F)F)C(F)(F)C(F)(F)C(F)(F)C(F)(F)C(F)(F)C(F)(F)C(F)(F)C(F)(F)F
70	610800-34-5	Perfluoroalkyl phosphonic and phosphinic acids (PFPAs and PFPiAs)	C6/C8-PFPIA	Perfluorohexylperfluorooctyl phosphinate	YES			DTXSID30896594	DTXCID701326086	Perfluorohexylperfluorooctyl phosphinic acid	610800-34-5	Single Compound	OP(=O)(C(F)(F)C(F)(F)C(F)(F)C(F)(F)C(F)(F)C(F)(F)F)C(F)(F)C(F)(F)C(F)(F)C(F)(F)C(F)(F)C(F)(F)C(F)(F)C(F)(F)F
71	335-66-0	Perfluoroalkyl halides (incl. linear and branched isomers)		Octanoyl fluoride, 2,2,3,3,4,4,5,5,6,6,7,7,8,8,8-pentadecafluoro-	YES			DTXSID0059829	DTXCID8038693	Perfluorooctanoyl fluoride	335-66-0	Single Compound	FC(=O)C(F)(F)C(F)(F)C(F)(F)C(F)(F)C(F)(F)C(F)(F)C(F)(F)F
72	507-63-1	Perfluoroalkyl halides (incl. linear and branched isomers)	PFOI	Perfluorooctyl iodide	YES			DTXSID0060147	DTXCID6040901	Perfluorooctyl iodide	507-63-1	Single Compound	FC(F)(F)C(F)(F)C(F)(F)C(F)(F)C(F)(F)C(F)(F)C(F)(F)C(F)(F)I
73	307-50-6	Perfluoroalkyl halides (incl. linear and branched isomers)		Undecane, 1,1,1,2,2,3,3,4,4,5,5,6,6,7,7,8,8,9,9,10,10,11,11-tricosafluoro-11-iodo-	YES			DTXSID00880122	DTXCID801021718	1-Iodoperfluoroundecane	307-50-6	Single Compound	FC(F)(F)C(F)(F)C(F)(F)C(F)(F)C(F)(F)C(F)(F)C(F)(F)C(F)(F)C(F)(F)C(F)(F)C(F)(F)I
74	307-60-8	Perfluoroalkyl halides (incl. linear and branched isomers)		Dodecane, 1,1,1,2,2,3,3,4,4,5,5,6,6,7,7,8,8,9,9,10,10,11,11,12,12-pentacosafluoro-12-iodo-	YES			DTXSID0059796	DTXCID2038239	Pentacosafluoro-1-iodododecane	307-60-8	Single Compound	FC(F)(F)C(F)(F)C(F)(F)C(F)(F)C(F)(F)C(F)(F)C(F)(F)C(F)(F)C(F)(F)C(F)(F)C(F)(F)C(F)(F)I
75	307-63-1	Perfluoroalkyl halides (incl. linear and branched isomers)		Tetradecane, 1,1,1,2,2,3,3,4,4,5,5,6,6,7,7,8,8,9,9,10,10,11,11,12,12,13,13,14,14-nonacosafluoro-14-iodo-	YES			DTXSID5059797	DTXCID1038240	Nonacosafluoro-1-iodotetradecane	307-63-1	Single Compound	FC(F)(F)C(F)(F)C(F)(F)C(F)(F)C(F)(F)C(F)(F)C(F)(F)C(F)(F)C(F)(F)C(F)(F)C(F)(F)C(F)(F)C(F)(F)C(F)(F)I
76	335-79-5	Perfluoroalkyl halides (incl. linear and branched isomers)		Pentadecane, 1,1,1,2,2,3,3,4,4,5,5,6,6,7,7,8,8,9,9,10,10,11,11,12,12,13,13,14,14,15,15-hentriacontafluoro-15-iodo-	YES			DTXSID40880126	DTXCID201021722	Perfluoropentadecyl iodide	335-79-5	Single Compound	FC(F)(F)C(F)(F)C(F)(F)C(F)(F)C(F)(F)C(F)(F)C(F)(F)C(F)(F)C(F)(F)C(F)(F)C(F)(F)C(F)(F)C(F)(F)C(F)(F)C(F)(F)I
77	376-04-5	Perfluoroalkyl halides (incl. linear and branched isomers)		Tridecane, 1,1,1,2,2,3,3,4,4,5,5,6,6,7,7,8,8,9,9,10,10,11,11,12,12,13,13-heptacosafluoro-13-iodo-	YES			DTXSID10880138	DTXCID501021733	Perfluorotridecyl iodide	376-04-5	Single Compound	FC(F)(F)C(F)(F)C(F)(F)C(F)(F)C(F)(F)C(F)(F)C(F)(F)C(F)(F)C(F)(F)C(F)(F)C(F)(F)C(F)(F)C(F)(F)I
78	423-62-1	Perfluoroalkyl halides (incl. linear and branched isomers)		Decane, 1,1,1,2,2,3,3,4,4,5,5,6,6,7,7,8,8,9,9,10,10-heneicosafluoro-10-iodo-	YES			DTXSID8059974	DTXCID1040085	Perfluorodecyl iodide	423-62-1	Single Compound	FC(F)(F)C(F)(F)C(F)(F)C(F)(F)C(F)(F)C(F)(F)C(F)(F)C(F)(F)C(F)(F)C(F)(F)I
79	558-97-4	Perfluoroalkyl halides (incl. linear and branched isomers)		Nonane, 1,1,1,2,2,3,3,4,4,5,5,6,6,7,7,8,8,9,9-nonadecafluoro-9-iodo-	YES			DTXSID2060331	DTXCID1041972	Nonadecafluoro-9-Iodononane	558-97-4	Single Compound	FC(F)(F)C(F)(F)C(F)(F)C(F)(F)C(F)(F)C(F)(F)C(F)(F)C(F)(F)C(F)(F)I
80	677-93-0	Perfluoroalkyl halides (incl. linear and branched isomers)		Decane, 1,1,1,2,3,3,4,4,5,5,6,6,7,7,8,8,9,9,10,10-eicosafluoro-10-iodo-2-(trifluoromethyl)-	YES			DTXSID5060984	DTXCID5044990	Icosafluoro-10-iodo-2-(trifluoromethyl)decane	677-93-0	Single Compound	FC(F)(F)C(F)(C(F)(F)F)C(F)(F)C(F)(F)C(F)(F)C(F)(F)C(F)(F)C(F)(F)C(F)(F)C(F)(F)I
81	3248-61-1	Perfluoroalkyl halides (incl. linear and branched isomers)		Dodecane, 1,1,1,2,3,3,4,4,5,5,6,6,7,7,8,8,9,9,10,10,11,11,12,12-tetracosafluoro-12-iodo-2-(trifluoromethyl)-	YES			DTXSID4062933	DTXCID8038518	Tetracosafluoro-1-iodo-11-(trifluoromethyl)dodecane	3248-61-1	Single Compound	FC(F)(F)C(F)(C(F)(F)F)C(F)(F)C(F)(F)C(F)(F)C(F)(F)C(F)(F)C(F)(F)C(F)(F)C(F)(F)C(F)(F)C(F)(F)I
82	3248-63-3	Perfluoroalkyl halides (incl. linear and branched isomers)		Tetradecane, 1,1,1,2,3,3,4,4,5,5,6,6,7,7,8,8,9,9,10,10,11,11,12,12,13,13,14,14-octacosafluoro-14-iodo-2-(trifluoromethyl)-	YES			DTXSID9062934	DTXCID3038519	Octacosafluoro-14-iodo-2-(trifluoromethyl)tetradecane	3248-63-3	Single Compound	FC(F)(F)C(F)(C(F)(F)F)C(F)(F)C(F)(F)C(F)(F)C(F)(F)C(F)(F)C(F)(F)C(F)(F)C(F)(F)C(F)(F)C(F)(F)C(F)(F)C(F)(F)I
83	90622-71-2	Perfluoroalkyl halides (incl. linear and branched isomers)		Alkyl iodides, C6-18, perfluoro	YES			DTXSID10881307		Alkyl iodides, C6-18, perfluoro	90622-71-2	Mixture/Formulation
84	2043-53-0	Fluorotelomer iodides (FTIs)	8:2 FTI	Decane, 1,1,1,2,2,3,3,4,4,5,5,6,6,7,7,8,8-heptadecafluoro-10-iodo-	YES			DTXSID6062123	DTXCID7036290	1-(Perfluorooctyl)-2-iodoethane	2043-53-0	Single Compound	FC(F)(F)C(F)(F)C(F)(F)C(F)(F)C(F)(F)C(F)(F)C(F)(F)C(F)(F)CCI
85	2043-54-1	Fluorotelomer iodides (FTIs)	10:2 FTI	Dodecane, 1,1,1,2,2,3,3,4,4,5,5,6,6,7,7,8,8,9,9,10,10-heneicosafluoro-12-iodo-	YES			DTXSID1062124	DTXCID2036291	10:2 Fluorotelomer iodide	2043-54-1	Single Compound	FC(F)(F)C(F)(F)C(F)(F)C(F)(F)C(F)(F)C(F)(F)C(F)(F)C(F)(F)C(F)(F)C(F)(F)CCI
86	30046-31-2	Fluorotelomer iodides (FTIs)	12:2 FTI	Tetradecane, 1,1,1,2,2,3,3,4,4,5,5,6,6,7,7,8,8,9,9,10,10,11,11,12,12- pentacosafluoro-14-iodo-	YES			DTXSID2067535	DTXCID0038124	1-Iodo-1H,1H,2H,2H-perfluorotetradecane	30046-31-2	Single Compound	FC(F)(F)C(F)(F)C(F)(F)C(F)(F)C(F)(F)C(F)(F)C(F)(F)C(F)(F)C(F)(F)C(F)(F)C(F)(F)C(F)(F)CCI
87	65510-55-6	Fluorotelomer iodides (FTIs)	14:2 FTI	Hexadecane, 1,1,1,2,2,3,3,4,4,5,5,6,6,7,7,8,8,9,9,10,10,11,11,12,12,13,13,14, 14-nonacosafluoro-16-iodo-	YES			DTXSID4070322	DTXCID3044621	2-(Perfluorotetradecyl)-1-iodoethane	65510-55-6	Single Compound	FC(F)(F)C(F)(F)C(F)(F)C(F)(F)C(F)(F)C(F)(F)C(F)(F)C(F)(F)C(F)(F)C(F)(F)C(F)(F)C(F)(F)C(F)(F)C(F)(F)CCI
88	65510-56-7	Fluorotelomer iodides (FTIs)	9:2 FTI	Undecane, 1,1,1,2,2,3,3,4,4,5,5,6,6,7,7,8,8,9,9-nonadecafluoro-11-iodo-	YES			DTXSID9070323	DTXCID8044622	1-(Perfluorononyl)-2-iodoethane	65510-56-7	Single Compound	FC(F)(F)C(F)(F)C(F)(F)C(F)(F)C(F)(F)C(F)(F)C(F)(F)C(F)(F)C(F)(F)CCI
89	68188-12-5	Fluorotelomer iodides (FTIs)	FTIs	Alkyl iodides, C4-20, γ-ω-perfluoro	YES			DTXSID60881973	Markush	Alkyl iodides C4-20 .gamma.-.omega.-perfluoro-	68188-12-5	Mixture/Formulation
90	68390-33-0	Fluorotelomer iodides (FTIs)	FTIs	Alkyl iodides, C10-12, γ-ω-perfluoro	YES			DTXSID00881997	Markush	Alkyl iodides, C10-12, .gamma.-.omega.-perfluoro-	68390-33-0	Mixture/Formulation
91	21652-58-4	Fluorotelomer oelfins (FTOs)	8:2 FTO	8:2 Fluorotelomer olefin	YES			DTXSID7074616	DTXCID2036532	1H,1H,2H-Perfluoro-1-decene	21652-58-4	Single Compound	FC(F)(F)C(F)(F)C(F)(F)C(F)(F)C(F)(F)C(F)(F)C(F)(F)C(F)(F)C=C
92	30389-25-4	Fluorotelomer oelfins (FTOs)	10:2 FTO	1-Dodecene, 3,3,4,4,5,5,6,6,7,7,8,8,9,9,10,10,11,11,12,12,12-heneicosafluoro-	YES			DTXSID60184471	DTXCID70106962	(Perfluorodecyl)ethylene	30389-25-4	Single Compound	FC(F)(F)C(F)(F)C(F)(F)C(F)(F)C(F)(F)C(F)(F)C(F)(F)C(F)(F)C(F)(F)C(F)(F)C=C
93	60699-51-6	Fluorotelomer alcohols (FTOHs)	14:2 FTOH	1-Hexadecanol, 3,3,4,4,5,5,6,6,7,7,8,8,9,9,10,10,11,11,12,12,13,13,14,14,15,15,16,16,16-nonacosafluoro-	YES			DTXSID4069422	DTXCID7042859	2-(Perfluorotetradecyl)ethan-1-ol	60699-51-6	Single Compound	OCCC(F)(F)C(F)(F)C(F)(F)C(F)(F)C(F)(F)C(F)(F)C(F)(F)C(F)(F)C(F)(F)C(F)(F)C(F)(F)C(F)(F)C(F)(F)C(F)(F)F
94	176676-70-3	Fluorotelomer alcohols (FTOHs)	13:2 FTOH	1-Pentadecanol, 3,3,4,4,5,5,6,6,7,7,8,8,9,9,10,10,11,11,12,12,13,13,14,14,15,15,15-heptacosafluoro-	YES			DTXSID20895531	DTXCID901325046	2-(Perfluorotridecanyl)ethanol	176676-70-3	Single Compound	OCCC(F)(F)C(F)(F)C(F)(F)C(F)(F)C(F)(F)C(F)(F)C(F)(F)C(F)(F)C(F)(F)C(F)(F)C(F)(F)C(F)(F)C(F)(F)F
95	39239-77-5	Fluorotelomer alcohols (FTOHs)	12:2 FTOH	1-Tetradecanol, 3,3,4,4,5,5,6,6,7,7,8,8,9,9,10,10,11,11,12,12,13,13,14,14,14-pentacosafluoro-	YES			DTXSID3068170	DTXCID3039616	2-(Perfluorododecyl)ethanol	39239-77-5	Single Compound	OCCC(F)(F)C(F)(F)C(F)(F)C(F)(F)C(F)(F)C(F)(F)C(F)(F)C(F)(F)C(F)(F)C(F)(F)C(F)(F)C(F)(F)F
96	1545-59-1	Fluorotelomer alcohols (FTOHs)	11:2 FTOH	1-Tridecanol, 3,3,4,4,5,5,6,6,7,7,8,8,9,9,10,10,11,11,12,12,13,13,13-tricosafluoro-	YES			DTXSID10551730	DTXCID00502514	2-(Perfluoroundecanyl)ethanol	1545-59-1	Single Compound	OCCC(F)(F)C(F)(F)C(F)(F)C(F)(F)C(F)(F)C(F)(F)C(F)(F)C(F)(F)C(F)(F)C(F)(F)C(F)(F)F
97	865-86-1	Fluorotelomer alcohols (FTOHs)	10:2 FTOH	1-Dodecanol, 3,3,4,4,5,5,6,6,7,7,8,8,9,9,10,10,11,11,12,12,12-heneicosafluoro-	YES			DTXSID2029905	DTXCID709905	10:2 Fluorotelomer alcohol	865-86-1	Single Compound	OCCC(F)(F)C(F)(F)C(F)(F)C(F)(F)C(F)(F)C(F)(F)C(F)(F)C(F)(F)C(F)(F)C(F)(F)F
98	87017-97-8	Fluorotelomer alcohols (FTOHs)	9:2 FTOH	1-Undecanol, 3,3,4,4,5,5,6,6,7,7,8,8,9,9,10,10,11,11,11-nonadecafluoro-	YES			DTXSID00551729	DTXCID40502513	9:2 Fluorotelomer alcohol	87017-97-8	Single Compound	OCCC(F)(F)C(F)(F)C(F)(F)C(F)(F)C(F)(F)C(F)(F)C(F)(F)C(F)(F)C(F)(F)F
99	678-39-7	Fluorotelomer alcohols (FTOHs)	8:2 FTOH	1-Decanol, 3,3,4,4,5,5,6,6,7,7,8,8,9,9,10,10,10-heptadecafluoro-	YES			DTXSID7029904	DTXCID309904	Fluorotelomer alcohol 8:2	678-39-7	Single Compound	OCCC(F)(F)C(F)(F)C(F)(F)C(F)(F)C(F)(F)C(F)(F)C(F)(F)C(F)(F)F
100	70887-94-4	Fluorotelomer saturated and non-saturated acids (FTCAs and FTUCAs)	10:2 FTUCA	2-Dodecenoic acid, 3,4,4,5,5,6,6,7,7,8,8,9,9,10,10,11,11,12,12,12-eicosafluoro-	YES			DTXSID70895723	DTXCID301325236	2H-Perfluoro-2-dodecenoate	70887-94-4	Mixture of Stereoisomers	OC(=O)C=C(F)C(F)(F)C(F)(F)C(F)(F)C(F)(F)C(F)(F)C(F)(F)C(F)(F)C(F)(F)C(F)(F)F
101	53826-13-4	Fluorotelomer saturated and non-saturated acids (FTCAs and FTUCAs)	10:2 FTCA	Dodecanoic acid, 3,3,4,4,5,5,6,6,7,7,8,8,9,9,10,10,11,11,12,12,12-heneicosafluoro-	YES			DTXSID40892325	DTXCID601079480	2-(Perfluorodecyl)ethanoic acid	53826-13-4	Single Compound	OC(=O)CC(F)(F)C(F)(F)C(F)(F)C(F)(F)C(F)(F)C(F)(F)C(F)(F)C(F)(F)C(F)(F)C(F)(F)F
102	191852-87-6	Fluorotelomer saturated and non-saturated acids (FTCAs and FTUCAs)	9:2 FTCA	Undecanoic acid, 3,3,4,4,5,5,6,6,7,7,8,8,9,9,10,10,11,11,11-nonadecafluoro-	YES			DTXSID601033088	DTXCID301518120	9:2 Fluorotelomer carboxylic acid	191852-87-6	Single Compound	OC(=O)CC(F)(F)C(F)(F)C(F)(F)C(F)(F)C(F)(F)C(F)(F)C(F)(F)C(F)(F)C(F)(F)F
103	70887-84-2	Fluorotelomer saturated and non-saturated acids (FTCAs and FTUCAs)	8:2 FTUCA	2-Decenoic acid, 3,4,4,5,5,6,6,7,7,8,8,9,9,10,10,10-hexadecafluoro-	YES			DTXSID60825615	DTXCID80776357	2H-Perfluoro-2-decenoic acid	70887-84-2	Mixture of Stereoisomers	OC(=O)C=C(F)C(F)(F)C(F)(F)C(F)(F)C(F)(F)C(F)(F)C(F)(F)C(F)(F)F
104	27854-31-5	Fluorotelomer saturated and non-saturated acids (FTCAs and FTUCAs)	8:2 FTCA	Decanoic acid, 3,3,4,4,5,5,6,6,7,7,8,8,9,9,10,10,10-heptadecafluoro-	YES			DTXSID50451109	DTXCID70401929	2-(Perfluorooctyl)ethanoic acid	27854-31-5	Single Compound	OC(=O)CC(F)(F)C(F)(F)C(F)(F)C(F)(F)C(F)(F)C(F)(F)C(F)(F)C(F)(F)F
105	54009-73-3	Fluorotelomer phosphate esters (PAPs)		1,2-Undecanediol, 4,4,5,5,6,6,7,7,8,8,9,9,10,11,11,11-hexa decafluoro-10-(trifluoromethyl)-, 1-(dihydrogen phosphate)	YES			DTXSID20880462	DTXCID301021894	(Perfluoro-7-methyloctyl)-2-hydroxypropyl dihydrogen phosphate	54009-73-3	Mixture of Stereoisomers	OC(COP(O)(O)=O)CC(F)(F)C(F)(F)C(F)(F)C(F)(F)C(F)(F)C(F)(F)C(F)(C(F)(F)F)C(F)(F)F
106	63295-27-2	Fluorotelomer phosphate esters (PAPs)		1,2-Tridecanediol, 4,4,5,5,6,6,7,7,8,8,9,9,10,10,11,11,12,13,13,13-eicosafluoro-12-(trifluoromethyl)-, 1-(dihydrogen phosphate)	YES			DTXSID20880528	DTXCID201021934	3-(Perfluoro-9-methyldecyl)-2-hydroxypropyl dihydrogen phosphate	63295-27-2	Mixture of Stereoisomers	OC(COP(O)(O)=O)CC(F)(F)C(F)(F)C(F)(F)C(F)(F)C(F)(F)C(F)(F)C(F)(F)C(F)(F)C(F)(C(F)(F)F)C(F)(F)F
107	63295-28-3	Fluorotelomer phosphate esters (PAPs)		1,2-Pentadecanediol, 4,4,5,5,6,6,7,7,8,8,9,9,10,10,11,11,12,12,13,13,14,15,15,15-tetracosafluoro-14-(trifluoromethyl)-, 1-(dihydrogen phosphate)	YES			DTXSID80880529	DTXCID901021935	3-(Perfluoro(11-methyldodecyl))-2-hydroxypropyl dihydrogen phosphate	63295-28-3	Mixture of Stereoisomers	OC(COP(O)(O)=O)CC(F)(F)C(F)(F)C(F)(F)C(F)(F)C(F)(F)C(F)(F)C(F)(F)C(F)(F)C(F)(F)C(F)(F)C(F)(C(F)(F)F)C(F)(F)F
108	63295-29-4	Fluorotelomer phosphate esters (PAPs)		1,2-Heptadecanediol, 4,4,5,5,6,6,7,7,8,8,9,9,10,10,11,11,12,12,13,13,14,14,15,15,16,17,17,17-octacosafluoro-16-(trifluoromethyl)-, 1-(dihydrogen phosphate)	YES			DTXSID50880531	DTXCID601021936	3-(Perfluoro(13-methyltetradecyl))-2-hydroxypropyl dihydrogen phosphate	63295-29-4	Mixture of Stereoisomers	OC(COP(O)(O)=O)CC(F)(F)C(F)(F)C(F)(F)C(F)(F)C(F)(F)C(F)(F)C(F)(F)C(F)(F)C(F)(F)C(F)(F)C(F)(F)C(F)(F)C(F)(C(F)(F)F)C(F)(F)F
109	63295-18-1	Fluorotelomer phosphate esters (PAPs)		1,2-Undecanediol, 4,4,5,5,6,6,7,7,8,8,9,9,10,11,11,11-hexa decafluoro-10-(trifluoromethyl)-, 1-(dihydrogen phosphate), diammonium salt	YES			DTXSID60880527	DTXCID501021933	Diammonium 3-(perfluoro-7-methyloctyl)-2-hydroxypropyl phosphate	63295-18-1	Mixture of Stereoisomers	[NH4+].[NH4+].OC(COP([O-])([O-])=O)CC(F)(F)C(F)(F)C(F)(F)C(F)(F)C(F)(F)C(F)(F)C(F)(C(F)(F)F)C(F)(F)F
110	63295-19-2	Fluorotelomer phosphate esters (PAPs)		1,2-Undecanediol, 4,4,5,5,6,6,7,7,8,8,9,9,10,11,11,11-hexa decafluoro-10-(trifluoromethyl)-, 1-(dihydrogen phosphate), compd. with 2,2′-iminobis[ethanol] (1:2)	YES			DTXSID201044061	DTXCID801764752	(Perfluoro-7-methyloctyl)-2-hydroxypropyl dihydrogen phosphate, compd. with 2,2′-iminobis[ethanol] (1:2)	63295-19-2	Mixture of Stereoisomers	OCCNCCO.OCCNCCO.OC(COP(O)(O)=O)CC(F)(F)C(F)(F)C(F)(F)C(F)(F)C(F)(F)C(F)(F)C(F)(C(F)(F)F)C(F)(F)F
111	63295-23-8	Fluorotelomer phosphate esters (PAPs)		2-Undecanol, 4,4,5,5,6,6,7,7,8,8,9,9,10,11,11,11-hexadecafluoro-10-(trifluoromethyl)-, dihydrogen phosphate, diammonium salt	YES			DTXSID201033355	DTXCID301518332	Diammonium 2-(perfluoro-7-methyloctyl)1-methylethanol phosphate	63295-23-8	Single Compound	[NH4+].[NH4+].CC(CC(F)(F)C(F)(F)C(F)(F)C(F)(F)C(F)(F)C(F)(F)C(F)(C(F)(F)F)C(F)(F)F)OP([O-])([O-])=O
112	63295-24-9	Fluorotelomer phosphate esters (PAPs)		Acetic acid, 2-[[3,3,4,4,5,5,6,6,7,7,8,8,9,10,10,10-hexadeca fluoro-1-[(phosphonooxy)methyl]-9-(trifluoromethyl) decyl]oxy]-, ammonium salt (1:2)	YES			DTXSID301033358	DTXCID701518334	Diammonium 2‐{[3-(perfluoro‐7‐methyloctyl)-1‐(phosphonatooxy)propan‐2‐yl]oxy}acetic acid	63295-24-9	Single Compound	[NH4+].[NH4+].OC(=O)COC(COP([O-])([O-])=O)CC(F)(F)C(F)(F)C(F)(F)C(F)(F)C(F)(F)C(F)(F)C(F)(C(F)(F)F)C(F)(F)F
113	63295-22-7	Fluorotelomer phosphate esters (PAPs)		1-Undecanol, 2-chloro-4,4,5,5,6,6,7,7,8,8,9,9,10,11,11,11-hexadecafluoro-10-(trifluoromethyl)-, dihydrogen phosphate	YES			DTXSID801033353	DTXCID601518331	2-Chloro-3-(perfluoro-7-methyl-1-octyl)propanol dihydrogen phosphate	63295-22-7	Single Compound	OP(O)(=O)OCC(Cl)CC(F)(F)C(F)(F)C(F)(F)C(F)(F)C(F)(F)C(F)(F)C(F)(C(F)(F)F)C(F)(F)F
114	94158-70-0	Fluorotelomer phosphate esters (PAPs)		1,2-Tridecanediol, 4,4,5,5,6,6,7,7,8,8,9,9,10,10,11,11,12,12,13,13,13-heneicosafluoro-, 1-(dihydrogen phosphate)	YES			DTXSID90881143	DTXCID701022432	3-(Perfluorodecyl)-2-hydroxypropyl dihydrogen phosphate	94158-70-0	Mixture of Stereoisomers	OC(COP(O)(O)=O)CC(F)(F)C(F)(F)C(F)(F)C(F)(F)C(F)(F)C(F)(F)C(F)(F)C(F)(F)C(F)(F)C(F)(F)F
115	94200-46-1	Fluorotelomer phosphate esters (PAPs)		1,2-Tridecanediol, 4,4,5,5,6,6,7,7,8,8,9,9,10,10,11,11,12,12,13,13,13-heneicosafluoro-, 1-(dihydrogen phosphate), diammonium salt	YES			DTXSID40881173	DTXCID801022459	Diammonium 3-(perfluorodecyl)-2-hydroxypropyl dihydrogen phosphate	94200-46-1	Mixture of Stereoisomers	[NH4+].[NH4+].OC(COP([O-])([O-])=O)CC(F)(F)C(F)(F)C(F)(F)C(F)(F)C(F)(F)C(F)(F)C(F)(F)C(F)(F)C(F)(F)C(F)(F)F
116	94200-47-2	Fluorotelomer phosphate esters (PAPs)		1,2-Pentadecanediol, 4,4,5,5,6,6,7,7,8,8,9,9,10,10,11,11,12,12,13,13,14,14,15,15,15-pentacosafluoro-, 1-(dihydrogen phosphate), diammonium salt	YES			DTXSID00881174	DTXCID101022460	Diammonium 3-(perfluorododecyl)-2-hydroxypropyl dihydrogen phosphate	94200-47-2	Mixture of Stereoisomers	[NH4+].[NH4+].OC(COP([O-])([O-])=O)CC(F)(F)C(F)(F)C(F)(F)C(F)(F)C(F)(F)C(F)(F)C(F)(F)C(F)(F)C(F)(F)C(F)(F)C(F)(F)C(F)(F)F
117	94200-48-3	Fluorotelomer phosphate esters (PAPs)		1,2-Heptadecanediol, 4,4,5,5,6,6,7,7,8,8,9,9,10,10,11,11,12,12,13,13,14,14,15,15,16,16,17,17,17-nonacosafluoro-, 1-(dihydrogen phosphate), diammonium salt	YES			DTXSID60881175	DTXCID801022461	Diammonium 3-(perfluorotetradecyl)-2-hydroxypropyl dihydrogen phosphate	94200-48-3	Mixture of Stereoisomers	[NH4+].[NH4+].OC(COP([O-])([O-])=O)CC(F)(F)C(F)(F)C(F)(F)C(F)(F)C(F)(F)C(F)(F)C(F)(F)C(F)(F)C(F)(F)C(F)(F)C(F)(F)C(F)(F)C(F)(F)C(F)(F)F
118	94200-50-7	Fluorotelomer phosphate esters (PAPs)		1,2-Tridecanediol, 4,4,5,5,6,6,7,7,8,8,9,9,10,10,11,11,12,13,13,13-eicosafluoro-12-(trifluoromethyl)-, 1-(dihydrogen phosphate), diammonium salt	YES			DTXSID80881177	DTXCID201022463	Diammonium 3-(perfluoro-9-methyldecyl)-2-hydroxypropyl dihydrogen phosphate	94200-50-7	Mixture of Stereoisomers	[NH4+].[NH4+].OC(COP([O-])([O-])=O)CC(F)(F)C(F)(F)C(F)(F)C(F)(F)C(F)(F)C(F)(F)C(F)(F)C(F)(F)C(F)(C(F)(F)F)C(F)(F)F
119	94200-51-8	Fluorotelomer phosphate esters (PAPs)		1,2-Pentadecanediol, 4,4,5,5,6,6,7,7,8,8,9,9,10,10,11,11,12,12,13,13,14,15,15,15-tetracosafluoro-14-(trifluoromethyl)-, 1-(dihydrogen phosphate), diammonium salt	YES			DTXSID30881182	DTXCID001022467	Diammonium 3-(perfluoro-11-methyldodecyl)-2-hydroxypropyl dihydrogen phosphate	94200-51-8	Mixture of Stereoisomers	[NH4+].[NH4+].OC(COP([O-])([O-])=O)CC(F)(F)C(F)(F)C(F)(F)C(F)(F)C(F)(F)C(F)(F)C(F)(F)C(F)(F)C(F)(F)C(F)(F)C(F)(C(F)(F)F)C(F)(F)F
120	94200-52-9	Fluorotelomer phosphate esters (PAPs)		1,2-Heptadecanediol, 4,4,5,5,6,6,7,7,8,8,9,9,10,10,11,11,12,12,13,13,14,14,15,15,16,17,17,17-octacosafluoro-16-(trifluoromethyl)-, 1-(dihydrogen phosphate), diammonium salt	YES			DTXSID90881183	DTXCID701022468	Diammonium 3-(perfluoro-13-methyltetradecyl)-2-hydroxypropyl dihydrogen phosphate	94200-52-9	Mixture of Stereoisomers	[NH4+].[NH4+].OC(COP([O-])([O-])=O)CC(F)(F)C(F)(F)C(F)(F)C(F)(F)C(F)(F)C(F)(F)C(F)(F)C(F)(F)C(F)(F)C(F)(F)C(F)(F)C(F)(F)C(F)(C(F)(F)F)C(F)(F)F
121	57678-03-2	Fluorotelomer phosphate esters (PAPs)	8:2 monoPAP	8:2 Fluorotelomer phosphate monoester	YES			DTXSID60874027	DTXCID501012166	2-(Perfluorooctyl)ethyl dihydrogen phosphate	57678-03-2	Single Compound	OP(O)(=O)OCCC(F)(F)C(F)(F)C(F)(F)C(F)(F)C(F)(F)C(F)(F)C(F)(F)C(F)(F)F
122	678-41-1	Fluorotelomer phosphate esters (PAPs)	8:2 diPAP	8:2 Fluorotelomer phosphate diester	YES			DTXSID90218051	DTXCID10140542	Bis(2-(perfluorooctyl)ethyl) hydrogen phosphate	678-41-1	Single Compound	OP(=O)(OCCC(F)(F)C(F)(F)C(F)(F)C(F)(F)C(F)(F)C(F)(F)C(F)(F)C(F)(F)F)OCCC(F)(F)C(F)(F)C(F)(F)C(F)(F)C(F)(F)C(F)(F)C(F)(F)C(F)(F)F
123	93857-44-4	Fluorotelomer phosphate esters (PAPs)		1-Decanol, 3,3,4,4,5,5,6,6,7,7,8,8,9,9,10,10,10-heptadecafluoro-, dihydrogen phosphate, diammonium salt	YES			DTXSID90881067	DTXCID201022382	8:2 Fluorotelomer diammonium phosphate	93857-44-4	Single Compound	[NH4+].[NH4+].[O-]P([O-])(=O)OCCC(F)(F)C(F)(F)C(F)(F)C(F)(F)C(F)(F)C(F)(F)C(F)(F)C(F)(F)F
124	93857-45-5	Fluorotelomer phosphate esters (PAPs)		1-Dodecanol, 3,3,4,4,5,5,6,6,7,7,8,8,9,9,10,10,11,11,12,12,12-heneicosafluoro-, 1-(dihydrogen phosphate), ammonium salt (1:2)	YES			DTXSID10881069	DTXCID901022383	10:2 Fluorotelomer diammonium dihydrogen phosphate	93857-45-5	Single Compound	[NH4+].[NH4+].[O-]P([O-])(=O)OCCC(F)(F)C(F)(F)C(F)(F)C(F)(F)C(F)(F)C(F)(F)C(F)(F)C(F)(F)C(F)(F)C(F)(F)F
125	57678-05-4	Fluorotelomer phosphate esters (PAPs)	10:2 monoPAP	1-Dodecanol, 3,3,4,4,5,5,6,6,7,7,8,8,9,9,10,10,11,11,12,12,12-heneicosafluoro-, 1-(dihydrogen phosphate)	YES			DTXSID20206380	DTXCID20128871	10:2 Fluorotelomer dihydrogen phosphate	57678-05-4	Single Compound	OP(O)(=O)OCCC(F)(F)C(F)(F)C(F)(F)C(F)(F)C(F)(F)C(F)(F)C(F)(F)C(F)(F)C(F)(F)C(F)(F)F
126	1895-26-7	Fluorotelomer phosphate esters (PAPs)	10:2 diPAP	1-Dodecanol, 3,3,4,4,5,5,6,6,7,7,8,8,9,9,10,10,11,11,12,12,12-heneicosafluoro-, 1,1'-(hydrogen phosphate)	YES			DTXSID30172360	DTXCID6094851	10:2 Fluorotelomer phosphate diester	1895-26-7	Single Compound	OP(=O)(OCCC(F)(F)C(F)(F)C(F)(F)C(F)(F)C(F)(F)C(F)(F)C(F)(F)C(F)(F)C(F)(F)C(F)(F)F)OCCC(F)(F)C(F)(F)C(F)(F)C(F)(F)C(F)(F)C(F)(F)C(F)(F)C(F)(F)C(F)(F)C(F)(F)F
127	90179-37-6	Fluorotelomer phosphate esters (PAPs)		2-Undecanol, 4,4,5,5,6,6,7,7,8,8,9,9,10,10,11,11,11-heptadecafluoro-, dihydrogen phosphate, potassium salt	YES			DTXSID401034066		Potassium (perfluorooctyl)propan‐2‐yl hydrogen phosphate (x:1)	90179-37-6	Mixture/Formulation
128	98005-85-7	Fluorotelomer phosphate esters (PAPs)		Diphosphoric acid, mono(3,3,4,4,5,5,6,6,7,7,8,8, 9,9,10,10,10-heptadecafluorodecyl) ester, compd. with 2,2′,2′′-nitrilotris[ethanol] (1:3)	YES			DTXSID101044068	DTXCID201526510	Diphosphoric acid, mono(perfluorooctyl)ethyl ester, compd. with 2,2′,2′′-nitrilotris[ethanol] (1:3)	98005-85-7	Single Compound	OCCN(CCO)CCO.OCCN(CCO)CCO.OCCN(CCO)CCO.OP(O)(=O)OP(O)(=O)OCCC(F)(F)C(F)(F)C(F)(F)C(F)(F)C(F)(F)C(F)(F)C(F)(F)C(F)(F)F
129	98005-84-6	Fluorotelomer phosphate esters (PAPs)		Diphosphoric acid, mono(3,3,4,4,5,5,6,6,7,7,8,8, 9,9,10,10,10-heptadecafluorodecyl) ester, compd. with 2-aminoethanol (1:3)	YES			DTXSID401044067	DTXCID901526509	Diphosphoric acid, mono(perfluorooctyl)ethyl ester, compd. with 2-aminoethanol (1:3)	98005-84-6	Single Compound	NCCO.NCCO.NCCO.OP(O)(=O)OP(O)(=O)OCCC(F)(F)C(F)(F)C(F)(F)C(F)(F)C(F)(F)C(F)(F)C(F)(F)C(F)(F)F
130	1158182-60-5	Fluorotelomer phosphate esters (PAPs)	8:2/10:2 diPAP	Phosphoric acid, mono(3,3,4,4,5,5,6,6,7,7,8,8,9,9,10,10,11,11,12,12,12-heneicosafluoro dodecyl) mono(3,3,4,4,5,5,6,6,7,7,8,8,9,9,10,10,10-heptadecafluorodecyl) ester	YES			DTXSID60873414	DTXCID801011705	(Perfluorodecyl)ethyl (perfluorooctyl)ethyl hydrogen phosphate	1158182-60-5	Single Compound	OP(=O)(OCCC(F)(F)C(F)(F)C(F)(F)C(F)(F)C(F)(F)C(F)(F)C(F)(F)C(F)(F)F)OCCC(F)(F)C(F)(F)C(F)(F)C(F)(F)C(F)(F)C(F)(F)C(F)(F)C(F)(F)C(F)(F)C(F)(F)F
131	1578186-42-1	Fluorotelomer phosphate esters (PAPs)	8:2/12:2 diPAP	Phosphoric acid, mono(3,3,4,4,5,5,6,6,7,7,8,8, 9,9,10,10,10-heptadecafluorodecyl) mono(3,3,4, 4,5,5,6,6,7,7,8,8,9,9,10,10,11,11,12,12,13,13,14,14,14-pentacosafluorotetradecyl) ester	YES			DTXSID201032919	DTXCID601517945	(Perfluorooctyl)ethyl (perfluorododecyl)ethyl hydrogen phosphate	1578186-42-1	Single Compound	OP(=O)(OCCC(F)(F)C(F)(F)C(F)(F)C(F)(F)C(F)(F)C(F)(F)C(F)(F)C(F)(F)F)OCCC(F)(F)C(F)(F)C(F)(F)C(F)(F)C(F)(F)C(F)(F)C(F)(F)C(F)(F)C(F)(F)C(F)(F)C(F)(F)C(F)(F)F
132	1158182-61-6	Fluorotelomer phosphate esters (PAPs)	10:2/12:2 diPAP	Phosphoric acid, mono(3,3,4,4,5,5,6,6,7,7,8,8,9,9,10,10,11,11,12,12,12-heneicosafluorododecyl) mono(3,3,4,4,5,5,6,6,7,7,8,8,9,9,10,10,11,11,12,12,13,13,14,14,14-pentacosafluorotetradecyl) ester	YES			DTXSID501026545	DTXCID501510710	10:2/12:2 Fluorotelomer phosphate diester	1158182-61-6	Single Compound	OP(=O)(OCCC(F)(F)C(F)(F)C(F)(F)C(F)(F)C(F)(F)C(F)(F)C(F)(F)C(F)(F)C(F)(F)C(F)(F)F)OCCC(F)(F)C(F)(F)C(F)(F)C(F)(F)C(F)(F)C(F)(F)C(F)(F)C(F)(F)C(F)(F)C(F)(F)C(F)(F)C(F)(F)F
133	93776-20-6	Fluorotelomer phosphate esters (PAPs)	Ammonium salt of 8:2 diPAP	Ammonium bi(3,3,4,4,5,5,6,6,7,7,8,8,9,9,10,10,10-heptadecafluorodecyl) phosphate	YES			DTXSID80239593	DTXCID30162084	Bis[2-(perfluorooctyl)ethyl] phosphate ammonium salt	93776-20-6	Single Compound	[NH4+].[O-]P(=O)(OCCC(F)(F)C(F)(F)C(F)(F)C(F)(F)C(F)(F)C(F)(F)C(F)(F)C(F)(F)F)OCCC(F)(F)C(F)(F)C(F)(F)C(F)(F)C(F)(F)C(F)(F)C(F)(F)C(F)(F)F
134	93776-21-7	Fluorotelomer phosphate esters (PAPs)	Ammonium salt of 10:2 diPAP	Ammonium bis(3,3,4,4,5,5,6,6,7,7,8,8,9,9,10,10,11,11,12,12,12-heneicosafluorodecyl) phosphate	YES			DTXSID40239594	DTXCID90162085	Ammonium bis((perfluorodecyl)ethyl) phosphate	93776-21-7	Single Compound	[NH4+].[O-]P(=O)(OCCC(F)(F)C(F)(F)C(F)(F)C(F)(F)C(F)(F)C(F)(F)C(F)(F)C(F)(F)C(F)(F)C(F)(F)F)OCCC(F)(F)C(F)(F)C(F)(F)C(F)(F)C(F)(F)C(F)(F)C(F)(F)C(F)(F)C(F)(F)C(F)(F)F
135	63295-20-5	Fluorotelomer phosphate esters (PAPs)		1,2-Undecanediol, 4,4,5,5,6,6,7,7,8,8,9,9,10,11,11,11-hexadecafluoro-10-(trifluoromethyl)-, 1,1-(hydrogen phosphate)	YES			DTXSID70881368	DTXCID101022622	Bis[(perfluoro-7-methyloctyl)-2-hydroxypropyl] hydrogen phosphate	63295-20-5	Mixture of Stereoisomers	OC(COP(O)(=O)OCC(O)CC(F)(F)C(F)(F)C(F)(F)C(F)(F)C(F)(F)C(F)(F)C(F)(C(F)(F)F)C(F)(F)F)CC(F)(F)C(F)(F)C(F)(F)C(F)(F)C(F)(F)C(F)(F)C(F)(C(F)(F)F)C(F)(F)F
136	63295-26-1	Fluorotelomer phosphate esters (PAPs)		1-Undecanol, 2-chloro-4,4,5,5,6,6,7,7,8,8,9,9,10,11,11,11-hexadecafluoro-10-(trifluoromethyl)-, hydrogen phosphate	YES			DTXSID101033364	DTXCID401518335	Bis[3-(perfluoro-7-methyloctyl]-2-chloropropanyl) hydrogen phosphate	63295-26-1	Single Compound	OP(=O)(OCC(Cl)CC(F)(F)C(F)(F)C(F)(F)C(F)(F)C(F)(F)C(F)(F)C(F)(C(F)(F)F)C(F)(F)F)OCC(Cl)CC(F)(F)C(F)(F)C(F)(F)C(F)(F)C(F)(F)C(F)(F)C(F)(C(F)(F)F)C(F)(F)F
137	2343-53-5	Fluorotelomer phosphate esters (PAPs)		1-Nonadecanol, 12,12,13,13,14,14,15,15,16,16,17,17,18,18,19,19,19-heptadecafluoro-, dihydrogen phosphate	YES			DTXSID401032646	DTXCID301517653	Bis[(perfluorooctyl)undecyl] hydrogen phosphate	2343-53-5	Single Compound	OP(=O)(OCCCCCCCCCCCC(F)(F)C(F)(F)C(F)(F)C(F)(F)C(F)(F)C(F)(F)C(F)(F)C(F)(F)F)OCCCCCCCCCCCC(F)(F)C(F)(F)C(F)(F)C(F)(F)C(F)(F)C(F)(F)C(F)(F)C(F)(F)F
138	1578186-53-4	Fluorotelomer phosphate esters (PAPs)	6:2/6:2/8:2 triPAP	Phosphoric acid, 3,3,4,4,5,5,6,6,7,7,8,8,9,9,10,10,10-heptadecafluorodecyl bis(3,3,4,4,5,5,6,6, 7,7,8,8,8-tridecafluorooctyl) ester	YES			DTXSID401335066	DTXCID201764728	(Perfluorooctyl)ethyl bis((perfluorohexyl)ethyl) phosphate	1578186-53-4	Single Compound	FC(F)(F)C(F)(F)C(F)(F)C(F)(F)C(F)(F)C(F)(F)CCOP(=O)(OCCC(F)(F)C(F)(F)C(F)(F)C(F)(F)C(F)(F)C(F)(F)F)OCCC(F)(F)C(F)(F)C(F)(F)C(F)(F)C(F)(F)C(F)(F)C(F)(F)C(F)(F)F
139	1578186-56-7	Fluorotelomer phosphate esters (PAPs)	6:2/8:2/8:2 triPAP	Phosphoric acid, bis(3,3,4,4,5,5,6,6,7,7,8,8,9,9,10,10,10-heptadecafluorodecyl) 3,3,4,4,5,5,6,6,7,7,8,8,8-tridecafluorooctyl ester	YES			DTXSID801335070	DTXCID601764732	Bis((perfluorooctyl)ethyl) (perfluorohexyl)ethyl phosphate	1578186-56-7	Single Compound	FC(F)(F)C(F)(F)C(F)(F)C(F)(F)C(F)(F)C(F)(F)CCOP(=O)(OCCC(F)(F)C(F)(F)C(F)(F)C(F)(F)C(F)(F)C(F)(F)C(F)(F)C(F)(F)F)OCCC(F)(F)C(F)(F)C(F)(F)C(F)(F)C(F)(F)C(F)(F)C(F)(F)C(F)(F)F
140	1578186-64-7	Fluorotelomer phosphate esters (PAPs)	6:2/8:2/10:2 triPAP	Phosphoric acid, 3,3,4,4,5,5,6,6,7,7,8,8,9,9,10,10,11,11,12,12,12-heneicosafluorododecyl 3,3,4,4, 5,5,6,6,7,7,8,8,9,9,10,10,10-heptadecafluorodecyl 3,3,4,4,5,5,6,6,7,7,8,8,8-tridecafluorooctyl ester	YES			DTXSID201335072	DTXCID001764734	(Perfluorodecyl)ethyl (perfluorooctyl)ethyl (perfluorohexyl)ethyl phosphate	1578186-64-7	Single Compound	FC(F)(F)C(F)(F)C(F)(F)C(F)(F)C(F)(F)C(F)(F)CCOP(=O)(OCCC(F)(F)C(F)(F)C(F)(F)C(F)(F)C(F)(F)C(F)(F)C(F)(F)C(F)(F)F)OCCC(F)(F)C(F)(F)C(F)(F)C(F)(F)C(F)(F)C(F)(F)C(F)(F)C(F)(F)C(F)(F)C(F)(F)F
141	1578186-57-8	Fluorotelomer phosphate esters (PAPs)	6:2/6:2/10:2 triPAP	Phosphoric acid, 3,3,4,4,5,5,6,6,7,7,8,8,9,9,10,10,11,11,12,12,12-heneicosafluorododecylbis (3,3,4,4,5,5,6,6,7,7,8,8,8-tridecafluorooctyl) ester	YES			DTXSID901335073	DTXCID701764735	(Perfluorodecyl)ethyl bis((perfluorohexyl)ethyl) phosphate	1578186-57-8	Single Compound	FC(F)(F)C(F)(F)C(F)(F)C(F)(F)C(F)(F)C(F)(F)CCOP(=O)(OCCC(F)(F)C(F)(F)C(F)(F)C(F)(F)C(F)(F)C(F)(F)F)OCCC(F)(F)C(F)(F)C(F)(F)C(F)(F)C(F)(F)C(F)(F)C(F)(F)C(F)(F)C(F)(F)C(F)(F)F
142	149790-22-7	Fluorotelomer phosphate esters (PAPs)	8:2 triPAP	1-Decanol, 3,3,4,4,5,5,6,6,7,7,8,8,9,9,10,10,10-heptadecafluoro-, 1,1’,1’’-phosphate	YES			DTXSID30599058	DTXCID90549817	Tris[2-(perfluorooctyl)ethyl] phosphate	149790-22-7	Single Compound	FC(F)(F)C(F)(F)C(F)(F)C(F)(F)C(F)(F)C(F)(F)C(F)(F)C(F)(F)CCOP(=O)(OCCC(F)(F)C(F)(F)C(F)(F)C(F)(F)C(F)(F)C(F)(F)C(F)(F)C(F)(F)F)OCCC(F)(F)C(F)(F)C(F)(F)C(F)(F)C(F)(F)C(F)(F)C(F)(F)C(F)(F)F
143	441765-20-4	Fluorotelomer phosphate esters (PAPs)		1-Decanesulfonamide, 3,3,4,4,5,5,6,6,7,7,8,8,9, 9,10,10,10-heptadecafluoro-N-[3-(phosphorno oxy)propyl]-N-propyl-, sodium salt (1:2)	YES			DTXSID101032930	DTXCID901517956	Disodium N‐[3‐(phosphonatooxy)propyl]‐N‐propyl-(perfluorooctyl)ethylsulfonamide	441765-20-4	Single Compound	[Na+].[Na+].CCCN(CCCOP([O-])([O-])=O)S(=O)(=O)CCC(F)(F)C(F)(F)C(F)(F)C(F)(F)C(F)(F)C(F)(F)C(F)(F)C(F)(F)F
144	16083-78-6	Fluorotelomer acrylates and methacrylates (FTACs and FTMACs)		2-Propenoic acid, 4,4,5,5,6,6,7,7,8,8,9,9,10,10,11,11,12,12,13,13,14,14,15,15,16,17,17,17-octacosafluoro-2-hydroxy-16-(trifluoromethyl)heptadecyl ester	YES			DTXSID60880224	DTXCID501323636	3-(Perfluoro-13-methyl-tetradecyl)-2-hydroxypropyl acrylate	16083-78-6	Mixture of Stereoisomers	OC(COC(=O)C=C)CC(F)(F)C(F)(F)C(F)(F)C(F)(F)C(F)(F)C(F)(F)C(F)(F)C(F)(F)C(F)(F)C(F)(F)C(F)(F)C(F)(F)C(F)(C(F)(F)F)C(F)(F)F
145	4980-53-4	Fluorotelomer acrylates and methacrylates (FTACs and FTMACs)	14:2 FTMAC	2-Propenoic acid, 2-methyl-, 3,3,4,4,5,5,6,6,7,7,8,8,9,9,10,10,11,11,12,12,13,13,14,14,15,15,16,16,16-nonacosafluorohexadecyl ester	YES			DTXSID4063660	DTXCID6040745	(Perfluorotetradecyl)ethyl 2-methyl-2-propenoate	4980-53-4	Single Compound	CC(=C)C(=O)OCCC(F)(F)C(F)(F)C(F)(F)C(F)(F)C(F)(F)C(F)(F)C(F)(F)C(F)(F)C(F)(F)C(F)(F)C(F)(F)C(F)(F)C(F)(F)C(F)(F)F
146	6014-75-1	Fluorotelomer acrylates and methacrylates (FTACs and FTMACs)	12:2 FTMAC	2-Propenoic acid, 2-methyl-, 3,3,4,4,5,5,6,6,7,7,8,8,9,9,10,10,11,11,12,12,13,13,14,14,14-pentacosafluorotetradecyl ester	YES			DTXSID1064083	DTXCID8042763	(Perfluorododecyl)ethyl methacrylate	6014-75-1	Single Compound	CC(=C)C(=O)OCCC(F)(F)C(F)(F)C(F)(F)C(F)(F)C(F)(F)C(F)(F)C(F)(F)C(F)(F)C(F)(F)C(F)(F)C(F)(F)C(F)(F)F
147	16083-87-7	Fluorotelomer acrylates and methacrylates (FTACs and FTMACs)		2-Propenoic acid, 4,4,5,5,6,6,7,7,8,8,9,9,10,10,11,11,12,12,13,13,14,15,15,15-tetracosafluoro-2-hydroxy-14-(trifluoromethyl)pentadecyl ester	YES			DTXSID20880225	DTXCID901021804	3-(Perfluoro-11-methyldodecyl)-2-hydroxypropyl propenoate	16083-87-7	Mixture of Stereoisomers	OC(COC(=O)C=C)CC(F)(F)C(F)(F)C(F)(F)C(F)(F)C(F)(F)C(F)(F)C(F)(F)C(F)(F)C(F)(F)C(F)(F)C(F)(C(F)(F)F)C(F)(F)F
148	52956-82-8	Fluorotelomer acrylates and methacrylates (FTACs and FTMACs)		2-Propenoic acid, 3,3,4,4,5,5,6,6,7,7,8,8,9,9,10,10,11,11,12,12,13,14,14,14-tetracosafluoro-13-(trifluoromethyl)tetradecyl ester	YES			DTXSID10880456	DTXCID501021890	2-(Perfluoro-11-methyldodecyl)ethyl propenoate	52956-82-8	Single Compound	FC(F)(F)C(F)(C(F)(F)F)C(F)(F)C(F)(F)C(F)(F)C(F)(F)C(F)(F)C(F)(F)C(F)(F)C(F)(F)C(F)(F)C(F)(F)CCOC(=O)C=C
149	74256-14-7	Fluorotelomer acrylates and methacrylates (FTACs and FTMACs)		2-Propenoic acid, 2-methyl-, 3,3,4,4,5,5,6,6,7,7,8,8,9,9,10,10,11,12,12,12-eicosafluoro-11-(trifluoromethyl)dodecyl ester	YES			DTXSID80880968	DTXCID501022305	(Perfluoro-9-methyldecyl)ethyl methacrylate	74256-14-7	Single Compound	CC(=C)C(=O)OCCC(F)(F)C(F)(F)C(F)(F)C(F)(F)C(F)(F)C(F)(F)C(F)(F)C(F)(F)C(F)(C(F)(F)F)C(F)(F)F
150	74256-15-8	Fluorotelomer acrylates and methacrylates (FTACs and FTMACs)		2-Propenoic acid, 2-methyl-, 3,3,4,4,5,5,6,6,7,7,8,8,9,9,10,10,11,11,12,12,13,14,14,14-tetracosafluoro-13-(trifluoromethyl)tetradecyl ester	YES			DTXSID40880969	DTXCID201022306	(Perfluoro-11-methyldodecyl)ethyl methacrylate	74256-15-8	Single Compound	CC(=C)C(=O)OCCC(F)(F)C(F)(F)C(F)(F)C(F)(F)C(F)(F)C(F)(F)C(F)(F)C(F)(F)C(F)(F)C(F)(F)C(F)(C(F)(F)F)C(F)(F)F
151	17741-60-5	Fluorotelomer acrylates and methacrylates (FTACs and FTMACs)	10:2 FTAC	2-(Perfluorodecyl) ethyl acrylate	YES			DTXSID9037743	DTXCID7017743	2-(Perfluorodecyl)ethyl acrylate	17741-60-5	Single Compound	FC(F)(F)C(F)(F)C(F)(F)C(F)(F)C(F)(F)C(F)(F)C(F)(F)C(F)(F)C(F)(F)C(F)(F)CCOC(=O)C=C
152	2144-54-9	Fluorotelomer acrylates and methacrylates (FTACs and FTMACs)	10:2 FTMAC	2-(Perfluorodecyl) ethyl methacrylate	YES			DTXSID6062204	DTXCID9036480	10:2 Fluorotelomer methacrylate	2144-54-9	Single Compound	CC(=C)C(=O)OCCC(F)(F)C(F)(F)C(F)(F)C(F)(F)C(F)(F)C(F)(F)C(F)(F)C(F)(F)C(F)(F)C(F)(F)F
153	27905-45-9	Fluorotelomer acrylates and methacrylates (FTACs and FTMACs)	8:2 FTAC	8:2 Fluorotelomer acrylate	YES			DTXSID5067348	DTXCID9037747	2-(Perfluorooctyl)ethyl acrylate	27905-45-9	Single Compound	FC(F)(F)C(F)(F)C(F)(F)C(F)(F)C(F)(F)C(F)(F)C(F)(F)C(F)(F)CCOC(=O)C=C
154	1996-88-9	Fluorotelomer acrylates and methacrylates (FTACs and FTMACs)	8:2 FTMAC	8:2 Fluorotelomer methacrylate	YES			DTXSID8062101	DTXCID5036187	2-(Perfluorooctyl)ethyl methacrylate	1996-88-9	Single Compound	CC(=C)C(=O)OCCC(F)(F)C(F)(F)C(F)(F)C(F)(F)C(F)(F)C(F)(F)C(F)(F)C(F)(F)F
155	85631-54-5	Fluorotelomer acrylates and methacrylates (FTACs and FTMACs)	FTACs	2-​Propenoic acid, γ-​ω-​perfluoro-​C8-​14-​alkyl esters	YES			DTXSID60881291	Markush	Perfluoroalkylethyl acrylates (C6-C14)	85631-54-5	Mixture/Formulation
156	91615-22-4	Fluorotelomer acrylates and methacrylates (FTACs and FTMACs)		2-Propenoic acid, 3,3,4,4,5,5,6,6,7,7,8,8,9,9,10,10,11,11,12,12,13,13,14,14,15,16,16,16-octacosafluoro-15-(trifluoromethyl)hexadecyl ester	YES			DTXSID80238647	DTXCID30161138	((Perfluoro-13-methyltetradecyl)ethyl) acrylate	91615-22-4	Single Compound	FC(F)(F)C(F)(C(F)(F)F)C(F)(F)C(F)(F)C(F)(F)C(F)(F)C(F)(F)C(F)(F)C(F)(F)C(F)(F)C(F)(F)C(F)(F)C(F)(F)C(F)(F)CCOC(=O)C=C
157	94158-63-1	Fluorotelomer acrylates and methacrylates (FTACs and FTMACs)		2-Propenoic acid, 3,3,4,4,5,5,6,6,7,7,8,8,9,9,10,10,11,11,12,12,13,13,14,14,15,15,16,16,17,18,18,18-dotriacontafluoro-17-(trifluoromethyl)octadecyl ester	YES			DTXSID10240839	DTXCID90163330	(Perfluoro-15-methylhexadecyl)ethyl acrylate	94158-63-1	Single Compound	FC(F)(F)C(F)(C(F)(F)F)C(F)(F)C(F)(F)C(F)(F)C(F)(F)C(F)(F)C(F)(F)C(F)(F)C(F)(F)C(F)(F)C(F)(F)C(F)(F)C(F)(F)C(F)(F)C(F)(F)CCOC(=O)C=C
158	94158-64-2	Fluorotelomer acrylates and methacrylates (FTACs and FTMACs)		2-Propenoic acid, 2-methyl-, 3,3,4,4,5,5,6,6,7,7,8,8,9,9,10,10,11,11,12,12,13,13,14,14,15,16,16,16-octacosafluoro-15-(trifluoromethyl)hexadecyl ester	YES			DTXSID20240840	DTXCID50163331	((Perfluoro-13-methyltetradecyl)ethyl) methacrylate	94158-64-2	Single Compound	CC(=C)C(=O)OCCC(F)(F)C(F)(F)C(F)(F)C(F)(F)C(F)(F)C(F)(F)C(F)(F)C(F)(F)C(F)(F)C(F)(F)C(F)(F)C(F)(F)C(F)(C(F)(F)F)C(F)(F)F
159	94158-65-3	Fluorotelomer acrylates and methacrylates (FTACs and FTMACs)		2-Propenoic acid, 2-methyl-, 3,3,4,4,5,5,6,6,7,7,8,8,9,9,10,10,11,11,12,12,13,13,14,14,15,15,16,16,17,18,18,18-dotriacontafluoro-17-(trifluoromethyl)octadecyl ester	YES			DTXSID80240841	DTXCID10163332	(Perfluoro-15-methylhexadecyl)ethyl methacrylate	94158-65-3	Single Compound	CC(=C)C(=O)OCCC(F)(F)C(F)(F)C(F)(F)C(F)(F)C(F)(F)C(F)(F)C(F)(F)C(F)(F)C(F)(F)C(F)(F)C(F)(F)C(F)(F)C(F)(F)C(F)(F)C(F)(C(F)(F)F)C(F)(F)F
160	146955-29-5	Fluorotelomer acrylates and methacrylates (FTACs and FTMACs)		2-Propenoic acid, 3,3,4,4,5,5,6,6,7,7,8,8,9,9,10,10,10-heptadecafluoro-1-(hydroxymethyl)decyl ester	YES			DTXSID501032768	DTXCID801517791	2-(Perfluorooctyl)-1-(hydroxymethyl)ethyl 2-propenoate	146955-29-5	Mixture of Stereoisomers	OCC(CC(F)(F)C(F)(F)C(F)(F)C(F)(F)C(F)(F)C(F)(F)C(F)(F)C(F)(F)F)OC(=O)C=C
161	76962-34-0	Fluorotelomer acrylates and methacrylates (FTACs and FTMACs)		2-Propenoic acid, 4,4,5,5,6,6,7,7,8,8,9,9,10,10,11,11,11-heptadecafluoro-2-hydroxyundecyl ester	YES			DTXSID50379975	DTXCID80331001	3-(Perfluorooctyl)-2-hydroxypropyl acrylate	76962-34-0	Single Compound	OC(COC(=O)C=C)CC(F)(F)C(F)(F)C(F)(F)C(F)(F)C(F)(F)C(F)(F)C(F)(F)C(F)(F)F
162	93776-12-6	Other fluorotelomer-based non-polymers		1-​Propanaminium, N-​(2-​carboxyethyl)​-​N,​N- ​dimethyl-​3-​[(4,​4,​5,​5,​6,​6,​7,​7,​8,​8,​9,​9,​10,​10,​11,​11,​12,​12,​13,​13,​14,​14,​15,​15,​15-​pentacosafluoro-​2-​hydroxypentadecyl)​ amino]​-​, inner salt	YES			DTXSID80881016	DTXCID601022334	(2-Carboxylatoethyl)dimethyl(((perfluorododecyl)-2-hydroxypropyl)amino)propylammonium	93776-12-6	Mixture of Stereoisomers	[H]N(CCC[N+]([H])(CC)CCC([O-])=O)CC(O)CC(F)(F)C(F)(F)C(F)(F)C(F)(F)C(F)(F)C(F)(F)C(F)(F)C(F)(F)C(F)(F)C(F)(F)C(F)(F)C(F)(F)F
163	93776-13-7	Other fluorotelomer-based non-polymers		1-​Propanaminium, N- ​(2-​carboxyethyl)​-​3-​[(4,​4,​5,​5,​6,​6,​7,​7,​8,​8,​9,​9,​10,​10,​11,​11,​12,​12,​13,​13,​13-​heneicosafluoro-​2-​hydroxytridecyl)​amino]​ -​N,​N-​dimethyl-​, inner salt	YES			DTXSID10881029	DTXCID001022348	(2-Carboxylatoethyl)-3-((perfluorodecyl)-2-hydroxypropyl)aminopropyldimethylammonium	93776-13-7	Mixture of Stereoisomers	[H]N(CCC[N+](C)(C)CCC([O-])=O)CC(O)CC(F)(F)C(F)(F)C(F)(F)C(F)(F)C(F)(F)C(F)(F)C(F)(F)C(F)(F)C(F)(F)C(F)(F)F
164	93776-15-9	Other fluorotelomer-based non-polymers		1-​Propanaminium, N-​(2-​carboxyethyl)​-​N,​N- ​dimethyl-​3-​[[4,​4,​5,​5,​6,​6,​7,​7,​8,​8,​9,​9,​10,​10,​11,​11,​12,​12,​13,​13,​14,​15,​15,​15-​tetracosafluoro-​2-​hydroxy-​14-​ (trifluoromethyl)​pentadecyl]​amino]​-​, inner salt	YES			DTXSID80881031	DTXCID001022350	(2-Carboxylatoethyl)-3-((perfluoro-11-methyldodecyl)-2-hydroxypropyl)aminopropyldimethylammonium	93776-15-9	Mixture of Stereoisomers	C[N+](C)(CCCNCC(O)CC(F)(F)C(F)(F)C(F)(F)C(F)(F)C(F)(F)C(F)(F)C(F)(F)C(F)(F)C(F)(F)C(F)(F)C(F)(C(F)(F)F)C(F)(F)F)CCC([O-])=O
165	94159-83-8	Other fluorotelomer-based non-polymers		2-Tridecanol, 1-[[3-(dimethylamino)propyl]amino]-4,4,5,5,6,6,7,7,8,8,9,9,10,10,11,11,12,13,13,13-eicosafluoro-12-(trifluoromethyl)-	YES			DTXSID20881156	DTXCID601022441	1-((3-(Dimethylamino)propyl)amino)-(3-(perfluoro-9-methyldecyl))propanol	94159-83-8	Mixture of Stereoisomers	CN(C)CCCNC(O)CCC(F)(F)C(F)(F)C(F)(F)C(F)(F)C(F)(F)C(F)(F)C(F)(F)C(F)(F)C(F)(C(F)(F)F)C(F)(F)F
166	94159-79-2	Other fluorotelomer-based non-polymers		2-Pentadecanol, 1-[[3-(dimethylamino)propyl]amino]-4,4,5,5,6,6,7,7,8,8,9,9,10,10,11,11,12,12,13,13,14,14,15,15,15-pentacosafluoro-	YES			DTXSID60881150	DTXCID201022437	1-((3-(Dimethylamino)propyl)amino)-(3-(perfluorododecyl))propan-2-ol	94159-79-2	Mixture of Stereoisomers	CN(C)CCCNCC(O)CC(F)(F)C(F)(F)C(F)(F)C(F)(F)C(F)(F)C(F)(F)C(F)(F)C(F)(F)C(F)(F)C(F)(F)C(F)(F)C(F)(F)F
167	94159-80-5	Other fluorotelomer-based non-polymers		2-Tridecanol, 1-[[3-(dimethylamino)propyl]amino]-4,4,5,5,6,6,7,7,8,8,9,9,10,10,11,11,12,12,13,13,13-heneicosafluoro-	YES			DTXSID20881151	DTXCID901022438	1-((3-(Dimethylamino)propyl)amino)-(3-(perfluorodecyl))propan-2-ol	94159-80-5	Mixture of Stereoisomers	CN(C)CCCNCC(O)CC(F)(F)C(F)(F)C(F)(F)C(F)(F)C(F)(F)C(F)(F)C(F)(F)C(F)(F)C(F)(F)C(F)(F)F
168	94159-82-7	Other fluorotelomer-based non-polymers		2-Pentadecanol, 1-[[3-(dimethylamino)propyl]amino]-4,4,5,5,6,6,7,7,8,8,9,9,10,10,11,11,12,12,13,13,14,15,15,15-tetracosafluoro-14-(trifluoromethyl)-	YES			DTXSID00881154	DTXCID901022440	1-((3-(Dimethylamino)propyl)amino)-(3-(perfluoro-11-methyldodecyl))propan-2-ol	94159-82-7	Mixture of Stereoisomers	CN(C)CCCNCC(O)CC(F)(F)C(F)(F)C(F)(F)C(F)(F)C(F)(F)C(F)(F)C(F)(F)C(F)(F)C(F)(F)C(F)(F)C(F)(C(F)(F)F)C(F)(F)F
169	99955-83-6	Other fluorotelomer-based non-polymers	8:2 FTS	8:2 Fluorotelomer stearate monoester	YES			DTXSID601029611	DTXCID901514821	8:2 Fluorotelomer stearate monoester	99955-83-6	Single Compound	CCCCCCCCCCCCCCCCCC(=O)OCCC(F)(F)C(F)(F)C(F)(F)C(F)(F)C(F)(F)C(F)(F)C(F)(F)C(F)(F)F
170	302911-86-0	Other fluorotelomer-based non-polymers		8:2 Fluorotelomer citrate triester	YES			DTXSID301029612	DTXCID301514823	8:2 Fluorotelomer citrate triester	302911-86-0	Single Compound	OC(CC(=O)OCCC(F)(F)C(F)(F)C(F)(F)C(F)(F)C(F)(F)C(F)(F)C(F)(F)C(F)(F)F)(CC(=O)OCCC(F)(F)C(F)(F)C(F)(F)C(F)(F)C(F)(F)C(F)(F)C(F)(F)C(F)(F)F)CC(=O)OCCC(F)(F)C(F)(F)C(F)(F)C(F)(F)C(F)(F)C(F)(F)C(F)(F)C(F)(F)F
171	3102-79-2	Other fluorotelomer-based non-polymers		Perfluorooctylethyldichloromethyl silane	YES			DTXSID00184995	DTXCID40107486	[(Perfluorooctyl)ethyl]methyl dichlorosilane	3102-79-2	Single Compound	C[Si](Cl)(Cl)CCC(F)(F)C(F)(F)C(F)(F)C(F)(F)C(F)(F)C(F)(F)C(F)(F)C(F)(F)F
172	74612-30-9	Other fluorotelomer-based non-polymers		Perfluorooctylethyldimethylchlorosilane	YES			DTXSID10225601	DTXCID00148092	2-(Perfluorooctyl)ethyldimethylchlorosilane	74612-30-9	Single Compound	C[Si](C)(Cl)CCC(F)(F)C(F)(F)C(F)(F)C(F)(F)C(F)(F)C(F)(F)C(F)(F)C(F)(F)F
173	101947-16-4	Other fluorotelomer-based non-polymers		Perfluorooctylethyltriethoxysilane	YES			DTXSID40144396	DTXCID9066887	1H,1H,2H,2H-Perfluorodecyltriethoxysilane	101947-16-4	Single Compound	CCO[Si](CCC(F)(F)C(F)(F)C(F)(F)C(F)(F)C(F)(F)C(F)(F)C(F)(F)C(F)(F)F)(OCC)OCC
174	146090-84-8	Other fluorotelomer-based non-polymers		Silane, triethoxy(3,3,4,4,5,5,6,6,7,7,8,8,9,9,10,10,11,11,12,12,12-heneicosafluorododecyl)-	YES			DTXSID60382354	DTXCID90333379	Triethoxy[2-(perfluorodecyl)ethyl]silane	146090-84-8	Single Compound	CCO[Si](CCC(F)(F)C(F)(F)C(F)(F)C(F)(F)C(F)(F)C(F)(F)C(F)(F)C(F)(F)C(F)(F)C(F)(F)F)(OCC)OCC
175	78560-44-8	Other fluorotelomer-based non-polymers		Perfluorooctylethyltrichlorosilane	YES			DTXSID2074376	DTXCID1048126	1H,1H,2H,2H-Perfluorodecyltrichlorosilane	78560-44-8	Single Compound	FC(F)(F)C(F)(F)C(F)(F)C(F)(F)C(F)(F)C(F)(F)C(F)(F)C(F)(F)CC[Si](Cl)(Cl)Cl
176	83048-65-1	Other fluorotelomer-based non-polymers		Perfluorooctylethyltrimethoxysilane	YES			DTXSID7072884	DTXCID0048343	1H,1H,2H,2H-Perfluorodecyltrimethoxysilane	83048-65-1	Single Compound	CO[Si](CCC(F)(F)C(F)(F)C(F)(F)C(F)(F)C(F)(F)C(F)(F)C(F)(F)C(F)(F)F)(OC)OC
177	123445-18-1	Other fluorotelomer-based non-polymers		Silane, (3,3,4,4,5,5,6,6,7,7,8,8,9,9,10,10,11,11,12,12,12-heneicosafluorododecyl)trimethoxy-	YES			DTXSID40895553	DTXCID501325068	2-(Perfluorodecyl)ethyl(trimethoxy)silane	123445-18-1	Single Compound	CO[Si](CCC(F)(F)C(F)(F)C(F)(F)C(F)(F)C(F)(F)C(F)(F)C(F)(F)C(F)(F)C(F)(F)C(F)(F)F)(OC)OC
178	246234-80-0	Other fluorotelomer-based non-polymers		Silane, (3,3,4,4,5,5,6,6,7,7,8,8,9,9,10,10,10-heptadecafluorodecyl)tris(1-methylethoxy)-	YES			DTXSID80631134	DTXCID20581886	1H,1H,2H,2H-Perfluorodecyl(tri-iso-propoxy)silane	246234-80-0	Single Compound	CC(C)O[Si](CCC(F)(F)C(F)(F)C(F)(F)C(F)(F)C(F)(F)C(F)(F)C(F)(F)C(F)(F)F)(OC(C)C)OC(C)C
179	1189587-64-1	Other fluorotelomer-based non-polymers		Silane, tetrakis[2-[(3,3,4,4,5,5,6,6,7,7,8,8,9,9,10,10,10-heptadecafluorodecyl)thio]ethyl]-	YES			DTXSID501032487	DTXCID001517492	Tetrakis[2-[(perfluorodecyl)thio]ethyl]silane	1189587-64-1	Single Compound	FC(F)(F)C(F)(F)C(F)(F)C(F)(F)C(F)(F)C(F)(F)C(F)(F)C(F)(F)C(F)(F)C(F)(F)SCC[Si](CCSC(F)(F)C(F)(F)C(F)(F)C(F)(F)C(F)(F)C(F)(F)C(F)(F)C(F)(F)C(F)(F)C(F)(F)F)(CCSC(F)(F)C(F)(F)C(F)(F)C(F)(F)C(F)(F)C(F)(F)C(F)(F)C(F)(F)C(F)(F)C(F)(F)F)CCSC(F)(F)C(F)(F)C(F)(F)C(F)(F)C(F)(F)C(F)(F)C(F)(F)C(F)(F)C(F)(F)C(F)(F)F
180	68187-42-8	Other fluorotelomer-based non-polymers		Propanamide, 3-[(γ-ω-perfluoro-C4–10-alkyl)thio] derivatives	YES			DTXSID90881941	Markush	Propanamide, 3-[(.gamma.-.omega.-perfluoro-C4-10-alkyl)thio] derivs.	68187-42-8	Mixture/Formulation
181	70969-47-0	Other fluorotelomer-based non-polymers		Thiols, C8-20, γ-ω-perfluoro, telomers with acrylamide	YES			DTXSID10881943		Thiols, C8-20, gamma-omega-perfluoro, telomers with acrylamide	70969-47-0	Polymer
182	95370-51-7	Other fluorotelomer-based non-polymers		Carbamic acid, [2-(sulphothio)ethyl]-, C-(γ-ω-perfluoro-C6–9-alkyl) esters, monosodium salts	YES			DTXSID20883074	Markush	Carbamic acid, [2-(sulfothio)ethyl]-, C-(.gamma.-.omega.-perfluoro-C6-9-alkyl) esters, monosodium salts	95370-51-7	Mixture/Formulation
183	148240-85-1	Other fluorotelomer-based non-polymers		1,3-Propanediol, 2,2-bis[[(γ-ω-perfluoro-C4–10-alkyl)thio]methyl] derivatives, phosphates, ammonium salts	YES			DTXSID00883037		1,3-Propanediol, 2,2-bis[[(gamma-omega-perfluoro-C4-10-alkyl)thio]methyl], derivs., phosphates, ammonium salts	148240-85-1	Mixture/Formulation
184	148240-87-3	Other fluorotelomer-based non-polymers		1,3-Propanediol, 2,2-bis[[(γ-ω-perfluoro-C6–12-alkyl)thio]methyl] derivatives, phosphates, ammonium salts	YES			DTXSID90883046		2,2-Bis[[(gamma-omega-perfluoro-C6-12-alkyl)thio]methyl]-1,3-propanediol derivs. phosphates ammonium salts	148240-87-3	Mixture/Formulation
185	148240-89-5	Other fluorotelomer-based non-polymers		1,3-Propanediol, 2,2-bis[[(γ-ω-perfluoro-C10-20-alkyl)thio]methyl] derivs., phosphates, ammonium salts	YES			DTXSID60883038		1,3-Propanediol 2,2-bis[[(gamma-omega-perfluoro-C10-20-alkyl)thio]methyl] derivs. phosphates ammonium salts	148240-89-5	Mixture/Formulation
186	183146-60-3	Other fluorotelomer-based non-polymers		Oxirane, methyl-, polymer with oxirane, mono[2-hydroxy-3-[( γ-ω-perfluoro-C8-20-alkyl)thio]propyl] ethers	YES			DTXSID70883009		Methyloxirane polymer with oxirane, mono[2-hydroxy-3-[(.gamma.-.omega.-perfluoro-C8-20-alkyl)thio]propyl]ethers	183146-60-3	Mixture/Formulation
187	71608-61-2	Other fluorotelomer-based non-polymers		Pentanoic acid, 4,4-bis[(γ-ω-perfluoro-C8-20-alkyl)thio]derivs., compds. with diethanolamine	YES			DTXSID50883062		4,4-Bis[(.gamma.-.omega.-perfluoro-C8-20-alkyl)thio]pentanoic acid derivs. compds. with diethanolamine	71608-61-2	Mixture/Formulation
188	94200-45-0	Other fluorotelomer-based non-polymers		1,2-Undecanediol, 4,4,5,5,6,6,7,7,8,8,9,9,10,10,11,11,11-heptadecafluoro-, 1-(dihydrogen phosphate), ammonium salt (1:2)	YES			DTXSID80881172	DTXCID101022458	Diammonium (perfluorooctyl)-2-hydroxypropyl phosphate	94200-45-0	Mixture of Stereoisomers	[NH4+].[NH4+].OC(COP([O-])([O-])=O)CC(F)(F)C(F)(F)C(F)(F)C(F)(F)C(F)(F)C(F)(F)C(F)(F)C(F)(F)F
189	93776-00-2	Other fluorotelomer-based non-polymers		2-Pentadecanol, 1,1'-[oxybis[(1-methyl-2,1-ethanediyl)oxy]]bis[4,4,5,5,6,6,7,7,8,8,9,9,10,10,11,11,12,12,13,13,14,14,15,15,15-pentacosafluoro-	YES			DTXSID40881017	DTXCID301022335	1,1'-(Oxybis((1-methylethylene)oxy))bis(3-(perfluorododecyl)propan-2-ol)	93776-00-2	Mixture of Stereoisomers	CC(COCC(O)CC(F)(F)C(F)(F)C(F)(F)C(F)(F)C(F)(F)C(F)(F)C(F)(F)C(F)(F)C(F)(F)C(F)(F)C(F)(F)C(F)(F)F)OC(C)COCC(O)CC(F)(F)C(F)(F)C(F)(F)C(F)(F)C(F)(F)C(F)(F)C(F)(F)C(F)(F)C(F)(F)C(F)(F)C(F)(F)C(F)(F)F
190	77117-48-7	Other fluorotelomer-based non-polymers	F8H2	Decane, 1,1,1,2,2,3,3,4,4,5,5,6,6,7,7,8,8-heptadecafluoro-	YES			DTXSID90880979	DTXCID301022311	(Perfluoro-n-octyl)ethane	77117-48-7	Single Compound	CCC(F)(F)C(F)(F)C(F)(F)C(F)(F)C(F)(F)C(F)(F)C(F)(F)C(F)(F)F
191	1835250-28-6	Other fluorotelomer-based non-polymers	F8H3	Undecane, 1,1,1,2,2,3,3,4,4,5,5,6,6,7,7,8,8-heptadecafluoro-	YES			DTXSID30895229	DTXCID101324749	1-(Perfluorooctyl)propane	1835250-28-6	Single Compound	CCCC(F)(F)C(F)(F)C(F)(F)C(F)(F)C(F)(F)C(F)(F)C(F)(F)C(F)(F)F
192	182130-12-7	Other fluorotelomer-based non-polymers	F8H4	Dodecane, 1,1,1,2,2,3,3,4,4,5,5,6,6,7,7,8,8-heptadecafluoro-	YES			DTXSID40895230	DTXCID401324750	1-(Perfluorooctyl)butane	182130-12-7	Single Compound	CCCCC(F)(F)C(F)(F)C(F)(F)C(F)(F)C(F)(F)C(F)(F)C(F)(F)C(F)(F)F
193	1835250-47-9	Other fluorotelomer-based non-polymers	F8H5	Tridecane, 1,1,1,2,2,3,3,4,4,5,5,6,6,7,7,8,8-heptadecafluoro-	YES			DTXSID50895246	DTXCID201324766	1-(Perfluorooctyl)pentane	1835250-47-9	Single Compound	CCCCCC(F)(F)C(F)(F)C(F)(F)C(F)(F)C(F)(F)C(F)(F)C(F)(F)C(F)(F)F
194	182130-14-9	Other fluorotelomer-based non-polymers	F8H6	Tetradecane, 1,1,1,2,2,3,3,4,4,5,5,6,6,7,7,8,8-heptadecafluoro-	YES			DTXSID80895254	DTXCID701324773	1-(Perfluorooctyl)hexane	182130-14-9	Single Compound	CCCCCCC(F)(F)C(F)(F)C(F)(F)C(F)(F)C(F)(F)C(F)(F)C(F)(F)C(F)(F)F
195	182130-15-0	Other fluorotelomer-based non-polymers	F8H7	Pentadecane, 1,1,1,2,2,3,3,4,4,5,5,6,6,7,7,8,8-heptadecafluoro-	YES			DTXSID60895257	DTXCID801324776	1-(Perfluorooctyl)heptane	182130-15-0	Single Compound	CCCCCCCC(F)(F)C(F)(F)C(F)(F)C(F)(F)C(F)(F)C(F)(F)C(F)(F)C(F)(F)F
196	6145-05-7	Other fluorotelomer-based non-polymers	F8H8	Hexadecane, 1,1,1,2,2,3,3,4,4,5,5,6,6,7,7,8,8-heptadecafluoro-	YES			DTXSID50387373	DTXCID301331930	1-Perfluorooctyl octane	6145-05-7	Single Compound	CCCCCCCCC(F)(F)C(F)(F)C(F)(F)C(F)(F)C(F)(F)C(F)(F)C(F)(F)C(F)(F)F
197	931415-52-0	Other fluorotelomer-based non-polymers	F8H9	Heptadecane, 1,1,1,2,2,3,3,4,4,5,5,6,6,7,7,8,8-heptadecafluoro-	YES			DTXSID70895263	DTXCID601324782	1-(Perfluorooctyl)nonane	931415-52-0	Single Compound	CCCCCCCCCC(F)(F)C(F)(F)C(F)(F)C(F)(F)C(F)(F)C(F)(F)C(F)(F)C(F)(F)F
198	138472-76-1	Other fluorotelomer-based non-polymers	F8H10	Octadecane, 1,1,1,2,2,3,3,4,4,5,5,6,6,7,7,8,8-heptadecafluoro-	YES			DTXSID90381976	DTXCID40333001	1-(Perfluoro-n-octyl)decane	138472-76-1	Single Compound	CCCCCCCCCCC(F)(F)C(F)(F)C(F)(F)C(F)(F)C(F)(F)C(F)(F)C(F)(F)C(F)(F)F
199	117146-18-6	Other fluorotelomer-based non-polymers	F8H16	Tetracosane, 1,1,1,2,2,3,3,4,4,5,5,6,6,7,7,8,8-heptadecafluoro-	YES			DTXSID40381981	DTXCID40333006	1-(Perfluoro-n-octyl)hexadecane	117146-18-6	Single Compound	CCCCCCCCCCCCCCCCC(F)(F)C(F)(F)C(F)(F)C(F)(F)C(F)(F)C(F)(F)C(F)(F)C(F)(F)F
200	133310-73-3	Other fluorotelomer-based non-polymers	F8H18	Hexacosane, 1,1,1,2,2,3,3,4,4,5,5,6,6,7,7,8,8-heptadecafluoro-	YES			DTXSID60881377	DTXCID301022630	1-(Perfluorooctyl)octadecane	133310-73-3	Single Compound	CCCCCCCCCCCCCCCCCCC(F)(F)C(F)(F)C(F)(F)C(F)(F)C(F)(F)C(F)(F)C(F)(F)C(F)(F)F
201	137338-39-7	Other fluorotelomer-based non-polymers	F8H20	Octacosane, 1,1,1,2,2,3,3,4,4,5,5,6,6,7,7,8,8-heptadecafluoro-	YES			DTXSID00881376	DTXCID001022629	1-(Perfluorooctyl)eicosane	137338-39-7	Single Compound	CCCCCCCCCCCCCCCCCCCCC(F)(F)C(F)(F)C(F)(F)C(F)(F)C(F)(F)C(F)(F)C(F)(F)C(F)(F)F
202	137338-40-0	Other fluorotelomer-based non-polymers	F8H22	Triacontane, 1,1,1,2,2,3,3,4,4,5,5,6,6,7,7,8,8-heptadecafluoro-	YES			DTXSID30881384	DTXCID501022636	1-(Perfluorooctyl)docosane	137338-40-0	Single Compound	CCCCCCCCCCCCCCCCCCCCCCC(F)(F)C(F)(F)C(F)(F)C(F)(F)C(F)(F)C(F)(F)C(F)(F)C(F)(F)F
203	137338-41-1	Other fluorotelomer-based non-polymers	F8H24	Dotriacontane, 1,1,1,2,2,3,3,4,4,5,5,6,6,7,7,8,8-heptadecafluoro-	YES			DTXSID90881385	DTXCID201022637	1-(Perfluorooctyl)tetracosane	137338-41-1	Single Compound	CCCCCCCCCCCCCCCCCCCCCCCCC(F)(F)C(F)(F)C(F)(F)C(F)(F)C(F)(F)C(F)(F)C(F)(F)C(F)(F)F
204	154478-87-2	Other fluorotelomer-based non-polymers	F10H2	Dodecane, 1,1,1,2,2,3,3,4,4,5,5,6,6,7,7,8,8, 9,9,10,10-heneicosafluoro-	YES			DTXSID60895252	DTXCID301324771	1-(Perfluorodecyl)ethane	154478-87-2	Single Compound	CCC(F)(F)C(F)(F)C(F)(F)C(F)(F)C(F)(F)C(F)(F)C(F)(F)C(F)(F)C(F)(F)C(F)(F)F
205	1835251-22-3	Other fluorotelomer-based non-polymers	F10H3	Tridecane, 1,1,1,2,2,3,3,4,4,5,5,6,6,7,7,8,8,9,9,10,10-heneicosafluoro-	YES			DTXSID90895260	DTXCID901324779	1-(Perfluoro-n-decyl)propane	1835251-22-3	Single Compound	CCCC(F)(F)C(F)(F)C(F)(F)C(F)(F)C(F)(F)C(F)(F)C(F)(F)C(F)(F)C(F)(F)C(F)(F)F
206	1244062-17-6	Other fluorotelomer-based non-polymers	F10H4	Tetradecane, 1,1,1,2,2,3,3,4,4,5,5,6,6,7,7,8,8,9,9,10,10-heneicosafluoro-	YES			DTXSID00895276	DTXCID301324795	1-(Perfluorodecanyl)butane	1244062-17-6	Single Compound	CCCCC(F)(F)C(F)(F)C(F)(F)C(F)(F)C(F)(F)C(F)(F)C(F)(F)C(F)(F)C(F)(F)C(F)(F)F
207	250738-42-2	Other fluorotelomer-based non-polymers	F10H5	Pentadecane, 1,1,1,2,2,3,3,4,4,5,5,6,6,7,7,8,8,9,9,10,10-heneicosafluoro-	YES			DTXSID20895273	DTXCID201324792	1-(Perfluorodecanyl)pentane	250738-42-2	Single Compound	CCCCCC(F)(F)C(F)(F)C(F)(F)C(F)(F)C(F)(F)C(F)(F)C(F)(F)C(F)(F)C(F)(F)C(F)(F)F
208	116177-54-9	Other fluorotelomer-based non-polymers	F10H6	Hexadecane, 1,1,1,2,2,3,3,4,4,5,5,6,6,7,7,8,8,9,9,10,10-heneicosafluoro-	YES			DTXSID70895288	DTXCID101324806	1-(Perfluorodecyl)hexane	116177-54-9	Single Compound	CCCCCCC(F)(F)C(F)(F)C(F)(F)C(F)(F)C(F)(F)C(F)(F)C(F)(F)C(F)(F)C(F)(F)C(F)(F)F
209	200817-54-5	Other fluorotelomer-based non-polymers	F10H7	Heptadecane, 1,1,1,2,2,3,3,4,4,5,5,6,6,7,7,8,8,9,9,10,10-heneicosafluoro-	YES			DTXSID00895296	DTXCID301324814	1-(Perfluorodecyl)heptane	200817-54-5	Single Compound	CCCCCCCC(F)(F)C(F)(F)C(F)(F)C(F)(F)C(F)(F)C(F)(F)C(F)(F)C(F)(F)C(F)(F)C(F)(F)F
210	93454-70-7	Other fluorotelomer-based non-polymers	F10H8	Octadecane, 1,1,1,2,2,3,3,4,4,5,5,6,6,7,7,8,8,9,9,10,10-heneicosafluoro-	YES			DTXSID80895310	DTXCID001324827	1-(Perfluorodecyl)octane	93454-70-7	Single Compound	CCCCCCCCC(F)(F)C(F)(F)C(F)(F)C(F)(F)C(F)(F)C(F)(F)C(F)(F)C(F)(F)C(F)(F)C(F)(F)F
211	125635-85-0	Other fluorotelomer-based non-polymers	F10H9	Nonadecane, 1,1,1,2,2,3,3,4,4,5,5,6,6,7,7,8,8, 9,9,10,10-heneicosafluoro-	YES			DTXSID20895334	DTXCID901324850	1-(Perfluorodecanyl)nonane	125635-85-0	Single Compound	CCCCCCCCCC(F)(F)C(F)(F)C(F)(F)C(F)(F)C(F)(F)C(F)(F)C(F)(F)C(F)(F)C(F)(F)C(F)(F)F
212	90499-29-9	Other fluorotelomer-based non-polymers	F10H10	Eicosane, 1,1,1,2,2,3,3,4,4,5,5,6,6,7,7,8,8,9,9,10,10-heneicosafluoro-	YES			DTXSID60895353	DTXCID801324869	1-(Perfluorodecyl)decane	90499-29-9	Single Compound	CCCCCCCCCCC(F)(F)C(F)(F)C(F)(F)C(F)(F)C(F)(F)C(F)(F)C(F)(F)C(F)(F)C(F)(F)C(F)(F)F
213	93454-71-8	Other fluorotelomer-based non-polymers	F10H12	Docosane, 1,1,1,2,2,3,3,4,4,5,5,6,6,7,7,8,8,9,9,10,10-heneicosafluoro-	YES			DTXSID80895355	DTXCID801324871	12-(Perfluorodecanyl)dodecane	93454-71-8	Single Compound	CCCCCCCCCCCCC(F)(F)C(F)(F)C(F)(F)C(F)(F)C(F)(F)C(F)(F)C(F)(F)C(F)(F)C(F)(F)C(F)(F)F
214	133299-41-9	Other fluorotelomer-based non-polymers		Eicosane, 1,1,1,2,2,3,3,4,4,5,5,6,6,7,7,8,8,13,13,14,14,15,15,16,16,17,17,18,18,19,19,20,20,20-tetratriacontafluoro-	YES			DTXSID60895474	DTXCID801324990	1,4-Bis(perfluorooctyl)butane	133299-41-9	Single Compound	FC(F)(F)C(F)(F)C(F)(F)C(F)(F)C(F)(F)C(F)(F)C(F)(F)C(F)(F)CCCCC(F)(F)C(F)(F)C(F)(F)C(F)(F)C(F)(F)C(F)(F)C(F)(F)C(F)(F)F
215	100550-08-1	Other fluorotelomer-based non-polymers		Tetracosane, 1,1,1,2,2,3,3,4,4,5,5,6,6,7,7,8,8,17,17,18,18,19,19,20,20,21,21,22,22,23,23,24,24,24-tetratriacontafluoro-	YES			DTXSID20895475	DTXCID501324991	1,8-Bis(perfluorooctyl)octane	100550-08-1	Single Compound	FC(F)(F)C(F)(F)C(F)(F)C(F)(F)C(F)(F)C(F)(F)C(F)(F)C(F)(F)CCCCCCCCC(F)(F)C(F)(F)C(F)(F)C(F)(F)C(F)(F)C(F)(F)C(F)(F)C(F)(F)F
216	1244062-16-5	Other fluorotelomer-based non-polymers		9-Tetracosene, 1,1,1,2,2,3,3,4,4,5,5,6,6,7,7,8,8-heptadecafluoro-	YES			DTXSID20895551	DTXCID101325066	1-(Perfluorooctyl)-1-hexadecene	1244062-16-5	Mixture of Stereoisomers	CCCCCCCCCCCCCCC=CC(F)(F)C(F)(F)C(F)(F)C(F)(F)C(F)(F)C(F)(F)C(F)(F)C(F)(F)F
217	31200-97-2	Other fluorotelomer-based non-polymers		1-Undecanol, 4,4,5,5,6,6,7,7,8,8,9,9,10,11,11,11-hexadecafluoro-10-(trifluoromethyl)-	YES			DTXSID401032739	DTXCID101517752	3-(Perfluoro-7-methyloctyl)propanol	31200-97-2	Single Compound	OCCCC(F)(F)C(F)(F)C(F)(F)C(F)(F)C(F)(F)C(F)(F)C(F)(C(F)(F)F)C(F)(F)F
218	423-56-3	Other fluorotelomer-based non-polymers	8:1 FTOH	1-Nonanol, 2,2,3,3,4,4,5,5,6,6,7,7,8,8,9,9,9-heptadecafluoro-	YES			DTXSID80336475	DTXCID30287564	8:1 Fluorotelomer alcohol	423-56-3	Single Compound	OCC(F)(F)C(F)(F)C(F)(F)C(F)(F)C(F)(F)C(F)(F)C(F)(F)C(F)(F)F
219	307-37-9	Other fluorotelomer-based non-polymers	9:1 FTOH	1-Decanol, 2,2,3,3,4,4,5,5,6,6,7,7,8,8,9,9,10,10,10-nonadecafluoro-	YES			DTXSID00369826	DTXCID10320862	9:1 Fluorotelomer alcohol	307-37-9	Single Compound	OCC(F)(F)C(F)(F)C(F)(F)C(F)(F)C(F)(F)C(F)(F)C(F)(F)C(F)(F)C(F)(F)F
220	307-46-0	Other fluorotelomer-based non-polymers	10:1 FTOH	1-Undecanol, 2,2,3,3,4,4,5,5,6,6,7,7,8,8,9,9,10,10,11,11,11-heneicosafluoro-	YES			DTXSID00380056	DTXCID40331082	10:1 Fluorotelomer alcohol	307-46-0	Single Compound	OCC(F)(F)C(F)(F)C(F)(F)C(F)(F)C(F)(F)C(F)(F)C(F)(F)C(F)(F)C(F)(F)C(F)(F)F
221	135984-68-8	Other fluorotelomer-based non-polymers	8:2 FTAL	Decanal, 3,3,4,4,5,5,6,6,7,7,8,8,9,9,10,10,10-heptadecafluoro-	YES			DTXSID10895489	DTXCID801325005	2-(Perfluorooctyl)ethanal	135984-68-8	Single Compound	FC(F)(F)C(F)(F)C(F)(F)C(F)(F)C(F)(F)C(F)(F)C(F)(F)C(F)(F)CC=O
222	864551-38-2	Other fluorotelomer-based non-polymers	10:2 FTAL	Dodecanal, 3,3,4,4,5,5,6,6,7,7,8,8,9,9,10,10, 11,11,12,12,12-heneicosafluoro-	YES			DTXSID40895538	DTXCID401325053	2-(Perfluorodecyl)ethanal	864551-38-2	Single Compound	FC(F)(F)C(F)(F)C(F)(F)C(F)(F)C(F)(F)C(F)(F)C(F)(F)C(F)(F)C(F)(F)C(F)(F)CC=O
223	864551-40-6	Other fluorotelomer-based non-polymers	10:2 FTUAL	2-Dodecenal, 3,4,4,5,5,6,6,7,7,8,8,9,9,10,10,11,11,12,12,12-eicosafluoro-	YES			DTXSID20895657	DTXCID701325171	3-(Perfluorononyl)-3-fluoropropenal	864551-40-6	Mixture of Stereoisomers	FC(=CC=O)C(F)(F)C(F)(F)C(F)(F)C(F)(F)C(F)(F)C(F)(F)C(F)(F)C(F)(F)C(F)(F)F
224	63967-40-8	Other fluorotelomer-based non-polymers	PFNAL	Nonanal, 2,2,3,3,4,4,5,5,6,6,7,7,8,8,9,9,9-heptadecafluoro-	YES			DTXSID20561002	DTXCID80511780	(Perfluorooctane)-1-carbaldehydle	63967-40-8	Single Compound	FC(F)(F)C(F)(F)C(F)(F)C(F)(F)C(F)(F)C(F)(F)C(F)(F)C(F)(F)C=O
225	335-73-9	Other fluorotelomer-based non-polymers	PFDAL	Decanal, 2,2,3,3,4,4,5,5,6,6,7,7,8,8,9,9,10,10,10-nonadecafluoro-	YES			DTXSID801032812	DTXCID701517829	Perfluorodecanal	335-73-9	Single Compound	FC(F)(F)C(F)(F)C(F)(F)C(F)(F)C(F)(F)C(F)(F)C(F)(F)C(F)(F)C(F)(F)C=O
226	63967-42-0	Other fluorotelomer-based non-polymers	PFUnDAL	Undecanal, 2,2,3,3,4,4,5,5,6,6,7,7,8,8,9,9,10,10,11,11,11-heneicosafluoro-	YES			DTXSID80895532	DTXCID601325047	Perfluoroundecanal	63967-42-0	Single Compound	FC(F)(F)C(F)(F)C(F)(F)C(F)(F)C(F)(F)C(F)(F)C(F)(F)C(F)(F)C(F)(F)C(F)(F)C=O
227	56900-98-2	Other fluorotelomer-based non-polymers		Ethanol, 2-[2-[(3,3,4,4,5,5,6,6,7,7,8,8,9,9,10,10,10-heptadecafluorodecyl)oxy]ethoxy]-	YES			DTXSID101033057	DTXCID001518090	8-(Perfluorooctyl)-3,6-dioxaoctanol	56900-98-2	Single Compound	OCCOCCOCCC(F)(F)C(F)(F)C(F)(F)C(F)(F)C(F)(F)C(F)(F)C(F)(F)C(F)(F)F
228	88243-13-4	Other fluorotelomer-based non-polymers		Propanol, [2-[(3,3,4,4,5,5,6,6,7,7,8,8,9,9,10,10,10-heptadecafluorodecyl)oxy]methylethoxy]-	YES			DTXSID701033893	Markush	2‐{2‐[(Perfluorooctyl)ethoxy](methyl)ethoxy}(methyl)ethan‐1‐ol	88243-13-4	Mixture/Formulation
229	88243-12-3	Other fluorotelomer-based non-polymers		Ethanol, 2-[2-[2-[(3,3,4,4,5,5,6,6,7,7,8,8,9,9,10,10,10-heptadecafluorodecyl)oxy]methylethoxy] methylethoxy]-	YES			DTXSID601033890	Markush	2-[2-[2-[(Perfluorooctyl)ethyloxy](methyl)ethoxy](methyl)ethoxy]ethanol	88243-12-3	Mixture/Formulation
230	55427-54-8	Other fluorotelomer-based non-polymers		3,6,9,12-Tetraoxadocosan-1-ol, 15,15,16,16,17,17,18,18,19,19,20,20,21,21,22,22,22-heptadecafluoro-	YES			DTXSID301033053	DTXCID601518086	14-(Perfluorooctyl)-3,6,9,12-tetraoxatetradecan-1-ol	55427-54-8	Single Compound	OCCOCCOCCOCCOCCC(F)(F)C(F)(F)C(F)(F)C(F)(F)C(F)(F)C(F)(F)C(F)(F)C(F)(F)F
231	88271-22-1	Other fluorotelomer-based non-polymers		3,6,9,12-Tetraoxadocosan-1-ol, 15,15,16,16,17,17,18,18,19,19,20,20,21,21,22,22,22-heptadecafluorodimethyl-	YES			DTXSID501034021	Markush	14-(Perfluorooctyl)-dimethyl-3,6,9,12-tetraoxatetradecan-1-ol	88271-22-1	Mixture/Formulation
232	88243-14-5	Other fluorotelomer-based non-polymers		3,6,9,12-Tetraoxadocosan-1-ol, 15,15,16,16,17,17,18,18,19,19,20,20,21,21,22,22,22-heptadecafluorotetramethyl-	YES			DTXSID501033897	Markush	14-(Perfluorooctyl)tetramethyl-3,6,9,12-tetraoxatetradecan-1-ol	88243-14-5	Mixture/Formulation
233	88243-15-6	Other fluorotelomer-based non-polymers		3,6,9,12,15-Pentaoxapentacosan-1-ol, 18,18,19,19,20,20,21,21,22,22,23,23,24,24,25,25,25-heptadecafluoropentamethyl-	YES			DTXSID901033906	Markush	17-(Perfluorooctyl)-3,6,9,12,15-pentaoxa(pentamethyl)heptadecan-1-ol	88243-15-6	Mixture/Formulation
234	88247-39-6	Other fluorotelomer-based non-polymers		3,6,9,12,15,18-Hexaoxaoctacosan-1-ol, 21,21,22,22,23,23,24,24,25,25,26,26,27,27,28,28,28-heptadecafluoro-	YES			DTXSID701034003	DTXCID201518727	20-(Perfluorooctyl)-3,6,9,12,15,18-hexaoxaeicosan-1-ol	88247-39-6	Single Compound	OCCOCCOCCOCCOCCOCCOCCC(F)(F)C(F)(F)C(F)(F)C(F)(F)C(F)(F)C(F)(F)C(F)(F)C(F)(F)F
235	88243-11-2	Other fluorotelomer-based non-polymers		3,6,9,12,15,18-Hexaoxaoctacosan-1-ol, 21,21,22,22,23,23,24,24,25,25,26,26,27,27,28,28,28-heptadecafluoropentamethyl-	YES			DTXSID301033889	Markush	20-(Perfluorooctyl)pentamethyl-3,6,9,12,15,18-hexaoxaeicosan-1-ol	88243-11-2	Mixture/Formulation
236	88243-16-7	Other fluorotelomer-based non-polymers		3,6,9,12,15,18-Hexaoxaoctacosan-1-ol, 21,21,22,22,23,23,24,24,25,25,26,26,27,27,28,28,28-heptadecafluoro hexamethyl-	YES			DTXSID601034000	Markush	20-(Perfluorooctyl)hexamethyl-3,6,9,12,15,18-hexaoxaeicosan-1-ol	88243-16-7	Mixture/Formulation
237	88243-10-1	Other fluorotelomer-based non-polymers		3,6,9,12,15,18,21-Heptaoxahentriacontan-1-ol, 24,24,25,25,26,26,27,27,28,28,29,29,30, 30,31,31,31-heptadecafluoropentamethyl-	YES			DTXSID601033888	Markush	23-(Perfluorooctyl)pentamethyl-3,6,9,12,15,18,21-heptaoxatricosan-1-ol	88243-10-1	Mixture/Formulation
238	88247-40-9	Other fluorotelomer-based non-polymers		3,6,9,12,15,18,21,24-Octaoxatetratriacontan-1-ol, 27,27,28,28,29,29,30,30,31,31,32,32,33,33,34,34,34-heptadecafluoro-	YES			DTXSID901034009	DTXCID601518731	26-(Perfluorooctyl)-3,6,9,12,15,18,21,24-octaoxahexaeicosan-1-ol	88247-40-9	Single Compound	OCCOCCOCCOCCOCCOCCOCCOCCOCCC(F)(F)C(F)(F)C(F)(F)C(F)(F)C(F)(F)C(F)(F)C(F)(F)C(F)(F)F
239	88243-17-8	Other fluorotelomer-based non-polymers		3,6,9,12,15,18,21,24-Octaoxatetratriacontan-1-ol, 27,27,28,28,29,29,30,30,31,31,32,32,33,33,34,34,34-heptadecafluorooctamethyl-	YES			DTXSID001034002	Markush	26-(Perfluorooctyl)octamethyl-3,6,9,12,15,18,21,24-octaoxahexcosan-1-ol	88243-17-8	Mixture/Formulation
240	88243-09-8	Other fluorotelomer-based non-polymers		3,6,9,12,15-Pentaoxapentacosan-1-ol, 18,18, 19,19,20,20,21,21,22,22,23,23,24,24,25,25,25-heptadecafluoropentamethyl-, acetate	YES			DTXSID101033883	Markush	17-(Perfluorooctyl)pentamethyl-3,6,9,12,15-pentaoxaheptadecan-1-yl acetate	88243-09-8	Mixture/Formulation
241	121500-31-0	Other fluorotelomer-based non-polymers		1,2-Propanediol, 3-[(3,3,4,4,5,5,6,6,7,7,8,8,9,9,10,10,10-heptadecafluorodecyl)oxy]-	YES			DTXSID401032496	DTXCID001517509	3-[(Perfluorooctyl)ethyloxy]-1,2-propanediol	121500-31-0	Mixture of Stereoisomers	OCC(O)COCCC(F)(F)C(F)(F)C(F)(F)C(F)(F)C(F)(F)C(F)(F)C(F)(F)C(F)(F)F
242	67549-47-7	Other fluorotelomer-based non-polymers		11,14,17,20,23,26,29,32-Octaoxaoctatetracontan-33-one, 1,1,1,2,2,3,3,4,4,5,5,6,6,7,7,8,8-heptadecafluoro-	YES			DTXSID401033482	DTXCID601518393	1-(Perfluorooctyl)-3,6,9,12,15,18,21,24-octaoxatetracontan-25-one	67549-47-7	Single Compound	CCCCCCCCCCCCCCCC(=O)OCCOCCOCCOCCOCCOCCOCCOCCC(F)(F)C(F)(F)C(F)(F)C(F)(F)C(F)(F)C(F)(F)C(F)(F)C(F)(F)F
243	67535-33-5	Other fluorotelomer-based non-polymers		Tridecanoic acid, 27,27,28,28,29,29,30,30,31,31,32,32,33,33,34,34,34-heptadecafluoro-3,6,9,12,15,18,21,24-octaoxatetra triacont-1-yl ester	YES			DTXSID701033479	DTXCID901518392	1-(Perfluorooctyl)-3,6,9,12,15,18,21,24,27-nonaoxatetracontan-28-one	67535-33-5	Single Compound	CCCCCCCCCCCCC(=O)OCCOCCOCCOCCOCCOCCOCCOCCOCCC(F)(F)C(F)(F)C(F)(F)C(F)(F)C(F)(F)C(F)(F)C(F)(F)C(F)(F)F
244	38565-53-6	Other fluorotelomer-based non-polymers		Oxirane, 2-(2,2,3,3,4,4,5,5,6,6,7,7,8,8,9,9,9-heptadecafluorononyl)-	YES			DTXSID50880415	DTXCID501021864	3-(Perfluorooctyl)-1,2-propenoxide	38565-53-6	Mixture of Stereoisomers	FC(F)(F)C(F)(F)C(F)(F)C(F)(F)C(F)(F)C(F)(F)C(F)(F)C(F)(F)CC1CO1
245	114482-33-6	Other fluorotelomer-based non-polymers		Oxirane, 2-[[(3,3,4,4,5,5,6,6,7,7,8,8,9,9,10,10,10-heptadecafluorodecyl)oxy]methyl]-	YES			DTXSID001032420	DTXCID601517426	2-(Perfluorooctyl)ethoxymethyloxirane	114482-33-6	Single Compound	FC(F)(F)C(F)(F)C(F)(F)C(F)(F)C(F)(F)C(F)(F)C(F)(F)C(F)(F)CCOCC1CO1
246	99679-40-0	Other fluorotelomer-based non-polymers		1-Decanaminium, N,N-diethyl-3,3,4,4,5,5, 6,6,7,7,8,8,9,9,10,10,10-heptadecafluoro-2-hydroxy-N-methyl-, iodide (1:1)	YES			DTXSID001034345	DTXCID801518975	2-(Perfluorooctyl)-2-hydroxy-N,N-Diethyl-N-methylethanaminium iodide	99679-40-0	Single Compound	[I-].CC[N+](C)(CC)CC(O)C(F)(F)C(F)(F)C(F)(F)C(F)(F)C(F)(F)C(F)(F)C(F)(F)C(F)(F)F
247	93776-18-2	Other fluorotelomer-based non-polymers		1-Undecanaminium, 4,4,5,5,6,6,7,7,8,8,9,9,10,10,11,11,11-heptadecafluoro-2-hydroxy-N,N-bis(2-hydroxyethyl)-N-methyl-, iodide (1:1)	YES			DTXSID00881053	DTXCID201022370	Bis(2-hydroxyethyl)methyl(3-(perfluorooctyl)-2-hydroxypropyl)ammonium iodide	93776-18-2	Mixture of Stereoisomers	[I-].C[N+](CCO)(CCO)CC(O)CC(F)(F)C(F)(F)C(F)(F)C(F)(F)C(F)(F)C(F)(F)C(F)(F)C(F)(F)F
248	94817-79-5	Other fluorotelomer-based non-polymers		2-Undecanol, 3,3,4,4,5,5,6,6,7,7,8,8,9,9,10,10,11,11,11-nonadecafluoro-1-[(1-methylpropyl) amino]-	YES			DTXSID50895948	DTXCID101325442	2-[(Butan-2-yl)amino]-1-(perfluorononyl)ethan-1-ol	94817-79-5	Single Compound	CCC(C)NCC(O)C(F)(F)C(F)(F)C(F)(F)C(F)(F)C(F)(F)C(F)(F)C(F)(F)C(F)(F)C(F)(F)F
249	94817-80-8	Other fluorotelomer-based non-polymers		2-Dodecanol, 4,4,5,5,6,6,7,7,8,8,9,9,10,10,11,11,12,12,12-nonadecafluoro-1-[(1-methylpropyl) amino]-	YES			DTXSID901034304	DTXCID301518944	3-(Perfluorononyl)-2-hydroxy-N-(1-methylpropyl)propylamine	94817-80-8	Single Compound	CCC(C)NCC(O)CC(F)(F)C(F)(F)C(F)(F)C(F)(F)C(F)(F)C(F)(F)C(F)(F)C(F)(F)C(F)(F)F
250	121912-26-3	Other fluorotelomer-based non-polymers		1-Propanaminium, 3-[[4-[(3,3,4,4,5,5,6,6,7,7,8,8, 9,9,10,10,10-heptadecafluorodecyl)oxy]-1,4-dioxo-2-buten-1-yl]amino]-N,N,N-trimethyl-, iodide (1:1)	YES			DTXSID401032515	DTXCID501517528	3-[[4-[(Perfluorooctyl)ethoxy]-1,4-dioxo-2-buten-1-yl]amino]-N,N,N-trimethyl-1-propanaminium iodide (1:1)	121912-26-3	Mixture of Stereoisomers	[I-].C[N+](C)(C)CCCNC(=O)C=CC(=O)OCCC(F)(F)C(F)(F)C(F)(F)C(F)(F)C(F)(F)C(F)(F)C(F)(F)C(F)(F)F
251	25935-14-2	Other fluorotelomer-based non-polymers		Pyridinium, 1-(3,3,4,4,5,5,6,6,7,7,8,8,9,9,10,10,10-heptadecafluorodecyl)-, iodide (1:1)	YES			DTXSID50880238	DTXCID601021817	1-[(Perfluorooctyl)ethyl]pyridinium iodide	25935-14-2	Single Compound	[I-].FC(F)(F)C(F)(F)C(F)(F)C(F)(F)C(F)(F)C(F)(F)C(F)(F)C(F)(F)CC[N+]1=CC=CC=C1
252	100155-23-5	Other fluorotelomer-based non-polymers		Ethanaminium, N-ethyl-2-[[[[3-[[[[3-[[[[3-[[[(3,3,4,4,5,5,6,6,7,7,8,8,9,9,10,10,10-heptadeca fluorodecyl)oxy]carbonyl]amino]methylphenyl] amino]carbonyl]amino]methylphenyl]amino]carbonyl]amino]methylphenyl]amino]carbonyl]oxy]-N,N-dimethyl-, ethyl sulfate	YES			DTXSID901033194	Markush	N-ethyl-2-[[[[3-[[[[3-[[[[3-[[[(perfluorooctyl)ethoxy]carbonyl]amino]methylphenyl]amino]carbonyl]amino]methylphenyl]amino]carbonyl]amino]methylphenyl]amino]carbonyl]oxy]-N,N-dimethylethanaminium ethyl sulfate	100155-23-5	Mixture/Formulation
253		Other fluorotelomer-based non-polymers		1-Decanamine, 3,3,4,4,5,5,6,6,7,7,8,8,9,9,10,10,10-heptadecafluoro-N,N-dimethyl-, N-oxide	YES			DTXSID201033074	DTXCID001518107	8:2 Fluorotelomer N,N-dimethyl-, N-oxide	NOCAS_1033074	Single Compound	CN(C)(=O)CCC(F)(F)C(F)(F)C(F)(F)C(F)(F)C(F)(F)C(F)(F)C(F)(F)C(F)(F)F
254		Other fluorotelomer-based non-polymers		1-Undecanamine, 3,3,4,4,5,5,6,6,7,7,8,8,9,9,10,10,11,11,11-nonadecafluoro-N,N-dimethyl-, N-oxide	YES			DTXSID001033161	DTXCID701518196	9:2 Fluorotelomer N,N-dimethyl-, N-oxide	NOCAS_1033161	Single Compound	CN(C)(=O)CCC(F)(F)C(F)(F)C(F)(F)C(F)(F)C(F)(F)C(F)(F)C(F)(F)C(F)(F)C(F)(F)F
255	100107-48-0	Other fluorotelomer-based non-polymers		Ethanaminium, N-ethyl-2-[[[[3-[[[3-[[[3-[[[(3,3,4,4,5,5,6,6,7,7,8,8,9,9,10,10,10-heptadeca fluorodecyl)oxy]carbonyl]amino]methylphenyl] carbonimidoyl]amino]methylphenyl]carbonimidoyl]amino]methylphenyl]amino]carbonyl]oxy]-N,N-dimethyl-, ethyl sulfate	YES			DTXSID301033196	Markush	N-Ethyl-2-[[[[3-[[[3-[[[3-[[[(fluorooctyl)ethoxy]carbonyl]amino]methylphenyl]carbonimidoyl]amino]methylphenyl]carbonimidoyl]amino]methylphenyl]amino]carbonyl]oxy]-N,N-dimethylethanaminium ethylsulfate	100107-48-0	Mixture/Formulation
256	2089109-26-0	Other fluorotelomer-based non-polymers		1-Decanaminium, N-(carboxymethyl)-3,3,4,4,5,5, 6,6,7,7,8,8,9,9,10,10,10-heptadecafluoro-N,N-dimethyl-	YES			DTXSID301032574	DTXCID101517588	(Carboxymethyl)[(heptadecafluorooctyl)ethyl]dimethylazanium	2089109-26-0	Single Compound	C[N+](C)(CCC(F)(F)C(F)(F)C(F)(F)C(F)(F)C(F)(F)C(F)(F)C(F)(F)C(F)(F)F)CC(O)=O
257	2089109-27-1	Other fluorotelomer-based non-polymers		1-Dodecanaminium, N-(carboxymethyl)-3,3,4,4,5,5,6,6,7,7,8,8,9,9,10,10,11,11,12,12,12-heneicosafluoro-N,N-dimethyl-	YES			DTXSID401032589	DTXCID601519341	(Carboxylatomethyl)[(henicosafluorodecyl)ethyl]dimethylazanium	2089109-27-1	Single Compound	C[N+](C)(CCC(F)(F)C(F)(F)C(F)(F)C(F)(F)C(F)(F)C(F)(F)C(F)(F)C(F)(F)C(F)(F)C(F)(F)F)CC([O-])=O
258	145441-32-3	Other fluorotelomer-based non-polymers		1-Decanaminium, N-(carboxymethyl)-3,3,4,4,5,5, 6,6,7,7,8,8,9,9,10,10,10-heptadecafluoro-N,N-dimethyl-, inner salt	YES			DTXSID701032764	DTXCID401517787	8:2 Fluorotelomer betaine ion	145441-32-3	Single Compound	C[N+](C)(CCC(F)(F)C(F)(F)C(F)(F)C(F)(F)C(F)(F)C(F)(F)C(F)(F)C(F)(F)F)CC([O-])=O
259	171184-16-0	Other fluorotelomer-based non-polymers		1-Dodecanaminium, N-(carboxymethyl)-4,4,5,5,6,6,7,7,8,8,9,9,10,10,11,11,12,12,12-nonadecafluoro-N,N-dimethyl-, inner salt	YES			DTXSID80892521	DTXCID101079716	9:3 Fluorotelomer betaine	171184-16-0	Single Compound	C[N+](C)(CCCC(F)(F)C(F)(F)C(F)(F)C(F)(F)C(F)(F)C(F)(F)C(F)(F)C(F)(F)C(F)(F)F)CC([O-])=O
260	171184-17-1	Other fluorotelomer-based non-polymers		1-Tetradecanaminium, N-(carboxymethyl)-4,4,5,5,6,6,7,7,8,8,9,9,10,10,11,11,12,12,13,13,14,14,14-tricosafluoro-N,N-dimethyl-, inner salt	YES			DTXSID80892566	DTXCID601079759	11:3 Fluorotelomer betaine	171184-17-1	Single Compound	C[N+](C)(CCCC(F)(F)C(F)(F)C(F)(F)C(F)(F)C(F)(F)C(F)(F)C(F)(F)C(F)(F)C(F)(F)C(F)(F)C(F)(F)F)CC([O-])=O
261	171184-04-6	Other fluorotelomer-based non-polymers		1-Dodecanaminium, N-(carboxymethyl)-3,4,4,5,5,6,6,7,7,8,8,9,9,10,10,11,11,12,12,12-eicosafluoro-N,N-dimethyl-, inner salt	YES			DTXSID20892520	DTXCID401079715	9:1:2 Fluorotelomer betaine	171184-04-6	Mixture of Stereoisomers	C[N+](C)(CCC(F)C(F)(F)C(F)(F)C(F)(F)C(F)(F)C(F)(F)C(F)(F)C(F)(F)C(F)(F)C(F)(F)F)CC([O-])=O
262	2089109-30-6	Other fluorotelomer-based non-polymers		1-Dodecanaminium, N-(carboxymethyl)-5,5,6,6, 7,7,8,8,9,9,10,10,11,11,12,12,12-heptadeca fluoro-N,N-dimethyl-	YES			DTXSID701032590	DTXCID901519340	(Carboxylatomethyl)[(heptadecafluorooctyl)butyl]dimethylazanium	2089109-30-6	Single Compound	C[N+](C)(CCCCC(F)(F)C(F)(F)C(F)(F)C(F)(F)C(F)(F)C(F)(F)C(F)(F)C(F)(F)F)CC([O-])=O
263	80234-03-3	Other fluorotelomer-based non-polymers		1-Undecanaminium, 2-(acetyloxy)-N-(carboxy methyl)-4,4,5,5,6,6,7,7,8,8,9,9,10,10,11,11,11-heptadecafluoro-N,N-dimethyl-, inner salt	YES			DTXSID101033669	DTXCID401518523	2‐{[2‐(Acetyloxy)‐3-(perfluorooctyl)propyl]dimethylazaniumyl}acetate	80234-03-3	Mixture of Stereoisomers	CC(=O)OC(CC(F)(F)C(F)(F)C(F)(F)C(F)(F)C(F)(F)C(F)(F)C(F)(F)C(F)(F)F)C[N+](C)(C)CC([O-])=O
264	80244-66-2	Other fluorotelomer-based non-polymers		1-Tridecanaminium, 2-(acetyloxy)-N-(carboxy methyl)-4,4,5,5,6,6,7,7,8,8,9,9,10,10,11,11,12,12,13,13,13-heneicosafluoro-N,N-dimethyl-, inner salt	YES			DTXSID101033671	DTXCID801518525	2‐{[2‐(Acetyloxy)‐3-(perfluorodecyl)propyl]dimethylazaniumyl}acetate	80244-66-2	Mixture of Stereoisomers	CC(=O)OC(CC(F)(F)C(F)(F)C(F)(F)C(F)(F)C(F)(F)C(F)(F)C(F)(F)C(F)(F)C(F)(F)C(F)(F)F)C[N+](C)(C)CC([O-])=O
265	34143-74-3	Other fluorotelomer-based non-polymers		1-Decanethiol, 3,3,4,4,5,5,6,6,7,7,8,8,9,9,10,10,10-heptadecafluoro-	YES			DTXSID20337446	DTXCID10288534	2-(Perfluorooctyl)ethanthiol	34143-74-3	Single Compound	FC(F)(F)C(F)(F)C(F)(F)C(F)(F)C(F)(F)C(F)(F)C(F)(F)C(F)(F)CCS
266	76830-13-2	Other fluorotelomer-based non-polymers		2-Propenamide, telomer with 3,3,4,4,5,5,6,6,7,7,8,8,9,9,10,10,10-heptadecafluoro-1-decanethiol	YES			DTXSID701044078		2-Propenamide, telomer with 2-(perfluorooctyl)ethanthiol	76830-13-2	Polymer
267	121913-10-8	Other fluorotelomer-based non-polymers		2-Propenamide, telomer with 3,3,4,4,5,5,6,6,7,7,8,8,9,9,10,10,11,11,12,12,12-heneicosafluoro-1-dodecanethiol	YES			DTXSID901044074		2-Propenamide, telomer with 2-(perfluorodecyl)ethanethiol	121913-10-8	Polymer
268	39108-34-4	Other fluorotelomer-based non-polymers	8:2 FTSA	1-Decanesulfonic acid, 3,3,4,4,5,5,6,6,7,7,8,8,9, 9,10,10,10-heptadecafluoro-	YES			DTXSID00192353	DTXCID10114844	8:2 Fluorotelomer sulfonic acid	39108-34-4	Single Compound	OS(=O)(=O)CCC(F)(F)C(F)(F)C(F)(F)C(F)(F)C(F)(F)C(F)(F)C(F)(F)C(F)(F)F
269	120226-60-0	Other fluorotelomer-based non-polymers	10:2 FTSA	1-Dodecanesulfonic acid, 3,3,4,4,5,5,6,6,7,7,8, 8,9,9,10,10,11,11,12,12,12-heneicosafluoro-	YES			DTXSID50892578	DTXCID601079773	10:2 Fluorotelomer sulfonic acid	120226-60-0	Single Compound	OS(=O)(=O)CCC(F)(F)C(F)(F)C(F)(F)C(F)(F)C(F)(F)C(F)(F)C(F)(F)C(F)(F)C(F)(F)C(F)(F)F
270	438237-73-1	Other fluorotelomer-based non-polymers	8:2 FTSA-K	1-Decanesulfonic acid, 3,3,4,4,5,5,6,6,7,7,8,8,9,9,10,10,10-heptadecafluoro-, potassium salt (1:1)	YES			DTXSID501032920	DTXCID301517946	Potassium 2-(perfluorooctyl)ethane-1‐sulfonate	438237-73-1	Single Compound	[K+].[O-]S(=O)(=O)CCC(F)(F)C(F)(F)C(F)(F)C(F)(F)C(F)(F)C(F)(F)C(F)(F)C(F)(F)F
271	63225-57-0	Other fluorotelomer-based non-polymers		1-Decanol, 3,3,4,4,5,5,6,6,7,7,8,8,9,9,10,10,10-hepta decafluoro-, 1-(hydrogen sulfate), ammonium salt (1:1)	YES			DTXSID40897552	DTXCID201326900	1H,1H,2H,2H-Perfluorodecanol sulfate ammonium salt	63225-57-0	Single Compound	[NH4+].[O-]S(=O)(=O)OCCC(F)(F)C(F)(F)C(F)(F)C(F)(F)C(F)(F)C(F)(F)C(F)(F)C(F)(F)F
272	63225-58-1	Other fluorotelomer-based non-polymers		1-Dodecanol, 3,3,4,4,5,5,6,6,7,7,8,8,9,9,10,10,11,11,12,12,12-heneicosafluoro-, 1-(hydrogen sulfate), ammonium salt (1:1)	YES			DTXSID80897551	DTXCID401326899	1H,1H,2H,2H-Perfluorododecanol sulfate ammonium salt	63225-58-1	Single Compound	[NH4+].[O-]S(=O)(=O)OCCC(F)(F)C(F)(F)C(F)(F)C(F)(F)C(F)(F)C(F)(F)C(F)(F)C(F)(F)C(F)(F)C(F)(F)F
273	54950-06-0	Other fluorotelomer-based non-polymers		Butanedioic acid, 2-sulfo-, 1,4-bis(3,3,4,4,5,5,6,6,7,7,8,8,9,9,10,10,10-heptadecafluorodecyl) ester, sodium salt (1:1)	YES			DTXSID201033050	DTXCID501518083	Sodium 1,4‐bis[(perfluorooctyl)ethoxy]‐1,4‐dioxobutane‐2‐sulfonate	54950-06-0	Single Compound	[Na+].[O-]S(=O)(=O)C(CC(=O)OCCC(F)(F)C(F)(F)C(F)(F)C(F)(F)C(F)(F)C(F)(F)C(F)(F)C(F)(F)F)C(=O)OCCC(F)(F)C(F)(F)C(F)(F)C(F)(F)C(F)(F)C(F)(F)C(F)(F)C(F)(F)F
274	441765-12-4	Other fluorotelomer-based non-polymers		Acetic acid, 2-[(3,3,4,4,5,5,6,6,7,7,8,8,9,9,10,10,10-heptadecafluorodecyl)thio]-, lithium salt (1:1)	YES			DTXSID901032922	DTXCID701517948	Lithium 2‐[(perfluorooctyl)ethylsulfanyl]acetate	441765-12-4	Single Compound	[Li+].[O-]C(=O)CSCCC(F)(F)C(F)(F)C(F)(F)C(F)(F)C(F)(F)C(F)(F)C(F)(F)C(F)(F)F
275	54207-62-4	Other fluorotelomer-based non-polymers		Propanoic acid, 3-[(3,3,4,4,5,5,6,6,7,7,8,8,9,9,10,10,10-heptadecafluorodecyl)thio]-	YES			DTXSID20892601	DTXCID401284633	8:2:2 Fluorotelomer thioether propanoic acid	54207-62-4	Single Compound	OC(=O)CCSCCC(F)(F)C(F)(F)C(F)(F)C(F)(F)C(F)(F)C(F)(F)C(F)(F)C(F)(F)F
276	481050-04-8	Other fluorotelomer-based non-polymers		Propanoic acid, 3-[(3,3,4,4,5,5,6,6,7,7,8,8,9,9,10,10,10-heptadecafluorodecyl)thio]-, lithium salt (1:1)	YES			DTXSID001032937	DTXCID401517963	Lithium 3‐[(perfluorooctyl)ethylsulfanyl]propanoate	481050-04-8	Single Compound	[Li+].[O-]C(=O)CCSCCC(F)(F)C(F)(F)C(F)(F)C(F)(F)C(F)(F)C(F)(F)C(F)(F)C(F)(F)F
277	441765-14-6	Other fluorotelomer-based non-polymers		Ethanesulfonic acid, 2-[(3,3,4,4,5,5,6,6,7,7,8,8,9,9,10,10,10-heptadecafluorodecyl)thio]-, lithium salt (1:1)	YES			DTXSID301032924	DTXCID701517950	2-[(Perfluorooctyl)ethylthio]ethanesulfonic acid lithium salt	441765-14-6	Single Compound	[Li+].[O-]S(=O)(=O)CCSCCC(F)(F)C(F)(F)C(F)(F)C(F)(F)C(F)(F)C(F)(F)C(F)(F)C(F)(F)F
278	160819-47-6	Other fluorotelomer-based non-polymers		2-Propanol, 1,3-bis[(3,3,4,4,5,5,6,6,7,7,8,8, 9,9,10,10,10-heptadecafluorodecyl)thio]-	YES			DTXSID101032942	DTXCID901517968	1,3-Bis[(perfluorooctyl)ethylthio]-2-propanol	160819-47-6	Single Compound	OC(CSCCC(F)(F)C(F)(F)C(F)(F)C(F)(F)C(F)(F)C(F)(F)C(F)(F)C(F)(F)F)CSCCC(F)(F)C(F)(F)C(F)(F)C(F)(F)C(F)(F)C(F)(F)C(F)(F)C(F)(F)F
279	160819-50-1	Other fluorotelomer-based non-polymers		2-Propanol, 1-[(2-dodecylhexadecyl)oxy]-3-[(3,3,4,4,5,5,6,6,7,7,8,8,9,9,10,10,10-heptadecafluorodecyl)thio]-	YES			DTXSID501032944	DTXCID601517971	1-[(2-Dodecylhexadecyl)oxy]-3-[(perfluorooctyl)ethylthio]-2-propanol	160819-50-1	Mixture of Stereoisomers	CCCCCCCCCCCCCCC(CCCCCCCCCCCC)COCC(O)CSCCC(F)(F)C(F)(F)C(F)(F)C(F)(F)C(F)(F)C(F)(F)C(F)(F)C(F)(F)F
280	160819-49-8	Other fluorotelomer-based non-polymers		2-Propanol, 1-[(2-decyltetradecyl)oxy]-3-[(3,3,4,4,5,5,6,6,7,7,8,8,9,9,10,10,10-heptadecafluorodecyl)thio]-	YES			DTXSID801032943	DTXCID901517970	1-[(2-Decyltetradecyl)oxy]-3-[(perfluorooctyl)ethylthio]-2-propanol	160819-49-8	Mixture of Stereoisomers	CCCCCCCCCCCCC(CCCCCCCCCC)COCC(O)CSCCC(F)(F)C(F)(F)C(F)(F)C(F)(F)C(F)(F)C(F)(F)C(F)(F)C(F)(F)F
281	121912-28-5	Other fluorotelomer-based non-polymers		2,5,8,11,14,17,20,23-Octaoxa-27-thiaheptatria contan-25-ol, 30,30,31,31,32,32,33,33,34,34,35, 35,36,36,37,37,37-heptadecafluoro-	YES			DTXSID701032526	DTXCID101517540	29-(Perfluorooctyl)-2,5,8,11,14,17,20,23-octaoxa-27-thianonaicosan-25-ol	121912-28-5	Mixture of Stereoisomers	COCCOCCOCCOCCOCCOCCOCCOCC(O)CSCCC(F)(F)C(F)(F)C(F)(F)C(F)(F)C(F)(F)C(F)(F)C(F)(F)C(F)(F)F
282	727351-53-3	Other fluorotelomer-based non-polymers	8:2 FTSHA	1-Propanaminium, 2-hydroxy-N,N,N-trimethyl-3-[(3,3,4,4,5,5,6,6,7,7,8,8,9,9,10,10,10-heptadecafluorodecyl)thio]-	YES			DTXSID50892598	DTXCID301284630	8:2 Fluorotelomer thioether hydroxyammonium	727351-53-3	Mixture of Stereoisomers	C[N+](C)(C)CC(O)CSCCC(F)(F)C(F)(F)C(F)(F)C(F)(F)C(F)(F)C(F)(F)C(F)(F)C(F)(F)F
283	1513864-17-9	Other fluorotelomer-based non-polymers	10:2 FTSHA	1-Propanaminium, 2-hydroxy-N,N,N-trimethyl-3-[(3,3,4,4,5,5,6,6,7,7,8,8,9,9,10,10,11,11,12,12,12-heneicosafluorododecyl)sulfinyl]-	YES			DTXSID601036094	DTXCID601520314	[3-(2-(Perfluorodecyl)ethylsulfanyl)-2-hydroxypropyl]-trimethylazanium	1513864-17-9	Mixture of Stereoisomers	C[N+](C)(C)CC(O)CSCCC(F)(F)C(F)(F)C(F)(F)C(F)(F)C(F)(F)C(F)(F)C(F)(F)C(F)(F)C(F)(F)C(F)(F)F
284	71940-07-3	Other fluorotelomer-based non-polymers		1-Propanaminium, 2-hydroxy-N,N,N-trimethyl-3-[(3,3,4,4,5,5,6,6,7,7,8,8,9,9,10,10,10-heptadecafluorodecyl)thio]-, chloride (1:1)	YES			DTXSID10892599	DTXCID001284631	8:2 Fluorotelomer thioether hydroxyammonium chloride	71940-07-3	Mixture of Stereoisomers	[Cl-].C[N+](C)(C)CC(O)CSCCC(F)(F)C(F)(F)C(F)(F)C(F)(F)C(F)(F)C(F)(F)C(F)(F)C(F)(F)F
285		Other fluorotelomer-based non-polymers		1-Propanaminium, 2-hydroxy-N,N,N-trimethyl-3-[(3,3,4,4,5,5,6,6,7,7,8,8,9,9,10,10,11,11,12,12, 12-heneicosafluorododecyl)thio]-, chloride (1:1)	YES			DTXSID601335074	DTXCID401764736	2-Hydroxy-N,N,N-trimethyl-3-[((perfluorodecyl)ethyl)thio]-1-propanaminium chloride	NOCAS_1335074	Single Compound	[Cl-].C[N+](C)(C)CC(O)CSCCC(F)(F)C(F)(F)C(F)(F)C(F)(F)C(F)(F)C(F)(F)C(F)(F)C(F)(F)C(F)(F)C(F)(F)F
286	71625-52-0	Other fluorotelomer-based non-polymers		Ethanaminium, 2-[2-[(3,3,4,4,5,5,6,6,7,7,8,8,9,9,10,10,10-heptadecafluorodecyl)thio]ethoxy]-N,N,N-trimethyl-, iodide (1:1)	YES			DTXSID801033527	DTXCID101518431	2-[2-[(Perfluorooctyl)ethylthio]ethoxy]-N,N,N-trimethyl ethanaminium iodide (1:1)	71625-52-0	Single Compound	[I-].C[N+](C)(C)CCOCCSCCC(F)(F)C(F)(F)C(F)(F)C(F)(F)C(F)(F)C(F)(F)C(F)(F)C(F)(F)F
287	1513863-91-6	Other fluorotelomer-based non-polymers		Acetamide, N-[3-(dimethylamino)propyl]-2-[(3,3,4,4,5,5,6,6,7,7,8,8,9,9,10,10,10-heptadecafluorodecyl)thio]-	YES			DTXSID901032803	DTXCID401517820	N-[3-(Dimethylamino)propyl]-2-[(perfluorooctyl)ethylthio]acetamide	1513863-91-6	Single Compound	CN(C)CCCNC(=O)CSCCC(F)(F)C(F)(F)C(F)(F)C(F)(F)C(F)(F)C(F)(F)C(F)(F)C(F)(F)F
288	1513863-92-7	Other fluorotelomer-based non-polymers		Acetamide, N-[3-(dimethylamino)propyl]-2-[(3,3,4,4,5,5,6,6,7,7,8,8,9,9,10,10,11,11,12, 12,12-heneicosafluorododecyl) thio]-	YES			DTXSID301032805	DTXCID801517822	N-[3-(Dimethylamino)propyl]-2-[(perfluorodecyl)ethylthio]acetamide	1513863-92-7	Single Compound	CN(C)CCCNC(=O)CSCCC(F)(F)C(F)(F)C(F)(F)C(F)(F)C(F)(F)C(F)(F)C(F)(F)C(F)(F)C(F)(F)C(F)(F)F
289	704870-51-9	Other fluorotelomer-based non-polymers		1-Propanaminium, 3-[[2-[(3,3,4,4,5,5,6,6,7,7,8,8, 9,9,10,10,10-heptadecafluorodecyl)thio]acetyl] amino]-N,N,N-trimethyl-	YES			DTXSID201033498	DTXCID201518408	3-[[2-[(Perfluorooctyl)ethylthio]acetyl]amino]-N,N,N-trimethyl-1-propanaminium	704870-51-9	Single Compound	C[N+](C)(C)CCCNC(=O)CSCCC(F)(F)C(F)(F)C(F)(F)C(F)(F)C(F)(F)C(F)(F)C(F)(F)C(F)(F)F
290	1513864-01-1	Other fluorotelomer-based non-polymers		1-Propanaminium, 3-[[2-[(3,3,4,4,5,5,6,6,7,7,8,8, 9,9,10,10,11,11,12,12,12-heneicosafluorodo decyl)thio]acetyl]amino]-N,N,N-trimethyl-	YES			DTXSID301032817	DTXCID501517835	3-[[2-[(Perfluorodecyl)ethylthio]acetyl]amino]-N,N,N-trimethyl-1-propanaminium	1513864-01-1	Single Compound	C[N+](C)(C)CCCNC(=O)CSCCC(F)(F)C(F)(F)C(F)(F)C(F)(F)C(F)(F)C(F)(F)C(F)(F)C(F)(F)C(F)(F)C(F)(F)F
291	67333-62-4	Other fluorotelomer-based non-polymers		1-Propanaminium, N-ethyl-3-[[3-[(3,3,4,4,5, 5,6,6,7,7,8,8,9,9,10,10,10-heptadecafluorodecyl) thio]-2-methyl-1-oxopropyl]amino]-N,N-dimethyl-, ethyl sulfate (1:1)	YES			DTXSID301033477	DTXCID201518391	10-(Perfluorooctyl)-8-thia-6-methyl-5-oxo-4-aza-N,N-dimethyl-N-ethyl-decanaminium ethyl sulfate (1:1)	67333-62-4	Single Compound	CCOS([O-])(=O)=O.CC[N+](C)(C)CCCNC(=O)C(C)CSCCC(F)(F)C(F)(F)C(F)(F)C(F)(F)C(F)(F)C(F)(F)C(F)(F)C(F)(F)F
292	1513863-96-1	Other fluorotelomer-based non-polymers	8:2 FTSAB	1-Propanaminium, N-(carboxymethyl)-3-[[2-[(3,3,4,4,5,5,6,6,7,7,8,8,9,9,10,10,10-heptadecafluorodecyl)thio]acetyl] amino]-N,N-dimethyl-, inner salt	YES			DTXSID00892604	DTXCID201284637	8:2 Fluorotelomer thioether amido betaine	1513863-96-1	Single Compound	C[N+](C)(CCCNC(=O)CSCCC(F)(F)C(F)(F)C(F)(F)C(F)(F)C(F)(F)C(F)(F)C(F)(F)C(F)(F)F)CC([O-])=O
293	1513863-97-2	Other fluorotelomer-based non-polymers	10:2 FTSAB	1-Propanaminium, N-(carboxymethyl)-3-[[2-[(3,3,4,4,5,5,6,6,7,7,8,8,9,9,10,10,11,11,12,12,12-heneicosafluorododecyl) thio]acetyl] amino]-N,N-dimethyl-, inner salt	YES			DTXSID10892579	DTXCID201132656	10:2 Fluorotelomer thioether amido betaine	1513863-97-2	Single Compound	C[N+](C)(CCCNC(=O)CSCCC(F)(F)C(F)(F)C(F)(F)C(F)(F)C(F)(F)C(F)(F)C(F)(F)C(F)(F)C(F)(F)C(F)(F)F)CC([O-])=O
294	1383438-89-8	Other fluorotelomer-based non-polymers		Butanoic acid, 4-[[3-(dimethylamino)propyl] amino]-2-[(3,3,4,4,5,5,6,6,7,7,8,8,9,9,10,10,10-heptadecafluorodecyl) thio]-4-oxo-	YES			DTXSID30892596	DTXCID701278257	8:2 Fluorotelomer thioether amido amine carboxylic acid	1383438-89-8	Mixture of Stereoisomers	CN(C)CCCNC(=O)CC(SCCC(F)(F)C(F)(F)C(F)(F)C(F)(F)C(F)(F)C(F)(F)C(F)(F)C(F)(F)F)C(O)=O
295	1383438-90-1	Other fluorotelomer-based non-polymers		Butanoic acid, 4-[[3-(dimethylamino)propyl] amino]-2-[(3,3,4,4,5,5,6,6,7,7,8,8,9,9,10,10,11,11,12,12,12-heneicosa fluorododecyl)thio]-4-oxo-	YES			DTXSID60892589	DTXCID201267291	10:2 Fluorotelomer thioether amido amine carboxylic acid	1383438-90-1	Mixture of Stereoisomers	CN(C)CCCNC(=O)CC(SCCC(F)(F)C(F)(F)C(F)(F)C(F)(F)C(F)(F)C(F)(F)C(F)(F)C(F)(F)C(F)(F)C(F)(F)F)C(O)=O
296	93128-66-6	Other fluorotelomer-based non-polymers		Glycine, N-[3-[(3,3,4,4,5,5,6,6,7,7,8,8,9,9,10,10,10-heptadecafluorodecyl)thio]-2-hydroxypropyl]-N-methyl-	YES			DTXSID70896119	DTXCID301325612	N-{3-[2-(Perfluorooctyl)ethylsulfanyl]-2-hydroxypropyl}-N-methylglycine	93128-66-6	Single Compound	CN(CC(O)CSCCC(F)(F)C(F)(F)C(F)(F)C(F)(F)C(F)(F)C(F)(F)C(F)(F)C(F)(F)F)CC(O)=O
297	755698-73-8	Other fluorotelomer-based non-polymers	8:2 FTSAS	1-Propanesulfonic acid, 2-[[3-[(3,3,4,4,5,5,6,6,7,7,8,8,9,9,10,10,10-heptadecafluorodecyl)thio]-1-oxopropyl]amino]-2-methyl-	YES			DTXSID30892334	DTXCID601079492	8:2 Fluorotelomer thioether amido sulfonic acid	755698-73-8	Single Compound	CC(C)(CS(O)(=O)=O)NC(=O)CCSCCC(F)(F)C(F)(F)C(F)(F)C(F)(F)C(F)(F)C(F)(F)C(F)(F)C(F)(F)F
298	690947-60-5	Other fluorotelomer-based non-polymers	10:2 FTSAS	1-Propanesulfonic acid, 2-[[3-[(3,3,4,4,5,5,6,6,7,7,8,8,9,9,10,10,11,11,12,12,12-heneicosafluoro dodecyl)thio]-1-oxopropyl] amino]-2-methyl-	YES			DTXSID60892584	DTXCID401147265	10:2 Fluorotelomer thioether amido sulfonic acid	690947-60-5	Single Compound	CC(C)(CS(O)(=O)=O)NC(=O)CCSCCC(F)(F)C(F)(F)C(F)(F)C(F)(F)C(F)(F)C(F)(F)C(F)(F)C(F)(F)C(F)(F)C(F)(F)F
299	62880-96-0	Other fluorotelomer-based non-polymers		1-Propanesulfonic acid, 2-[[3-[(3,3,4,4,5,5,6,6,7,7,8,8,9,9,10,10,10-heptadecafluorodecyl)thio]-1-oxopropyl]amino]-2-methyl-, sodium salt (1:1)	YES			DTXSID201033343	DTXCID401518323	Sodium 2-[[3-[(perfluorooctyl)ethylthio]-1-oxopropyl]amino]-2-methyl-1-propanesulfonate	62880-96-0	Single Compound	[Na+].CC(C)(CS([O-])(=O)=O)NC(=O)CCSCCC(F)(F)C(F)(F)C(F)(F)C(F)(F)C(F)(F)C(F)(F)C(F)(F)C(F)(F)F
300	62880-98-2	Other fluorotelomer-based non-polymers		1-Propanesulfonic acid, 2-[[3-[(3,3,4,4,5,5,6,6,7,7,8,8,9,9,10,10,11,11,12,12,12-heneicosafluoro dodecyl)thio]-1-oxopropyl]amino]-2-methyl-, sodium salt (1:1)	YES			DTXSID601033345	DTXCID801518325	Sodium 2-[[3-[(perfluorodecyl)ethylthio]-1-oxopropyl]amino]-2-methyl-1-propanesulfonate	62880-98-2	Single Compound	[Na+].CC(C)(CS([O-])(=O)=O)NC(=O)CCSCCC(F)(F)C(F)(F)C(F)(F)C(F)(F)C(F)(F)C(F)(F)C(F)(F)C(F)(F)C(F)(F)C(F)(F)F
301	1513864-19-1	Other fluorotelomer-based non-polymers		1-Propanaminium, 2-hydroxy-N,N,N-trimethyl-3-[(3,3,4,4,5,5,6,6,7,7,8,8,9,9,10,10,10-heptadecafluorodecyl)sulfinyl]-	YES			DTXSID10892594	DTXCID201276951	8:2 Fluorotelomer sulfoxide hydroxyammonium	1513864-19-1	Mixture of Stereoisomers	C[N+](C)(C)CC(O)CS(=O)CCC(F)(F)C(F)(F)C(F)(F)C(F)(F)C(F)(F)C(F)(F)C(F)(F)C(F)(F)F
302	1513864-12-4	Other fluorotelomer-based non-polymers		1-Propanesulfonic acid, 2-[[3-[(3,3,4,4,5,5,6,6,7,7,8,8,9,9,10,10,10-heptadecafluorodecyl) sulfinyl]-1-oxopropyl]amino]-2-methyl-	YES			DTXSID60892605	DTXCID901284638	8:2 Fluorotelomer sulfoxide amido sulfonic acid	1513864-12-4	Mixture of Stereoisomers	CC(C)(CS(O)(=O)=O)NC(=O)CCS(=O)CCC(F)(F)C(F)(F)C(F)(F)C(F)(F)C(F)(F)C(F)(F)C(F)(F)C(F)(F)F
303	1513864-11-3	Other fluorotelomer-based non-polymers		1-Propanesulfonic acid, 2-[[3-[(3,3,4,4,5,5,6,6,7,7,8,8,9,9,10,10,11,11,12,12,12-heneicosafluoro dodecyl)sulfinyl]-1-oxopropyl]amino]-2-methyl-	YES			DTXSID701032821	DTXCID301517839	2-[[3-[(Perfluorodecyl)ethylsulfinyl]-1-oxopropyl]amino]-2-methyl-1-propanesulfonic acid	1513864-11-3	Single Compound	CC(C)(CS(O)(=O)=O)NC(=O)CCS(=O)CCC(F)(F)C(F)(F)C(F)(F)C(F)(F)C(F)(F)C(F)(F)C(F)(F)C(F)(F)C(F)(F)C(F)(F)F
304	80475-33-8	Other fluorotelomer-based non-polymers		1-Decanesulfonamide, N-[3-(dimethyloxido amino)propyl]-3,3,4,4,5,5,6,6,7,7,8,8,9,9, 10,10,10-heptadecafluoro-	YES			DTXSID301033677	DTXCID601518529	N-[3-(N,N-Dimethyl-N-oxidoamino)propyl]-2-(perfluorooctyl)ethanesulfonamide	80475-33-8	Single Compound	C[N+](C)([O-])CCCNS(=O)(=O)CCC(F)(F)C(F)(F)C(F)(F)C(F)(F)C(F)(F)C(F)(F)C(F)(F)C(F)(F)F
305	34455-23-7	Other fluorotelomer-based non-polymers		1-Decanesulfonamide, N-[3-(dimethylamino) propyl]-3,3,4,4,5,5,6,6,7,7,8,8,9,9,10,10,10-heptadecafluoro-	YES			DTXSID60892524	DTXCID201079719	8:2 Fluorotelomer sulfonamido N,N-dimethyl amine	34455-23-7	Single Compound	[H]N(CCCN(C)C)S(=O)(=O)CCC(F)(F)C(F)(F)C(F)(F)C(F)(F)C(F)(F)C(F)(F)C(F)(F)C(F)(F)F
306	34455-24-8	Other fluorotelomer-based non-polymers		1-Dodecanesulfonamide, N-[3-(dimethylamino) propyl]-3,3,4,4,5,5,6,6,7,7,8,8,9,9,10,10,11,11,12,12,12-heneicosafluoro-	YES			DTXSID80892607	DTXCID901284640	10:2 Fluorotelomer sulfonamido N,N-dimethyl amine	34455-24-8	Single Compound	[H]N(CCCN(C)C)S(=O)(=O)CCC(F)(F)C(F)(F)C(F)(F)C(F)(F)C(F)(F)C(F)(F)C(F)(F)C(F)(F)C(F)(F)C(F)(F)F
307	438237-77-5	Other fluorotelomer-based non-polymers		1-Propanaminium, 3-[[(3,3,4,4,5,5,6,6,7,7,8,8, 9,9,10,10,10-heptadecafluorodecyl)sulfonyl] amino]-N,N,N-trimethyl-, 4-methylbenzene sulfonate (1:1)	YES			DTXSID40882827	DTXCID901493215	3-[((Perfluorooctyl)ethyl)sulfonyl]amino-N,N,N-trimethyl-1-propanaminium 4-methylbenzenesulfonate	438237-77-5	Single Compound	CC1=CC=C(C=C1)S([O-])(=O)=O.C[N+](C)(C)CCCNS(=O)(=O)CCC(F)(F)C(F)(F)C(F)(F)C(F)(F)C(F)(F)C(F)(F)C(F)(F)C(F)(F)F
308	34455-21-5	Other fluorotelomer-based non-polymers	8:2 FTAB	1-Propanaminium, N-(carboxymethyl)-3-[[(3,3,4,4,5,5,6,6,7,7,8,8,9,9,10,10,10-heptadecafluorodecyl)sulfonyl]amino]-N,N-dimethyl-, inner salt	YES			DTXSID70880432	DTXCID101021874	8:2 Fluorotelomer sulfonamide betaine	34455-21-5	Single Compound	C[N+](C)(CCCNS(=O)(=O)CCC(F)(F)C(F)(F)C(F)(F)C(F)(F)C(F)(F)C(F)(F)C(F)(F)C(F)(F)F)CC([O-])=O
309	34455-35-1	Other fluorotelomer-based non-polymers	10:2 FTAB	1-Propanaminium, N-(carboxymethyl)-3-[[(3,3,4,4,5,5,6,6,7,7,8,8,9,9,10,10,11,11,12,12,12-heneicosafluorododecyl)sulfonyl]amino]-N,N-dimethyl-, inner salt	YES			DTXSID90880434	DTXCID501021876	10:2 Fluorotelomer sulfonamide betaine	34455-35-1	Single Compound	C[N+](C)(CCCNS(=O)(=O)CCC(F)(F)C(F)(F)C(F)(F)C(F)(F)C(F)(F)C(F)(F)C(F)(F)C(F)(F)C(F)(F)C(F)(F)F)CC([O-])=O
310	34695-29-9	Other fluorotelomer-based non-polymers		Ethanaminium, N-(2-carboxyethyl)-2-[[(3,3,4,4,5,5,6,6,7,7,8,8,9,9,10,10,10-heptadecafluoro decyl)sulfonyl]amino]-N,N-dimethyl-, inner salt	YES			DTXSID601032830	DTXCID501517847	3-[Dimethyl(2-{[(perfluorooctyl) sulfonyl]amino}ethyl)ammonio]propanoate	34695-29-9	Single Compound	C[N+](C)(CCNS(=O)(=O)CCC(F)(F)C(F)(F)C(F)(F)C(F)(F)C(F)(F)C(F)(F)C(F)(F)C(F)(F)F)CCC([O-])=O
311	34695-31-3	Other fluorotelomer-based non-polymers		Ethanaminium, N-(2-carboxyethyl)-2-[[(3,3,4,4,5,5,6,6,7,7,8,8,9,9,10,10,11,11,12,12,12-heneicosafluorododecyl) sulfonyl]amino]-N,N-dimethyl-, inner salt	YES			DTXSID001032832	DTXCID901517849	2-Carboxy-N,N-dimethyl-N-[2-[[(perfluorodecyl)- sulfonyl ]amino]ethyl]-, ethanaminum inner salt	34695-31-3	Single Compound	C[N+](C)(CCNS(=O)(=O)CCC(F)(F)C(F)(F)C(F)(F)C(F)(F)C(F)(F)C(F)(F)C(F)(F)C(F)(F)C(F)(F)C(F)(F)F)CCC([O-])=O
312	441765-18-0	Other fluorotelomer-based non-polymers		Glycine, N-[(3,3,4,4,5,5,6,6,7,7,8,8,9,9,10,10,10-heptadecafluorodecyl)sulfonyl]-N-propyl-, lithium salt	YES			DTXSID401032927	DTXCID801517953	N-[(Perfluorooctyl)ethylsulfonyl]-N-propylglycine lithium salt	441765-18-0	Single Compound	[Li+].CCCN(CC([O-])=O)S(=O)(=O)CCC(F)(F)C(F)(F)C(F)(F)C(F)(F)C(F)(F)C(F)(F)C(F)(F)C(F)(F)F
313	98900-53-9	Other fluorotelomer-based non-polymers		β-Alanine, N-(2-carboxyethyl)-N-[6-[[(3,3,4,4, 5,5,6,6,7,7,8,8,9,9,10,10,10-heptadecafluoro decyl)sulfonyl]amino]hexyl]-, dipotassium salt	YES			DTXSID501034338	DTXCID001518969	Dipotassium N-(2-Carboxyethyl)-N-[6-[2-(perfluorooctyl)ethanesulfonylamino]hexyl]-beta-alanine salt	98900-53-9	Single Compound	[K+].[K+].[O-]C(=O)CCN(CCCCCCNS(=O)(=O)CCC(F)(F)C(F)(F)C(F)(F)C(F)(F)C(F)(F)C(F)(F)C(F)(F)C(F)(F)F)CCC([O-])=O
314	115592-83-1	Fluorotelomer-based side-chain fluorinated polymers		2-Propenoic acid, 3,3,4,4,5,5,6,6,7,7,8,8,9,9,10,10,11,11,12,12,12-heneicosafluorododecyl ester, polymer with 3,3,4,4,5,5,6,6,7,7,8,8,9,9,10,10,10-heptadecafluorodecyl 2-propenoate, hexadecyl 2-propenoate, N-(hydroxymethyl)-2-propenamide, octadecyl 2-propenoate, 3,3,4,4,5,5,6,6,7,7,8,8,9,9,10,10,11,11,12,12,13,13,14,14,14-pentacosafluorotetradecyl 2-propenoate and 3,3,4,4,5,5,6,6,7,7,8,8,8-tridec…	YES			DTXSID00882580		2-(Perfluorodecyl)ethyl 2-propenoate polymer with 2-(Perfluorooctyl)ethyl 2-propenoate, Hexadecyl 2-propenoate, N-(Hydroxymethyl)-2-propenamide, Octadecyl 2-propenoate, 2-(Perfluorododecyl)ethyl 2-propenoate and 2-(Perfluorohexyl)ethyl 2-propenoate	115592-83-1	Mixture/Formulation
315	129783-45-5	Fluorotelomer-based side-chain fluorinated polymers		2-​Propenoic acid, 2-​methyl-​, C10-​16-​alkyl esters, polymers with 2-​hydroxyethyl methacrylate, Me methacrylate and γ-​ω-​perfluoro-​C8-​14-​alkyl acrylate	YES			DTXSID00882823		2-Methyl-2-propenoic acid C10-16-alkyl esters polymers with 2-hydroxyethyl methacrylate, Me methacrylate and .gamma.-.omega.-perfluoro-C8-14-alkyl acrylate	129783-45-5	Mixture/Formulation
316	144031-01-6	Fluorotelomer-based side-chain fluorinated polymers		2-​Propenoic acid, dodecyl ester, polymers with Bu (1-​oxo-​2-​propenyl)​carbamate and γ-​ω-​perfluoro-​C8-​14-​alkyl acrylate	YES			DTXSID30882952		2-Propenoic acid dodecyl ester polymers with Bu (1-oxo-2-propenyl)carbamate and .gamma.-.omega.-perfluoro-C8-14-alkyl acrylate	144031-01-6	Mixture/Formulation
317	116984-14-6	Fluorotelomer-based side-chain fluorinated polymers		2-Propenoic acid, 3,3,4,4,5,5,6,6,7,7,8,8,9,9,10,10,11,11,12,12,12-heneicosafluorododecyl ester, polymer with 3,3,4,4,5,5,6,6,7,7,8,8,9,9,10,10,10-heptadecafluorodecyl 2-propenoate, alpha-(2-methyl-1-oxo-2-propenyl)-omega-[(2-methyl-1-oxo-2-propenyl)oxy]poly(oxy-1, 2-ethanediyl), 3,3,4,4,5,5,6,6,7,7,8,8,9,9,10,10,11,11,12,12,13,13,14,14,15,15,16,16,16-nonacosafluorohexadecyl 2-propenoate, octadec…	YES			DTXSID20882562		116984-14-6 (name too long)	116984-14-6	Mixture/Formulation
318	74049-08-4	Fluorotelomer-based side-chain fluorinated polymers	PFOEA	Poly[2-(perfluorooctyl)ethyl acrylate]	YES			DTXSID001029613	Markush	Poly[2-(perfluorooctyl)ethyl acrylate]	74049-08-4	Polymer
319	65104-45-2	Fluorotelomer-based side-chain fluorinated polymers		2-Propenoic acid, 2-methyl-, 3,3,4,4,5,5,6,6,7,7,8,8,9,9,10,10,11,11,12,12,12-heneicosafluorododecyl ester, polymer with 3,3,4,4,5,5,6,6,7,7,8,8,9,9, 10,10,10-heptadecafluorodecyl 2-methyl-2-propenoate, methyl 2-methyl-2-propenoate,3,3,4,4,5,5,6,6,7,7,8,8,9,9,10,10,11,11,12,12,13,13,14,14,14-pentacosafluorotetradecyl 2-methyl-2-propenoate and 3,3,4,4,5,5,6,6, 7,7,8,8,8-tridecafluorooctyl 2-methyl…	YES			DTXSID80882588		2-(Perfluorodecyl)ethyl methacrylate polymer with 2-(Perfluorooctyl)ethyl methacrylate, methyl 2-methyl-2-propenoate, 2-(Perfluorododecyl)ethyl methacrylate and 2-(Perfluorohexyl)ethyl methacrylate	65104-45-2	Mixture/Formulation
320	53515-73-4	Fluorotelomer-based side-chain fluorinated polymers		2-Propenoic acid, 2-methyl-, 2,2,3,3,4,4,5,5,6,6,7,7,8,8,8-pentadecafluorooctyl ester, polymer with 2-propenoic acid	YES			DTXSID30880458		(Perfluoroheptyl)methyl 2-methyl-2-propenoate polymer with 2-propenoic acid	53515-73-4	Polymer
321	934505-67-6	Fluorotelomer-based side-chain fluorinated polymers		2-Propenoic acid, polymer with 2-ethenylnaphthalene and 4,4,5,5,6,6,7,7,8,8,9,9,10,10,11,11,11-heptadecafluoro-2-hydroxyundecyl 2-propenoate	YES			DTXSID901042947		2-Propenoic acid polymer with 2-ethenylnaphthalene and 3-(perfluorooctyl)-2-hydroxypropyl acrylate	934505-67-6	Mixture/Formulation
322	142636-88-2	Fluorotelomer-based side-chain fluorinated polymers		2-Propenoic acid, 2-methyl-, octadecyl ester, polymer with 3,3,4,4,5,5,6,6,7,7,8,8,9,9,10,10,11,11,12,12,12-heneicosafluorododecyl 2-propenoate, 3,3,4,4,5,5,6,6,7,7,8,8,9,9,10,10,10-heptadecafluorodecyl 2-propenoate and 3,3,4,4,5,5,6,6,7,7,8,8,9,9,10,10,11,11,12,12,13,13,14,14,14-pentacosafluorotetradecyl 2-propenoate	YES			DTXSID00882601		Octadecyl 2-methyl-2-propenoate, polymer with 2-(perfluorodecyl)ethyl acrylate, 2-(perfluorooctyl)ethyl acrylate and (perfluorododecyl)ethyl 2-propenoate	142636-88-2	Mixture/Formulation
323	90622-99-4	Other substances		Amides, C7-19, α-ω-perfluoro-N,N-bis(hydroxyethyl)	YES			DTXSID30881309	Markush	Perfluoroalkyl(C7-19)amides, N,N-bis(hydroxyethyl)	90622-99-4	Mixture/Formulation
324	71356-38-2	Other substances		Piperazinium, 1-(carboxymethyl)-1-(2-hydroxyethyl)-4-(2,2,3,3,4,4,5,5,6,6,7,7,8,8,9,9,10,10,10-nonadecafluoro-1-oxodecyl)-, inner salt	YES			DTXSID70880952	DTXCID901022288	1-(Carboxymethyl)-1-(2-hydroxyethyl)-4-(perfluoro-1-oxodecyl)piperazinium	71356-38-2	Single Compound	OCC[N+]1(CC([O-])=O)CCN(CC1)C(=O)C(F)(F)C(F)(F)C(F)(F)C(F)(F)C(F)(F)C(F)(F)C(F)(F)C(F)(F)C(F)(F)F
325	85681-64-7	Other substances		2-Propenoic acid, perfluoro-C8-16-alkyl esters	YES			DTXSID20881292	Markush	2-Propenoic acid, perfluoro-C8-16-alkyl esters	85681-64-7	Mixture/Formulation
326	125328-29-2	Other substances		2-Propenoic acid, 2-methyl-, C10-16-alkyl esters, polymers with 2-hydroxyethylmethacrylate, Me methacrylate and perfluoro-C8-14-alkyl acrylate	YES			DTXSID60882884		2-Methyl-2-propenoic acid C10-16-alkyl esters polymers with 2-hydroxyethyl methacrylate, Me methacrylate and perfluoro-C8-14-alkyl acrylate	125328-29-2	Mixture/Formulation
327	325459-92-5	Other substances		Phosphine, tris[4-(3,3,4,4,5,5,6,6,7,7,8,8,9,9,10,10,10-heptadecafluorodecyl)phenyl]-	YES			DTXSID10404732	DTXCID40355586	Tris[4-[(perfluorooctyl)ethyl]phenyl]phosphane	325459-92-5	Single Compound	FC(F)(F)C(F)(F)C(F)(F)C(F)(F)C(F)(F)C(F)(F)C(F)(F)C(F)(F)CCC1=CC=C(C=C1)P(C1=CC=C(CCC(F)(F)C(F)(F)C(F)(F)C(F)(F)C(F)(F)C(F)(F)C(F)(F)C(F)(F)F)C=C1)C1=CC=C(CCC(F)(F)C(F)(F)C(F)(F)C(F)(F)C(F)(F)C(F)(F)C(F)(F)C(F)(F)F)C=C1
328	326475-46-1	Other substances		Palladium, dichlorobis[tris[4-​(3,​3,​4,​4,​5,​5,​6,​6,​7,​7,​8,​8,​9,​9,​10,​10,​10-​heptadecafluorodecyl​)​phenyl]​phosphine-​κP]​-	YES			DTXSID70897484	DTXCID301514459	Dichloropalladium bis{tris[4-(2-(perfluorooctyl)ethyl)phenyl]phosphane}	326475-46-1	Single Compound	F.Cl[Pd]Cl.FC(F)(F)C(F)(F)C(F)(F)C(F)(F)C(F)(F)C(F)(F)C(F)(F)C(F)(F)CCC1=CC=C(C=C1)P(C1=CC=C(CCC(F)(F)C(F)(F)C(F)(F)C(F)(F)C(F)(F)C(F)(F)C(F)(F)C(F)(F)F)C=C1)C1=CC=C(CCC(F)(F)C(F)(F)C(F)(F)C(F)(F)C(F)(F)C(F)(F)C(F)(F)C(F)(F)F)C=C1.FC(F)(F)C(F)(F)C(F)(F)C(F)(F)C(F)(F)C(F)(F)C(F)(F)C(F)(F)CCC1=CC=C(C=C1)P(C1=CC=C(CCC(F)(F)C(F)(F)C(F)(F)C(F)(F)C(F)(F)C(F)(F)C(F)(F)C(F)(F)F)C=C1)C1=CC=C(CCC(F)(F)C(F)…
329	39186-68-0	Other substances		1-Propanaminium, N-(2-carboxyethyl)-N,N-bis(2-hydroxyethyl)-3-[(2,2,3,3,4,4,5,5,6,6,7,7,8,8,8-pentadecafluoro-1-oxooctyl)amino]-, inner salt	YES			DTXSID70192426	DTXCID601764837	N-[2-Carboxylatoethyl)-N,N-bis(2-hydroxyethyl)-3-[(perfluoro-1-oxooctyl)amino]-1-propanaminium	39186-68-0	Single Compound	OCC[N+](CCO)(CCCNC(=O)C(F)(F)C(F)(F)C(F)(F)C(F)(F)C(F)(F)C(F)(F)C(F)(F)F)CCC([O-])=O
330	41358-63-8	Other substances		Octanamide, N-[3-[bis(2-hydroxyethyl)amino]propyl]-2,2,3,3,4,4,5,5,6,6,7,7,8,8,8-pentadecafluoro-	YES			DTXSID90194306	DTXCID60116797	N-(3-(Bis(2-hydroxyethyl)amino)propyl)-perfluorooctanamide	41358-63-8	Single Compound	OCCN(CCO)CCCNC(=O)C(F)(F)C(F)(F)C(F)(F)C(F)(F)C(F)(F)C(F)(F)C(F)(F)F
331	24216-05-5	Other substances		Benzenesulfonyl chloride, 3,4-bis[(2,2,3,3,4,4,5,5,6,6,7,7,8,8,8-pentadecafluoro-1-oxooctyl)amino]-	YES			DTXSID20178912	DTXCID80101403	3,4-Bis((perfluoro-1-oxooctyl)amino)benzenesulfonyl chloride	24216-05-5	Single Compound	FC(F)(F)C(F)(F)C(F)(F)C(F)(F)C(F)(F)C(F)(F)C(F)(F)C(=O)NC1=C(NC(=O)C(F)(F)C(F)(F)C(F)(F)C(F)(F)C(F)(F)C(F)(F)C(F)(F)F)C=C(C=C1)S(Cl)(=O)=O
332	53517-98-9	Other substances		1-Propanaminium,N,N,N-trimethyl-3- [(2,2,3,3,4,4,5,5,6,6,7,7,8,8,8-pentadecafluoro-1-oxooctyl) amino]-, chloride (1:1)	YES			DTXSID90880459	DTXCID901021892	N,N,N-trimethyl-3-[(perfluorooctanoyl)amino]-1-propanaminium chloride	53517-98-9	Single Compound	[Cl-].C[N+](C)(C)CCCNC(=O)C(F)(F)C(F)(F)C(F)(F)C(F)(F)C(F)(F)C(F)(F)C(F)(F)F
333	335-90-0	Other substances		1-Propanaminium, N,N,N-trimethyl-3-[(2,2,3,3,4, 4,5,5,6,6,7,7,8,8,8-pentadecafluoro-1-oxooctyl) amino]-, iodide (1:1)	YES			DTXSID10721759	DTXCID401520837	N,N,N-Trimethyl-3-[(perfluorooctanoyl)amino]-1-propanaminium iodide	335-90-0	Single Compound	[I-].C[N+](C)(C)CCCNC(=O)C(F)(F)C(F)(F)C(F)(F)C(F)(F)C(F)(F)C(F)(F)C(F)(F)F
334	85938-56-3	Other substances		Octanamide, N-(3-aminopropyl)-2,2,3,3,4,4,5,5,6,6,7,7,8,8,8-pentadecafluoro-	YES			DTXSID30235262	DTXCID30157753	N-(3-Aminopropyl)-perfluorooctanamide	85938-56-3	Single Compound	NCCCNC(=O)C(F)(F)C(F)(F)C(F)(F)C(F)(F)C(F)(F)C(F)(F)C(F)(F)F
335	89685-61-0	Other substances		1-Propanesulfonic acid,3-[ethyl (2,2,3,3,4,4,5,5,6,6,7,7,8,8,8-pentadecafluoro-1-oxooctyl)amino]-,sodium salt (1:1)	YES			DTXSID30893301	DTXCID601323239	3-[Ethyl(perfluoro-1-oxooctyl)amino]-1-propanesulfonic acid sodium salt	89685-61-0	Single Compound	[Na+].CCN(CCCS([O-])(=O)=O)C(=O)C(F)(F)C(F)(F)C(F)(F)C(F)(F)C(F)(F)C(F)(F)C(F)(F)F
336	84029-60-7	Other substances		Nonene, heptadecafluoro-1-[(2,2,3,3,4,4,5,5,6,6,7,7,8,8,8-pentadecafluorooctyl)oxy]-	YES			DTXSID90880994		Heptadecafluoro-1-[(perfluoroheptyl)methyloxy]nonene	84029-60-7	Mixture/Formulation
337	138473-79-7	Other substances		Glycine, N-ethyl-N-(2,2,3,3,4,4,5,5,6,6,7,7,8,8,8-pentadecafluoro-1-oxooctyl)-, ammonium salt	YES			DTXSID801032698	DTXCID901517706	Ammonium N-ethyl-N-(perfluoro-1-oxooctyl)glycine	138473-79-7	Single Compound	[NH4+].CCN(CC([O-])=O)C(=O)C(F)(F)C(F)(F)C(F)(F)C(F)(F)C(F)(F)C(F)(F)C(F)(F)F
338	89932-71-8	Other substances		Octanamide, 2,2,3,3,4,4,5,5,6,6,7,7,8,8,8-pentadecafluoro-N-(14-hydroxy-3,6,9,12-tetraoxatetradec-1-yl)-	YES			DTXSID101034055	DTXCID901518766	N-(14-Hydroxy-3,6,9,12-tetraoxatetradec-1-yl)perfluorooctanamide	89932-71-8	Single Compound	OCCOCCOCCOCCOCCNC(=O)C(F)(F)C(F)(F)C(F)(F)C(F)(F)C(F)(F)C(F)(F)C(F)(F)F
339	178766-44-4	Other substances		Ethanaminium, N,N,N-trimethyl-2-[(2,2,3,3,4,4,5,5,6,6,7,7,7-pentadecafluoro-1-oxooctyl)amino]-, chloride (1:1)	YES			DTXSID901033025	DTXCID201518058	N,N,N-Trimethyl-2-[(perfluoro-1-oxooctyl)amino]ethanaminium chloride	178766-44-4	Single Compound	[Cl-].C[N+](C)(C)CCNC(=O)C(F)(F)C(F)(F)C(F)(F)C(F)(F)C(F)(F)C(F)(F)C(F)(F)F
340	376-23-8	Other substances		Octanamide, N-[3-(dimethylamino)propyl]-2,2,3,3,4,4,5,5,6,6,7,7,8,8,8-pentadecafluoro-	YES			DTXSID90892572	DTXCID401079765	N-Dimethyl ammonio propyl-perfluorooctane amide	376-23-8	Single Compound	CN(C)CCCNC(=O)C(F)(F)C(F)(F)C(F)(F)C(F)(F)C(F)(F)C(F)(F)C(F)(F)F
341	91707-61-8	Other substances		1-Pentanaminium, N,N,N-trimethyl-5-[(2,2,3,3,4,4,5,5,6,6,7,7,8,8,8-pentadecafluoro-1-oxooctyl)amino]-, iodide (1:1)	YES			DTXSID701034108	DTXCID101518805	N,N,N-Trimethyl-5-[(perfluoro-1-oxooctyl)amino]pentanaminium iodide	91707-61-8	Single Compound	[I-].C[N+](C)(C)CCCCCNC(=O)C(F)(F)C(F)(F)C(F)(F)C(F)(F)C(F)(F)C(F)(F)C(F)(F)F
342	30295-53-5	Other substances		Octanamide, N-[3-(dimethyloxidoamino)propyl]-2,2,3,3,4,4,5,5,6,6,7,7,8,8,8-pentadecafluoro-	YES			DTXSID30892571	DTXCID701079764	Perfluorooctaneamido amine oxide	30295-53-5	Single Compound	CN(C)(=O)CCCNC(=O)C(F)(F)C(F)(F)C(F)(F)C(F)(F)C(F)(F)C(F)(F)C(F)(F)F
343	308-01-0	Other substances		Pyridinium, 1-[2-[(2,2,3,3,4,4,5,5,6,6,7,7,8,8,8-pentadecafluoro-1-oxooctyl)amino]ethyl]-, chloride (1:1)	YES			DTXSID001032737	DTXCID701517750	1-[2-[(Perfluoro-1-oxooctyl)amino]ethyl]pyridinium chloride	308-01-0	Single Compound	[Cl-].FC(F)(F)C(F)(F)C(F)(F)C(F)(F)C(F)(F)C(F)(F)C(F)(F)C(=O)NCC[N+]1=CC=CC=C1
344	331755-02-3	Other substances		Pyridinium, 1-[2-[(2,2,3,3,4,4,5,5,6,6,7,7,8,8,8-pentadecafluoro-1-oxooctyl)amino]ethyl]-, bromide (1:1)	YES			DTXSID801032800	DTXCID001517816	1-[2-[(Perfluoro-1-oxooctyl)amino]ethyl]pyridinium bromide	331755-02-3	Single Compound	[Br-].FC(F)(F)C(F)(F)C(F)(F)C(F)(F)C(F)(F)C(F)(F)C(F)(F)C(=O)NCC[N+]1=CC=CC=C1
345	103555-98-2	Other substances		Piperazinium, 1-(2-hydroxyethyl)-1-methyl-4-(2,2,3,3,4,4,5,5,6,6,7,7,8,8,8-pentadecafluoro-1-oxooctyl)-, chloride (1:1)	YES			DTXSID801032450	DTXCID401517456	1-(2-Hydroxyethyl)-1-methyl-4-(perfluoro-1-oxooctyl)piperazinium chloride (1:1)	103555-98-2	Single Compound	C[N+]1(CCO)CCC(CC1)C(=O)C(F)(F)C(F)(F)C(F)(F)C(F)(F)C(F)(F)C(F)(F)C(F)(F)F
346	90179-39-8	Other substances		1-Propanaminium, N-(carboxymethyl)-N,N-dimethyl-3-[(2,2,3,3,4,4,5,5,6,6,7,7,8,8,8-pentadecafluoro-1-oxooctyl)amino]-, inner salt	YES			DTXSID70892590	DTXCID901079772	(Dimethyl{3-[(perfluorooctanoyl)amino]propyl}ammonio)acetate	90179-39-8	Single Compound	C[N+](C)(CCCNC(=O)C(F)(F)C(F)(F)C(F)(F)C(F)(F)C(F)(F)C(F)(F)C(F)(F)F)CC([O-])=O
347	5158-52-1	Other substances		1-Propanaminium, N-(2-carboxyethyl)-3-[(2,2,3,3,4,4,5,5,6,6,7,7,8,8,8-pentadecafluoro-1-oxooctyl)amino]-N,N-dimethyl-, inner salt	YES			DTXSID00880208	DTXCID001323431	(2-Carboxylatoethyl)dimethyl[3-(perfluorooctanamido)propyl]ammonium	5158-52-1	Single Compound	C[N+](C)(CCCNC(=O)C(F)(F)C(F)(F)C(F)(F)C(F)(F)C(F)(F)C(F)(F)C(F)(F)F)CCC([O-])=O
348	57670-46-9	Other substances		Ethanesulfonic acid, 2-[ethyl(2,2,3,3,4,4,5,5,6,6,7,7,8,8,8-pentadecafluoro-1-oxooctyl)amino]-, potassium salt (1:1)	YES			DTXSID801033058	DTXCID701518091	Potassium 2-[ethyl(perfluoro-1-oxooctyl)amino]ethanesulfonate	57670-46-9	Single Compound	[K+].CCN(CCS([O-])(=O)=O)C(=O)C(F)(F)C(F)(F)C(F)(F)C(F)(F)C(F)(F)C(F)(F)C(F)(F)F
349	98900-76-6	Other substances		1-Propanesulfonic acid, 3-[(3-aminopropyl) (2,2,3,3,4,4,5,5,6,6,7,7,8,8,8-pentadecafluoro-1-oxooctyl)amino]-2-hydroxy-, sodium salt (1:1)	YES			DTXSID201034341	DTXCID701518972	Sodium 3-[(3-aminopropyl)(perfluoro-1-oxooctyl)amino]-2-hydroxypropanesulfonate	98900-76-6	Single Compound	[Na+].NCCCN(CC(O)CS([O-])(=O)=O)C(=O)C(F)(F)C(F)(F)C(F)(F)C(F)(F)C(F)(F)C(F)(F)C(F)(F)F
350	98900-75-5	Other substances		Benzenesulfonic acid, 4-[[[3-(methylamino) propyl](2,2,3,3,4,4,5,5,6,6,7,7,8,8,8-pentadecafluoro-1-oxooctyl)amino]methyl]-, sodium salt (1:1)	YES			DTXSID501034340	DTXCID001518971	Sodium 4-[[[3-(methylamino)propyl](perfluoro-1-oxooctyl)amino]methyl]benzenesulfonate	98900-75-5	Single Compound	[Na+].CNCCCN(CC1=CC=C(C=C1)S([O-])(=O)=O)C(=O)C(F)(F)C(F)(F)C(F)(F)C(F)(F)C(F)(F)C(F)(F)C(F)(F)F
351	98046-76-5	Other substances		Octanamide, 2,2,3,3,4,4,5,5,6,6,7,7,8,8,8-pentadecafluoro-N-[3-(trimethoxysilyl)propyl]-	YES			DTXSID301034332	DTXCID801518963	N-[3-(Trimethoxysilyl)propyl]perfluorooctanamide	98046-76-5	Single Compound	CO[Si](CCCNC(=O)C(F)(F)C(F)(F)C(F)(F)C(F)(F)C(F)(F)C(F)(F)C(F)(F)F)(OC)OC
352	154380-30-0	Other substances		Poly(oxy-1,2-ethanediyl), α-[dimethoxy[3-[(2,2,3,3,4,4,5,5,6,6,7,7,8,8,8-pentadecafluoro-1-oxooctyl)amino]propyl]silyl]-ω-[[dimethoxy[3-[(2,2,3,3,4,4,5,5,6,6,7,7,8,8,8-pentadecafluoro-1-oxooctyl)amino]propyl]silyl]oxy]-	YES			DTXSID501042921	Markush	Poly(oxy-1,2-ethanediyl), alpha-[dimethoxy[3-[(perfluoro-1-oxooctyl)amino]propyl]silyl]-omega-[[dimethoxy[3-[(perfluoro-1-oxooctyl)amino]propyl]silyl]oxy]-	154380-30-0	Mixture/Formulation
353	647-42-7	Fluorotelomer alcohols	6:2 FTOH	6:2 Fluorotelomer alcohol	NO			DTXSID5044572	DTXCID3024572	2-(Perfluorohexyl)ethanol	647-42-7	Single Compound	OCCC(F)(F)C(F)(F)C(F)(F)C(F)(F)C(F)(F)C(F)(F)F
354	68412-68-0	Perfluoroalkyl phosphonic and phosphinic acids		Phosphonic acid, perfluoro-C6-12-alkyl derivs.	NO			DTXSID80882003	Markush	Phosphonic acid, perfluoro-C6-12-alkyl derivs.	68412-68-0	Mixture/Formulation
355	1765-48-6	Polyfluoroalkyl carboxylic acids		Undecanoic acid, 2,2,3,3,4,4,5,5,6,6,7,7,8,8,9,9,10,10,11,11-eicosafluoro-	NO			DTXSID5061954	DTXCID0035619	11-H-Perfluoroundecanoic acid	1765-48-6	Single Compound	OC(=O)C(F)(F)C(F)(F)C(F)(F)C(F)(F)C(F)(F)C(F)(F)C(F)(F)C(F)(F)C(F)(F)C(F)F
356	307-71-1	Polyfluoroalkyl carboxylic acids		Undecanoic acid, 2,2,3,3,4,4,5,5,6,6,7,7,8,8,9,9,10,10,11,11-eicosafluoro-, potassium salt	NO			DTXSID60880123	DTXCID501021719	Potassium 11H-perfluoroundecanoate	307-71-1	Single Compound	[K+].[O-]C(=O)C(F)(F)C(F)(F)C(F)(F)C(F)(F)C(F)(F)C(F)(F)C(F)(F)C(F)(F)C(F)(F)C(F)F
357	375-22-4	Perfluoroalkylcarboxylic acids other than PFOA, their isomers, and salts	PFBA	Perfluorobutanoic acid	NO			DTXSID4059916	DTXCID1039343	Perfluorobutanoic acid	375-22-4	Single Compound	OC(=O)C(F)(F)C(F)(F)C(F)(F)F
358	2706-90-3	Perfluoroalkylcarboxylic acids other than PFOA, their isomers, and salts	PFPeA	Perfluoropentanoic acid	NO			DTXSID6062599	DTXCID9037612	Perfluoropentanoic acid	2706-90-3	Single Compound	OC(=O)C(F)(F)C(F)(F)C(F)(F)C(F)(F)F
359	307-24-4	Perfluoroalkylcarboxylic acids other than PFOA, their isomers, and salts	PFHxA	Perfluorohexanoic acid	NO			DTXSID3031862	DTXCID1011862	Perfluorohexanoic acid	307-24-4	Single Compound	OC(=O)C(F)(F)C(F)(F)C(F)(F)C(F)(F)C(F)(F)F
360	375-85-9	Perfluoroalkylcarboxylic acids other than PFOA, their isomers, and salts	PFHpA	Perfluoroheptanoic acid	NO			DTXSID1037303	DTXCID9017303	Perfluoroheptanoic acid	375-85-9	Single Compound	OC(=O)C(F)(F)C(F)(F)C(F)(F)C(F)(F)C(F)(F)C(F)(F)F
361	375-95-1	Perfluoroalkylcarboxylic acids other than PFOA, their isomers, and salts	C9-PFCA or PFNA	Perfluorononan-1-oic acid	NO			DTXSID8031863	DTXCID6011863	Perfluorononanoic acid	375-95-1	Single Compound	OC(=O)C(F)(F)C(F)(F)C(F)(F)C(F)(F)C(F)(F)C(F)(F)C(F)(F)C(F)(F)F
362	335-76-2	Perfluoroalkylcarboxylic acids other than PFOA, their isomers, and salts	C10-PFCA or PFDA	Perfluorodecanoic acid	NO			DTXSID3031860	DTXCID1011860	Perfluorodecanoic acid	335-76-2	Single Compound	OC(=O)C(F)(F)C(F)(F)C(F)(F)C(F)(F)C(F)(F)C(F)(F)C(F)(F)C(F)(F)C(F)(F)F
363	2058-94-8	Perfluoroalkylcarboxylic acids other than PFOA, their isomers, and salts	C11-PFCA or PFUnA	Perfluoroundecanoic acid	NO			DTXSID8047553	DTXCID6027553	Perfluoroundecanoic acid	2058-94-8	Single Compound	OC(=O)C(F)(F)C(F)(F)C(F)(F)C(F)(F)C(F)(F)C(F)(F)C(F)(F)C(F)(F)C(F)(F)C(F)(F)F
364	307-55-1	Perfluoroalkylcarboxylic acids other than PFOA, their isomers, and salts	C12-PFCA or PFDoA	Perfluorododecanoic acid	NO			DTXSID8031861	DTXCID6011861	Perfluorododecanoic acid	307-55-1	Single Compound	OC(=O)C(F)(F)C(F)(F)C(F)(F)C(F)(F)C(F)(F)C(F)(F)C(F)(F)C(F)(F)C(F)(F)C(F)(F)C(F)(F)F
365	72629-94-8	Perfluoroalkylcarboxylic acids other than PFOA, their isomers, and salts	C13-PFCA or PFTrA	Perfluorotridecanoic acid	NO			DTXSID90868151	DTXCID60816285	Perfluorotridecanoic acid	72629-94-8	Single Compound	OC(=O)C(F)(F)C(F)(F)C(F)(F)C(F)(F)C(F)(F)C(F)(F)C(F)(F)C(F)(F)C(F)(F)C(F)(F)C(F)(F)C(F)(F)F
366	376-06-7	Perfluoroalkylcarboxylic acids other than PFOA, their isomers, and salts	C14-PFCA or PFTeA	Perfluorotetradecanoic acid	NO			DTXSID3059921	DTXCID4039362	Perfluorotetradecanoic acid	376-06-7	Single Compound	OC(=O)C(F)(F)C(F)(F)C(F)(F)C(F)(F)C(F)(F)C(F)(F)C(F)(F)C(F)(F)C(F)(F)C(F)(F)C(F)(F)C(F)(F)C(F)(F)F
367	141074-63-7	Perfluoroalkylcarboxylic acids other than PFOA, their isomers, and salts	C15-PFCA	Perfluoropentadecanoic acid	NO			DTXSID30893341	DTXCID201323306	Perfluoropentadecanoic acid	141074-63-7	Single Compound	OC(=O)C(F)(F)C(F)(F)C(F)(F)C(F)(F)C(F)(F)C(F)(F)C(F)(F)C(F)(F)C(F)(F)C(F)(F)C(F)(F)C(F)(F)C(F)(F)C(F)(F)F
368	67905-19-5	Perfluoroalkylcarboxylic acids other than PFOA, their isomers, and salts	C16-PFCA	Perfluorohexadecanoic acid	NO			DTXSID1070800	DTXCID8045228	Perfluorohexadecanoic acid	67905-19-5	Single Compound	OC(=O)C(F)(F)C(F)(F)C(F)(F)C(F)(F)C(F)(F)C(F)(F)C(F)(F)C(F)(F)C(F)(F)C(F)(F)C(F)(F)C(F)(F)C(F)(F)C(F)(F)C(F)(F)F
369	57475-95-3	Perfluoroalkylcarboxylic acids other than PFOA, their isomers, and salts	C17-PFCA	Perfluoroheptadecanoic acid	NO			DTXSID60896623	DTXCID301326115	Perfluoroheptadecanoic acid	57475-95-3	Single Compound	OC(=O)C(F)(F)C(F)(F)C(F)(F)C(F)(F)C(F)(F)C(F)(F)C(F)(F)C(F)(F)C(F)(F)C(F)(F)C(F)(F)C(F)(F)C(F)(F)C(F)(F)C(F)(F)C(F)(F)F
370	16517-11-6	Perfluoroalkylcarboxylic acids other than PFOA, their isomers, and salts	C18-PFCA	Perfluorooctadecanoic acid	NO			DTXSID1066071	DTXCID2035302	Perfluorooctadecanoic acid	16517-11-6	Single Compound	OC(=O)C(F)(F)C(F)(F)C(F)(F)C(F)(F)C(F)(F)C(F)(F)C(F)(F)C(F)(F)C(F)(F)C(F)(F)C(F)(F)C(F)(F)C(F)(F)C(F)(F)C(F)(F)C(F)(F)C(F)(F)F
371	133921-38-7	Perfluoroalkylcarboxylic acids other than PFOA, their isomers, and salts	C19-PFCA	Perfluorononadecanoic acid	NO			DTXSID00896622	DTXCID601326114	Perfluorononadecanoic acid	133921-38-7	Single Compound	OC(=O)C(F)(F)C(F)(F)C(F)(F)C(F)(F)C(F)(F)C(F)(F)C(F)(F)C(F)(F)C(F)(F)C(F)(F)C(F)(F)C(F)(F)C(F)(F)C(F)(F)C(F)(F)C(F)(F)C(F)(F)C(F)(F)F
372	68310-12-3	Perfluoroalkylcarboxylic acids other than PFOA, their isomers, and salts	C20-PFCA	Perfluoroeicosanoic acid	NO			DTXSID90887327	DTXCID901026628	Perfluoroeicosanoic acid	68310-12-3	Single Compound	OC(=O)C(F)(F)C(F)(F)C(F)(F)C(F)(F)C(F)(F)C(F)(F)C(F)(F)C(F)(F)C(F)(F)C(F)(F)C(F)(F)C(F)(F)C(F)(F)C(F)(F)C(F)(F)C(F)(F)C(F)(F)C(F)(F)C(F)(F)F
373	15811-52-6	Perfluoroalkylcarboxylic acids other than PFOA, their isomers, and salts		Dodecanoyl fluoride, 2,2,3,3,4,4,5,5,6,6,7,7,8,8,9,9,10,10,11,12,12,12-docosafluoro-11-(trifluoromethyl)-	NO			DTXSID4065949	DTXCID5035084	Perfluoro-11-methyldodecanoyl fluoride	15811-52-6	Single Compound	FC(=O)C(F)(F)C(F)(F)C(F)(F)C(F)(F)C(F)(F)C(F)(F)C(F)(F)C(F)(F)C(F)(F)C(F)(C(F)(F)F)C(F)(F)F
374	16486-96-7	Perfluoroalkylcarboxylic acids other than PFOA, their isomers, and salts		Dodecanoic acid, 2,2,3,3,4,4,5,5,6,6,7,7,8,8,9,9,10,10,11,12,12,12-docosafluoro-11-(trifluoromethyl)-	NO			DTXSID2066064	DTXCID0035295	Perfluoro-11-(trifluoromethyl)dodecanoic acid	16486-96-7	Single Compound	OC(=O)C(F)(F)C(F)(F)C(F)(F)C(F)(F)C(F)(F)C(F)(F)C(F)(F)C(F)(F)C(F)(F)C(F)(C(F)(F)F)C(F)(F)F
375	18024-09-4	Perfluoroalkylcarboxylic acids other than PFOA, their isomers, and salts		Tetradecanoic acid, 2,2,3,3,4,4,5,5,6,6,7,7,8,8,9,9,10,10,11,11,12,12,13,14,14,14-hexacosafluoro-13-(trifluoromethyl)-	NO			DTXSID7066300	DTXCID2035722	Hexacosafluoro-13-(trifluoromethyl)myristic acid	18024-09-4	Single Compound	OC(=O)C(F)(F)C(F)(F)C(F)(F)C(F)(F)C(F)(F)C(F)(F)C(F)(F)C(F)(F)C(F)(F)C(F)(F)C(F)(F)C(F)(C(F)(F)F)C(F)(F)F
376	68015-87-2	Perfluoroalkylcarboxylic acids other than PFOA, their isomers, and salts		Dodecanoic acid, 2,2,3,3,4,4,5,5,6,6,7,7,8,8,9,9,10,10,11,12,12,12-docosafluoro-11-(trifluoromethyl)-, compd. With ethanamine (1:1)	NO			DTXSID6070986	DTXCID5045417	Perfluoro-11-methyldodecanoic acid compd. with ethanamine	68015-87-2	Single Compound	CC[NH3+].[O-]C(=O)C(F)(F)C(F)(F)C(F)(F)C(F)(F)C(F)(F)C(F)(F)C(F)(F)C(F)(F)C(F)(F)C(F)(C(F)(F)F)C(F)(F)F
377	68025-62-7	Perfluoroalkylcarboxylic acids other than PFOA, their isomers, and salts		Tetradecanoyl fluoride, 2,2,3,3,4,4,5,5,6,6,7,7,8,8,9,9,10,10,11,11,12,12,13,14,14,14-hexacosafluoro-13-(trifluoromethyl)-	NO			DTXSID4071005	DTXCID8045436	Perfluoro-13-(methyl)tetradecanoyl fluoride	68025-62-7	Single Compound	FC(=O)C(F)(F)C(F)(F)C(F)(F)C(F)(F)C(F)(F)C(F)(F)C(F)(F)C(F)(F)C(F)(F)C(F)(F)C(F)(F)C(F)(C(F)(F)F)C(F)(F)F
378	3108-42-7	Perfluoroalkylcarboxylic acids other than PFOA, their isomers, and salts		Ammonium nonadecafluorodecanoate	NO			DTXSID60880027	DTXCID401021635	Ammonium perfluorodecanoate	3108-42-7	Single Compound	[NH4+].[O-]C(=O)C(F)(F)C(F)(F)C(F)(F)C(F)(F)C(F)(F)C(F)(F)C(F)(F)C(F)(F)C(F)(F)F
379	3658-63-7	Perfluoroalkylcarboxylic acids other than PFOA, their isomers, and salts		Decanoic acid, 2,2,3,3,4,4,5,5,6,6,7,7,8,8,9,10,10,10-octadecafluoro-9-(trifluoromethyl)-, ammonium salt (1:1)	NO			DTXSID50880197	DTXCID601326590	Ammonium perfluoro-9-(methyl)decanoate	3658-63-7	Single Compound	[H][NH+]([H])[H].[O-]C(=O)C(F)(F)C(F)(F)C(F)(F)C(F)(F)C(F)(F)C(F)(F)C(F)(F)C(F)(C(F)(F)F)C(F)(F)F
380	3793-74-6	Perfluoroalkylcarboxylic acids other than PFOA, their isomers, and salts		Ammonium tricosafluorododecanoate	NO			DTXSID40191360	DTXCID50113851	Ammonium perfluorododecanoate	3793-74-6	Single Compound	[NH4+].[O-]C(=O)C(F)(F)C(F)(F)C(F)(F)C(F)(F)C(F)(F)C(F)(F)C(F)(F)C(F)(F)C(F)(F)C(F)(F)C(F)(F)F
381	375-73-5	Perfluoroalkanesulfonic acids	PFBS	Perfluorobutane sulfonic acid	NO			DTXSID5030030	DTXCID3010030	Perfluorobutanesulfonic acid	375-73-5	Single Compound	OS(=O)(=O)C(F)(F)C(F)(F)C(F)(F)C(F)(F)F
382	2706-91-4	Perfluoroalkanesulfonic acids	PFPeS	Perfluoropentane sulfonic acid	NO			DTXSID8062600	DTXCID4037613	Perfluoropentanesulfonic acid	2706-91-4	Single Compound	OS(=O)(=O)C(F)(F)C(F)(F)C(F)(F)C(F)(F)C(F)(F)F
383	355-46-4	Perfluoroalkanesulfonic acids	PFHxS	Perfluorohexane sulfonic acid	NO			DTXSID7040150	DTXCID2011859	Perfluorohexanesulfonic acid	355-46-4	Single Compound	OS(=O)(=O)C(F)(F)C(F)(F)C(F)(F)C(F)(F)C(F)(F)C(F)(F)F
384	375-92-8	Perfluoroalkanesulfonic acids	PFHpS	Perfluoroheptane sulfonic acid	NO			DTXSID8059920	DTXCID1039347	Perfluoroheptanesulfonic acid	375-92-8	Single Compound	OS(=O)(=O)C(F)(F)C(F)(F)C(F)(F)C(F)(F)C(F)(F)C(F)(F)C(F)(F)F
385	1763-23-1	Perfluoroalkanesulfonic acids	PFOS	Perfluorooctane sulfonic acid	NO			DTXSID3031864	DTXCID1011864	Perfluorooctanesulfonic acid	1763-23-1	Single Compound	OS(=O)(=O)C(F)(F)C(F)(F)C(F)(F)C(F)(F)C(F)(F)C(F)(F)C(F)(F)C(F)(F)F
386	958445-44-8	Per- and polyfluoroalkyl ether carboxylic acids	ADONA	Propanoic acid, 2,​2,​3,​3-​tetrafluoro-​3-​[1,​1,​2,​2,​3,​3-​hexafluoro-​3-​ (trifluoromethoxy)​propoxy]​-​, ammonium salt (1:1)	NO			DTXSID00874026	DTXCID001079632	Ammonium 4,8-dioxa-3H-perfluorononanoate	958445-44-8	Mixture of Stereoisomers	[NH4+].[O-]C(=O)C(F)(F)C(F)OC(F)(F)C(F)(F)C(F)(F)OC(F)(F)F
387	908020-52-0	Per- and polyfluoroalkyl ether carboxylic acids	EEA-NH4	Ammonium salt of perfluoro[(2-ethyloxy-ethoxy)acetic acid	NO			DTXSID50893409	DTXCID301323416	Ammonium perfluoro-3,6-dioxaoctanoate	908020-52-0	Single Compound	[NH4+].[O-]C(=O)C(F)(F)OC(F)(F)C(F)(F)OC(F)(F)C(F)(F)F
388	80153-82-8	Per- and polyfluoroalkyl ether carboxylic acids	EEA	Perfluoro[(2-ethyloxy-ethoxy)acetic acid	NO			DTXSID20880982	DTXCID701022313	Perfluoro-3,6-dioxaoctanoic acid	80153-82-8	Single Compound	OC(=O)C(F)(F)OC(F)(F)C(F)(F)OC(F)(F)C(F)(F)F
389	9002-84-0	Fluoropolymers	PTFE	Polytetrafluoroethylene	NO			DTXSID7047724	Markush	Polytetrafluoroethylene	9002-84-0	Polymer
390	25067-11-2	Fluoropolymers	FEP	Fluorinated Ethylene Propylene Copolymer	NO			DTXSID70880371		Hexafluoropropene tetrafluoroethylene polymer	25067-11-2	Polymer
391	26655-00-5	Fluoropolymers	PFA1	Perfluoro Alkoxy Polymer 1	NO			DTXSID40880383		Perfluoro-3-[(trifluoroethenyl)oxy]propane, polymer with tetrafluoroethene	26655-00-5	Polymer
392	31784-04-0	Fluoropolymers	PFA2	Perfluoro Alkoxy Polymer 2	NO			DTXSID10881948		Tetrafluoroethene polymer with trifluoro(pentaflurorethoxy)ethene	31784-04-0	Mixture/Formulation
393	26425-79-6	Fluoropolymers	MFA	Perfluoro Methyl Alkoxy Polymer	NO			DTXSID80880382		1,1,2,2-Tetrafluoroethene polymer with 1,2,2-trifluoro-2-(trifluoromethoxy)ethene	26425-79-6	Polymer
394	4151-50-2	Other substances	N-EtFOSA	N-Ethyl-1,1,2,2,3,3,4,4,5,5,6,6,7,7,8,8,8-heptadecafluoro-1-octanesulfonamide, N-Ethylperfluorooctane-1-sulfonamide	NO			DTXSID1032646	DTXCID9012646	N-Ethylperfluorooctanesulfonamide	4151-50-2	Single Compound	CCNS(=O)(=O)C(F)(F)C(F)(F)C(F)(F)C(F)(F)C(F)(F)C(F)(F)C(F)(F)C(F)(F)F
395

## Sheet: S2.PFASSTRUCT+
DTXSID	Substance_Name	Substance_CASRN	SMILES	PFASSTRUCT_v4	OECD_2018	2021 PFOA Indicative List SORT	2021 PFOA Indicative List Status
DTXSID8031865	Perfluorooctanoic acid	335-67-1	OC(=O)C(F)(F)C(F)(F)C(F)(F)C(F)(F)C(F)(F)C(F)(F)C(F)(F)F	1	1	1	YES
DTXSID40892486	Perfluorooctanoate	45285-51-6	[O-]C(=O)C(F)(F)C(F)(F)C(F)(F)C(F)(F)C(F)(F)C(F)(F)C(F)(F)F	1	1	2	YES
DTXSID50896591	Perfluoro-3,4-dimethylhexanoic acid	1882109-81-0	OC(=O)C(F)(F)C(F)(C(F)(F)F)C(F)(C(F)(F)F)C(F)(F)C(F)(F)F	1	1	4	YES
DTXSID90896590	Perfluoro-2,5-dimethylhexanoic acid	1882109-80-9	OC(=O)C(F)(C(F)(F)F)C(F)(F)C(F)(F)C(F)(C(F)(F)F)C(F)(F)F	1	1	5	YES
DTXSID80896589	Perfluoro-4-ethylhexanoic acid	1882109-79-6	OC(=O)C(F)(F)C(F)(F)C(F)(C(F)(F)C(F)(F)F)C(F)(F)C(F)(F)F	1	1	6	YES
DTXSID20896588	Perfluoro-3-ethylhexanoic acid	1882109-78-5	OC(=O)C(F)(F)C(F)(C(F)(F)C(F)(F)F)C(F)(F)C(F)(F)C(F)(F)F	1	1	7	YES
DTXSID60896587	Perfluoro-2-propylpentanoic acid	1882109-77-4	OC(=O)C(F)(C(F)(F)C(F)(F)C(F)(F)F)C(F)(F)C(F)(F)C(F)(F)F	1	1	8	YES
DTXSID00896586	Perfluoro-2-(propan-2-yl)pentanoic acid	1882109-76-3	OC(=O)C(F)(C(F)(F)C(F)(F)C(F)(F)F)C(F)(C(F)(F)F)C(F)(F)F	1	1	9	YES
DTXSID40896585	Perfluoro-3,4,4-trimethylpentanoic acid	1882109-75-2	OC(=O)C(F)(F)C(F)(C(F)(F)F)C(C(F)(F)F)(C(F)(F)F)C(F)(F)F	1	1	10	YES
DTXSID80896584	Perfluoro-3,3,4-trimethylpentanoic acid	1882109-74-1	OC(=O)C(F)(F)C(C(F)(F)F)(C(F)(F)F)C(F)(C(F)(F)F)C(F)(F)F	1	1	11	YES
DTXSID20896583	Perfluoro-2,4,4-trimethylpentanoic acid	1882109-73-0	OC(=O)C(F)(C(F)(F)F)C(F)(F)C(C(F)(F)F)(C(F)(F)F)C(F)(F)F	1	1	12	YES
DTXSID60896582	Perfluoro-2,3,4-trimethylpentanoic acid	1882109-72-9	OC(=O)C(F)(C(F)(F)F)C(F)(C(F)(F)F)C(F)(C(F)(F)F)C(F)(F)F	1	1	13	YES
DTXSID00896581	Perfluoro-2,3,3-trimethylpentanoic acid	1882109-71-8	OC(=O)C(F)(C(F)(F)F)C(C(F)(F)F)(C(F)(F)F)C(F)(F)C(F)(F)F	1	1	14	YES
DTXSID40896580	Perfluoro-2,2,4-trimethylpentanoic acid	1882109-70-7	OC(=O)C(C(F)(F)F)(C(F)(F)F)C(F)(F)C(F)(C(F)(F)F)C(F)(F)F	1	1	15	YES
DTXSID70896578	Perfluoro-3-(2-propyl)pentanoic acid	1882109-68-3	OC(=O)C(F)(F)C(F)(C(F)(F)C(F)(F)F)C(F)(C(F)(F)F)C(F)(F)F	1	1	16	YES
DTXSID10896577	Perfluoro-3-ethyl-3-methylpentanoic acid	1882109-67-2	OC(=O)C(F)(F)C(C(F)(F)F)(C(F)(F)C(F)(F)F)C(F)(F)C(F)(F)F	1	1	17	YES
DTXSID50896576	Perfluoro-3-ethyl-2-methylpentanoic acid	1882109-66-1	OC(=O)C(F)(C(F)(F)F)C(F)(C(F)(F)C(F)(F)F)C(F)(F)C(F)(F)F	1	1	18	YES
DTXSID90896575	Perfluoro-2-ethyl-4-methylpentanoic acid	1882109-65-0	OC(=O)C(F)(C(F)(F)C(F)(F)F)C(F)(F)C(F)(C(F)(F)F)C(F)(F)F	1	1	19	YES
DTXSID30896574	Perfluoro-2-ethyl-3-methylpentanoic acid	1882109-64-9	OC(=O)C(F)(C(F)(F)C(F)(F)F)C(F)(C(F)(F)F)C(F)(F)C(F)(F)F	1	1	20	YES
DTXSID70896573	Perfluoro-2-ethyl-2-methylpentanoic acid	1882109-63-8	OC(=O)C(C(F)(F)F)(C(F)(F)C(F)(F)F)C(F)(F)C(F)(F)C(F)(F)F	1	1	21	YES
DTXSID30896579	Perfluoro-2,2,3-trimethylpentanoic acid	1882109-69-4	OC(=O)C(C(F)(F)F)(C(F)(F)F)C(F)(C(F)(F)F)C(F)(F)C(F)(F)F	1	1	22	YES
DTXSID10896572	Perfluoro-2,2,3,3-tetramethylbutanoic acid	1882109-62-7	OC(=O)C(C(F)(F)F)(C(F)(F)F)C(C(F)(F)F)(C(F)(F)F)C(F)(F)F	1	1	23	YES
DTXSID50896571	Perfluoro-3-methyl-2-(2-propyl)butanoic acid	1882109-61-6	OC(=O)C(F)(C(F)(C(F)(F)F)C(F)(F)F)C(F)(C(F)(F)F)C(F)(F)F	1	1	24	YES
DTXSID90896570	Perfluoro-2-ethyl-3,3-dimethylbutanoic acid	1882109-60-5	OC(=O)C(F)(C(F)(F)C(F)(F)F)C(C(F)(F)F)(C(F)(F)F)C(F)(F)F	1	1	25	YES
DTXSID80896569	Perfluoro-2-ethyl-2,3-dimethylbutanoic acid	1882109-59-2	OC(=O)C(C(F)(F)F)(C(F)(F)C(F)(F)F)C(F)(C(F)(F)F)C(F)(F)F	1	1	26	YES
DTXSID20896568	Perfluoro-2,2-diethylbutanoic acid	1882109-58-1	OC(=O)C(C(F)(F)C(F)(F)F)(C(F)(F)C(F)(F)F)C(F)(F)C(F)(F)F	1	1	27	YES
DTXSID60896567	Perfluoro-3,3-dimethylhexanoic acid	1812247-20-3	OC(=O)C(F)(F)C(C(F)(F)F)(C(F)(F)F)C(F)(F)C(F)(F)C(F)(F)F	1	1	28	YES
DTXSID20896604	Perfluoro-2,4-dimethylhexanoic acid	1812247-19-0	OC(=O)C(F)(C(F)(F)F)C(F)(F)C(F)(C(F)(F)F)C(F)(F)C(F)(F)F	1	1	29	YES
DTXSID60896603	Perfluoro-2,3-dimethylhexanoic acid	1812247-18-9	OC(=O)C(F)(C(F)(F)F)C(F)(C(F)(F)F)C(F)(F)C(F)(F)C(F)(F)F	1	1	30	YES
DTXSID00896602	Perfluoro-2,2-dimethylhexanoic acid	1812247-17-8	OC(=O)C(C(F)(F)F)(C(F)(F)F)C(F)(F)C(F)(F)C(F)(F)C(F)(F)F	1	1	31	YES
DTXSID40896601	Perfluoro-4,4-dimethylhexanoic acid	1192593-79-5	OC(=O)C(F)(F)C(F)(F)C(C(F)(F)F)(C(F)(F)F)C(F)(F)C(F)(F)F	1	1	32	YES
DTXSID80896600	Perfluoro-4,5-dimethylhexanoic acid	1144512-36-6	OC(=O)C(F)(F)C(F)(F)C(F)(C(F)(F)F)C(F)(C(F)(F)F)C(F)(F)F	1	1	33	YES
DTXSID30896599	Perfluoro-3,5-dimethylhexanoic acid	1144512-35-5	OC(=O)C(F)(F)C(F)(C(F)(F)F)C(F)(F)C(F)(C(F)(F)F)C(F)(F)F	1	1	34	YES
DTXSID70896598	Perfluoro-5,5-dimethylhexanoic acid	1144512-34-4	OC(=O)C(F)(F)C(F)(F)C(F)(F)C(C(F)(F)F)(C(F)(F)F)C(F)(F)F	1	1	35	YES
DTXSID10896597	Perfluoro-4-methylheptanoic acid	1144512-18-4	OC(=O)C(F)(F)C(F)(F)C(F)(C(F)(F)F)C(F)(F)C(F)(F)C(F)(F)F	1	1	36	YES
DTXSID50896596	Perfluoro-5-methylheptanoic acid	909009-42-3	OC(=O)C(F)(F)C(F)(F)C(F)(F)C(F)(C(F)(F)F)C(F)(F)C(F)(F)F	1	1	37	YES
DTXSID90896595	Perfluoro-3-methylheptanoic acid	705240-04-6	OC(=O)C(F)(F)C(F)(C(F)(F)F)C(F)(F)C(F)(F)C(F)(F)C(F)(F)F	1	1	38	YES
DTXSID70896593	Perfluoro-2-methylheptanoic acid	207678-51-1	OC(=O)C(F)(C(F)(F)F)C(F)(F)C(F)(F)C(F)(F)C(F)(F)C(F)(F)F	1	1	39	YES
DTXSID10896592	Perfluoro-2-ethylhexanoic acid	35605-76-6	OC(=O)C(F)(C(F)(F)C(F)(F)F)C(F)(F)C(F)(F)C(F)(F)C(F)(F)F	1	1	41	YES
DTXSID50562865	Perfluoro-6-(trifluoromethyl)heptanoic acid	15166-06-0	OC(=O)C(F)(F)C(F)(F)C(F)(F)C(F)(F)C(F)(C(F)(F)F)C(F)(F)F	1	1	42	YES
DTXSID8037708	Ammonium perfluorooctanoate	3825-26-1	[NH4+].[O-]C(=O)C(F)(F)C(F)(F)C(F)(F)C(F)(F)C(F)(F)C(F)(F)C(F)(F)F	1	1	44	YES
DTXSID40880025	Sodium perfluorooctanoate	335-95-5	[Na+].[O-]C(=O)C(F)(F)C(F)(F)C(F)(F)C(F)(F)C(F)(F)C(F)(F)C(F)(F)F	1	1	45	YES
DTXSID00880026	Potassium perfluorooctanoate	2395-00-8	[K+].[O-]C(=O)C(F)(F)C(F)(F)C(F)(F)C(F)(F)C(F)(F)C(F)(F)C(F)(F)F	1	1	46	YES
DTXSID201021922	Lithium perfluorooctanoate	17125-58-5	[Li+].[O-]C(=O)C(F)(F)C(F)(F)C(F)(F)C(F)(F)C(F)(F)C(F)(F)C(F)(F)F	1		47	YES
DTXSID00880127	Silver perfluorooctanoate	335-93-3	[Ag+].[O-]C(=O)C(F)(F)C(F)(F)C(F)(F)C(F)(F)C(F)(F)C(F)(F)C(F)(F)F	1	1	48	YES
DTXSID00880581	Chromium(3+) perfluorooctanoate	68141-02-6	[Cr+3].[O-]C(=O)C(F)(F)C(F)(F)C(F)(F)C(F)(F)C(F)(F)C(F)(F)C(F)(F)F.[O-]C(=O)C(F)(F)C(F)(F)C(F)(F)C(F)(F)C(F)(F)C(F)(F)C(F)(F)F.[O-]C(=O)C(F)(F)C(F)(F)C(F)(F)C(F)(F)C(F)(F)C(F)(F)C(F)(F)F	1	1	49	YES
DTXSID30895567	N,N,N-Triethylethanaminium perfluorooctanoate	98241-25-9	CC[N+](CC)(CC)CC.[O-]C(=O)C(F)(F)C(F)(F)C(F)(F)C(F)(F)C(F)(F)C(F)(F)C(F)(F)F	1	1	50	YES
DTXSID20896649	Ammonium perfluoro-2-ethylhexanoate	13058-06-5	[NH4+].[O-]C(=O)C(F)(C(F)(F)C(F)(F)F)C(F)(F)C(F)(F)C(F)(F)C(F)(F)F	1	1	51	YES
DTXSID10896653	Sodium perfluoro-2-ethylhexanoate	1195164-59-0	[Na+].[O-]C(=O)C(F)(C(F)(F)C(F)(F)F)C(F)(F)C(F)(F)C(F)(F)C(F)(F)F	1	1	52	YES
DTXSID90896651	Ammonium perfluoro-6-methylheptanoate	19742-57-5	[NH4+].[O-]C(=O)C(F)(F)C(F)(F)C(F)(F)C(F)(F)C(F)(C(F)(F)F)C(F)(F)F	1	1	53	YES
DTXSID50896652	Potassium perfluoro-6-methylheptanoate	29457-73-6	[K+].[O-]C(=O)C(F)(F)C(F)(F)C(F)(F)C(F)(F)C(F)(C(F)(F)F)C(F)(F)F	1	1	55	YES
DTXSID30896650	Sodium perfluoro-6-methylheptanoate	18017-22-6	[Na+].[O-]C(=O)C(F)(F)C(F)(F)C(F)(F)C(F)(F)C(F)(C(F)(F)F)C(F)(F)F	1	1	56	YES
DTXSID10897549	Aluminum perfluoro-6-methylheptanoate	15715-47-6	[Al+3].[O-]C(=O)C(F)(F)C(F)(F)C(F)(F)C(F)(F)C(F)(C(F)(F)F)C(F)(F)F.[O-]C(=O)C(F)(F)C(F)(F)C(F)(F)C(F)(F)C(F)(C(F)(F)F)C(F)(F)F.[O-]C(=O)C(F)(F)C(F)(F)C(F)(F)C(F)(F)C(F)(C(F)(F)F)C(F)(F)F	1	1	58	YES
DTXSID8059924	Methyl perfluorooctanoate	376-27-2	COC(=O)C(F)(F)C(F)(F)C(F)(F)C(F)(F)C(F)(F)C(F)(F)C(F)(F)F	1	1	63	YES
DTXSID5062849	Ethyl perfluorooctanoate	3108-24-5	CCOC(=O)C(F)(F)C(F)(F)C(F)(F)C(F)(F)C(F)(F)C(F)(F)C(F)(F)F	1	1	64	YES
DTXSID80880387	Perfluorooctanoic anhydride	33496-48-9	FC(F)(F)C(F)(F)C(F)(F)C(F)(F)C(F)(F)C(F)(F)C(F)(F)C(=O)OC(=O)C(F)(F)C(F)(F)C(F)(F)C(F)(F)C(F)(F)C(F)(F)C(F)(F)F	1	1	65	YES
DTXSID80543001	Bis(heptadecafluorooctyl)phosphinic acid	40143-79-1	OP(=O)(C(F)(F)C(F)(F)C(F)(F)C(F)(F)C(F)(F)C(F)(F)C(F)(F)C(F)(F)F)C(F)(F)C(F)(F)C(F)(F)C(F)(F)C(F)(F)C(F)(F)C(F)(F)C(F)(F)F	1	1	68	YES
DTXSID30896594	Perfluorohexylperfluorooctyl phosphinic acid	610800-34-5	OP(=O)(C(F)(F)C(F)(F)C(F)(F)C(F)(F)C(F)(F)C(F)(F)F)C(F)(F)C(F)(F)C(F)(F)C(F)(F)C(F)(F)C(F)(F)C(F)(F)C(F)(F)F	1	1	69	YES
DTXSID0059829	Perfluorooctanoyl fluoride	335-66-0	FC(=O)C(F)(F)C(F)(F)C(F)(F)C(F)(F)C(F)(F)C(F)(F)C(F)(F)F	1	1	70	YES
DTXSID0060147	Perfluorooctyl iodide	507-63-1	FC(F)(F)C(F)(F)C(F)(F)C(F)(F)C(F)(F)C(F)(F)C(F)(F)C(F)(F)I	1	1	71	YES
DTXSID00880122	1-Iodoperfluoroundecane	307-50-6	FC(F)(F)C(F)(F)C(F)(F)C(F)(F)C(F)(F)C(F)(F)C(F)(F)C(F)(F)C(F)(F)C(F)(F)C(F)(F)I	1	1	72	YES
DTXSID0059796	Pentacosafluoro-1-iodododecane	307-60-8	FC(F)(F)C(F)(F)C(F)(F)C(F)(F)C(F)(F)C(F)(F)C(F)(F)C(F)(F)C(F)(F)C(F)(F)C(F)(F)C(F)(F)I	1	1	73	YES
DTXSID5059797	Nonacosafluoro-1-iodotetradecane	307-63-1	FC(F)(F)C(F)(F)C(F)(F)C(F)(F)C(F)(F)C(F)(F)C(F)(F)C(F)(F)C(F)(F)C(F)(F)C(F)(F)C(F)(F)C(F)(F)C(F)(F)I	1	1	74	YES
DTXSID40880126	Perfluoropentadecyl iodide	335-79-5	FC(F)(F)C(F)(F)C(F)(F)C(F)(F)C(F)(F)C(F)(F)C(F)(F)C(F)(F)C(F)(F)C(F)(F)C(F)(F)C(F)(F)C(F)(F)C(F)(F)C(F)(F)I	1	1	75	YES
DTXSID10880138	Perfluorotridecyl iodide	376-04-5	FC(F)(F)C(F)(F)C(F)(F)C(F)(F)C(F)(F)C(F)(F)C(F)(F)C(F)(F)C(F)(F)C(F)(F)C(F)(F)C(F)(F)C(F)(F)I	1	1	76	YES
DTXSID8059974	Perfluorodecyl iodide	423-62-1	FC(F)(F)C(F)(F)C(F)(F)C(F)(F)C(F)(F)C(F)(F)C(F)(F)C(F)(F)C(F)(F)C(F)(F)I	1	1	77	YES
DTXSID2060331	Nonadecafluoro-9-Iodononane	558-97-4	FC(F)(F)C(F)(F)C(F)(F)C(F)(F)C(F)(F)C(F)(F)C(F)(F)C(F)(F)C(F)(F)I	1	1	78	YES
DTXSID5060984	Icosafluoro-10-iodo-2-(trifluoromethyl)decane	677-93-0	FC(F)(F)C(F)(C(F)(F)F)C(F)(F)C(F)(F)C(F)(F)C(F)(F)C(F)(F)C(F)(F)C(F)(F)C(F)(F)I	1	1	79	YES
DTXSID4062933	Tetracosafluoro-1-iodo-11-(trifluoromethyl)dodecane	3248-61-1	FC(F)(F)C(F)(C(F)(F)F)C(F)(F)C(F)(F)C(F)(F)C(F)(F)C(F)(F)C(F)(F)C(F)(F)C(F)(F)C(F)(F)C(F)(F)I	1	1	80	YES
DTXSID9062934	Octacosafluoro-14-iodo-2-(trifluoromethyl)tetradecane	3248-63-3	FC(F)(F)C(F)(C(F)(F)F)C(F)(F)C(F)(F)C(F)(F)C(F)(F)C(F)(F)C(F)(F)C(F)(F)C(F)(F)C(F)(F)C(F)(F)C(F)(F)C(F)(F)I	1	1	81	YES
DTXSID6062123	1-(Perfluorooctyl)-2-iodoethane	2043-53-0	FC(F)(F)C(F)(F)C(F)(F)C(F)(F)C(F)(F)C(F)(F)C(F)(F)C(F)(F)CCI	1	1	83	YES
DTXSID1062124	10:2 Fluorotelomer iodide	2043-54-1	FC(F)(F)C(F)(F)C(F)(F)C(F)(F)C(F)(F)C(F)(F)C(F)(F)C(F)(F)C(F)(F)C(F)(F)CCI	1	1	84	YES
DTXSID2067535	1-Iodo-1H,1H,2H,2H-perfluorotetradecane	30046-31-2	FC(F)(F)C(F)(F)C(F)(F)C(F)(F)C(F)(F)C(F)(F)C(F)(F)C(F)(F)C(F)(F)C(F)(F)C(F)(F)C(F)(F)CCI	1	1	85	YES
DTXSID4070322	2-(Perfluorotetradecyl)-1-iodoethane	65510-55-6	FC(F)(F)C(F)(F)C(F)(F)C(F)(F)C(F)(F)C(F)(F)C(F)(F)C(F)(F)C(F)(F)C(F)(F)C(F)(F)C(F)(F)C(F)(F)C(F)(F)CCI	1	1	86	YES
DTXSID9070323	1-(Perfluorononyl)-2-iodoethane	65510-56-7	FC(F)(F)C(F)(F)C(F)(F)C(F)(F)C(F)(F)C(F)(F)C(F)(F)C(F)(F)C(F)(F)CCI	1	1	87	YES
DTXSID7074616	1H,1H,2H-Perfluoro-1-decene	21652-58-4	FC(F)(F)C(F)(F)C(F)(F)C(F)(F)C(F)(F)C(F)(F)C(F)(F)C(F)(F)C=C	1	1	90	YES
DTXSID60184471	(Perfluorodecyl)ethylene	30389-25-4	FC(F)(F)C(F)(F)C(F)(F)C(F)(F)C(F)(F)C(F)(F)C(F)(F)C(F)(F)C(F)(F)C(F)(F)C=C	1	1	91	YES
DTXSID4069422	2-(Perfluorotetradecyl)ethan-1-ol	60699-51-6	OCCC(F)(F)C(F)(F)C(F)(F)C(F)(F)C(F)(F)C(F)(F)C(F)(F)C(F)(F)C(F)(F)C(F)(F)C(F)(F)C(F)(F)C(F)(F)C(F)(F)F	1	1	92	YES
DTXSID20895531	2-(Perfluorotridecanyl)ethanol	176676-70-3	OCCC(F)(F)C(F)(F)C(F)(F)C(F)(F)C(F)(F)C(F)(F)C(F)(F)C(F)(F)C(F)(F)C(F)(F)C(F)(F)C(F)(F)C(F)(F)F	1	1	93	YES
DTXSID3068170	2-(Perfluorododecyl)ethanol	39239-77-5	OCCC(F)(F)C(F)(F)C(F)(F)C(F)(F)C(F)(F)C(F)(F)C(F)(F)C(F)(F)C(F)(F)C(F)(F)C(F)(F)C(F)(F)F	1	1	94	YES
DTXSID10551730	2-(Perfluoroundecanyl)ethanol	1545-59-1	OCCC(F)(F)C(F)(F)C(F)(F)C(F)(F)C(F)(F)C(F)(F)C(F)(F)C(F)(F)C(F)(F)C(F)(F)C(F)(F)F	1	1	95	YES
DTXSID2029905	10:2 Fluorotelomer alcohol	865-86-1	OCCC(F)(F)C(F)(F)C(F)(F)C(F)(F)C(F)(F)C(F)(F)C(F)(F)C(F)(F)C(F)(F)C(F)(F)F	1	1	96	YES
DTXSID00551729	9:2 Fluorotelomer alcohol	87017-97-8	OCCC(F)(F)C(F)(F)C(F)(F)C(F)(F)C(F)(F)C(F)(F)C(F)(F)C(F)(F)C(F)(F)F	1	1	97	YES
DTXSID7029904	Fluorotelomer alcohol 8:2	678-39-7	OCCC(F)(F)C(F)(F)C(F)(F)C(F)(F)C(F)(F)C(F)(F)C(F)(F)C(F)(F)F	1	1	98	YES
DTXSID70895723	2H-Perfluoro-2-dodecenoate	70887-94-4	OC(=O)C=C(F)C(F)(F)C(F)(F)C(F)(F)C(F)(F)C(F)(F)C(F)(F)C(F)(F)C(F)(F)C(F)(F)F	1	1	99	YES
DTXSID40892325	2-(Perfluorodecyl)ethanoic acid	53826-13-4	OC(=O)CC(F)(F)C(F)(F)C(F)(F)C(F)(F)C(F)(F)C(F)(F)C(F)(F)C(F)(F)C(F)(F)C(F)(F)F	1	1	100	YES
DTXSID601033088	9:2 Fluorotelomer carboxylic acid	191852-87-6	OC(=O)CC(F)(F)C(F)(F)C(F)(F)C(F)(F)C(F)(F)C(F)(F)C(F)(F)C(F)(F)C(F)(F)F	1		101	YES
DTXSID60825615	2H-Perfluoro-2-decenoic acid	70887-84-2	OC(=O)C=C(F)C(F)(F)C(F)(F)C(F)(F)C(F)(F)C(F)(F)C(F)(F)C(F)(F)F	1	1	102	YES
DTXSID50451109	2-(Perfluorooctyl)ethanoic acid	27854-31-5	OC(=O)CC(F)(F)C(F)(F)C(F)(F)C(F)(F)C(F)(F)C(F)(F)C(F)(F)C(F)(F)F	1	1	103	YES
DTXSID20880462	(Perfluoro-7-methyloctyl)-2-hydroxypropyl dihydrogen phosphate	54009-73-3	OC(COP(O)(O)=O)CC(F)(F)C(F)(F)C(F)(F)C(F)(F)C(F)(F)C(F)(F)C(F)(C(F)(F)F)C(F)(F)F	1	1	104	YES
DTXSID20880528	3-(Perfluoro-9-methyldecyl)-2-hydroxypropyl dihydrogen phosphate	63295-27-2	OC(COP(O)(O)=O)CC(F)(F)C(F)(F)C(F)(F)C(F)(F)C(F)(F)C(F)(F)C(F)(F)C(F)(F)C(F)(C(F)(F)F)C(F)(F)F	1	1	105	YES
DTXSID80880529	3-(Perfluoro(11-methyldodecyl))-2-hydroxypropyl dihydrogen phosphate	63295-28-3	OC(COP(O)(O)=O)CC(F)(F)C(F)(F)C(F)(F)C(F)(F)C(F)(F)C(F)(F)C(F)(F)C(F)(F)C(F)(F)C(F)(F)C(F)(C(F)(F)F)C(F)(F)F	1	1	106	YES
DTXSID50880531	3-(Perfluoro(13-methyltetradecyl))-2-hydroxypropyl dihydrogen phosphate	63295-29-4	OC(COP(O)(O)=O)CC(F)(F)C(F)(F)C(F)(F)C(F)(F)C(F)(F)C(F)(F)C(F)(F)C(F)(F)C(F)(F)C(F)(F)C(F)(F)C(F)(F)C(F)(C(F)(F)F)C(F)(F)F	1	1	107	YES
DTXSID60880527	Diammonium 3-(perfluoro-7-methyloctyl)-2-hydroxypropyl phosphate	63295-18-1	[NH4+].[NH4+].OC(COP([O-])([O-])=O)CC(F)(F)C(F)(F)C(F)(F)C(F)(F)C(F)(F)C(F)(F)C(F)(C(F)(F)F)C(F)(F)F	1	1	108	YES
DTXSID201044061	(Perfluoro-7-methyloctyl)-2-hydroxypropyl dihydrogen phosphate, compd. with 2,2′-iminobis[ethanol] (1:2)	63295-19-2	OCCNCCO.OCCNCCO.OC(COP(O)(O)=O)CC(F)(F)C(F)(F)C(F)(F)C(F)(F)C(F)(F)C(F)(F)C(F)(C(F)(F)F)C(F)(F)F			109	YES
DTXSID201033355	Diammonium 2-(perfluoro-7-methyloctyl)1-methylethanol phosphate	63295-23-8	[NH4+].[NH4+].CC(CC(F)(F)C(F)(F)C(F)(F)C(F)(F)C(F)(F)C(F)(F)C(F)(C(F)(F)F)C(F)(F)F)OP([O-])([O-])=O	1		110	YES
DTXSID301033358	Diammonium 2‐{[3-(perfluoro‐7‐methyloctyl)-1‐(phosphonatooxy)propan‐2‐yl]oxy}acetic acid	63295-24-9	[NH4+].[NH4+].OC(=O)COC(COP([O-])([O-])=O)CC(F)(F)C(F)(F)C(F)(F)C(F)(F)C(F)(F)C(F)(F)C(F)(C(F)(F)F)C(F)(F)F	1		111	YES
DTXSID801033353	2-Chloro-3-(perfluoro-7-methyl-1-octyl)propanol dihydrogen phosphate	63295-22-7	OP(O)(=O)OCC(Cl)CC(F)(F)C(F)(F)C(F)(F)C(F)(F)C(F)(F)C(F)(F)C(F)(C(F)(F)F)C(F)(F)F	1		112	YES
DTXSID90881143	3-(Perfluorodecyl)-2-hydroxypropyl dihydrogen phosphate	94158-70-0	OC(COP(O)(O)=O)CC(F)(F)C(F)(F)C(F)(F)C(F)(F)C(F)(F)C(F)(F)C(F)(F)C(F)(F)C(F)(F)C(F)(F)F	1	1	113	YES
DTXSID40881173	Diammonium 3-(perfluorodecyl)-2-hydroxypropyl dihydrogen phosphate	94200-46-1	[NH4+].[NH4+].OC(COP([O-])([O-])=O)CC(F)(F)C(F)(F)C(F)(F)C(F)(F)C(F)(F)C(F)(F)C(F)(F)C(F)(F)C(F)(F)C(F)(F)F	1	1	114	YES
DTXSID00881174	Diammonium 3-(perfluorododecyl)-2-hydroxypropyl dihydrogen phosphate	94200-47-2	[NH4+].[NH4+].OC(COP([O-])([O-])=O)CC(F)(F)C(F)(F)C(F)(F)C(F)(F)C(F)(F)C(F)(F)C(F)(F)C(F)(F)C(F)(F)C(F)(F)C(F)(F)C(F)(F)F	1	1	115	YES
DTXSID60881175	Diammonium 3-(perfluorotetradecyl)-2-hydroxypropyl dihydrogen phosphate	94200-48-3	[NH4+].[NH4+].OC(COP([O-])([O-])=O)CC(F)(F)C(F)(F)C(F)(F)C(F)(F)C(F)(F)C(F)(F)C(F)(F)C(F)(F)C(F)(F)C(F)(F)C(F)(F)C(F)(F)C(F)(F)C(F)(F)F	1	1	116	YES
DTXSID80881177	Diammonium 3-(perfluoro-9-methyldecyl)-2-hydroxypropyl dihydrogen phosphate	94200-50-7	[NH4+].[NH4+].OC(COP([O-])([O-])=O)CC(F)(F)C(F)(F)C(F)(F)C(F)(F)C(F)(F)C(F)(F)C(F)(F)C(F)(F)C(F)(C(F)(F)F)C(F)(F)F	1	1	117	YES
DTXSID30881182	Diammonium 3-(perfluoro-11-methyldodecyl)-2-hydroxypropyl dihydrogen phosphate	94200-51-8	[NH4+].[NH4+].OC(COP([O-])([O-])=O)CC(F)(F)C(F)(F)C(F)(F)C(F)(F)C(F)(F)C(F)(F)C(F)(F)C(F)(F)C(F)(F)C(F)(F)C(F)(C(F)(F)F)C(F)(F)F	1	1	118	YES
DTXSID90881183	Diammonium 3-(perfluoro-13-methyltetradecyl)-2-hydroxypropyl dihydrogen phosphate	94200-52-9	[NH4+].[NH4+].OC(COP([O-])([O-])=O)CC(F)(F)C(F)(F)C(F)(F)C(F)(F)C(F)(F)C(F)(F)C(F)(F)C(F)(F)C(F)(F)C(F)(F)C(F)(F)C(F)(F)C(F)(C(F)(F)F)C(F)(F)F	1	1	119	YES
DTXSID60874027	2-(Perfluorooctyl)ethyl dihydrogen phosphate	57678-03-2	OP(O)(=O)OCCC(F)(F)C(F)(F)C(F)(F)C(F)(F)C(F)(F)C(F)(F)C(F)(F)C(F)(F)F	1	1	120	YES
DTXSID90218051	Bis(2-(perfluorooctyl)ethyl) hydrogen phosphate	678-41-1	OP(=O)(OCCC(F)(F)C(F)(F)C(F)(F)C(F)(F)C(F)(F)C(F)(F)C(F)(F)C(F)(F)F)OCCC(F)(F)C(F)(F)C(F)(F)C(F)(F)C(F)(F)C(F)(F)C(F)(F)C(F)(F)F	1	1	121	YES
DTXSID90881067	8:2 Fluorotelomer diammonium phosphate	93857-44-4	[NH4+].[NH4+].[O-]P([O-])(=O)OCCC(F)(F)C(F)(F)C(F)(F)C(F)(F)C(F)(F)C(F)(F)C(F)(F)C(F)(F)F	1	1	122	YES
DTXSID10881069	10:2 Fluorotelomer diammonium dihydrogen phosphate	93857-45-5	[NH4+].[NH4+].[O-]P([O-])(=O)OCCC(F)(F)C(F)(F)C(F)(F)C(F)(F)C(F)(F)C(F)(F)C(F)(F)C(F)(F)C(F)(F)C(F)(F)F	1	1	123	YES
DTXSID20206380	10:2 Fluorotelomer dihydrogen phosphate	57678-05-4	OP(O)(=O)OCCC(F)(F)C(F)(F)C(F)(F)C(F)(F)C(F)(F)C(F)(F)C(F)(F)C(F)(F)C(F)(F)C(F)(F)F	1	1	124	YES
DTXSID30172360	10:2 Fluorotelomer phosphate diester	1895-26-7	OP(=O)(OCCC(F)(F)C(F)(F)C(F)(F)C(F)(F)C(F)(F)C(F)(F)C(F)(F)C(F)(F)C(F)(F)C(F)(F)F)OCCC(F)(F)C(F)(F)C(F)(F)C(F)(F)C(F)(F)C(F)(F)C(F)(F)C(F)(F)C(F)(F)C(F)(F)F	1	1	125	YES
DTXSID101044068	Diphosphoric acid, mono(perfluorooctyl)ethyl ester, compd. with 2,2′,2′′-nitrilotris[ethanol] (1:3)	98005-85-7	OCCN(CCO)CCO.OCCN(CCO)CCO.OCCN(CCO)CCO.OP(O)(=O)OP(O)(=O)OCCC(F)(F)C(F)(F)C(F)(F)C(F)(F)C(F)(F)C(F)(F)C(F)(F)C(F)(F)F			127	YES
DTXSID401044067	Diphosphoric acid, mono(perfluorooctyl)ethyl ester, compd. with 2-aminoethanol (1:3)	98005-84-6	NCCO.NCCO.NCCO.OP(O)(=O)OP(O)(=O)OCCC(F)(F)C(F)(F)C(F)(F)C(F)(F)C(F)(F)C(F)(F)C(F)(F)C(F)(F)F			128	YES
DTXSID60873414	(Perfluorodecyl)ethyl (perfluorooctyl)ethyl hydrogen phosphate	1158182-60-5	OP(=O)(OCCC(F)(F)C(F)(F)C(F)(F)C(F)(F)C(F)(F)C(F)(F)C(F)(F)C(F)(F)F)OCCC(F)(F)C(F)(F)C(F)(F)C(F)(F)C(F)(F)C(F)(F)C(F)(F)C(F)(F)C(F)(F)C(F)(F)F	1		129	YES
DTXSID201032919	(Perfluorooctyl)ethyl (perfluorododecyl)ethyl hydrogen phosphate	1578186-42-1	OP(=O)(OCCC(F)(F)C(F)(F)C(F)(F)C(F)(F)C(F)(F)C(F)(F)C(F)(F)C(F)(F)F)OCCC(F)(F)C(F)(F)C(F)(F)C(F)(F)C(F)(F)C(F)(F)C(F)(F)C(F)(F)C(F)(F)C(F)(F)C(F)(F)C(F)(F)F	1		130	YES
DTXSID501026545	10:2/12:2 Fluorotelomer phosphate diester	1158182-61-6	OP(=O)(OCCC(F)(F)C(F)(F)C(F)(F)C(F)(F)C(F)(F)C(F)(F)C(F)(F)C(F)(F)C(F)(F)C(F)(F)F)OCCC(F)(F)C(F)(F)C(F)(F)C(F)(F)C(F)(F)C(F)(F)C(F)(F)C(F)(F)C(F)(F)C(F)(F)C(F)(F)C(F)(F)F	1		131	YES
DTXSID80239593	Bis[2-(perfluorooctyl)ethyl] phosphate ammonium salt	93776-20-6	[NH4+].[O-]P(=O)(OCCC(F)(F)C(F)(F)C(F)(F)C(F)(F)C(F)(F)C(F)(F)C(F)(F)C(F)(F)F)OCCC(F)(F)C(F)(F)C(F)(F)C(F)(F)C(F)(F)C(F)(F)C(F)(F)C(F)(F)F	1	1	132	YES
DTXSID40239594	Ammonium bis((perfluorodecyl)ethyl) phosphate	93776-21-7	[NH4+].[O-]P(=O)(OCCC(F)(F)C(F)(F)C(F)(F)C(F)(F)C(F)(F)C(F)(F)C(F)(F)C(F)(F)C(F)(F)C(F)(F)F)OCCC(F)(F)C(F)(F)C(F)(F)C(F)(F)C(F)(F)C(F)(F)C(F)(F)C(F)(F)C(F)(F)C(F)(F)F	1	1	133	YES
DTXSID70881368	Bis[(perfluoro-7-methyloctyl)-2-hydroxypropyl] hydrogen phosphate	63295-20-5	OC(COP(O)(=O)OCC(O)CC(F)(F)C(F)(F)C(F)(F)C(F)(F)C(F)(F)C(F)(F)C(F)(C(F)(F)F)C(F)(F)F)CC(F)(F)C(F)(F)C(F)(F)C(F)(F)C(F)(F)C(F)(F)C(F)(C(F)(F)F)C(F)(F)F	1	1	134	YES
DTXSID101033364	Bis[3-(perfluoro-7-methyloctyl]-2-chloropropanyl) hydrogen phosphate	63295-26-1	OP(=O)(OCC(Cl)CC(F)(F)C(F)(F)C(F)(F)C(F)(F)C(F)(F)C(F)(F)C(F)(C(F)(F)F)C(F)(F)F)OCC(Cl)CC(F)(F)C(F)(F)C(F)(F)C(F)(F)C(F)(F)C(F)(F)C(F)(C(F)(F)F)C(F)(F)F	1		135	YES
DTXSID401032646	Bis[(perfluorooctyl)undecyl] hydrogen phosphate	2343-53-5	OP(=O)(OCCCCCCCCCCCC(F)(F)C(F)(F)C(F)(F)C(F)(F)C(F)(F)C(F)(F)C(F)(F)C(F)(F)F)OCCCCCCCCCCCC(F)(F)C(F)(F)C(F)(F)C(F)(F)C(F)(F)C(F)(F)C(F)(F)C(F)(F)F	1		136	YES
DTXSID401335066	(Perfluorooctyl)ethyl bis((perfluorohexyl)ethyl) phosphate	1578186-53-4	FC(F)(F)C(F)(F)C(F)(F)C(F)(F)C(F)(F)C(F)(F)CCOP(=O)(OCCC(F)(F)C(F)(F)C(F)(F)C(F)(F)C(F)(F)C(F)(F)F)OCCC(F)(F)C(F)(F)C(F)(F)C(F)(F)C(F)(F)C(F)(F)C(F)(F)C(F)(F)F			137	YES
DTXSID801335070	Bis((perfluorooctyl)ethyl) (perfluorohexyl)ethyl phosphate	1578186-56-7	FC(F)(F)C(F)(F)C(F)(F)C(F)(F)C(F)(F)C(F)(F)CCOP(=O)(OCCC(F)(F)C(F)(F)C(F)(F)C(F)(F)C(F)(F)C(F)(F)C(F)(F)C(F)(F)F)OCCC(F)(F)C(F)(F)C(F)(F)C(F)(F)C(F)(F)C(F)(F)C(F)(F)C(F)(F)F			138	YES
DTXSID201335072	(Perfluorodecyl)ethyl (perfluorooctyl)ethyl (perfluorohexyl)ethyl phosphate	1578186-64-7	FC(F)(F)C(F)(F)C(F)(F)C(F)(F)C(F)(F)C(F)(F)CCOP(=O)(OCCC(F)(F)C(F)(F)C(F)(F)C(F)(F)C(F)(F)C(F)(F)C(F)(F)C(F)(F)F)OCCC(F)(F)C(F)(F)C(F)(F)C(F)(F)C(F)(F)C(F)(F)C(F)(F)C(F)(F)C(F)(F)C(F)(F)F			139	YES
DTXSID901335073	(Perfluorodecyl)ethyl bis((perfluorohexyl)ethyl) phosphate	1578186-57-8	FC(F)(F)C(F)(F)C(F)(F)C(F)(F)C(F)(F)C(F)(F)CCOP(=O)(OCCC(F)(F)C(F)(F)C(F)(F)C(F)(F)C(F)(F)C(F)(F)F)OCCC(F)(F)C(F)(F)C(F)(F)C(F)(F)C(F)(F)C(F)(F)C(F)(F)C(F)(F)C(F)(F)C(F)(F)F			140	YES
DTXSID30599058	Tris[2-(perfluorooctyl)ethyl] phosphate	149790-22-7	FC(F)(F)C(F)(F)C(F)(F)C(F)(F)C(F)(F)C(F)(F)C(F)(F)C(F)(F)CCOP(=O)(OCCC(F)(F)C(F)(F)C(F)(F)C(F)(F)C(F)(F)C(F)(F)C(F)(F)C(F)(F)F)OCCC(F)(F)C(F)(F)C(F)(F)C(F)(F)C(F)(F)C(F)(F)C(F)(F)C(F)(F)F	1	1	141	YES
DTXSID101032930	Disodium N‐[3‐(phosphonatooxy)propyl]‐N‐propyl-(perfluorooctyl)ethylsulfonamide	441765-20-4	[Na+].[Na+].CCCN(CCCOP([O-])([O-])=O)S(=O)(=O)CCC(F)(F)C(F)(F)C(F)(F)C(F)(F)C(F)(F)C(F)(F)C(F)(F)C(F)(F)F	1		142	YES
DTXSID60880224	3-(Perfluoro-13-methyl-tetradecyl)-2-hydroxypropyl acrylate	16083-78-6	OC(COC(=O)C=C)CC(F)(F)C(F)(F)C(F)(F)C(F)(F)C(F)(F)C(F)(F)C(F)(F)C(F)(F)C(F)(F)C(F)(F)C(F)(F)C(F)(F)C(F)(C(F)(F)F)C(F)(F)F	1	1	143	YES
DTXSID4063660	(Perfluorotetradecyl)ethyl 2-methyl-2-propenoate	4980-53-4	CC(=C)C(=O)OCCC(F)(F)C(F)(F)C(F)(F)C(F)(F)C(F)(F)C(F)(F)C(F)(F)C(F)(F)C(F)(F)C(F)(F)C(F)(F)C(F)(F)C(F)(F)C(F)(F)F	1	1	144	YES
DTXSID1064083	(Perfluorododecyl)ethyl methacrylate	6014-75-1	CC(=C)C(=O)OCCC(F)(F)C(F)(F)C(F)(F)C(F)(F)C(F)(F)C(F)(F)C(F)(F)C(F)(F)C(F)(F)C(F)(F)C(F)(F)C(F)(F)F	1	1	145	YES
DTXSID20880225	3-(Perfluoro-11-methyldodecyl)-2-hydroxypropyl propenoate	16083-87-7	OC(COC(=O)C=C)CC(F)(F)C(F)(F)C(F)(F)C(F)(F)C(F)(F)C(F)(F)C(F)(F)C(F)(F)C(F)(F)C(F)(F)C(F)(C(F)(F)F)C(F)(F)F	1	1	146	YES
DTXSID10880456	2-(Perfluoro-11-methyldodecyl)ethyl propenoate	52956-82-8	FC(F)(F)C(F)(C(F)(F)F)C(F)(F)C(F)(F)C(F)(F)C(F)(F)C(F)(F)C(F)(F)C(F)(F)C(F)(F)C(F)(F)C(F)(F)CCOC(=O)C=C	1	1	147	YES
DTXSID80880968	(Perfluoro-9-methyldecyl)ethyl methacrylate	74256-14-7	CC(=C)C(=O)OCCC(F)(F)C(F)(F)C(F)(F)C(F)(F)C(F)(F)C(F)(F)C(F)(F)C(F)(F)C(F)(C(F)(F)F)C(F)(F)F	1	1	148	YES
DTXSID40880969	(Perfluoro-11-methyldodecyl)ethyl methacrylate	74256-15-8	CC(=C)C(=O)OCCC(F)(F)C(F)(F)C(F)(F)C(F)(F)C(F)(F)C(F)(F)C(F)(F)C(F)(F)C(F)(F)C(F)(F)C(F)(C(F)(F)F)C(F)(F)F	1	1	149	YES
DTXSID9037743	2-(Perfluorodecyl)ethyl acrylate	17741-60-5	FC(F)(F)C(F)(F)C(F)(F)C(F)(F)C(F)(F)C(F)(F)C(F)(F)C(F)(F)C(F)(F)C(F)(F)CCOC(=O)C=C	1	1	150	YES
DTXSID6062204	10:2 Fluorotelomer methacrylate	2144-54-9	CC(=C)C(=O)OCCC(F)(F)C(F)(F)C(F)(F)C(F)(F)C(F)(F)C(F)(F)C(F)(F)C(F)(F)C(F)(F)C(F)(F)F	1	1	151	YES
DTXSID5067348	2-(Perfluorooctyl)ethyl acrylate	27905-45-9	FC(F)(F)C(F)(F)C(F)(F)C(F)(F)C(F)(F)C(F)(F)C(F)(F)C(F)(F)CCOC(=O)C=C	1	1	152	YES
DTXSID8062101	2-(Perfluorooctyl)ethyl methacrylate	1996-88-9	CC(=C)C(=O)OCCC(F)(F)C(F)(F)C(F)(F)C(F)(F)C(F)(F)C(F)(F)C(F)(F)C(F)(F)F	1	1	153	YES
DTXSID80238647	((Perfluoro-13-methyltetradecyl)ethyl) acrylate	91615-22-4	FC(F)(F)C(F)(C(F)(F)F)C(F)(F)C(F)(F)C(F)(F)C(F)(F)C(F)(F)C(F)(F)C(F)(F)C(F)(F)C(F)(F)C(F)(F)C(F)(F)C(F)(F)CCOC(=O)C=C	1	1	155	YES
DTXSID10240839	(Perfluoro-15-methylhexadecyl)ethyl acrylate	94158-63-1	FC(F)(F)C(F)(C(F)(F)F)C(F)(F)C(F)(F)C(F)(F)C(F)(F)C(F)(F)C(F)(F)C(F)(F)C(F)(F)C(F)(F)C(F)(F)C(F)(F)C(F)(F)C(F)(F)C(F)(F)CCOC(=O)C=C	1	1	156	YES
DTXSID20240840	((Perfluoro-13-methyltetradecyl)ethyl) methacrylate	94158-64-2	CC(=C)C(=O)OCCC(F)(F)C(F)(F)C(F)(F)C(F)(F)C(F)(F)C(F)(F)C(F)(F)C(F)(F)C(F)(F)C(F)(F)C(F)(F)C(F)(F)C(F)(C(F)(F)F)C(F)(F)F	1	1	157	YES
DTXSID80240841	(Perfluoro-15-methylhexadecyl)ethyl methacrylate	94158-65-3	CC(=C)C(=O)OCCC(F)(F)C(F)(F)C(F)(F)C(F)(F)C(F)(F)C(F)(F)C(F)(F)C(F)(F)C(F)(F)C(F)(F)C(F)(F)C(F)(F)C(F)(F)C(F)(F)C(F)(C(F)(F)F)C(F)(F)F	1	1	158	YES
DTXSID501032768	2-(Perfluorooctyl)-1-(hydroxymethyl)ethyl 2-propenoate	146955-29-5	OCC(CC(F)(F)C(F)(F)C(F)(F)C(F)(F)C(F)(F)C(F)(F)C(F)(F)C(F)(F)F)OC(=O)C=C	1		159	YES
DTXSID50379975	3-(Perfluorooctyl)-2-hydroxypropyl acrylate	76962-34-0	OC(COC(=O)C=C)CC(F)(F)C(F)(F)C(F)(F)C(F)(F)C(F)(F)C(F)(F)C(F)(F)C(F)(F)F	1	1	160	YES
DTXSID80881016	(2-Carboxylatoethyl)dimethyl(((perfluorododecyl)-2-hydroxypropyl)amino)propylammonium	93776-12-6	[H]N(CCC[N+]([H])(CC)CCC([O-])=O)CC(O)CC(F)(F)C(F)(F)C(F)(F)C(F)(F)C(F)(F)C(F)(F)C(F)(F)C(F)(F)C(F)(F)C(F)(F)C(F)(F)C(F)(F)F	1	1	161	YES
DTXSID10881029	(2-Carboxylatoethyl)-3-((perfluorodecyl)-2-hydroxypropyl)aminopropyldimethylammonium	93776-13-7	[H]N(CCC[N+](C)(C)CCC([O-])=O)CC(O)CC(F)(F)C(F)(F)C(F)(F)C(F)(F)C(F)(F)C(F)(F)C(F)(F)C(F)(F)C(F)(F)C(F)(F)F	1	1	162	YES
DTXSID80881031	(2-Carboxylatoethyl)-3-((perfluoro-11-methyldodecyl)-2-hydroxypropyl)aminopropyldimethylammonium	93776-15-9	C[N+](C)(CCCNCC(O)CC(F)(F)C(F)(F)C(F)(F)C(F)(F)C(F)(F)C(F)(F)C(F)(F)C(F)(F)C(F)(F)C(F)(F)C(F)(C(F)(F)F)C(F)(F)F)CCC([O-])=O	1	1	163	YES
DTXSID20881156	1-((3-(Dimethylamino)propyl)amino)-(3-(perfluoro-9-methyldecyl))propanol	94159-83-8	CN(C)CCCNC(O)CCC(F)(F)C(F)(F)C(F)(F)C(F)(F)C(F)(F)C(F)(F)C(F)(F)C(F)(F)C(F)(C(F)(F)F)C(F)(F)F	1	1	164	YES
DTXSID60881150	1-((3-(Dimethylamino)propyl)amino)-(3-(perfluorododecyl))propan-2-ol	94159-79-2	CN(C)CCCNCC(O)CC(F)(F)C(F)(F)C(F)(F)C(F)(F)C(F)(F)C(F)(F)C(F)(F)C(F)(F)C(F)(F)C(F)(F)C(F)(F)C(F)(F)F	1	1	165	YES
DTXSID20881151	1-((3-(Dimethylamino)propyl)amino)-(3-(perfluorodecyl))propan-2-ol	94159-80-5	CN(C)CCCNCC(O)CC(F)(F)C(F)(F)C(F)(F)C(F)(F)C(F)(F)C(F)(F)C(F)(F)C(F)(F)C(F)(F)C(F)(F)F	1	1	166	YES
DTXSID00881154	1-((3-(Dimethylamino)propyl)amino)-(3-(perfluoro-11-methyldodecyl))propan-2-ol	94159-82-7	CN(C)CCCNCC(O)CC(F)(F)C(F)(F)C(F)(F)C(F)(F)C(F)(F)C(F)(F)C(F)(F)C(F)(F)C(F)(F)C(F)(F)C(F)(C(F)(F)F)C(F)(F)F	1	1	167	YES
DTXSID601029611	8:2 Fluorotelomer stearate monoester	99955-83-6	CCCCCCCCCCCCCCCCCC(=O)OCCC(F)(F)C(F)(F)C(F)(F)C(F)(F)C(F)(F)C(F)(F)C(F)(F)C(F)(F)F	1		168	YES
DTXSID301029612	8:2 Fluorotelomer citrate triester	302911-86-0	OC(CC(=O)OCCC(F)(F)C(F)(F)C(F)(F)C(F)(F)C(F)(F)C(F)(F)C(F)(F)C(F)(F)F)(CC(=O)OCCC(F)(F)C(F)(F)C(F)(F)C(F)(F)C(F)(F)C(F)(F)C(F)(F)C(F)(F)F)CC(=O)OCCC(F)(F)C(F)(F)C(F)(F)C(F)(F)C(F)(F)C(F)(F)C(F)(F)C(F)(F)F	1		169	YES
DTXSID00184995	[(Perfluorooctyl)ethyl]methyl dichlorosilane	3102-79-2	C[Si](Cl)(Cl)CCC(F)(F)C(F)(F)C(F)(F)C(F)(F)C(F)(F)C(F)(F)C(F)(F)C(F)(F)F	1	1	170	YES
DTXSID10225601	2-(Perfluorooctyl)ethyldimethylchlorosilane	74612-30-9	C[Si](C)(Cl)CCC(F)(F)C(F)(F)C(F)(F)C(F)(F)C(F)(F)C(F)(F)C(F)(F)C(F)(F)F	1	1	171	YES
DTXSID40144396	1H,1H,2H,2H-Perfluorodecyltriethoxysilane	101947-16-4	CCO[Si](CCC(F)(F)C(F)(F)C(F)(F)C(F)(F)C(F)(F)C(F)(F)C(F)(F)C(F)(F)F)(OCC)OCC	1	1	172	YES
DTXSID60382354	Triethoxy[2-(perfluorodecyl)ethyl]silane	146090-84-8	CCO[Si](CCC(F)(F)C(F)(F)C(F)(F)C(F)(F)C(F)(F)C(F)(F)C(F)(F)C(F)(F)C(F)(F)C(F)(F)F)(OCC)OCC	1	1	173	YES
DTXSID2074376	1H,1H,2H,2H-Perfluorodecyltrichlorosilane	78560-44-8	FC(F)(F)C(F)(F)C(F)(F)C(F)(F)C(F)(F)C(F)(F)C(F)(F)C(F)(F)CC[Si](Cl)(Cl)Cl	1	1	174	YES
DTXSID7072884	1H,1H,2H,2H-Perfluorodecyltrimethoxysilane	83048-65-1	CO[Si](CCC(F)(F)C(F)(F)C(F)(F)C(F)(F)C(F)(F)C(F)(F)C(F)(F)C(F)(F)F)(OC)OC	1	1	175	YES
DTXSID40895553	2-(Perfluorodecyl)ethyl(trimethoxy)silane	123445-18-1	CO[Si](CCC(F)(F)C(F)(F)C(F)(F)C(F)(F)C(F)(F)C(F)(F)C(F)(F)C(F)(F)C(F)(F)C(F)(F)F)(OC)OC	1	1	176	YES
DTXSID80631134	1H,1H,2H,2H-Perfluorodecyl(tri-iso-propoxy)silane	246234-80-0	CC(C)O[Si](CCC(F)(F)C(F)(F)C(F)(F)C(F)(F)C(F)(F)C(F)(F)C(F)(F)C(F)(F)F)(OC(C)C)OC(C)C	1	1	177	YES
DTXSID501032487	Tetrakis[2-[(perfluorodecyl)thio]ethyl]silane	1189587-64-1	FC(F)(F)C(F)(F)C(F)(F)C(F)(F)C(F)(F)C(F)(F)C(F)(F)C(F)(F)C(F)(F)C(F)(F)SCC[Si](CCSC(F)(F)C(F)(F)C(F)(F)C(F)(F)C(F)(F)C(F)(F)C(F)(F)C(F)(F)C(F)(F)C(F)(F)F)(CCSC(F)(F)C(F)(F)C(F)(F)C(F)(F)C(F)(F)C(F)(F)C(F)(F)C(F)(F)C(F)(F)C(F)(F)F)CCSC(F)(F)C(F)(F)C(F)(F)C(F)(F)C(F)(F)C(F)(F)C(F)(F)C(F)(F)C(F)(F)C(F)(F)F	1		178	YES
DTXSID80881172	Diammonium (perfluorooctyl)-2-hydroxypropyl phosphate	94200-45-0	[NH4+].[NH4+].OC(COP([O-])([O-])=O)CC(F)(F)C(F)(F)C(F)(F)C(F)(F)C(F)(F)C(F)(F)C(F)(F)C(F)(F)F	1	1	187	YES
DTXSID40881017	1,1'-(Oxybis((1-methylethylene)oxy))bis(3-(perfluorododecyl)propan-2-ol)	93776-00-2	CC(COCC(O)CC(F)(F)C(F)(F)C(F)(F)C(F)(F)C(F)(F)C(F)(F)C(F)(F)C(F)(F)C(F)(F)C(F)(F)C(F)(F)C(F)(F)F)OC(C)COCC(O)CC(F)(F)C(F)(F)C(F)(F)C(F)(F)C(F)(F)C(F)(F)C(F)(F)C(F)(F)C(F)(F)C(F)(F)C(F)(F)C(F)(F)F	1	1	188	YES
DTXSID90880979	(Perfluoro-n-octyl)ethane	77117-48-7	CCC(F)(F)C(F)(F)C(F)(F)C(F)(F)C(F)(F)C(F)(F)C(F)(F)C(F)(F)F	1	1	189	YES
DTXSID30895229	1-(Perfluorooctyl)propane	1835250-28-6	CCCC(F)(F)C(F)(F)C(F)(F)C(F)(F)C(F)(F)C(F)(F)C(F)(F)C(F)(F)F	1	1	190	YES
DTXSID40895230	1-(Perfluorooctyl)butane	182130-12-7	CCCCC(F)(F)C(F)(F)C(F)(F)C(F)(F)C(F)(F)C(F)(F)C(F)(F)C(F)(F)F	1	1	191	YES
DTXSID50895246	1-(Perfluorooctyl)pentane	1835250-47-9	CCCCCC(F)(F)C(F)(F)C(F)(F)C(F)(F)C(F)(F)C(F)(F)C(F)(F)C(F)(F)F	1	1	192	YES
DTXSID80895254	1-(Perfluorooctyl)hexane	182130-14-9	CCCCCCC(F)(F)C(F)(F)C(F)(F)C(F)(F)C(F)(F)C(F)(F)C(F)(F)C(F)(F)F	1	1	193	YES
DTXSID60895257	1-(Perfluorooctyl)heptane	182130-15-0	CCCCCCCC(F)(F)C(F)(F)C(F)(F)C(F)(F)C(F)(F)C(F)(F)C(F)(F)C(F)(F)F	1	1	194	YES
DTXSID50387373	1-Perfluorooctyl octane	6145-05-7	CCCCCCCCC(F)(F)C(F)(F)C(F)(F)C(F)(F)C(F)(F)C(F)(F)C(F)(F)C(F)(F)F	1	1	195	YES
DTXSID70895263	1-(Perfluorooctyl)nonane	931415-52-0	CCCCCCCCCC(F)(F)C(F)(F)C(F)(F)C(F)(F)C(F)(F)C(F)(F)C(F)(F)C(F)(F)F	1	1	196	YES
DTXSID90381976	1-(Perfluoro-n-octyl)decane	138472-76-1	CCCCCCCCCCC(F)(F)C(F)(F)C(F)(F)C(F)(F)C(F)(F)C(F)(F)C(F)(F)C(F)(F)F	1	1	197	YES
DTXSID40381981	1-(Perfluoro-n-octyl)hexadecane	117146-18-6	CCCCCCCCCCCCCCCCC(F)(F)C(F)(F)C(F)(F)C(F)(F)C(F)(F)C(F)(F)C(F)(F)C(F)(F)F	1	1	198	YES
DTXSID60881377	1-(Perfluorooctyl)octadecane	133310-73-3	CCCCCCCCCCCCCCCCCCC(F)(F)C(F)(F)C(F)(F)C(F)(F)C(F)(F)C(F)(F)C(F)(F)C(F)(F)F	1	1	199	YES
DTXSID00881376	1-(Perfluorooctyl)eicosane	137338-39-7	CCCCCCCCCCCCCCCCCCCCC(F)(F)C(F)(F)C(F)(F)C(F)(F)C(F)(F)C(F)(F)C(F)(F)C(F)(F)F	1	1	200	YES
DTXSID30881384	1-(Perfluorooctyl)docosane	137338-40-0	CCCCCCCCCCCCCCCCCCCCCCC(F)(F)C(F)(F)C(F)(F)C(F)(F)C(F)(F)C(F)(F)C(F)(F)C(F)(F)F	1	1	201	YES
DTXSID90881385	1-(Perfluorooctyl)tetracosane	137338-41-1	CCCCCCCCCCCCCCCCCCCCCCCCC(F)(F)C(F)(F)C(F)(F)C(F)(F)C(F)(F)C(F)(F)C(F)(F)C(F)(F)F	1	1	202	YES
DTXSID60895252	1-(Perfluorodecyl)ethane	154478-87-2	CCC(F)(F)C(F)(F)C(F)(F)C(F)(F)C(F)(F)C(F)(F)C(F)(F)C(F)(F)C(F)(F)C(F)(F)F	1	1	203	YES
DTXSID90895260	1-(Perfluoro-n-decyl)propane	1835251-22-3	CCCC(F)(F)C(F)(F)C(F)(F)C(F)(F)C(F)(F)C(F)(F)C(F)(F)C(F)(F)C(F)(F)C(F)(F)F	1	1	204	YES
DTXSID00895276	1-(Perfluorodecanyl)butane	1244062-17-6	CCCCC(F)(F)C(F)(F)C(F)(F)C(F)(F)C(F)(F)C(F)(F)C(F)(F)C(F)(F)C(F)(F)C(F)(F)F	1	1	205	YES
DTXSID20895273	1-(Perfluorodecanyl)pentane	250738-42-2	CCCCCC(F)(F)C(F)(F)C(F)(F)C(F)(F)C(F)(F)C(F)(F)C(F)(F)C(F)(F)C(F)(F)C(F)(F)F	1	1	206	YES
DTXSID70895288	1-(Perfluorodecyl)hexane	116177-54-9	CCCCCCC(F)(F)C(F)(F)C(F)(F)C(F)(F)C(F)(F)C(F)(F)C(F)(F)C(F)(F)C(F)(F)C(F)(F)F	1	1	207	YES
DTXSID00895296	1-(Perfluorodecyl)heptane	200817-54-5	CCCCCCCC(F)(F)C(F)(F)C(F)(F)C(F)(F)C(F)(F)C(F)(F)C(F)(F)C(F)(F)C(F)(F)C(F)(F)F	1	1	208	YES
DTXSID80895310	1-(Perfluorodecyl)octane	93454-70-7	CCCCCCCCC(F)(F)C(F)(F)C(F)(F)C(F)(F)C(F)(F)C(F)(F)C(F)(F)C(F)(F)C(F)(F)C(F)(F)F	1	1	209	YES
DTXSID20895334	1-(Perfluorodecanyl)nonane	125635-85-0	CCCCCCCCCC(F)(F)C(F)(F)C(F)(F)C(F)(F)C(F)(F)C(F)(F)C(F)(F)C(F)(F)C(F)(F)C(F)(F)F	1	1	210	YES
DTXSID60895353	1-(Perfluorodecyl)decane	90499-29-9	CCCCCCCCCCC(F)(F)C(F)(F)C(F)(F)C(F)(F)C(F)(F)C(F)(F)C(F)(F)C(F)(F)C(F)(F)C(F)(F)F	1	1	211	YES
DTXSID80895355	12-(Perfluorodecanyl)dodecane	93454-71-8	CCCCCCCCCCCCC(F)(F)C(F)(F)C(F)(F)C(F)(F)C(F)(F)C(F)(F)C(F)(F)C(F)(F)C(F)(F)C(F)(F)F	1	1	212	YES
DTXSID60895474	1,4-Bis(perfluorooctyl)butane	133299-41-9	FC(F)(F)C(F)(F)C(F)(F)C(F)(F)C(F)(F)C(F)(F)C(F)(F)C(F)(F)CCCCC(F)(F)C(F)(F)C(F)(F)C(F)(F)C(F)(F)C(F)(F)C(F)(F)C(F)(F)F	1	1	213	YES
DTXSID20895475	1,8-Bis(perfluorooctyl)octane	100550-08-1	FC(F)(F)C(F)(F)C(F)(F)C(F)(F)C(F)(F)C(F)(F)C(F)(F)C(F)(F)CCCCCCCCC(F)(F)C(F)(F)C(F)(F)C(F)(F)C(F)(F)C(F)(F)C(F)(F)C(F)(F)F	1	1	214	YES
DTXSID20895551	1-(Perfluorooctyl)-1-hexadecene	1244062-16-5	CCCCCCCCCCCCCCC=CC(F)(F)C(F)(F)C(F)(F)C(F)(F)C(F)(F)C(F)(F)C(F)(F)C(F)(F)F	1	1	215	YES
DTXSID401032739	3-(Perfluoro-7-methyloctyl)propanol	31200-97-2	OCCCC(F)(F)C(F)(F)C(F)(F)C(F)(F)C(F)(F)C(F)(F)C(F)(C(F)(F)F)C(F)(F)F	1		216	YES
DTXSID80336475	8:1 Fluorotelomer alcohol	423-56-3	OCC(F)(F)C(F)(F)C(F)(F)C(F)(F)C(F)(F)C(F)(F)C(F)(F)C(F)(F)F	1	1	217	YES
DTXSID00369826	9:1 Fluorotelomer alcohol	307-37-9	OCC(F)(F)C(F)(F)C(F)(F)C(F)(F)C(F)(F)C(F)(F)C(F)(F)C(F)(F)C(F)(F)F	1	1	218	YES
DTXSID00380056	10:1 Fluorotelomer alcohol	307-46-0	OCC(F)(F)C(F)(F)C(F)(F)C(F)(F)C(F)(F)C(F)(F)C(F)(F)C(F)(F)C(F)(F)C(F)(F)F	1	1	219	YES
DTXSID10895489	2-(Perfluorooctyl)ethanal	135984-68-8	FC(F)(F)C(F)(F)C(F)(F)C(F)(F)C(F)(F)C(F)(F)C(F)(F)C(F)(F)CC=O	1	1	220	YES
DTXSID40895538	2-(Perfluorodecyl)ethanal	864551-38-2	FC(F)(F)C(F)(F)C(F)(F)C(F)(F)C(F)(F)C(F)(F)C(F)(F)C(F)(F)C(F)(F)C(F)(F)CC=O	1	1	221	YES
DTXSID20895657	3-(Perfluorononyl)-3-fluoropropenal	864551-40-6	FC(=CC=O)C(F)(F)C(F)(F)C(F)(F)C(F)(F)C(F)(F)C(F)(F)C(F)(F)C(F)(F)C(F)(F)F	1	1	222	YES
DTXSID20561002	(Perfluorooctane)-1-carbaldehydle	63967-40-8	FC(F)(F)C(F)(F)C(F)(F)C(F)(F)C(F)(F)C(F)(F)C(F)(F)C(F)(F)C=O	1		223	YES
DTXSID801032812	Perfluorodecanal	335-73-9	FC(F)(F)C(F)(F)C(F)(F)C(F)(F)C(F)(F)C(F)(F)C(F)(F)C(F)(F)C(F)(F)C=O	1		224	YES
DTXSID80895532	Perfluoroundecanal	63967-42-0	FC(F)(F)C(F)(F)C(F)(F)C(F)(F)C(F)(F)C(F)(F)C(F)(F)C(F)(F)C(F)(F)C(F)(F)C=O	1	1	225	YES
DTXSID101033057	8-(Perfluorooctyl)-3,6-dioxaoctanol	56900-98-2	OCCOCCOCCC(F)(F)C(F)(F)C(F)(F)C(F)(F)C(F)(F)C(F)(F)C(F)(F)C(F)(F)F	1		226	YES
DTXSID301033053	14-(Perfluorooctyl)-3,6,9,12-tetraoxatetradecan-1-ol	55427-54-8	OCCOCCOCCOCCOCCC(F)(F)C(F)(F)C(F)(F)C(F)(F)C(F)(F)C(F)(F)C(F)(F)C(F)(F)F	1		229	YES
DTXSID701034003	20-(Perfluorooctyl)-3,6,9,12,15,18-hexaoxaeicosan-1-ol	88247-39-6	OCCOCCOCCOCCOCCOCCOCCC(F)(F)C(F)(F)C(F)(F)C(F)(F)C(F)(F)C(F)(F)C(F)(F)C(F)(F)F	1		233	YES
DTXSID901034009	26-(Perfluorooctyl)-3,6,9,12,15,18,21,24-octaoxahexaeicosan-1-ol	88247-40-9	OCCOCCOCCOCCOCCOCCOCCOCCOCCC(F)(F)C(F)(F)C(F)(F)C(F)(F)C(F)(F)C(F)(F)C(F)(F)C(F)(F)F	1		237	YES
DTXSID401032496	3-[(Perfluorooctyl)ethyloxy]-1,2-propanediol	121500-31-0	OCC(O)COCCC(F)(F)C(F)(F)C(F)(F)C(F)(F)C(F)(F)C(F)(F)C(F)(F)C(F)(F)F	1		240	YES
DTXSID401033482	1-(Perfluorooctyl)-3,6,9,12,15,18,21,24-octaoxatetracontan-25-one	67549-47-7	CCCCCCCCCCCCCCCC(=O)OCCOCCOCCOCCOCCOCCOCCOCCC(F)(F)C(F)(F)C(F)(F)C(F)(F)C(F)(F)C(F)(F)C(F)(F)C(F)(F)F	1		241	YES
DTXSID701033479	1-(Perfluorooctyl)-3,6,9,12,15,18,21,24,27-nonaoxatetracontan-28-one	67535-33-5	CCCCCCCCCCCCC(=O)OCCOCCOCCOCCOCCOCCOCCOCCOCCC(F)(F)C(F)(F)C(F)(F)C(F)(F)C(F)(F)C(F)(F)C(F)(F)C(F)(F)F	1		242	YES
DTXSID50880415	3-(Perfluorooctyl)-1,2-propenoxide	38565-53-6	FC(F)(F)C(F)(F)C(F)(F)C(F)(F)C(F)(F)C(F)(F)C(F)(F)C(F)(F)CC1CO1	1	1	243	YES
DTXSID001032420	2-(Perfluorooctyl)ethoxymethyloxirane	114482-33-6	FC(F)(F)C(F)(F)C(F)(F)C(F)(F)C(F)(F)C(F)(F)C(F)(F)C(F)(F)CCOCC1CO1	1		244	YES
DTXSID001034345	2-(Perfluorooctyl)-2-hydroxy-N,N-Diethyl-N-methylethanaminium iodide	99679-40-0	[I-].CC[N+](C)(CC)CC(O)C(F)(F)C(F)(F)C(F)(F)C(F)(F)C(F)(F)C(F)(F)C(F)(F)C(F)(F)F	1		245	YES
DTXSID00881053	Bis(2-hydroxyethyl)methyl(3-(perfluorooctyl)-2-hydroxypropyl)ammonium iodide	93776-18-2	[I-].C[N+](CCO)(CCO)CC(O)CC(F)(F)C(F)(F)C(F)(F)C(F)(F)C(F)(F)C(F)(F)C(F)(F)C(F)(F)F	1	1	246	YES
DTXSID50895948	2-[(Butan-2-yl)amino]-1-(perfluorononyl)ethan-1-ol	94817-79-5	CCC(C)NCC(O)C(F)(F)C(F)(F)C(F)(F)C(F)(F)C(F)(F)C(F)(F)C(F)(F)C(F)(F)C(F)(F)F	1	1	247	YES
DTXSID901034304	3-(Perfluorononyl)-2-hydroxy-N-(1-methylpropyl)propylamine	94817-80-8	CCC(C)NCC(O)CC(F)(F)C(F)(F)C(F)(F)C(F)(F)C(F)(F)C(F)(F)C(F)(F)C(F)(F)C(F)(F)F	1		248	YES
DTXSID401032515	3-[[4-[(Perfluorooctyl)ethoxy]-1,4-dioxo-2-buten-1-yl]amino]-N,N,N-trimethyl-1-propanaminium iodide (1:1)	121912-26-3	[I-].C[N+](C)(C)CCCNC(=O)C=CC(=O)OCCC(F)(F)C(F)(F)C(F)(F)C(F)(F)C(F)(F)C(F)(F)C(F)(F)C(F)(F)F	1		249	YES
DTXSID50880238	1-[(Perfluorooctyl)ethyl]pyridinium iodide	25935-14-2	[I-].FC(F)(F)C(F)(F)C(F)(F)C(F)(F)C(F)(F)C(F)(F)C(F)(F)C(F)(F)CC[N+]1=CC=CC=C1	1	1	250	YES
DTXSID201033074	8:2 Fluorotelomer N,N-dimethyl-, N-oxide	NOCAS_1033074	CN(C)(=O)CCC(F)(F)C(F)(F)C(F)(F)C(F)(F)C(F)(F)C(F)(F)C(F)(F)C(F)(F)F	1		252	YES
DTXSID001033161	9:2 Fluorotelomer N,N-dimethyl-, N-oxide	NOCAS_1033161	CN(C)(=O)CCC(F)(F)C(F)(F)C(F)(F)C(F)(F)C(F)(F)C(F)(F)C(F)(F)C(F)(F)C(F)(F)F	1		253	YES
DTXSID301032574	(Carboxymethyl)[(heptadecafluorooctyl)ethyl]dimethylazanium	2089109-26-0	C[N+](C)(CCC(F)(F)C(F)(F)C(F)(F)C(F)(F)C(F)(F)C(F)(F)C(F)(F)C(F)(F)F)CC(O)=O	1		255	YES
DTXSID401032589	(Carboxylatomethyl)[(henicosafluorodecyl)ethyl]dimethylazanium	2089109-27-1	C[N+](C)(CCC(F)(F)C(F)(F)C(F)(F)C(F)(F)C(F)(F)C(F)(F)C(F)(F)C(F)(F)C(F)(F)C(F)(F)F)CC([O-])=O	1		256	YES
DTXSID701032764	8:2 Fluorotelomer betaine ion	145441-32-3	C[N+](C)(CCC(F)(F)C(F)(F)C(F)(F)C(F)(F)C(F)(F)C(F)(F)C(F)(F)C(F)(F)F)CC([O-])=O	1		257	YES
DTXSID80892521	9:3 Fluorotelomer betaine	171184-16-0	C[N+](C)(CCCC(F)(F)C(F)(F)C(F)(F)C(F)(F)C(F)(F)C(F)(F)C(F)(F)C(F)(F)C(F)(F)F)CC([O-])=O	1		258	YES
DTXSID80892566	11:3 Fluorotelomer betaine	171184-17-1	C[N+](C)(CCCC(F)(F)C(F)(F)C(F)(F)C(F)(F)C(F)(F)C(F)(F)C(F)(F)C(F)(F)C(F)(F)C(F)(F)C(F)(F)F)CC([O-])=O	1		259	YES
DTXSID20892520	9:1:2 Fluorotelomer betaine	171184-04-6	C[N+](C)(CCC(F)C(F)(F)C(F)(F)C(F)(F)C(F)(F)C(F)(F)C(F)(F)C(F)(F)C(F)(F)C(F)(F)F)CC([O-])=O	1		260	YES
DTXSID701032590	(Carboxylatomethyl)[(heptadecafluorooctyl)butyl]dimethylazanium	2089109-30-6	C[N+](C)(CCCCC(F)(F)C(F)(F)C(F)(F)C(F)(F)C(F)(F)C(F)(F)C(F)(F)C(F)(F)F)CC([O-])=O	1		261	YES
DTXSID101033669	2‐{[2‐(Acetyloxy)‐3-(perfluorooctyl)propyl]dimethylazaniumyl}acetate	80234-03-3	CC(=O)OC(CC(F)(F)C(F)(F)C(F)(F)C(F)(F)C(F)(F)C(F)(F)C(F)(F)C(F)(F)F)C[N+](C)(C)CC([O-])=O	1		262	YES
DTXSID101033671	2‐{[2‐(Acetyloxy)‐3-(perfluorodecyl)propyl]dimethylazaniumyl}acetate	80244-66-2	CC(=O)OC(CC(F)(F)C(F)(F)C(F)(F)C(F)(F)C(F)(F)C(F)(F)C(F)(F)C(F)(F)C(F)(F)C(F)(F)F)C[N+](C)(C)CC([O-])=O	1		263	YES
DTXSID20337446	2-(Perfluorooctyl)ethanthiol	34143-74-3	FC(F)(F)C(F)(F)C(F)(F)C(F)(F)C(F)(F)C(F)(F)C(F)(F)C(F)(F)CCS	1	1	264	YES
DTXSID00192353	8:2 Fluorotelomer sulfonic acid	39108-34-4	OS(=O)(=O)CCC(F)(F)C(F)(F)C(F)(F)C(F)(F)C(F)(F)C(F)(F)C(F)(F)C(F)(F)F	1	1	267	YES
DTXSID50892578	10:2 Fluorotelomer sulfonic acid	120226-60-0	OS(=O)(=O)CCC(F)(F)C(F)(F)C(F)(F)C(F)(F)C(F)(F)C(F)(F)C(F)(F)C(F)(F)C(F)(F)C(F)(F)F	1	1	268	YES
DTXSID501032920	Potassium 2-(perfluorooctyl)ethane-1‐sulfonate	438237-73-1	[K+].[O-]S(=O)(=O)CCC(F)(F)C(F)(F)C(F)(F)C(F)(F)C(F)(F)C(F)(F)C(F)(F)C(F)(F)F	1		269	YES
DTXSID40897552	1H,1H,2H,2H-Perfluorodecanol sulfate ammonium salt	63225-57-0	[NH4+].[O-]S(=O)(=O)OCCC(F)(F)C(F)(F)C(F)(F)C(F)(F)C(F)(F)C(F)(F)C(F)(F)C(F)(F)F	1	1	270	YES
DTXSID80897551	1H,1H,2H,2H-Perfluorododecanol sulfate ammonium salt	63225-58-1	[NH4+].[O-]S(=O)(=O)OCCC(F)(F)C(F)(F)C(F)(F)C(F)(F)C(F)(F)C(F)(F)C(F)(F)C(F)(F)C(F)(F)C(F)(F)F	1	1	271	YES
DTXSID201033050	Sodium 1,4‐bis[(perfluorooctyl)ethoxy]‐1,4‐dioxobutane‐2‐sulfonate	54950-06-0	[Na+].[O-]S(=O)(=O)C(CC(=O)OCCC(F)(F)C(F)(F)C(F)(F)C(F)(F)C(F)(F)C(F)(F)C(F)(F)C(F)(F)F)C(=O)OCCC(F)(F)C(F)(F)C(F)(F)C(F)(F)C(F)(F)C(F)(F)C(F)(F)C(F)(F)F	1		272	YES
DTXSID901032922	Lithium 2‐[(perfluorooctyl)ethylsulfanyl]acetate	441765-12-4	[Li+].[O-]C(=O)CSCCC(F)(F)C(F)(F)C(F)(F)C(F)(F)C(F)(F)C(F)(F)C(F)(F)C(F)(F)F	1		273	YES
DTXSID20892601	8:2:2 Fluorotelomer thioether propanoic acid	54207-62-4	OC(=O)CCSCCC(F)(F)C(F)(F)C(F)(F)C(F)(F)C(F)(F)C(F)(F)C(F)(F)C(F)(F)F	1		274	YES
DTXSID001032937	Lithium 3‐[(perfluorooctyl)ethylsulfanyl]propanoate	481050-04-8	[Li+].[O-]C(=O)CCSCCC(F)(F)C(F)(F)C(F)(F)C(F)(F)C(F)(F)C(F)(F)C(F)(F)C(F)(F)F	1		275	YES
DTXSID301032924	2-[(Perfluorooctyl)ethylthio]ethanesulfonic acid lithium salt	441765-14-6	[Li+].[O-]S(=O)(=O)CCSCCC(F)(F)C(F)(F)C(F)(F)C(F)(F)C(F)(F)C(F)(F)C(F)(F)C(F)(F)F	1		276	YES
DTXSID101032942	1,3-Bis[(perfluorooctyl)ethylthio]-2-propanol	160819-47-6	OC(CSCCC(F)(F)C(F)(F)C(F)(F)C(F)(F)C(F)(F)C(F)(F)C(F)(F)C(F)(F)F)CSCCC(F)(F)C(F)(F)C(F)(F)C(F)(F)C(F)(F)C(F)(F)C(F)(F)C(F)(F)F	1		277	YES
DTXSID501032944	1-[(2-Dodecylhexadecyl)oxy]-3-[(perfluorooctyl)ethylthio]-2-propanol	160819-50-1	CCCCCCCCCCCCCCC(CCCCCCCCCCCC)COCC(O)CSCCC(F)(F)C(F)(F)C(F)(F)C(F)(F)C(F)(F)C(F)(F)C(F)(F)C(F)(F)F	1		278	YES
DTXSID801032943	1-[(2-Decyltetradecyl)oxy]-3-[(perfluorooctyl)ethylthio]-2-propanol	160819-49-8	CCCCCCCCCCCCC(CCCCCCCCCC)COCC(O)CSCCC(F)(F)C(F)(F)C(F)(F)C(F)(F)C(F)(F)C(F)(F)C(F)(F)C(F)(F)F	1		279	YES
DTXSID701032526	29-(Perfluorooctyl)-2,5,8,11,14,17,20,23-octaoxa-27-thianonaicosan-25-ol	121912-28-5	COCCOCCOCCOCCOCCOCCOCCOCC(O)CSCCC(F)(F)C(F)(F)C(F)(F)C(F)(F)C(F)(F)C(F)(F)C(F)(F)C(F)(F)F	1		280	YES
DTXSID50892598	8:2 Fluorotelomer thioether hydroxyammonium	727351-53-3	C[N+](C)(C)CC(O)CSCCC(F)(F)C(F)(F)C(F)(F)C(F)(F)C(F)(F)C(F)(F)C(F)(F)C(F)(F)F	1		281	YES
DTXSID601036094	[3-(2-(Perfluorodecyl)ethylsulfanyl)-2-hydroxypropyl]-trimethylazanium	1513864-17-9	C[N+](C)(C)CC(O)CSCCC(F)(F)C(F)(F)C(F)(F)C(F)(F)C(F)(F)C(F)(F)C(F)(F)C(F)(F)C(F)(F)C(F)(F)F	1		282	YES
DTXSID10892599	8:2 Fluorotelomer thioether hydroxyammonium chloride	71940-07-3	[Cl-].C[N+](C)(C)CC(O)CSCCC(F)(F)C(F)(F)C(F)(F)C(F)(F)C(F)(F)C(F)(F)C(F)(F)C(F)(F)F	1		283	YES
DTXSID601335074	2-Hydroxy-N,N,N-trimethyl-3-[((perfluorodecyl)ethyl)thio]-1-propanaminium chloride	NOCAS_1335074	[Cl-].C[N+](C)(C)CC(O)CSCCC(F)(F)C(F)(F)C(F)(F)C(F)(F)C(F)(F)C(F)(F)C(F)(F)C(F)(F)C(F)(F)C(F)(F)F			284	YES
DTXSID801033527	2-[2-[(Perfluorooctyl)ethylthio]ethoxy]-N,N,N-trimethyl ethanaminium iodide (1:1)	71625-52-0	[I-].C[N+](C)(C)CCOCCSCCC(F)(F)C(F)(F)C(F)(F)C(F)(F)C(F)(F)C(F)(F)C(F)(F)C(F)(F)F	1		285	YES
DTXSID901032803	N-[3-(Dimethylamino)propyl]-2-[(perfluorooctyl)ethylthio]acetamide	1513863-91-6	CN(C)CCCNC(=O)CSCCC(F)(F)C(F)(F)C(F)(F)C(F)(F)C(F)(F)C(F)(F)C(F)(F)C(F)(F)F	1		286	YES
DTXSID301032805	N-[3-(Dimethylamino)propyl]-2-[(perfluorodecyl)ethylthio]acetamide	1513863-92-7	CN(C)CCCNC(=O)CSCCC(F)(F)C(F)(F)C(F)(F)C(F)(F)C(F)(F)C(F)(F)C(F)(F)C(F)(F)C(F)(F)C(F)(F)F	1		287	YES
DTXSID201033498	3-[[2-[(Perfluorooctyl)ethylthio]acetyl]amino]-N,N,N-trimethyl-1-propanaminium	704870-51-9	C[N+](C)(C)CCCNC(=O)CSCCC(F)(F)C(F)(F)C(F)(F)C(F)(F)C(F)(F)C(F)(F)C(F)(F)C(F)(F)F	1		288	YES
DTXSID301032817	3-[[2-[(Perfluorodecyl)ethylthio]acetyl]amino]-N,N,N-trimethyl-1-propanaminium	1513864-01-1	C[N+](C)(C)CCCNC(=O)CSCCC(F)(F)C(F)(F)C(F)(F)C(F)(F)C(F)(F)C(F)(F)C(F)(F)C(F)(F)C(F)(F)C(F)(F)F	1		289	YES
DTXSID301033477	10-(Perfluorooctyl)-8-thia-6-methyl-5-oxo-4-aza-N,N-dimethyl-N-ethyl-decanaminium ethyl sulfate (1:1)	67333-62-4	CCOS([O-])(=O)=O.CC[N+](C)(C)CCCNC(=O)C(C)CSCCC(F)(F)C(F)(F)C(F)(F)C(F)(F)C(F)(F)C(F)(F)C(F)(F)C(F)(F)F	1		290	YES
DTXSID00892604	8:2 Fluorotelomer thioether amido betaine	1513863-96-1	C[N+](C)(CCCNC(=O)CSCCC(F)(F)C(F)(F)C(F)(F)C(F)(F)C(F)(F)C(F)(F)C(F)(F)C(F)(F)F)CC([O-])=O	1		291	YES
DTXSID10892579	10:2 Fluorotelomer thioether amido betaine	1513863-97-2	C[N+](C)(CCCNC(=O)CSCCC(F)(F)C(F)(F)C(F)(F)C(F)(F)C(F)(F)C(F)(F)C(F)(F)C(F)(F)C(F)(F)C(F)(F)F)CC([O-])=O	1		292	YES
DTXSID30892596	8:2 Fluorotelomer thioether amido amine carboxylic acid	1383438-89-8	CN(C)CCCNC(=O)CC(SCCC(F)(F)C(F)(F)C(F)(F)C(F)(F)C(F)(F)C(F)(F)C(F)(F)C(F)(F)F)C(O)=O	1		293	YES
DTXSID60892589	10:2 Fluorotelomer thioether amido amine carboxylic acid	1383438-90-1	CN(C)CCCNC(=O)CC(SCCC(F)(F)C(F)(F)C(F)(F)C(F)(F)C(F)(F)C(F)(F)C(F)(F)C(F)(F)C(F)(F)C(F)(F)F)C(O)=O	1		294	YES
DTXSID70896119	N-{3-[2-(Perfluorooctyl)ethylsulfanyl]-2-hydroxypropyl}-N-methylglycine	93128-66-6	CN(CC(O)CSCCC(F)(F)C(F)(F)C(F)(F)C(F)(F)C(F)(F)C(F)(F)C(F)(F)C(F)(F)F)CC(O)=O	1	1	295	YES
DTXSID30892334	8:2 Fluorotelomer thioether amido sulfonic acid	755698-73-8	CC(C)(CS(O)(=O)=O)NC(=O)CCSCCC(F)(F)C(F)(F)C(F)(F)C(F)(F)C(F)(F)C(F)(F)C(F)(F)C(F)(F)F	1		296	YES
DTXSID60892584	10:2 Fluorotelomer thioether amido sulfonic acid	690947-60-5	CC(C)(CS(O)(=O)=O)NC(=O)CCSCCC(F)(F)C(F)(F)C(F)(F)C(F)(F)C(F)(F)C(F)(F)C(F)(F)C(F)(F)C(F)(F)C(F)(F)F	1		297	YES
DTXSID201033343	Sodium 2-[[3-[(perfluorooctyl)ethylthio]-1-oxopropyl]amino]-2-methyl-1-propanesulfonate	62880-96-0	[Na+].CC(C)(CS([O-])(=O)=O)NC(=O)CCSCCC(F)(F)C(F)(F)C(F)(F)C(F)(F)C(F)(F)C(F)(F)C(F)(F)C(F)(F)F	1		298	YES
DTXSID601033345	Sodium 2-[[3-[(perfluorodecyl)ethylthio]-1-oxopropyl]amino]-2-methyl-1-propanesulfonate	62880-98-2	[Na+].CC(C)(CS([O-])(=O)=O)NC(=O)CCSCCC(F)(F)C(F)(F)C(F)(F)C(F)(F)C(F)(F)C(F)(F)C(F)(F)C(F)(F)C(F)(F)C(F)(F)F	1		299	YES
DTXSID10892594	8:2 Fluorotelomer sulfoxide hydroxyammonium	1513864-19-1	C[N+](C)(C)CC(O)CS(=O)CCC(F)(F)C(F)(F)C(F)(F)C(F)(F)C(F)(F)C(F)(F)C(F)(F)C(F)(F)F	1		300	YES
DTXSID60892605	8:2 Fluorotelomer sulfoxide amido sulfonic acid	1513864-12-4	CC(C)(CS(O)(=O)=O)NC(=O)CCS(=O)CCC(F)(F)C(F)(F)C(F)(F)C(F)(F)C(F)(F)C(F)(F)C(F)(F)C(F)(F)F	1		301	YES
DTXSID701032821	2-[[3-[(Perfluorodecyl)ethylsulfinyl]-1-oxopropyl]amino]-2-methyl-1-propanesulfonic acid	1513864-11-3	CC(C)(CS(O)(=O)=O)NC(=O)CCS(=O)CCC(F)(F)C(F)(F)C(F)(F)C(F)(F)C(F)(F)C(F)(F)C(F)(F)C(F)(F)C(F)(F)C(F)(F)F	1		302	YES
DTXSID301033677	N-[3-(N,N-Dimethyl-N-oxidoamino)propyl]-2-(perfluorooctyl)ethanesulfonamide	80475-33-8	C[N+](C)([O-])CCCNS(=O)(=O)CCC(F)(F)C(F)(F)C(F)(F)C(F)(F)C(F)(F)C(F)(F)C(F)(F)C(F)(F)F	1		303	YES
DTXSID60892524	8:2 Fluorotelomer sulfonamido N,N-dimethyl amine	34455-23-7	[H]N(CCCN(C)C)S(=O)(=O)CCC(F)(F)C(F)(F)C(F)(F)C(F)(F)C(F)(F)C(F)(F)C(F)(F)C(F)(F)F	1		304	YES
DTXSID80892607	10:2 Fluorotelomer sulfonamido N,N-dimethyl amine	34455-24-8	[H]N(CCCN(C)C)S(=O)(=O)CCC(F)(F)C(F)(F)C(F)(F)C(F)(F)C(F)(F)C(F)(F)C(F)(F)C(F)(F)C(F)(F)C(F)(F)F	1		305	YES
DTXSID40882827	3-[((Perfluorooctyl)ethyl)sulfonyl]amino-N,N,N-trimethyl-1-propanaminium 4-methylbenzenesulfonate	438237-77-5	CC1=CC=C(C=C1)S([O-])(=O)=O.C[N+](C)(C)CCCNS(=O)(=O)CCC(F)(F)C(F)(F)C(F)(F)C(F)(F)C(F)(F)C(F)(F)C(F)(F)C(F)(F)F	1	1	306	YES
DTXSID70880432	8:2 Fluorotelomer sulfonamide betaine	34455-21-5	C[N+](C)(CCCNS(=O)(=O)CCC(F)(F)C(F)(F)C(F)(F)C(F)(F)C(F)(F)C(F)(F)C(F)(F)C(F)(F)F)CC([O-])=O	1	1	307	YES
DTXSID90880434	10:2 Fluorotelomer sulfonamide betaine	34455-35-1	C[N+](C)(CCCNS(=O)(=O)CCC(F)(F)C(F)(F)C(F)(F)C(F)(F)C(F)(F)C(F)(F)C(F)(F)C(F)(F)C(F)(F)C(F)(F)F)CC([O-])=O	1	1	308	YES
DTXSID601032830	3-[Dimethyl(2-{[(perfluorooctyl) sulfonyl]amino}ethyl)ammonio]propanoate	34695-29-9	C[N+](C)(CCNS(=O)(=O)CCC(F)(F)C(F)(F)C(F)(F)C(F)(F)C(F)(F)C(F)(F)C(F)(F)C(F)(F)F)CCC([O-])=O	1		309	YES
DTXSID001032832	2-Carboxy-N,N-dimethyl-N-[2-[[(perfluorodecyl)- sulfonyl ]amino]ethyl]-, ethanaminum inner salt	34695-31-3	C[N+](C)(CCNS(=O)(=O)CCC(F)(F)C(F)(F)C(F)(F)C(F)(F)C(F)(F)C(F)(F)C(F)(F)C(F)(F)C(F)(F)C(F)(F)F)CCC([O-])=O	1		310	YES
DTXSID401032927	N-[(Perfluorooctyl)ethylsulfonyl]-N-propylglycine lithium salt	441765-18-0	[Li+].CCCN(CC([O-])=O)S(=O)(=O)CCC(F)(F)C(F)(F)C(F)(F)C(F)(F)C(F)(F)C(F)(F)C(F)(F)C(F)(F)F	1		311	YES
DTXSID501034338	Dipotassium N-(2-Carboxyethyl)-N-[6-[2-(perfluorooctyl)ethanesulfonylamino]hexyl]-beta-alanine salt	98900-53-9	[K+].[K+].[O-]C(=O)CCN(CCCCCCNS(=O)(=O)CCC(F)(F)C(F)(F)C(F)(F)C(F)(F)C(F)(F)C(F)(F)C(F)(F)C(F)(F)F)CCC([O-])=O	1		312	YES
DTXSID70880952	1-(Carboxymethyl)-1-(2-hydroxyethyl)-4-(perfluoro-1-oxodecyl)piperazinium	71356-38-2	OCC[N+]1(CC([O-])=O)CCN(CC1)C(=O)C(F)(F)C(F)(F)C(F)(F)C(F)(F)C(F)(F)C(F)(F)C(F)(F)C(F)(F)C(F)(F)F	1	1	323	YES
DTXSID10404732	Tris[4-[(perfluorooctyl)ethyl]phenyl]phosphane	325459-92-5	FC(F)(F)C(F)(F)C(F)(F)C(F)(F)C(F)(F)C(F)(F)C(F)(F)C(F)(F)CCC1=CC=C(C=C1)P(C1=CC=C(CCC(F)(F)C(F)(F)C(F)(F)C(F)(F)C(F)(F)C(F)(F)C(F)(F)C(F)(F)F)C=C1)C1=CC=C(CCC(F)(F)C(F)(F)C(F)(F)C(F)(F)C(F)(F)C(F)(F)C(F)(F)C(F)(F)F)C=C1	1	1	326	YES
DTXSID70897484	Dichloropalladium bis{tris[4-(2-(perfluorooctyl)ethyl)phenyl]phosphane}	326475-46-1	F.Cl[Pd]Cl.FC(F)(F)C(F)(F)C(F)(F)C(F)(F)C(F)(F)C(F)(F)C(F)(F)C(F)(F)CCC1=CC=C(C=C1)P(C1=CC=C(CCC(F)(F)C(F)(F)C(F)(F)C(F)(F)C(F)(F)C(F)(F)C(F)(F)C(F)(F)F)C=C1)C1=CC=C(CCC(F)(F)C(F)(F)C(F)(F)C(F)(F)C(F)(F)C(F)(F)C(F)(F)C(F)(F)F)C=C1.FC(F)(F)C(F)(F)C(F)(F)C(F)(F)C(F)(F)C(F)(F)C(F)(F)C(F)(F)CCC1=CC=C(C=C1)P(C1=CC=C(CCC(F)(F)C(F)(F)C(F)(F)C(F)(F)C(F)(F)C(F)(F)C(F)(F)C(F)(F)F)C=C1)C1=CC=C(CCC(F)(F)C(F)…	1	1	327	YES
DTXSID70192426	N-[2-Carboxylatoethyl)-N,N-bis(2-hydroxyethyl)-3-[(perfluoro-1-oxooctyl)amino]-1-propanaminium	39186-68-0	OCC[N+](CCO)(CCCNC(=O)C(F)(F)C(F)(F)C(F)(F)C(F)(F)C(F)(F)C(F)(F)C(F)(F)F)CCC([O-])=O	1	1	328	YES
DTXSID90194306	N-(3-(Bis(2-hydroxyethyl)amino)propyl)-perfluorooctanamide	41358-63-8	OCCN(CCO)CCCNC(=O)C(F)(F)C(F)(F)C(F)(F)C(F)(F)C(F)(F)C(F)(F)C(F)(F)F	1	1	329	YES
DTXSID20178912	3,4-Bis((perfluoro-1-oxooctyl)amino)benzenesulfonyl chloride	24216-05-5	FC(F)(F)C(F)(F)C(F)(F)C(F)(F)C(F)(F)C(F)(F)C(F)(F)C(=O)NC1=C(NC(=O)C(F)(F)C(F)(F)C(F)(F)C(F)(F)C(F)(F)C(F)(F)C(F)(F)F)C=C(C=C1)S(Cl)(=O)=O	1	1	330	YES
DTXSID90880459	N,N,N-trimethyl-3-[(perfluorooctanoyl)amino]-1-propanaminium chloride	53517-98-9	[Cl-].C[N+](C)(C)CCCNC(=O)C(F)(F)C(F)(F)C(F)(F)C(F)(F)C(F)(F)C(F)(F)C(F)(F)F	1	1	331	YES
DTXSID10721759	N,N,N-Trimethyl-3-[(perfluorooctanoyl)amino]-1-propanaminium iodide	335-90-0	[I-].C[N+](C)(C)CCCNC(=O)C(F)(F)C(F)(F)C(F)(F)C(F)(F)C(F)(F)C(F)(F)C(F)(F)F	1	1	332	YES
DTXSID30235262	N-(3-Aminopropyl)-perfluorooctanamide	85938-56-3	NCCCNC(=O)C(F)(F)C(F)(F)C(F)(F)C(F)(F)C(F)(F)C(F)(F)C(F)(F)F	1	1	333	YES
DTXSID30893301	3-[Ethyl(perfluoro-1-oxooctyl)amino]-1-propanesulfonic acid sodium salt	89685-61-0	[Na+].CCN(CCCS([O-])(=O)=O)C(=O)C(F)(F)C(F)(F)C(F)(F)C(F)(F)C(F)(F)C(F)(F)C(F)(F)F	1	1	334	YES
DTXSID801032698	Ammonium N-ethyl-N-(perfluoro-1-oxooctyl)glycine	138473-79-7	[NH4+].CCN(CC([O-])=O)C(=O)C(F)(F)C(F)(F)C(F)(F)C(F)(F)C(F)(F)C(F)(F)C(F)(F)F	1		336	YES
DTXSID101034055	N-(14-Hydroxy-3,6,9,12-tetraoxatetradec-1-yl)perfluorooctanamide	89932-71-8	OCCOCCOCCOCCOCCNC(=O)C(F)(F)C(F)(F)C(F)(F)C(F)(F)C(F)(F)C(F)(F)C(F)(F)F	1		337	YES
DTXSID901033025	N,N,N-Trimethyl-2-[(perfluoro-1-oxooctyl)amino]ethanaminium chloride	178766-44-4	[Cl-].C[N+](C)(C)CCNC(=O)C(F)(F)C(F)(F)C(F)(F)C(F)(F)C(F)(F)C(F)(F)C(F)(F)F	1		338	YES
DTXSID90892572	N-Dimethyl ammonio propyl-perfluorooctane amide	376-23-8	CN(C)CCCNC(=O)C(F)(F)C(F)(F)C(F)(F)C(F)(F)C(F)(F)C(F)(F)C(F)(F)F	1		339	YES
DTXSID701034108	N,N,N-Trimethyl-5-[(perfluoro-1-oxooctyl)amino]pentanaminium iodide	91707-61-8	[I-].C[N+](C)(C)CCCCCNC(=O)C(F)(F)C(F)(F)C(F)(F)C(F)(F)C(F)(F)C(F)(F)C(F)(F)F	1		340	YES
DTXSID30892571	Perfluorooctaneamido amine oxide	30295-53-5	CN(C)(=O)CCCNC(=O)C(F)(F)C(F)(F)C(F)(F)C(F)(F)C(F)(F)C(F)(F)C(F)(F)F	1		341	YES
DTXSID001032737	1-[2-[(Perfluoro-1-oxooctyl)amino]ethyl]pyridinium chloride	308-01-0	[Cl-].FC(F)(F)C(F)(F)C(F)(F)C(F)(F)C(F)(F)C(F)(F)C(F)(F)C(=O)NCC[N+]1=CC=CC=C1	1		342	YES
DTXSID801032800	1-[2-[(Perfluoro-1-oxooctyl)amino]ethyl]pyridinium bromide	331755-02-3	[Br-].FC(F)(F)C(F)(F)C(F)(F)C(F)(F)C(F)(F)C(F)(F)C(F)(F)C(=O)NCC[N+]1=CC=CC=C1	1		343	YES
DTXSID801032450	1-(2-Hydroxyethyl)-1-methyl-4-(perfluoro-1-oxooctyl)piperazinium chloride (1:1)	103555-98-2	C[N+]1(CCO)CCC(CC1)C(=O)C(F)(F)C(F)(F)C(F)(F)C(F)(F)C(F)(F)C(F)(F)C(F)(F)F	1		344	YES
DTXSID70892590	(Dimethyl{3-[(perfluorooctanoyl)amino]propyl}ammonio)acetate	90179-39-8	C[N+](C)(CCCNC(=O)C(F)(F)C(F)(F)C(F)(F)C(F)(F)C(F)(F)C(F)(F)C(F)(F)F)CC([O-])=O	1	1	345	YES
DTXSID00880208	(2-Carboxylatoethyl)dimethyl[3-(perfluorooctanamido)propyl]ammonium	5158-52-1	C[N+](C)(CCCNC(=O)C(F)(F)C(F)(F)C(F)(F)C(F)(F)C(F)(F)C(F)(F)C(F)(F)F)CCC([O-])=O	1	1	346	YES
DTXSID801033058	Potassium 2-[ethyl(perfluoro-1-oxooctyl)amino]ethanesulfonate	57670-46-9	[K+].CCN(CCS([O-])(=O)=O)C(=O)C(F)(F)C(F)(F)C(F)(F)C(F)(F)C(F)(F)C(F)(F)C(F)(F)F	1		347	YES
DTXSID201034341	Sodium 3-[(3-aminopropyl)(perfluoro-1-oxooctyl)amino]-2-hydroxypropanesulfonate	98900-76-6	[Na+].NCCCN(CC(O)CS([O-])(=O)=O)C(=O)C(F)(F)C(F)(F)C(F)(F)C(F)(F)C(F)(F)C(F)(F)C(F)(F)F	1		348	YES
DTXSID501034340	Sodium 4-[[[3-(methylamino)propyl](perfluoro-1-oxooctyl)amino]methyl]benzenesulfonate	98900-75-5	[Na+].CNCCCN(CC1=CC=C(C=C1)S([O-])(=O)=O)C(=O)C(F)(F)C(F)(F)C(F)(F)C(F)(F)C(F)(F)C(F)(F)C(F)(F)F	1		349	YES
DTXSID301034332	N-[3-(Trimethoxysilyl)propyl]perfluorooctanamide	98046-76-5	CO[Si](CCCNC(=O)C(F)(F)C(F)(F)C(F)(F)C(F)(F)C(F)(F)C(F)(F)C(F)(F)F)(OC)OC	1		350	YES
DTXSID5044572	2-(Perfluorohexyl)ethanol	647-42-7	OCCC(F)(F)C(F)(F)C(F)(F)C(F)(F)C(F)(F)C(F)(F)F	1	1	352	NO
DTXSID5061954	11-H-Perfluoroundecanoic acid	1765-48-6	OC(=O)C(F)(F)C(F)(F)C(F)(F)C(F)(F)C(F)(F)C(F)(F)C(F)(F)C(F)(F)C(F)(F)C(F)F	1	1	354	NO
DTXSID60880123	Potassium 11H-perfluoroundecanoate	307-71-1	[K+].[O-]C(=O)C(F)(F)C(F)(F)C(F)(F)C(F)(F)C(F)(F)C(F)(F)C(F)(F)C(F)(F)C(F)(F)C(F)F	1	1	355	NO
DTXSID4059916	Perfluorobutanoic acid	375-22-4	OC(=O)C(F)(F)C(F)(F)C(F)(F)F	1	1	356	NO
DTXSID6062599	Perfluoropentanoic acid	2706-90-3	OC(=O)C(F)(F)C(F)(F)C(F)(F)C(F)(F)F	1	1	357	NO
DTXSID3031862	Perfluorohexanoic acid	307-24-4	OC(=O)C(F)(F)C(F)(F)C(F)(F)C(F)(F)C(F)(F)F	1	1	358	NO
DTXSID1037303	Perfluoroheptanoic acid	375-85-9	OC(=O)C(F)(F)C(F)(F)C(F)(F)C(F)(F)C(F)(F)C(F)(F)F	1	1	359	NO
DTXSID8031863	Perfluorononanoic acid	375-95-1	OC(=O)C(F)(F)C(F)(F)C(F)(F)C(F)(F)C(F)(F)C(F)(F)C(F)(F)C(F)(F)F	1	1	360	NO
DTXSID3031860	Perfluorodecanoic acid	335-76-2	OC(=O)C(F)(F)C(F)(F)C(F)(F)C(F)(F)C(F)(F)C(F)(F)C(F)(F)C(F)(F)C(F)(F)F	1	1	361	NO
DTXSID8047553	Perfluoroundecanoic acid	2058-94-8	OC(=O)C(F)(F)C(F)(F)C(F)(F)C(F)(F)C(F)(F)C(F)(F)C(F)(F)C(F)(F)C(F)(F)C(F)(F)F	1	1	362	NO
DTXSID8031861	Perfluorododecanoic acid	307-55-1	OC(=O)C(F)(F)C(F)(F)C(F)(F)C(F)(F)C(F)(F)C(F)(F)C(F)(F)C(F)(F)C(F)(F)C(F)(F)C(F)(F)F	1	1	363	NO
DTXSID90868151	Perfluorotridecanoic acid	72629-94-8	OC(=O)C(F)(F)C(F)(F)C(F)(F)C(F)(F)C(F)(F)C(F)(F)C(F)(F)C(F)(F)C(F)(F)C(F)(F)C(F)(F)C(F)(F)F	1	1	364	NO
DTXSID3059921	Perfluorotetradecanoic acid	376-06-7	OC(=O)C(F)(F)C(F)(F)C(F)(F)C(F)(F)C(F)(F)C(F)(F)C(F)(F)C(F)(F)C(F)(F)C(F)(F)C(F)(F)C(F)(F)C(F)(F)F	1	1	365	NO
DTXSID30893341	Perfluoropentadecanoic acid	141074-63-7	OC(=O)C(F)(F)C(F)(F)C(F)(F)C(F)(F)C(F)(F)C(F)(F)C(F)(F)C(F)(F)C(F)(F)C(F)(F)C(F)(F)C(F)(F)C(F)(F)C(F)(F)F	1	1	366	NO
DTXSID1070800	Perfluorohexadecanoic acid	67905-19-5	OC(=O)C(F)(F)C(F)(F)C(F)(F)C(F)(F)C(F)(F)C(F)(F)C(F)(F)C(F)(F)C(F)(F)C(F)(F)C(F)(F)C(F)(F)C(F)(F)C(F)(F)C(F)(F)F	1	1	367	NO
DTXSID60896623	Perfluoroheptadecanoic acid	57475-95-3	OC(=O)C(F)(F)C(F)(F)C(F)(F)C(F)(F)C(F)(F)C(F)(F)C(F)(F)C(F)(F)C(F)(F)C(F)(F)C(F)(F)C(F)(F)C(F)(F)C(F)(F)C(F)(F)C(F)(F)F	1	1	368	NO
DTXSID1066071	Perfluorooctadecanoic acid	16517-11-6	OC(=O)C(F)(F)C(F)(F)C(F)(F)C(F)(F)C(F)(F)C(F)(F)C(F)(F)C(F)(F)C(F)(F)C(F)(F)C(F)(F)C(F)(F)C(F)(F)C(F)(F)C(F)(F)C(F)(F)C(F)(F)F	1	1	369	NO
DTXSID00896622	Perfluorononadecanoic acid	133921-38-7	OC(=O)C(F)(F)C(F)(F)C(F)(F)C(F)(F)C(F)(F)C(F)(F)C(F)(F)C(F)(F)C(F)(F)C(F)(F)C(F)(F)C(F)(F)C(F)(F)C(F)(F)C(F)(F)C(F)(F)C(F)(F)C(F)(F)F	1	1	370	NO
DTXSID90887327	Perfluoroeicosanoic acid	68310-12-3	OC(=O)C(F)(F)C(F)(F)C(F)(F)C(F)(F)C(F)(F)C(F)(F)C(F)(F)C(F)(F)C(F)(F)C(F)(F)C(F)(F)C(F)(F)C(F)(F)C(F)(F)C(F)(F)C(F)(F)C(F)(F)C(F)(F)C(F)(F)F	1	1	371	NO
DTXSID4065949	Perfluoro-11-methyldodecanoyl fluoride	15811-52-6	FC(=O)C(F)(F)C(F)(F)C(F)(F)C(F)(F)C(F)(F)C(F)(F)C(F)(F)C(F)(F)C(F)(F)C(F)(C(F)(F)F)C(F)(F)F	1	1	372	NO
DTXSID2066064	Perfluoro-11-(trifluoromethyl)dodecanoic acid	16486-96-7	OC(=O)C(F)(F)C(F)(F)C(F)(F)C(F)(F)C(F)(F)C(F)(F)C(F)(F)C(F)(F)C(F)(F)C(F)(C(F)(F)F)C(F)(F)F	1	1	373	NO
DTXSID7066300	Hexacosafluoro-13-(trifluoromethyl)myristic acid	18024-09-4	OC(=O)C(F)(F)C(F)(F)C(F)(F)C(F)(F)C(F)(F)C(F)(F)C(F)(F)C(F)(F)C(F)(F)C(F)(F)C(F)(F)C(F)(C(F)(F)F)C(F)(F)F	1	1	374	NO
DTXSID6070986	Perfluoro-11-methyldodecanoic acid compd. with ethanamine	68015-87-2	CC[NH3+].[O-]C(=O)C(F)(F)C(F)(F)C(F)(F)C(F)(F)C(F)(F)C(F)(F)C(F)(F)C(F)(F)C(F)(F)C(F)(C(F)(F)F)C(F)(F)F	1	1	375	NO
DTXSID4071005	Perfluoro-13-(methyl)tetradecanoyl fluoride	68025-62-7	FC(=O)C(F)(F)C(F)(F)C(F)(F)C(F)(F)C(F)(F)C(F)(F)C(F)(F)C(F)(F)C(F)(F)C(F)(F)C(F)(F)C(F)(C(F)(F)F)C(F)(F)F	1	1	376	NO
DTXSID60880027	Ammonium perfluorodecanoate	3108-42-7	[NH4+].[O-]C(=O)C(F)(F)C(F)(F)C(F)(F)C(F)(F)C(F)(F)C(F)(F)C(F)(F)C(F)(F)C(F)(F)F	1	1	377	NO
DTXSID50880197	Ammonium perfluoro-9-(methyl)decanoate	3658-63-7	[H][NH+]([H])[H].[O-]C(=O)C(F)(F)C(F)(F)C(F)(F)C(F)(F)C(F)(F)C(F)(F)C(F)(F)C(F)(C(F)(F)F)C(F)(F)F	1	1	378	NO
DTXSID40191360	Ammonium perfluorododecanoate	3793-74-6	[NH4+].[O-]C(=O)C(F)(F)C(F)(F)C(F)(F)C(F)(F)C(F)(F)C(F)(F)C(F)(F)C(F)(F)C(F)(F)C(F)(F)C(F)(F)F	1	1	379	NO
DTXSID5030030	Perfluorobutanesulfonic acid	375-73-5	OS(=O)(=O)C(F)(F)C(F)(F)C(F)(F)C(F)(F)F	1	1	380	NO
DTXSID8062600	Perfluoropentanesulfonic acid	2706-91-4	OS(=O)(=O)C(F)(F)C(F)(F)C(F)(F)C(F)(F)C(F)(F)F	1	1	381	NO
DTXSID7040150	Perfluorohexanesulfonic acid	355-46-4	OS(=O)(=O)C(F)(F)C(F)(F)C(F)(F)C(F)(F)C(F)(F)C(F)(F)F	1	1	382	NO
DTXSID8059920	Perfluoroheptanesulfonic acid	375-92-8	OS(=O)(=O)C(F)(F)C(F)(F)C(F)(F)C(F)(F)C(F)(F)C(F)(F)C(F)(F)F	1	1	383	NO
DTXSID3031864	Perfluorooctanesulfonic acid	1763-23-1	OS(=O)(=O)C(F)(F)C(F)(F)C(F)(F)C(F)(F)C(F)(F)C(F)(F)C(F)(F)C(F)(F)F	1	1	384	NO
DTXSID00874026	Ammonium 4,8-dioxa-3H-perfluorononanoate	958445-44-8	[NH4+].[O-]C(=O)C(F)(F)C(F)OC(F)(F)C(F)(F)C(F)(F)OC(F)(F)F	1	1	385	NO
DTXSID50893409	Ammonium perfluoro-3,6-dioxaoctanoate	908020-52-0	[NH4+].[O-]C(=O)C(F)(F)OC(F)(F)C(F)(F)OC(F)(F)C(F)(F)F	1	1	386	NO
DTXSID20880982	Perfluoro-3,6-dioxaoctanoic acid	80153-82-8	OC(=O)C(F)(F)OC(F)(F)C(F)(F)OC(F)(F)C(F)(F)F	1	1	387	NO
DTXSID1032646	N-Ethylperfluorooctanesulfonamide	4151-50-2	CCNS(=O)(=O)C(F)(F)C(F)(F)C(F)(F)C(F)(F)C(F)(F)C(F)(F)C(F)(F)C(F)(F)F	1	1	393	NO
DTXSID001009316	N-(Carboxymethyl)-N,N-dimethyl-3-(1H,1H,2H,2H-perfluoro-1-decanesulfonamido)propan-1-aminium	NOCAS_1009316	C[N+](C)(CCCNS(=O)(=O)CCC(F)(F)C(F)(F)C(F)(F)C(F)(F)C(F)(F)C(F)(F)C(F)(F)C(F)(F)F)CC(O)=O	1
DTXSID001009916	Sodium 8-chloroperfluoro-1-octanesulfonate	2481740-05-8	[Na+].[O-]S(=O)(=O)C(F)(F)C(F)(F)C(F)(F)C(F)(F)C(F)(F)C(F)(F)C(F)(F)C(F)(F)Cl	1
DTXSID001010222	3,5-Dichloro-2-fluoro-4-(1,1,2,3,3,3-hexafluoropropoxy)aniline	121451-05-6	NC1=C(F)C(Cl)=C(OC(F)(F)C(F)C(F)(F)F)C(Cl)=C1	1
DTXSID001015591	Perfluorotridecanedioic acid	344760-77-6	OC(=O)C(F)(F)C(F)(F)C(F)(F)C(F)(F)C(F)(F)C(F)(F)C(F)(F)C(F)(F)C(F)(F)C(F)(F)C(F)(F)C(O)=O	1
DTXSID001015696	9-Chloroperfluoro-5-methyl-3,6-dioxanonanoic acid	NOCAS_1015696	OC(=O)C(F)(F)OC(F)(F)C(F)(OC(F)(F)C(F)(F)C(F)(F)Cl)C(F)(F)F	1
DTXSID001016137	2,2,3,3,4,4,4-Heptafluorobutyl 9-octadecenoate	NOCAS_1016137	CCCCCCCC\C=C\CCCCCCCC(=O)OCC(F)(F)C(F)(F)C(F)(F)F	1
DTXSID001016256	Perfluorooctanesulfonamide lithium salt (1:1)	76752-79-9	[Li+].[NH-]S(=O)(=O)C(F)(F)C(F)(F)C(F)(F)C(F)(F)C(F)(F)C(F)(F)C(F)(F)C(F)(F)F	1
DTXSID001019143	8:2 fluorotelomer unsaturated carboxylic acid	161094-76-4	OC(=O)\C=C(/F)C(F)(F)C(F)(F)C(F)(F)C(F)(F)C(F)(F)C(F)(F)C(F)(F)F	1
DTXSID001020697	3-(((4-((1,1,2,2,3,3,4,4,5,5,6,6,7,7,8,9,9-Heptadecafluoro-8-nonen-1-yl)oxy)phenyl)sulfonyl)amino)-N,N,N-trimethyl-1-propanaminium	NOCAS_1020697	C[N+](C)(C)CCCNS(=O)(=O)C1=CC=C(OC(F)(F)C(F)(F)C(F)(F)C(F)(F)C(F)(F)C(F)(F)C(F)(F)C(F)=C(F)F)C=C1	1
DTXSID001020728	4-{[(3-chlorophenyl)methyl]amino}-2,2,3,3-tetrafluoro-4-oxobutanoic acid	883226-95-7	OC(=O)C(F)(F)C(F)(F)C(=O)NCC1=CC(Cl)=CC=C1	1
DTXSID001021471	(Perfluoroethylene)bis((perfluoromethyl)aminyl) dioxide	36525-64-1	[O-][NH+](C(F)(F)F)C(F)(F)C(F)(F)[NH+]([O-])C(F)(F)F	1
DTXSID001021540	trans-Perfluorohydrindan	75240-06-1	FC1(F)C(F)(F)[C@@]2(F)[C@](F)(C1(F)F)C(F)(F)C(F)(F)C(F)(F)C2(F)F	1
DTXSID001021590	(2Z,4Z)-1,1,1,2,3,4,5,6,6,6-Decafluoro-2,4-hexadiene	83168-65-4	F\C(\C(\F)=C(\F)C(F)(F)F)=C(/F)C(F)(F)F	1
DTXSID001021607	Perfluoro(t-butycyclohexane)	132867-98-2	FC(F)(F)C(C1C(F)(F)C(F)(F)C(F)(F)C(F)(F)C1(F)F)(C(F)(F)F)C(F)(F)F	1
DTXSID001021619	D-Galactose 6-(sodium 1-(perfluorooctyl)-3-dodecyl phosphate)	147684-10-4	[Na+].CCCCCCCCCC(CCC(F)(F)C(F)(F)C(F)(F)C(F)(F)C(F)(F)C(F)(F)C(F)(F)C(F)(F)F)OP([O-])(=O)OC[C@@H](O)[C@H](O)[C@H](O)[C@@H](O)C=O	1
DTXSID001022017	Perfluoro-2-butenesulfonic acid	2089109-39-5	OS(=O)(=O)C(F)(F)C(F)=C(F)C(F)(F)F	1
DTXSID001022067	Acetic acid, 2,2-difluoro-2-[(1,1,2,3,4,4,4-heptafluoro-2-buten-1-yl)oxy]-	2089109-62-4	OC(=O)C(F)(F)OC(F)(F)C(F)=C(F)C(F)(F)F	1
DTXSID001022112	5-(Pentafluorosulfanyl)perfluoropentyl sulfonic acid	2089109-32-8	OS(=O)(=O)C(F)(F)C(F)(F)C(F)(F)C(F)(F)C(F)(F)S(F)(F)(F)(F)F	1
DTXSID001022124	2-Hydroxy-N-(2-hydroxyethyl)-N,N-dimethyl-3-{[(perfluoropentyl)sulfonyl]amino}-1-propanaminium	2089109-05-5	C[N+](C)(CCO)CC(O)CNS(=O)(=O)C(F)(F)C(F)(F)C(F)(F)C(F)(F)C(F)(F)F	1
DTXSID001022150	1-Propanesulfonyl fluoride, 1,1,2,2,3,3-hexafluoro-3-[(1,2,2-trifluoroethenyl)oxy]-	77416-84-3	FC(F)=C(F)OC(F)(F)C(F)(F)C(F)(F)S(F)(=O)=O	1
DTXSID001022186	2,3-Bis(2-perfluorooctylethylthio)butane-1,4-diol	57216-74-7	OCC(SCCC(F)(F)C(F)(F)C(F)(F)C(F)(F)C(F)(F)C(F)(F)C(F)(F)C(F)(F)F)C(CO)SCCC(F)(F)C(F)(F)C(F)(F)C(F)(F)C(F)(F)C(F)(F)C(F)(F)C(F)(F)F	1
DTXSID001022205	Perfluoro-1-dodecanol, 1-(dihydrogen phosphate), sodium salt (1:2)	1260224-55-2	[Na+].[Na+].[O-]P([O-])(=O)OC(F)(F)C(F)(F)C(F)(F)C(F)(F)C(F)(F)C(F)(F)C(F)(F)C(F)(F)C(F)(F)C(F)(F)C(F)(F)C(F)(F)F	1
DTXSID001022243	Heptanoic acid, tridecafluoro-, [[4-(2,4-dinitrophenoxy)phenyl]methylene]hydrazide	470678-94-5	[O-][N+](=O)C1=CC(=C(OC2=CC=C(C=NNC(=O)C(F)(F)C(F)(F)C(F)(F)C(F)(F)C(F)(F)C(F)(F)F)C=C2)C=C1)[N+]([O-])=O	1
DTXSID001022255	N-(2-Hydroxyethyl)-N,N-dimethyl-3-(((tridecafluorohexyl)sulfonyl)amino)propan-1-aminium	736877-37-5	C[N+](C)(CCO)CCCNS(=O)(=O)C(F)(F)C(F)(F)C(F)(F)C(F)(F)C(F)(F)C(F)(F)F	1
DTXSID001022279	(4S,5S)-1,1,2,2,3,3,4,5-octafluorocyclopentane	158389-18-5	F[C@H]1[C@@H](F)C(F)(F)C(F)(F)C1(F)F	1
DTXSID001022336	Ethyl 2,2,3,3,4,4,4-heptafluorobutyl carbonate	1980034-03-4	CCOC(=O)OCC(F)(F)C(F)(F)C(F)(F)F	1
DTXSID001022348	2,2,3,3,4,4,5,5,5-Nonafluoro-1-phenylpentan-1-one	308-27-0	FC(F)(F)C(F)(F)C(F)(F)C(F)(F)C(=O)C1=CC=CC=C1	1
DTXSID001022455	1,1,2,2,3,3,4,4-Octafluoro-5-methoxypentane	77527-96-9	COCC(F)(F)C(F)(F)C(F)(F)C(F)F	1
DTXSID001022481	N-Benzoyl-3'-O-[(R)-(2-cyanoethoxy)(diisopropylamino)phosphino]-2'-deoxy-5'-O-{[4-(3,3,4,4,5,5,6,6,7,7,8,8,9,9,10,10,10-heptadecafluorodecyl)phenyl][bis(4-methoxyphenyl)]methyl}adenosine	865758-44-7	[H][C@@]1(C[C@]([H])(OP(OCCC#N)N(C(C)C)C(C)C)[C@@]([H])(COC(C2=CC=C(CCC(F)(F)C(F)(F)C(F)(F)C(F)(F)C(F)(F)C(F)(F)C(F)(F)C(F)(F)F)C=C2)(C2=CC=C(OC)C=C2)C2=CC=C(OC)C=C2)O1)N1C=NC2=C(NC(=O)C3=CC=CC=C3)N=CN=C12	1
DTXSID001022629	5-(2,2,3,3-Tetrafluoro-1-methylcyclobutyl)-1,3,4-thiadiazol-2-amine	1140917-25-4	CC1(CC(F)(F)C1(F)F)C1=NN=C(N)S1	1
DTXSID001022679	2,2,3,3,4,4,4-Heptafluorobutyl difluoroacetate	1365807-94-8	FC(F)C(=O)OCC(F)(F)C(F)(F)C(F)(F)F	1
DTXSID001022681	1-Bromo-2-(2,2,3,3,4,4,4-heptafluoro-butoxy)-benzene	1365808-29-2	FC(F)(F)C(F)(F)C(F)(F)COC1=CC=CC=C1Br	1
DTXSID001022700	4-(2,2,3,3-Tetrafluoropropoxy)-N-(2,2,2-trifluoroethyl)aniline	1365808-55-4	FC(F)C(F)(F)COC1=CC=C(NCC(F)(F)F)C=C1	1
DTXSID001022900	3,3,4,4,4-Pentafluorobutan-2-amine	1781334-71-1	CC(N)C(F)(F)C(F)(F)F	1
DTXSID001022936	2,3-Dichloro-1,1,3,4,4,4-hexafluorobut-1-ene	1823355-24-3	FC(F)=C(Cl)C(F)(Cl)C(F)(F)F	1
DTXSID001022998	2-Methyl-5-(pentafluoroethyl)aniline	238098-24-3	CC1=CC=C(C=C1N)C(F)(F)C(F)(F)F	1
DTXSID001023015	1,3-Bis(pentafluoroethoxy)benzene	34065-75-3	FC(F)(F)C(F)(F)OC1=CC(OC(F)(F)C(F)(F)F)=CC=C1	1
DTXSID001023039	3-(2,3,3,4,4,5,5-Heptafluorocyclopent-1-en-1-yl)-2,5-dimethylthiophene	676258-32-5	CC1=CC(=C(C)S1)C1=C(F)C(F)(F)C(F)(F)C1(F)F	1
DTXSID001023053	Propyl 2,2,3,3-tetrafluoropropyl carbonate	879496-52-3	CCCOC(=O)OCC(F)(F)C(F)F	1
DTXSID001023108	1-Bromo-3-(2,2,3,3-tetrafluoropropoxy)benzene	958452-23-8	FC(F)C(F)(F)COC1=CC=CC(Br)=C1	1
DTXSID001023146	4,7-Methanoisobenzofuran-1,3-dione, hexahydro-5-[(3,3,4,4,5,5,6,6,7,7,8,8,8-tridecafluorooctyl)thio]-, (3aα,4α,5α,7α,7aα)-	62731-90-2	[H][C@@]12[C@@H]3C[C@@H](SCCC(F)(F)C(F)(F)C(F)(F)C(F)(F)C(F)(F)C(F)(F)F)[C@@H](C3)[C@]1([H])C(=O)OC2=O	1
DTXSID001023158	Octanoic acid, 2,2,3,3,4,4,5,5,6,6,7,7,8,8,8-pentadecafluoro-, compd. with ethanamine (1:1)	1376936-03-6	CCN.OC(=O)C(F)(F)C(F)(F)C(F)(F)C(F)(F)C(F)(F)C(F)(F)C(F)(F)F	1
DTXSID001023160	1-Propanol, 2,3-bis[(3,3,4,4,5,5,6,6,7,7,8,8,8-tridecafluorooctyl)thio]-	64493-46-5	OCC(CSCCC(F)(F)C(F)(F)C(F)(F)C(F)(F)C(F)(F)C(F)(F)F)SCCC(F)(F)C(F)(F)C(F)(F)C(F)(F)C(F)(F)C(F)(F)F	1
DTXSID001023172	4,4,5,5,5-Pentafluoro-N-methoxy-N-methylpentanamide	1350856-28-8	CON(C)C(=O)CCC(F)(F)C(F)(F)F	1
DTXSID001023184	1-((1,2-Difluoro-2-(heptafluoropropoxy)vinyl)oxy)-1,1,2,2,3,3,3-heptafluoropropane	145151-18-4	FC(OC(F)(F)C(F)(F)C(F)(F)F)=C(F)OC(F)(F)C(F)(F)C(F)(F)F	1
DTXSID001023203	[4-(2,2,3,3-Tetrafluoropropoxy)phenyl]hydrazine	175691-03-9	NNC1=CC=C(OCC(F)(F)C(F)F)C=C1	1
DTXSID001023277	1-(2-Ethoxy-3,3,4,4-tetrafluorocyclobut-1-en-1-yl)ethan-1-one	155689-27-3	CCOC1=C(C(C)=O)C(F)(F)C1(F)F	1
DTXSID001023310	(1E)-4,4,5,5,5-Pentafluoro-1-phenyl-1-[(propan-2-yl)amino]pent-1-en-3-one	484009-71-4	CC(C)N\C(=C\C(=O)C(F)(F)C(F)(F)F)C1=CC=CC=C1	1
DTXSID001023322	2-Methylpropyl ethyl(heptafluoropropyl)phosphinate	77529-59-0	CCP(=O)(OCC(C)C)C(F)(F)C(F)(F)C(F)(F)F	1
DTXSID001023396	3,3,4,4,5,5,6,6,7,7,8,8,9,9,10,10,10-Heptadecafluorodecyl [2-(sulfothio)ethyl]carbamate	761340-40-3	OS(=O)(=O)SCCNC(=O)OCCC(F)(F)C(F)(F)C(F)(F)C(F)(F)C(F)(F)C(F)(F)C(F)(F)C(F)(F)F	1
DTXSID001023627	Perfluoro(3-{[1-(ethenyloxy)propan-2-yl]oxy}propane-1-sulfonyl) fluoride	77545-07-4	FC(F)=C(F)OC(F)(F)C(F)(OC(F)(F)C(F)(F)C(F)(F)S(F)(=O)=O)C(F)(F)F	1
DTXSID001023677	Propanoic acid, 2,3,3,3-tetrafluoro-2-(1,1,2,2-tetrafluoro-3-iodopropoxy)-, sodium salt	106394-04-1	[Na+].[O-]C(=O)C(F)(OC(F)(F)C(F)(F)CI)C(F)(F)F	1
DTXSID001023689	Perfluoro-3,7,11-trioxatetradecane	122076-00-0	FC(F)(F)C(F)(F)OC(F)(F)C(F)(F)C(F)(F)OC(F)(F)C(F)(F)C(F)(F)OC(F)(F)C(F)(F)C(F)(F)F	1
DTXSID001023760	1-Propanol, 2,3,3,3-tetrafluoro-2-(1,1,2,2,3,3,3-heptafluoropropoxy)-, 1-(dihydrogen phosphate)	1173199-13-7	OP(O)(=O)OCC(F)(OC(F)(F)C(F)(F)C(F)(F)F)C(F)(F)F	1
DTXSID001023772	Phosphonic acid, P -[3,5,5,6,8,8,9,11,11,12,14,14,15,17,17,18,18,19,19,19-eicosafluoro-3,6,9,12,15-pentakis(trifluoromethyl)-4,7,10,13,16- pentaoxanonadec-1-yl]-, diethyl ester	1198297-66-3	CCOP(=O)(CCC(F)(OC(F)(F)C(F)(OC(F)(F)C(F)(OC(F)(F)C(F)(OC(F)(F)C(F)(OC(F)(F)C(F)(F)C(F)(F)F)C(F)(F)F)C(F)(F)F)C(F)(F)F)C(F)(F)F)C(F)(F)F)OCC	1
DTXSID001023784	Perfluoro-2-methyl-2-(pentyloxy)pentane	93200-92-1	FC(F)(F)C(F)(F)C(F)(F)C(F)(F)C(F)(F)OC(C(F)(F)F)(C(F)(F)F)C(F)(F)C(F)(F)C(F)(F)F	1
DTXSID001026502	2,2'-(((Nonafluorobutyl)sulfonyl)imino)diacetic acid	1268835-43-3	OC(=O)CN(CC(O)=O)S(=O)(=O)C(F)(F)C(F)(F)C(F)(F)C(F)(F)F	1
DTXSID001026526	3-(Dimethyl(3-(((tridecafluorohexyl)sulfonyl)amino)propyl)azaniumyl)-2-hydroxypropane-1-sulfonate	2103241-09-2	C[N+](C)(CCCNS(=O)(=O)C(F)(F)C(F)(F)C(F)(F)C(F)(F)C(F)(F)C(F)(F)F)CC(O)CS([O-])(=O)=O	1
DTXSID001026588	(2Z)‐4,4,5,5,6,6,7,7,8,8,9,9,10,10,10‐Pentadecafluorodec‐2‐enoic acid	173441-56-0	OC(=O)\C=C/C(F)(F)C(F)(F)C(F)(F)C(F)(F)C(F)(F)C(F)(F)C(F)(F)F	1
DTXSID001026645	1,1,2,2,3,3,4,4,5,5,6,6,7,7,7-Pentadecafluoro-N-(2-hydroxyethyl)heptane-1-sulfonamide	167398-54-1	OCCNS(=O)(=O)C(F)(F)C(F)(F)C(F)(F)C(F)(F)C(F)(F)C(F)(F)C(F)(F)F	1
DTXSID001026657	2-(1,1,2,2,3,3,4,4,5,5,5-Undecafluoropentylsulfonylamino)acetic acid	647-43-8	OC(=O)CNS(=O)(=O)C(F)(F)C(F)(F)C(F)(F)C(F)(F)C(F)(F)F	1
DTXSID001026671	3,3,4,4,4-Pentafluorobutyl	1033556-26-1	[CH2]CC(F)(F)C(F)(F)F	1
DTXSID001026683	3,3,4,4,5,5,6,6,7,7,8,8,9,9,10,10-Hexadecafluorododecane-1,12-diol	NOCAS_1026683	OCCC(F)(F)C(F)(F)C(F)(F)C(F)(F)C(F)(F)C(F)(F)C(F)(F)C(F)(F)CCO	1
DTXSID001026695	1,1,2,3,4,4,5,5,5-Nonafluoropent-2-ene	935476-71-4	FC(F)C(F)=C(F)C(F)(F)C(F)(F)F	1
DTXSID001026702	1,1,2,2,3,3-Hexafluorobutane-1-sulfonic acid	NOCAS_1026702	CC(F)(F)C(F)(F)C(F)(F)S(O)(=O)=O	1
DTXSID001026714	1,1,1,5,5,6,6,6-Octafluoro-4,4-bis(trifluoromethyl)hex-2-ene	NOCAS_1026714	FC(F)(F)C=CC(C(F)(F)F)(C(F)(F)F)C(F)(F)C(F)(F)F	1
DTXSID001026726	2,2,3,5,5,6-Hexafluoro-3,6-bis(trifluoromethyl)-1,4-dioxane	137373-27-4	FC(F)(F)C1(F)OC(F)(F)C(F)(OC1(F)F)C(F)(F)F	1
DTXSID001026740	3-[3-(5-Bromo-2-fluorophenoxy)-N-[[3-(1,1,2,2,3,3,3-heptafluoropropyl)phenyl]methyl]anilino]-1,1,1-trifluoropropan-2-ol	NOCAS_1026740	OC(CN(CC1=CC(=CC=C1)C(F)(F)C(F)(F)C(F)(F)F)C1=CC(OC2=C(F)C=CC(Br)=C2)=CC=C1)C(F)(F)F	1
DTXSID001026752	4-Bromo-5-(1,2,3,3,4,4,5,5,6,6,6-undecafluorohex-1-enoxy)benzene-1,2-diamine	NOCAS_1026752	NC1=C(N)C=C(OC(F)=C(F)C(F)(F)C(F)(F)C(F)(F)C(F)(F)F)C(Br)=C1	1
DTXSID001026764	1,2-Bis(2-methyl-5-phenyl-3-thienyl)perfluorocyclopentene	182003-69-6	CC1=C(C=C(S1)C1=CC=CC=C1)C1=C(C2=C(C)SC(=C2)C2=CC=CC=C2)C(F)(F)C(F)(F)C1(F)F	1
DTXSID001026776	N-[2-Bromo-4-(1,1,1,2,3,3,3-heptafluoropropan-2-yl)-6-(trifluoromethyl)phenyl]-2-fluoro-3-nitrobenzamide	NOCAS_1026776	[O-][N+](=O)C1=CC=CC(C(=O)NC2=C(C=C(C=C2Br)C(F)(C(F)(F)F)C(F)(F)F)C(F)(F)F)=C1F	1
DTXSID001026788	1,1,1,2,2,3,3,4,4,5,5,6,6-Tridecafluoro-9-[tri(propan-2-yloxy)methyl]heptadecane	NOCAS_1026788	CCCCCCCCC(CCC(F)(F)C(F)(F)C(F)(F)C(F)(F)C(F)(F)C(F)(F)F)C(OC(C)C)(OC(C)C)OC(C)C	1
DTXSID001026790	N-[2-Bromo-4-(1,1,1,2,3,3,3-heptafluoropropan-2-yl)-6-(trifluoromethyl)phenyl]-4-fluoro-3-nitrobenzamide	NOCAS_1026790	[O-][N+](=O)C1=C(F)C=CC(=C1)C(=O)NC1=C(C=C(C=C1Br)C(F)(C(F)(F)F)C(F)(F)F)C(F)(F)F	1
DTXSID001026807	1,1,2,2,3,9,9,9‐Octafluorononane‐1‐sulfonate	NOCAS_1026807	[O-]S(=O)(=O)C(F)(F)C(F)(F)C(F)CCCCCC(F)(F)F	1
DTXSID001026819	1,1,2,2,3,3,4,7,7,7‐Decafluoroheptane‐1‐sulfonate	NOCAS_1026819	[O-]S(=O)(=O)C(F)(F)C(F)(F)C(F)(F)C(F)CCC(F)(F)F	1
DTXSID001026821	1,1,1,2,3,3,4,4-Octafluoro-4-propoxy-2-(trifluoromethyl)butane	NOCAS_1026821	CCCOC(F)(F)C(F)(F)C(F)(C(F)(F)F)C(F)(F)F	1
DTXSID001026833	2,3,3,4,4-Pentafluorothiolane 1,1-dioxide	NOCAS_1026833	FC1C(F)(F)C(F)(F)CS1(=O)=O	1
DTXSID001026845	1,1,1,2,2,3,3-Heptafluoro-3-methylsulfanylpropane	NOCAS_1026845	CSC(F)(F)C(F)(F)C(F)(F)F	1
DTXSID001026857	3,3,4,4,5,5,6,6,7,7,8,8,9,9,10,10-Hexadecafluorodecyl 2-methylprop-2-enoate	NOCAS_1026857	CC(=C)C(=O)OCCC(F)(F)C(F)(F)C(F)(F)C(F)(F)C(F)(F)C(F)(F)C(F)(F)C(F)F	1
DTXSID001026871	4-Fluoro-N-[4-(1,1,1,2,3,3,3-heptafluoropropan-2-yl)-2,6-dimethylphenyl]-3-nitrobenzamide	NOCAS_1026871	CC1=CC(=CC(C)=C1NC(=O)C1=CC(=C(F)C=C1)[N+]([O-])=O)C(F)(C(F)(F)F)C(F)(F)F	1
DTXSID001026883	3,3,4,4,4-Pentafluorobutyl thioacetate	NOCAS_1026883	CC(=S)OCCC(F)(F)C(F)(F)F	1
DTXSID001026895	[4-[(E)-3-[2-(2,4-Dinitrophenyl)ethoxy]-3-oxoprop-1-enyl]phenyl] 4-(4,4,5,5,5-pentafluoropentoxy)benzoate	NOCAS_1026895	[O-][N+](=O)C1=CC(=C(CCOC(=O)\C=C\C2=CC=C(OC(=O)C3=CC=C(OCCCC(F)(F)C(F)(F)F)C=C3)C=C2)C=C1)[N+]([O-])=O	1
DTXSID001026902	2-Chloro-5-[4-[4-(1,1,1,2,3,3,3-heptafluoropropan-2-yl)-2,6-dimethylphenyl]pyrazol-1-yl]pyridine-3-carboxylic acid	NOCAS_1026902	CC1=CC(=CC(C)=C1C1=CN(N=C1)C1=CC(C(O)=O)=C(Cl)N=C1)C(F)(C(F)(F)F)C(F)(F)F	1
DTXSID001026914	4-Bromo-5-(1,2,3,3,4,4,5,5,6,6,6-undecafluorohex-1-enoxy)phthalic acid	NOCAS_1026914	OC(=O)C1=CC(Br)=C(OC(F)=C(F)C(F)(F)C(F)(F)C(F)(F)C(F)(F)F)C=C1C(O)=O	1
DTXSID001026926	1-Ethenoxy-1,1,2,2,5,5,5-heptafluoropentane	NOCAS_1026926	FC(F)(F)CCC(F)(F)C(F)(F)OC=C	1
DTXSID001026938	2-Bromo-1-chloro-5-(1,1,1,2,3,3,3-heptafluoropropan-2-yl)-3-(trifluoromethoxy)benzene	NOCAS_1026938	FC(F)(F)OC1=C(Br)C(Cl)=CC(=C1)C(F)(C(F)(F)F)C(F)(F)F	1
DTXSID001026964	Methyl 2,3,3,3-tetrafluoro-2-(fluoromethyl)propanoate	NOCAS_1026964	COC(=O)C(F)(CF)C(F)(F)F	1
DTXSID001026976	4-(1,1,2,2,3,3,4,4,5,5,6,6,7,7,8,8,8-Heptadecafluorooctylsulfonyloxy)butyl 1,1,2,2,3,3,4,4,5,5,6,6,7,7,8,8,8-heptadecafluorooctane-1-sulfonate	NOCAS_1026976	FC(F)(F)C(F)(F)C(F)(F)C(F)(F)C(F)(F)C(F)(F)C(F)(F)C(F)(F)S(=O)(=O)OCCCCOS(=O)(=O)C(F)(F)C(F)(F)C(F)(F)C(F)(F)C(F)(F)C(F)(F)C(F)(F)C(F)(F)F	1
DTXSID001026990	Nonafluorobutylphosphonous difluoride	127223-44-3	FP(F)C(F)(F)C(F)(F)C(F)(F)C(F)(F)F	1
DTXSID001027005	2-Chloro-N-[4-(1,1,1,2,3,3,3-heptafluoropropan-2-yl)-2,6-dimethylphenyl]-3-nitrobenzamide	NOCAS_1027005	CC1=CC(=CC(C)=C1NC(=O)C1=C(Cl)C(=CC=C1)[N+]([O-])=O)C(F)(C(F)(F)F)C(F)(F)F	1
DTXSID001027029	1,4,5,5,6,6-Hexafluorocyclohex-2-ene-1-carboxylate	NOCAS_1027029	[O-]C(=O)C1(F)C=CC(F)C(F)(F)C1(F)F	1
DTXSID001027031	1-Ethylsulfonyl-1,1,2,2,3,3,3-heptafluoropropane	NOCAS_1027031	CCS(=O)(=O)C(F)(F)C(F)(F)C(F)(F)F	1
DTXSID001027043	2,3,3-Trifluoro-2-(trifluoromethyl)-1,4-dioxane	NOCAS_1027043	FC(F)(F)C1(F)OCCOC1(F)F	1
DTXSID001027079	2-Chloro-N-[3-[[2-iodo-4-(1,1,1,2,3,3,4,4,4-nonafluorobutan-2-yl)-6-(trifluoromethyl)phenyl]carbamoyl]phenyl]-N-methylpyridine-3-carboxamide	NOCAS_1027079	CN(C(=O)C1=C(Cl)N=CC=C1)C1=CC=CC(=C1)C(=O)NC1=C(C=C(C=C1I)C(F)(C(F)(F)F)C(F)(F)C(F)(F)F)C(F)(F)F	1
DTXSID001027081	2-[2-[2-[4-(2,2,3,3,3-Pentafluoropropoxy)phenyl]ethynyl]-3H-benzimidazol-5-yl]benzenesulfonamide	NOCAS_1027081	NS(=O)(=O)C1=CC=CC=C1C1=CC2=C(C=C1)N=C(N2)C#CC1=CC=C(OCC(F)(F)C(F)(F)F)C=C1	1
DTXSID001027093	Dioxido(1,1,2,2,2-pentafluoroethoxy)borane	NOCAS_1027093	[O-]B([O-])OC(F)(F)C(F)(F)F	1
DTXSID001027100	1-Ethenyl-4-(1,1,2,2,2-pentafluoroethoxy)benzene	NOCAS_1027100	FC(F)(F)C(F)(F)OC1=CC=C(C=C)C=C1	1
DTXSID001027279	1,2,2,2-Tetrafluoroethyl formate	481631-19-0	FC(OC=O)C(F)(F)F	1
DTXSID001027281	(1Z)-1,2,3,3,3-Pentafluoro-1-propene	5528-43-8	F\C=C(/F)C(F)(F)F	1
DTXSID001027598	Perfluoromethylpropyl-(methylcyclopentyl)-amine	444658-71-3	FC(F)(F)N(C(F)(F)C(F)(F)C(F)(F)F)C1(F)C(F)(F)C(F)(F)C(F)(F)C1(F)C(F)(F)F	1
DTXSID001027655	5,5,6,6,7,7,8,8,9,9,10,10,11,11,12,12,12-Heptadecafluoro-4-oxododecyl prop-2-enoate	NOCAS_1027655	FC(F)(F)C(F)(F)C(F)(F)C(F)(F)C(F)(F)C(F)(F)C(F)(F)C(F)(F)C(=O)CCCOC(=O)C=C	1
DTXSID001027667	Potassium perfluorodecanoate	51604-85-4	[K+].[O-]C(=O)C(F)(F)C(F)(F)C(F)(F)C(F)(F)C(F)(F)C(F)(F)C(F)(F)C(F)(F)C(F)(F)F	1
DTXSID001027679	Chromium chloride-perfluorooctanoic acid complex	55801-89-3	[OH-].FC(F)(F)C(F)(F)C(F)(F)C(F)(F)C(F)(F)C(F)(F)C(F)(F)C(\O[Cr+](Cl)Cl)=[O+]\[Cr-](Cl)Cl	1
DTXSID001028089	Perfluoro[1,2-13C2]dodecanoic acid	NOCAS_1028089	O[13C](=O)[13C](F)(F)C(F)(F)C(F)(F)C(F)(F)C(F)(F)C(F)(F)C(F)(F)C(F)(F)C(F)(F)C(F)(F)C(F)(F)F	1
DTXSID001032232	6-(Perfluoromethoxy)perfluorohexane sulfonic acid	NOCAS_1032232	OS(=O)(=O)C(F)(F)C(F)(F)C(F)(F)C(F)(F)C(F)(F)C(F)(F)OC(F)(F)F	1
DTXSID001032282	(E)-Perfluoroundec-9-ene-1-sulfonic acid	NOCAS_1032282	OS(=O)(=O)C(F)(F)C(F)(F)C(F)(F)C(F)(F)C(F)(F)C(F)(F)C(F)(F)C(F)(F)C(\F)=C(/F)C(F)(F)F	1
DTXSID001032313	10:2 fluorotelomer sulfinyl propanamido dimethyl ethyl sulfonate	NOCAS_1032313	CC(C)(CS([O-])(=O)=O)NC(=O)CCS(=O)CCC(F)(F)C(F)(F)C(F)(F)C(F)(F)C(F)(F)C(F)(F)C(F)(F)C(F)(F)C(F)(F)C(F)(F)F	1
DTXSID001032337	3-(Perfluoropropanesulfonamido)-N,N,N-trimethylpropan-1-aminium	1966131-51-0	C[N+](C)(C)CCCNS(=O)(=O)C(F)(F)C(F)(F)C(F)(F)F	1
DTXSID001032351	N,N-Dimethyl-N-(3-sulfopropyl)-3-[[(perfluorohexyl)sulfonyl]amino]-1-propanaminium	2089108-68-7	C[N+](C)(CCCNS(=O)(=O)C(F)(F)C(F)(F)C(F)(F)C(F)(F)C(F)(F)C(F)(F)F)CCCS(O)(=O)=O	1
DTXSID001032418	Perfluoro-2-(propoxy)ethanesulfinic acid, sodium salt (1:1)	1151494-33-5	[Na+].[O-]S(=O)C(F)(F)C(F)(F)OC(F)(F)C(F)(F)C(F)(F)F	1
DTXSID001032432	Lithium perfluoropentane sulfonate	1046864-81-6	[Li+].[O-]S(=O)(=O)C(F)(F)C(F)(F)C(F)(F)C(F)(F)C(F)(F)F	1
DTXSID001032456	4-(Perfluorobutyl)-3,3-difluorobutanol 1-(dihydrogen phosphate) ammonium salt (1:2)	1025044-20-5	[NH4+].[NH4+].[O-]P([O-])(=O)CCC(F)(F)CC(F)(F)C(F)(F)C(F)(F)C(F)(F)F	1
DTXSID001032468	N,N′-[Phosphinicobis(oxy-2,1-ethanediyl)]bis[N-ethyl-perfluoro-1-hexanesulfonamide] ammonium salt	118337-75-0	[NH4+].CCN(CCOP([O-])(=O)OCCN(CC)S(=O)(=O)C(F)(F)C(F)(F)C(F)(F)C(F)(F)C(F)(F)C(F)(F)F)S(=O)(=O)C(F)(F)C(F)(F)C(F)(F)C(F)(F)C(F)(F)C(F)(F)F	1
DTXSID001032470	N-(2-Hydroxyethyl)-N-methyl-N-(3-sulfopropyl)-3-[[(perfluoropentyl)sulfonyl]amino]-1-propanaminium	2089108-75-6	C[N+](CCO)(CCCNS(=O)(=O)C(F)(F)C(F)(F)C(F)(F)C(F)(F)C(F)(F)F)CCCS(O)(=O)=O	1
DTXSID001032482	N,N-Bis(2,3-dihydroxypropyl)-perfluoro-1-hexanesulfonamide	118675-71-1	OCC(O)CN(CC(O)CO)S(=O)(=O)C(F)(F)C(F)(F)C(F)(F)C(F)(F)C(F)(F)C(F)(F)F	1
DTXSID001032494	N-(2,3-Dihydroxypropyl)-4-hydroxy-N,N-dimethyl-3-{[(perfluoropentyl)sulfonyl]amino}-1-butanaminium	2089108-85-8	C[N+](C)(CCC(CO)NS(=O)(=O)C(F)(F)C(F)(F)C(F)(F)C(F)(F)C(F)(F)F)CC(O)CO	1
DTXSID001032501	5-(Perfluoroheptyl)pentanamine hydrochloride (1:1)	121912-24-1	Cl.NCCCCCC(F)(F)C(F)(F)C(F)(F)C(F)(F)C(F)(F)C(F)(F)C(F)(F)F	1
DTXSID001032537	2-Hydroxy-N-(2-hydroxyethyl)-N,N-dimethyl-3-{[(perfluorobutyl)sulfonyl]amino}-1-propanaminium	2089109-04-4	C[N+](C)(CCO)CC(O)CNS(=O)(=O)C(F)(F)C(F)(F)C(F)(F)C(F)(F)F	1
DTXSID001032549	3-[[(Perfluoroheptyl)sulfonyl]methylamino]-N,N,N-trimethyl-1-propanaminium	2089109-13-5	C[N+](C)(C)CCCNCS(=O)(=O)C(F)(F)C(F)(F)C(F)(F)C(F)(F)C(F)(F)C(F)(F)C(F)(F)F	1
DTXSID001032599	Perfluoro-11-tridecene-1-sulfonic acid	2089109-48-6	OS(=O)(=O)C(F)(F)C(F)(F)C(F)(F)C(F)(F)C(F)(F)C(F)(F)C(F)(F)C(F)(F)C(F)(F)C(F)(F)C(F)=C(F)C(F)(F)F	1
DTXSID001032606	11:2 Fluorotelomer carboxylic acid	1270180-21-6	OC(=O)CC(F)(F)C(F)(F)C(F)(F)C(F)(F)C(F)(F)C(F)(F)C(F)(F)C(F)(F)C(F)(F)C(F)(F)C(F)(F)F	1
DTXSID001032620	N-(2-Hydroxyethyl)-N,N-dimethyl-3-[(2-hydroxy-3-sulfopropyl)[(perfluorobutyl)sulfonyl]amino]-1-propanaminium, inner salt	2089109-66-8	C[N+](C)(CCO)CCCN(CC(O)CS(O)(=O)=O)S(=O)(=O)C(F)(F)C(F)(F)C(F)(F)C(F)(F)F	1
DTXSID001032644	Ethyl perfluoroheptyl ether	233678-19-8	CCOC(F)(F)C(F)(F)C(F)(F)C(F)(F)C(F)(F)C(F)(F)C(F)(F)F	1
DTXSID001032656	Methoxydimethyl(3,3,4,4,4-pentafluorobutyl)silane	252653-06-8	CO[Si](C)(C)CCC(F)(F)C(F)(F)F	1
DTXSID001032701	Perfluoroheptane sulfonic anhydride	140429-92-1	FC(F)(F)C(F)(F)C(F)(F)C(F)(F)C(F)(F)C(F)(F)C(F)(F)S(=O)(=O)OS(=O)(=O)C(F)(F)C(F)(F)C(F)(F)C(F)(F)C(F)(F)C(F)(F)C(F)(F)F	1
DTXSID001032749	1-((Perfluoro[3-[1-methylethoxy]propyl])ethyl)pyridinium chloride	144930-59-6	[Cl-].FC(F)(F)C(F)(OC(F)(F)C(F)(F)C(F)(F)CC[N+]1=CC=CC=C1)C(F)(F)F	1
DTXSID001032799	N-[3-(Dimethylamino)propyl]-2-[(perfluorobutyl)ethylthio]acetamide	1513863-89-2	CN(C)CCCNC(=O)CSCCC(F)(F)C(F)(F)C(F)(F)C(F)(F)F	1
DTXSID001032806	N-[3-(Dimethylamino)propyl]-2-[(perfluorododecyl)ethylthio]acetamide	1513863-93-8	CN(C)CCCNC(=O)CSCCC(F)(F)C(F)(F)C(F)(F)C(F)(F)C(F)(F)C(F)(F)C(F)(F)C(F)(F)C(F)(F)C(F)(F)C(F)(F)C(F)(F)F	1
DTXSID001032818	N,N,N-Trimethyl-3-[[2-[(perfluorohexyl)ethylsulfinyl]acetyl]amino]-1-propanaminium	1513864-03-3	C[N+](C)(C)CCCNC(=O)CS(=O)CCC(F)(F)C(F)(F)C(F)(F)C(F)(F)C(F)(F)C(F)(F)F	1
DTXSID001032820	2-[[3-[(Perfluorobutyl)ethylsulfinyl]-1-oxopropyl]amino]-2-methyl-1-propanesulfonic acid	1513864-09-9	CC(C)(CS(O)(=O)=O)NC(=O)CCS(=O)CCC(F)(F)C(F)(F)C(F)(F)C(F)(F)F	1
DTXSID001032844	3-[[(Perfluorooctyl)sulfonyl]amino]-N,N,N-trimethyl-1-propanaminium methanesulfonate	153163-64-5	CS([O-])(=O)=O.C[N+](C)(C)CCCNS(=O)(=O)C(F)(F)C(F)(F)C(F)(F)C(F)(F)C(F)(F)C(F)(F)C(F)(F)C(F)(F)F	1
DTXSID001032868	N-Ethyl-N-[3-(trimethoxysilyl)propyl]perfluoro-1-butanesulfonamide	154380-33-3	F.CCN(CCC[Si](OC)(OC)OC)S(=O)(=O)C(F)(F)C(F)(F)C(F)(F)C(F)(F)F	1
DTXSID001032870	2,2-Difluoro-2-[1,1,2,2-tetrafluoro-2-(perfluoroethoxy)ethoxy]-N-[3-(trimethoxysilyl)propyl]acetamide	154380-35-5	CO[Si](CCCNC(=O)C(F)(F)OC(F)(F)C(F)(F)OC(F)(F)C(F)(F)F)(OC)OC	1
DTXSID001032882	3‐[N‐(3‐{[2‐(2‐Hydroxyethoxy)ethyl]dimethylazaniumyl}propyl)perfluorohexanesulfonamido]propane‐1‐sulfonate	38850-57-6	C[N+](C)(CCCN(CCCS([O-])(=O)=O)S(=O)(=O)C(F)(F)C(F)(F)C(F)(F)C(F)(F)C(F)(F)C(F)(F)F)CCOCCO	1
DTXSID001032913	Ethyl perfluoroundecanoate	41506-11-0	CCOC(=O)C(F)(F)C(F)(F)C(F)(F)C(F)(F)C(F)(F)C(F)(F)C(F)(F)C(F)(F)C(F)(F)C(F)(F)F	1
DTXSID001032925	(Perfluorohexyl)ethyl (perfluorododecyl)ethyl hydrogen phosphate	1578186-69-2	OP(=O)(OCCC(F)(F)C(F)(F)C(F)(F)C(F)(F)C(F)(F)C(F)(F)F)OCCC(F)(F)C(F)(F)C(F)(F)C(F)(F)C(F)(F)C(F)(F)C(F)(F)C(F)(F)C(F)(F)C(F)(F)C(F)(F)C(F)(F)F	1
DTXSID001032963	Bis(perfluoro-1-methyl-ethoxyethyl) phosphinic acid	500776-74-9	OP(=O)(C(F)(F)C(F)(F)OC(F)(C(F)(F)F)C(F)(F)F)C(F)(F)C(F)(F)OC(F)(C(F)(F)F)C(F)(F)F	1
DTXSID001032975	3-[[(Perfluorooctyl)sulfonyl]amino]-N,N-dimethyl-N-propyl-1-propanaminium bromide	163973-44-2	[Br-].CCC[N+](C)(C)CCCNS(=O)(=O)C(F)(F)C(F)(F)C(F)(F)C(F)(F)C(F)(F)C(F)(F)C(F)(F)C(F)(F)F	1
DTXSID001032987	3-[[(Perfluorooctyl)sulfonyl]amino]-N,N-dimethyl-N-propyl-1-propanaminium 4-methylbenzenesulfonate (1:1)	167162-27-8	CC1=CC=C(C=C1)S([O-])(=O)=O.CCC[N+](C)(C)CCCNS(=O)(=O)C(F)(F)C(F)(F)C(F)(F)C(F)(F)C(F)(F)C(F)(F)C(F)(F)C(F)(F)F	1
DTXSID001032999	P,P-Bis(perfluoro-7-methyloctyl) phosphinothioic acid ytterbium(3+) salt (3:1)	500776-90-9	[Yb+3].[O-]P(=S)(C(F)(F)C(F)(F)C(F)(F)C(F)(F)C(F)(F)C(F)(F)C(F)(C(F)(F)F)C(F)(F)F)C(F)(F)C(F)(F)C(F)(F)C(F)(F)C(F)(F)C(F)(F)C(F)(C(F)(F)F)C(F)(F)F	1
DTXSID001033004	Perfluoro(decyl)(octyl) phosphinic acid ytterbium(3+) salt	500776-94-3	[Yb+3].[O-]P(=O)(C(F)(F)C(F)(F)C(F)(F)C(F)(F)C(F)(F)C(F)(F)C(F)(F)C(F)(F)F)C(F)(F)C(F)(F)C(F)(F)C(F)(F)C(F)(F)C(F)(F)C(F)(F)C(F)(F)C(F)(F)C(F)(F)F	1
DTXSID001033016	30,30,31,31,31-Pentafluoro-29-(1,1,2,2,2-pentafluoroethyl)-27,28,29-tris(trifluoromethyl)-2,5,8,11,14,17,20,23,26-nonaoxahentriacont-27-ene	53410-45-0	COCCOCCOCCOCCOCCOCCOCCOCCOC(=C(C(F)(F)F)C(C(F)(F)F)(C(F)(F)C(F)(F)F)C(F)(F)C(F)(F)F)C(F)(F)F	1
DTXSID001033028	N-[3-[[(Perfluorooctyl)sulfonyl]amino]propyl]-N,N-dimethylhexanaminium bromide	53518-01-7	[Br-].CCCCCC[N+](C)(C)CCCNS(=O)(=O)C(F)(F)C(F)(F)C(F)(F)C(F)(F)C(F)(F)C(F)(F)C(F)(F)C(F)(F)F	1
DTXSID001033030	N,N,N-Trimethyl-3-[(perfluoro-1-oxopropyl)amino]propanaminium iodide	53518-03-9	[I-].C[N+](C)(C)CCCNC(=O)C(F)(F)C(F)(F)F	1
DTXSID001033042	2-Hydroxy-N,N-dimethyl-3-sulfo-N-[3-[[(perfluoroheptyl)sulfonyl]amino]propyl]-1-propanaminium	NOCAS_1033042	C[N+](C)(CCCNS(=O)(=O)C(F)(F)C(F)(F)C(F)(F)C(F)(F)C(F)(F)C(F)(F)C(F)(F)F)CC(O)CS(O)(=O)=O	1
DTXSID001033054	1,4-Bis(perfluoroethyl)butane	1835251-87-0	FC(F)(F)C(F)(F)CCCCC(F)(F)C(F)(F)F	1
DTXSID001033066	Perfluoro-1-butanesulfinic acid ammonium	187480-45-1	[NH4+].[O-]S(=O)C(F)(F)C(F)(F)C(F)(F)C(F)(F)F	1
DTXSID001033078	Tetramethylammonium perfluorohexane sulfonate	189274-31-5	C[N+](C)(C)C.[O-]S(=O)(=O)C(F)(F)C(F)(F)C(F)(F)C(F)(F)C(F)(F)C(F)(F)F	1
DTXSID001033080	Perfluoro-1-[2-[1-[(methoxy)methyl]-ethoxy]-1-(methyl)ethoxy]-2-propanone	18934-99-1	FC(F)(F)OC(F)(F)C(F)(OC(F)(F)C(F)(OC(F)(F)C(=O)C(F)(F)F)C(F)(F)F)C(F)(F)F	1
DTXSID001033092	3-[[(Perfluoropropyl)sulfonyl]amino]-N,N,N-trimethyl-1-propanaminium iodide	1966131-52-1	[I-].C[N+](C)(C)CCCNS(=O)(=O)C(F)(F)C(F)(F)C(F)(F)F	1
DTXSID001033109	N,N-dimethyl-2-[(perfluorododecanoyl)amino]ethan-1-amine N-oxide	200636-70-0	C[N+](C)([O-])CCNC(=O)C(F)(F)C(F)(F)C(F)(F)C(F)(F)C(F)(F)C(F)(F)C(F)(F)C(F)(F)C(F)(F)C(F)(F)C(F)(F)F	1
DTXSID001033111	Chloro(3,3,4,4,5,5,5-heptafluoropentyl)bis(3,3,3-trifluoropropyl)silane	608296-81-7	FC(F)(F)CC[Si](Cl)(CCC(F)(F)F)CCC(F)(F)C(F)(F)C(F)(F)F	1
DTXSID001033123	Diethylmethoxy(3,3,4,4,5,5,6,6,6-nonafluorohexyl)silane	608299-39-4	CC[Si](CC)(CCC(F)(F)C(F)(F)C(F)(F)C(F)(F)F)OC	1
DTXSID001033135	N-[3-(Dimethylamino)propyl]perfluoro-3,4,5-tris(methoxy)cyclohexanecarboxamide N-oxide	200636-93-7	C[N+](C)([O-])CCCNC(=O)C1(F)C(F)(F)C(OC(F)(F)F)C(F)(OC(F)(F)F)C(F)(OC(F)(F)F)C1(F)F	1
DTXSID001033147	N-ethyl-2-[[[[3-[[[[3-[[[[3-[[[2-[ethyl[(perfluorooctyl)sulfonyl]amino]ethoxy]carbonyl]amino]methylphenyl]amino]carbonyl]amino]methylphenyl]amino]carbonyl]amino]methylphenyl]amino]carbonyl]oxy]-N,N-dimethylethanaminium	100066-53-3	CCOS([O-])(=O)=O.CCN(CCOC(=O)NCC1=CC=CC(NC(=O)NCC2=CC=CC(NC(=O)NCC3=CC=CC(NC(=O)OCC[N+](C)(C)CC)=C3)=C2)=C1)S(=O)(=O)C(F)(F)C(F)(F)C(F)(F)C(F)(F)C(F)(F)C(F)(F)C(F)(F)C(F)(F)F	1
DTXSID001033254	(3,3,4,4,5,5,5-Heptafluoropentyl) methoxybis(3,3,3-trifluoropropyl) silane	608300-52-3	CO[Si](CCC(F)(F)F)(CCC(F)(F)F)CCC(F)(F)C(F)(F)C(F)(F)F	1
DTXSID001033266	Ethoxydimethyl (3,3,4,4,5,5,6,6,6-nonafluorohexyl) silane	608301-21-9	CCO[Si](C)(C)CCC(F)(F)C(F)(F)C(F)(F)C(F)(F)F	1
DTXSID001033385	3,6,9,12,15,18,21,24,27,30-Decaoxatetratriacont-1-yl [(perfluorooctyl)sulfonyl]carbamate	64309-62-2	CCCCOCCOCCOCCOCCOCCOCCOCCOCCOCCOCCOC(=O)NS(=O)(=O)C(F)(F)C(F)(F)C(F)(F)C(F)(F)C(F)(F)C(F)(F)C(F)(F)C(F)(F)F	1
DTXSID001033492	1-(Perfluoroethyl)decane	69125-77-5	CCCCCCCCCCC(F)(F)C(F)(F)F	1
DTXSID001033628	1-[(2R)-2-(2,4-Dichlorophenyl)-3-(1,1,2,2-tetrafluoroethoxy)propyl]-1H-1,2,4-triazole	131320-41-7	FC(F)C(F)(F)OC[C@@H](CN1C=NC=N1)C1=C(Cl)C=C(Cl)C=C1	1
DTXSID001033666	Perfluoro-3,6,9-trioxaundecanoic acid	80153-83-9	OC(=O)C(F)(F)OC(F)(F)C(F)(F)OC(F)(F)C(F)(F)OC(F)(F)C(F)(F)F	1
DTXSID001033678	N-[3-(N,N-Dimethyl-N-oxidoamino)propyl]-3,3,4,4,5,5,6,6,7,7,8,8,8-tridecafluoro-N-methyloctanesulfonamide	80475-34-9	CN(CCC[N+](C)(C)[O-])S(=O)(=O)CCC(F)(F)C(F)(F)C(F)(F)C(F)(F)C(F)(F)C(F)(F)F	1
DTXSID001033680	Sodium 2-[[3-[[(perfluorohexyl)sulfonyl]amino]propyl]amino]ethanesulfonate	80621-18-7	[Na+].[O-]S(=O)(=O)CCNCCCNS(=O)(=O)C(F)(F)C(F)(F)C(F)(F)C(F)(F)C(F)(F)C(F)(F)F	1
DTXSID001033804	N-Butyl-perfluorobutanesulfonamide	864069-33-0	CCCCNS(=O)(=O)C(F)(F)C(F)(F)C(F)(F)C(F)(F)F	1
DTXSID001033816	Sodium 2-hydroxy-3-[methyl[(perfluorobutyl)sulfonyl]amino]-1-propanesulfonate	864069-38-5	[Na+].CN(CC(O)CS([O-])(=O)=O)S(=O)(=O)C(F)(F)C(F)(F)C(F)(F)C(F)(F)F	1
DTXSID001033880	Lithium 4-[(2-hydroxyethyl)[(perfluorobutyl)sulfonyl]amino]butanesulfonate	864069-51-2	[Li+].OCCN(CCCCS([O-])(=O)=O)S(=O)(=O)C(F)(F)C(F)(F)C(F)(F)C(F)(F)F	1
DTXSID001034026	Disodium perfluoro-3,5,7,10,13-pentaoxapentadecanedioate	88707-87-3	[Na+].[Na+].[O-]C(=O)C(F)(F)OC(F)(F)OC(F)(F)OC(F)(F)C(F)(F)OC(F)(F)C(F)(F)OC(F)(F)C([O-])=O	1
DTXSID001034052	Potassium 4-[(perfluorooctyl)oxy]benzoate	89932-68-3	[K+].[O-]C(=O)C1=CC=C(OC(F)(F)C(F)(F)C(F)(F)C(F)(F)C(F)(F)C(F)(F)C(F)(F)C(F)(F)F)C=C1	1
DTXSID001034119	2-[3-[[(Perfluorooctyl) sulfonyl]amino]propoxy]-N,N,N-trimethylethanaminium 4-methylbenzenesulfonate	91707-63-0	CC1=CC=C(C=C1)S([O-])(=O)=O.C[N+](C)(C)CCOCCCNS(=O)(=O)C(F)(F)C(F)(F)C(F)(F)C(F)(F)C(F)(F)C(F)(F)C(F)(F)C(F)(F)F	1
DTXSID001034121	4-[(Perfluorooctyl)sulfonyl]-1-(2-hydroxyethyl)-1-methylpiperazinium bromide	91707-64-1	[Br-].C[N+]1(CCO)CCN(CC1)S(=O)(=O)C(F)(F)C(F)(F)C(F)(F)C(F)(F)C(F)(F)C(F)(F)C(F)(F)C(F)(F)F	1
DTXSID001034157	2,2,3-Trifluoro-3-[1,1,2,2-tetrafluoro-2-(trifluoromethoxy)ethoxy]propanoic acid	919005-12-2	OC(=O)C(F)(F)C(F)OC(F)(F)C(F)(F)OC(F)(F)F	1
DTXSID001034183	2,2,3,4,4-Pentafluoro-4-[1,1,2,2,3,3-hexafluoro-3-(trifluoromethoxy)propoxy]butanoic acid	919005-27-9	OC(=O)C(F)(F)C(F)C(F)(F)OC(F)(F)C(F)(F)C(F)(F)OC(F)(F)F	1
DTXSID001034214	2-[1,1,2-Trifluoro-2-[1,1,2,2-tetrafluoro-2-(1,1,2,2,3,3,3-heptafluoropropoxy)ethoxy]ethoxy]acetic acid	919005-35-9	OC(=O)COC(F)(F)C(F)OC(F)(F)C(F)(F)OC(F)(F)C(F)(F)C(F)(F)F	1
DTXSID001034238	2-[Perfluoro-3-(propoxy)propoxy]acetic acid	919005-46-2	OC(=O)COC(F)(F)C(F)(F)C(F)(F)OC(F)(F)C(F)(F)C(F)(F)F	1
DTXSID001034357	3-({3-[(2-Hydroxyethyl)(dimethyl)azaniumyl]propyl}[(perfluoroheptyl)sulfonyl]amino)-1-propanesulfonate	2089108-96-1	C[N+](C)(CCO)CCCN(CCCS([O-])(=O)=O)S(=O)(=O)C(F)(F)C(F)(F)C(F)(F)C(F)(F)C(F)(F)C(F)(F)C(F)(F)F	1
DTXSID001034557	1-Hydroxy-5:2 fluorotelomer sulfonic acid	2089110-00-7	OC(CC(F)(F)C(F)(F)C(F)(F)C(F)(F)C(F)(F)F)S(O)(=O)=O	1
DTXSID001034569	1-Hydroxy-6:2 fluorotelomer sulfonate	NOCAS_1034569	OC(CC(F)(F)C(F)(F)C(F)(F)C(F)(F)C(F)(F)C(F)(F)F)S([O-])(=O)=O	1
DTXSID001034595	6:2 Fluorotelomer sulfide (1-methanol 2-methanol) propanoate	NOCAS_1034595	OCC(SCCC(O)=O)C(CO)C(F)(F)C(F)(F)C(F)(F)C(F)(F)C(F)(F)C(F)(F)F	1
DTXSID001034602	1-Hydroxy-11:2 fluorotelomer sulfonic acid	NOCAS_1034602	OC(CC(F)(F)C(F)(F)C(F)(F)C(F)(F)C(F)(F)C(F)(F)C(F)(F)C(F)(F)C(F)(F)C(F)(F)C(F)(F)F)S(O)(=O)=O	1
DTXSID001034652	10:2 Fluorotelomer ketone sulfonate	NOCAS_1034652	OS(=O)(=O)CC(=O)CC(F)(F)C(F)(F)C(F)(F)C(F)(F)C(F)(F)C(F)(F)C(F)(F)C(F)(F)C(F)(F)C(F)(F)F	1
DTXSID001034664	8:2 fluorotelomer sulfate	NOCAS_1034664	OS(=O)(=O)OCCC(F)(F)C(F)(F)C(F)(F)C(F)(F)C(F)(F)C(F)(F)C(F)(F)C(F)(F)F	1
DTXSID001034707	6:2 Fluorotelomer sulfonamido propyl methyl amine	NOCAS_1034707	CNCCCNS(=O)(=O)CCC(F)(F)C(F)(F)C(F)(F)C(F)(F)C(F)(F)C(F)(F)F	1
DTXSID001034721	N-[3-(Dimethylamino)propyl]-perfluoropropanamide	1858540-01-8	CN(C)CCCNC(=O)C(F)(F)C(F)(F)F	1
DTXSID001034733	8:2 Fluorotelomer sulfonamido propyl amine	NOCAS_1034733	NCCCNS(=O)(=O)CCC(F)(F)C(F)(F)C(F)(F)C(F)(F)C(F)(F)C(F)(F)C(F)(F)C(F)(F)F	1
DTXSID001034745	2-(Perfluorododecyl)ethane-1-thiol	79840-60-1	FC(F)(F)C(F)(F)C(F)(F)C(F)(F)C(F)(F)C(F)(F)C(F)(F)C(F)(F)C(F)(F)C(F)(F)C(F)(F)C(F)(F)CCS	1
DTXSID001034757	N-[3-(Dimethylamino)propyl]-perfluorotridecane-1-sulfonamide	NOCAS_1034757	CN(C)CCCNS(=O)(=O)C(F)(F)C(F)(F)C(F)(F)C(F)(F)C(F)(F)C(F)(F)C(F)(F)C(F)(F)C(F)(F)C(F)(F)C(F)(F)C(F)(F)C(F)(F)F	1
DTXSID001034769	N,N-Dimethyl-N-{2-oxo-2-[(propan-2-yl)oxy]ethyl}-3-(perfluorohexanamido)propan-1-aminium	NOCAS_1034769	CC(C)OC(=O)C[N+](C)(C)CCCNC(=O)C(F)(F)C(F)(F)C(F)(F)C(F)(F)C(F)(F)F	1
DTXSID001034795	Perfluoro-12-methoxydodecane-1-sulfonic acid	NOCAS_1034795	OS(=O)(=O)C(F)(F)C(F)(F)C(F)(F)C(F)(F)C(F)(F)C(F)(F)C(F)(F)C(F)(F)C(F)(F)C(F)(F)C(F)(F)C(F)(F)OC(F)(F)F	1
DTXSID001034802	3-{[3-(Dimethylamino)propyl][(perfluorotridecyl)sulfonyl]amino}propanoic acid	NOCAS_1034802	CN(C)CCCN(CCC(O)=O)S(=O)(=O)C(F)(F)C(F)(F)C(F)(F)C(F)(F)C(F)(F)C(F)(F)C(F)(F)C(F)(F)C(F)(F)C(F)(F)C(F)(F)C(F)(F)C(F)(F)F	1
DTXSID001034826	Perfluorotetradecyl hydrogen sulfate	NOCAS_1034826	OS(=O)(=O)OC(F)(F)C(F)(F)C(F)(F)C(F)(F)C(F)(F)C(F)(F)C(F)(F)C(F)(F)C(F)(F)C(F)(F)C(F)(F)C(F)(F)C(F)(F)C(F)(F)F	1
DTXSID001034838	Perfluoropropyl hydrogen sulfate	NOCAS_1034838	OS(=O)(=O)OC(F)(F)C(F)(F)C(F)(F)F	1
DTXSID001034840	Perfluoro-3-butylcyclopentane-1-sulfonic acid	NOCAS_1034840	OS(=O)(=O)C1(F)C(F)(F)C(F)(F)C(F)(C(F)(F)C(F)(F)C(F)(F)C(F)(F)F)C1(F)F	1
DTXSID001034852	3-[(3-{[(Perfluorodecyl)sulfonyl]amino}propyl)(dimethyl)ammonio]propanoate	NOCAS_1034852	C[N+](C)(CCCNS(=O)(=O)C(F)(F)C(F)(F)C(F)(F)C(F)(F)C(F)(F)C(F)(F)C(F)(F)C(F)(F)C(F)(F)C(F)(F)F)CCC([O-])=O	1
DTXSID001034876	3-[(3-{Ethyl[(perfluorobutyl)sulfonyl]amino}propyl)(dimethyl)azaniumyl]propanoate	NOCAS_1034876	CCN(CCC[N+](C)(C)CCC([O-])=O)S(=O)(=O)C(F)(F)C(F)(F)C(F)(F)C(F)(F)F	1
DTXSID001034888	3-[(3-{Ethyl[(perfluoroheptyl)sulfonyl]amino}propyl)(dimethyl)azaniumyl]propanoate	NOCAS_1034888	CCN(CCC[N+](C)(C)CCC([O-])=O)S(=O)(=O)C(F)(F)C(F)(F)C(F)(F)C(F)(F)C(F)(F)C(F)(F)C(F)(F)F	1
DTXSID001034907	Perfluoro-5-methylcyclohexane-1-carboxylic acid	NOCAS_1034907	OC(=O)C1(F)C(F)(F)C(F)(F)C(F)(F)C(F)(C(F)(F)F)C1(F)F	1
DTXSID001034933	2-Hydroxy-N-(3-{(2-hydroxy-3-sulfopropyl)[(perfluoropentyl)sulfonyl]amino}propyl)-N,N-dimethyl-3-sulfo-1-propanaminium	NOCAS_1034933	C[N+](C)(CCCN(CC(O)CS(O)(=O)=O)S(=O)(=O)C(F)(F)C(F)(F)C(F)(F)C(F)(F)C(F)(F)F)CC(O)CS(O)(=O)=O	1
DTXSID001034957	N-(2-Hydroxyethyl)-N-methyl-3-[(perfluorooctanesulfonyl)amino]-N-(3-sulfopropyl)propan-1-aminium	NOCAS_1034957	C[N+](CCO)(CCCNS(=O)(=O)C(F)(F)C(F)(F)C(F)(F)C(F)(F)C(F)(F)C(F)(F)C(F)(F)C(F)(F)F)CCCS(O)(=O)=O	1
DTXSID001034969	N-(3-{(Carboxymethyl)[(perfluoroheptyl)sulfonyl]amino}propyl)-2-hydroxy-N,N-dimethyl-3-sulfo-1-propanaminium	NOCAS_1034969	C[N+](C)(CCCN(CC(O)=O)S(=O)(=O)C(F)(F)C(F)(F)C(F)(F)C(F)(F)C(F)(F)C(F)(F)C(F)(F)F)CC(O)CS(O)(=O)=O	1
DTXSID001034971	N-(3-{(Carboxymethyl)[(perfluorooctyl)sulfonyl]amino}propyl)-2-hydroxy-N,N-dimethyl-3-sulfo-1-propanaminium	NOCAS_1034971	C[N+](C)(CCCN(CC(O)=O)S(=O)(=O)C(F)(F)C(F)(F)C(F)(F)C(F)(F)C(F)(F)C(F)(F)C(F)(F)C(F)(F)F)CC(O)CS(O)(=O)=O	1
DTXSID001034983	{[(Perfluorohexyl)sulfonyl]amino}-3-betaine	NOCAS_1034983	C[N+](C)(CCCNS(=O)(=O)C(F)(F)C(F)(F)C(F)(F)C(F)(F)C(F)(F)C(F)(F)F)CC([O-])=O	1
DTXSID001034995	3-[(Perfluoroundecanesulfonyl)amino]propane-1-sulfonic acid	NOCAS_1034995	OS(=O)(=O)CCCNS(=O)(=O)C(F)(F)C(F)(F)C(F)(F)C(F)(F)C(F)(F)C(F)(F)C(F)(F)C(F)(F)C(F)(F)C(F)(F)C(F)(F)F	1
DTXSID001035012	3-[{3-[(Carboxymethyl)(perfluorododecanesulfonyl)amino]propyl}(dimethyl)azaniumyl]propane-1-sulfonate	NOCAS_1035012	C[N+](C)(CCCN(CC(O)=O)S(=O)(=O)C(F)(F)C(F)(F)C(F)(F)C(F)(F)C(F)(F)C(F)(F)C(F)(F)C(F)(F)C(F)(F)C(F)(F)C(F)(F)C(F)(F)F)CCCS([O-])(=O)=O	1
DTXSID001035048	(E)-5-((Perfluoropent-1-enyl)fluoromethyl)perfluoropentane-1-sulfonic acid	NOCAS_1035048	OS(=O)(=O)C(F)(F)C(F)(F)C(F)(F)C(F)(F)C(F)(F)C(F)C(\F)=C(/F)C(F)(F)C(F)(F)C(F)(F)F	1
DTXSID001035050	(E)-5-((Perfluorohex-1-enyl)fluoromethyl)perfluoropentane-1-sulfonic acid	NOCAS_1035050	OS(=O)(=O)C(F)(F)C(F)(F)C(F)(F)C(F)(F)C(F)(F)C(F)C(\F)=C(/F)C(F)(F)C(F)(F)C(F)(F)C(F)(F)F	1
DTXSID001035117	(E)-5-((Perfluorodec-1-enyl)fluoromethyl)perfluoropentane-1-sulfonic acid	NOCAS_1035117	OS(=O)(=O)C(F)(F)C(F)(F)C(F)(F)C(F)(F)C(F)(F)C(F)C(\F)=C(/F)C(F)(F)C(F)(F)C(F)(F)C(F)(F)C(F)(F)C(F)(F)C(F)(F)C(F)(F)F	1
DTXSID001035129	2H-Perfluorononanoic acid	NOCAS_1035129	OC(=O)C(F)C(F)(F)C(F)(F)C(F)(F)C(F)(F)C(F)(F)C(F)(F)C(F)(F)F	1
DTXSID001035131	(E)-Perfluoro-2-hex-4-eneoxyacetic acid	NOCAS_1035131	OC(=O)C(F)(F)OC(F)(F)C(F)(F)C(F)(F)C(\F)=C(/F)C(F)(F)F	1
DTXSID001035143	2H-Perfluorododecanoic acid	NOCAS_1035143	OC(=O)C(F)C(F)(F)C(F)(F)C(F)(F)C(F)(F)C(F)(F)C(F)(F)C(F)(F)C(F)(F)C(F)(F)C(F)(F)F	1
DTXSID001035155	{(Carboxymethyl)[(perfluoroundecyl)sulfonyl]amino}-3-betaine	NOCAS_1035155	C[N+](C)(CCCN(CC(O)=O)S(=O)(=O)C(F)(F)C(F)(F)C(F)(F)C(F)(F)C(F)(F)C(F)(F)C(F)(F)C(F)(F)C(F)(F)C(F)(F)C(F)(F)F)CC([O-])=O	1
DTXSID001035167	3-{(Perfluoroethanesulfonyl)[3-(trimethylazaniumyl)propyl]amino}propanoate	NOCAS_1035167	C[N+](C)(C)CCCN(CCC([O-])=O)S(=O)(=O)C(F)(F)C(F)(F)F	1
DTXSID001035181	3-{(Perfluoroundecanesulfonyl)[3-(trimethylazaniumyl)propyl]amino}propanoate	NOCAS_1035181	C[N+](C)(C)CCCN(CCC([O-])=O)S(=O)(=O)C(F)(F)C(F)(F)C(F)(F)C(F)(F)C(F)(F)C(F)(F)C(F)(F)C(F)(F)C(F)(F)C(F)(F)C(F)(F)F	1
DTXSID001035193	{(2-Carboxyethyl)[(perfluorohexyl)sulfonyl]amino}-3-betaine	NOCAS_1035193	C[N+](C)(CCCN(CCC(O)=O)S(=O)(=O)C(F)(F)C(F)(F)C(F)(F)C(F)(F)C(F)(F)C(F)(F)F)CC([O-])=O	1
DTXSID001035200	(E)-Perfluorobut-2-ene-1-sulfonic acid	NOCAS_1035200	OS(=O)(=O)C(F)(F)C(\F)=C(/F)C(F)(F)F	1
DTXSID001035236	6:1 Fluorotelomer amino ethyl trimethyl ammonium	NOCAS_1035236	C[N+](C)(C)CCNCC(F)(F)C(F)(F)C(F)(F)C(F)(F)C(F)(F)C(F)(F)F	1
DTXSID001035248	14:1 Fluorotelomer amino ethyl trimethyl ammonium	NOCAS_1035248	C[N+](C)(C)CCNCC(F)(F)C(F)(F)C(F)(F)C(F)(F)C(F)(F)C(F)(F)C(F)(F)C(F)(F)C(F)(F)C(F)(F)C(F)(F)C(F)(F)C(F)(F)C(F)(F)F	1
DTXSID001035250	3-Chloro-perfluorododecanoic acid	NOCAS_1035250	OC(=O)C(F)(F)C(F)(Cl)C(F)(F)C(F)(F)C(F)(F)C(F)(F)C(F)(F)C(F)(F)C(F)(F)C(F)(F)C(F)(F)F	1
DTXSID001035329	3-{[4-(Dimethylamino)-1-hydroxy-2-butanyl][(tridecafluorohexyl)sulfonyl]amino}-1-propanesulfonic acid	NOCAS_1035329	CN(C)CCC(CO)N(CCCS(O)(=O)=O)S(=O)(=O)C(F)(F)C(F)(F)C(F)(F)C(F)(F)C(F)(F)C(F)(F)F	1
DTXSID001035331	3-{[4-(Dimethylamino)-1-hydroxy-2-butanyl][(heptadecafluorooctyl)sulfonyl]amino}-1-propanesulfonic acid	NOCAS_1035331	CN(C)CCC(CO)N(CCCS(O)(=O)=O)S(=O)(=O)C(F)(F)C(F)(F)C(F)(F)C(F)(F)C(F)(F)C(F)(F)C(F)(F)C(F)(F)F	1
DTXSID001035379	N-Propyl-N,N-dimethyl-(7-(difluoromethyl)perfluoroheptyl)methan-1-aminium	NOCAS_1035379	CCC[N+](C)(C)CC(F)(F)C(F)(F)C(F)(F)C(F)(F)C(F)(F)C(F)(F)C(F)(F)C(F)F	1
DTXSID001035412	N,N,N-Trimethyl-(13-(difluoromethyl)perfluorotridecyl)methanaminium	NOCAS_1035412	C[N+](C)(C)CC(F)(F)C(F)(F)C(F)(F)C(F)(F)C(F)(F)C(F)(F)C(F)(F)C(F)(F)C(F)(F)C(F)(F)C(F)(F)C(F)(F)C(F)(F)C(F)F	1
DTXSID001035498	3-({4-[(2,3-Dihydroxypropyl)(dimethyl)azaniumyl]-1-hydroxy-2-butanyl}[(perfluoroheptyl)sulfonyl]amino)-1-propanesulfonate	NOCAS_1035498	C[N+](C)(CCC(CO)N(CCCS([O-])(=O)=O)S(=O)(=O)C(F)(F)C(F)(F)C(F)(F)C(F)(F)C(F)(F)C(F)(F)C(F)(F)F)CC(O)CO	1
DTXSID001035505	N-Ethyl-3-{ethyl[(perfluoropropyl)sulfonyl]amino}-N,N-dimethyl-1-propanaminium	NOCAS_1035505	CCN(CCC[N+](C)(C)CC)S(=O)(=O)C(F)(F)C(F)(F)C(F)(F)F	1
DTXSID001035517	N-Ethylperfluoro-1-propanesulfonamide	1270179-74-2	CCNS(=O)(=O)C(F)(F)C(F)(F)C(F)(F)F	1
DTXSID001035529	{Ethyl[(perfluorotridecyl)sulfonyl]amino}acetic acid	NOCAS_1035529	CCN(CC(O)=O)S(=O)(=O)C(F)(F)C(F)(F)C(F)(F)C(F)(F)C(F)(F)C(F)(F)C(F)(F)C(F)(F)C(F)(F)C(F)(F)C(F)(F)C(F)(F)C(F)(F)F	1
DTXSID001035531	2-Hydroxy-N-(2-hydroxyethyl)-N,N-dimethyl-3-{[(perfluoroethyl)sulfonyl]amino}-1-propanaminium	NOCAS_1035531	C[N+](C)(CCO)CC(O)CNS(=O)(=O)C(F)(F)C(F)(F)F	1
DTXSID001035567	(Perfluorododecyl)methane-1-sulfonic acid	NOCAS_1035567	OS(=O)(=O)CC(F)(F)C(F)(F)C(F)(F)C(F)(F)C(F)(F)C(F)(F)C(F)(F)C(F)(F)C(F)(F)C(F)(F)C(F)(F)C(F)(F)F	1
DTXSID001035600	2-Hydrido-perfluoropentadecanoic acid	NOCAS_1035600	OC(=O)C(F)C(F)(F)C(F)(F)C(F)(F)C(F)(F)C(F)(F)C(F)(F)C(F)(F)C(F)(F)C(F)(F)C(F)(F)C(F)(F)C(F)(F)C(F)(F)F	1
DTXSID001035612	N-(2-Hydroxyethyl)-3-{(2-hydroxyethyl)[(perfluorononyl)sulfonyl]amino}-N,N-dimethyl-1-propanaminium	NOCAS_1035612	C[N+](C)(CCO)CCCN(CCO)S(=O)(=O)C(F)(F)C(F)(F)C(F)(F)C(F)(F)C(F)(F)C(F)(F)C(F)(F)C(F)(F)C(F)(F)F	1
DTXSID001035624	2-Hydroxy-3-({3-[(2-hydroxyethyl)(dimethyl)azaniumyl]propyl}[(perfluoroethyl)sulfonyl]amino)-1-propanesulfonate	NOCAS_1035624	C[N+](C)(CCO)CCCN(CC(O)CS([O-])(=O)=O)S(=O)(=O)C(F)(F)C(F)(F)F	1
DTXSID001035636	2-Hydroxy-3-({3-[(2-hydroxyethyl)(dimethyl)azaniumyl]propyl}[(perfluorododecyl)sulfonyl]amino)-1-propanesulfonate	NOCAS_1035636	C[N+](C)(CCO)CCCN(CC(O)CS([O-])(=O)=O)S(=O)(=O)C(F)(F)C(F)(F)C(F)(F)C(F)(F)C(F)(F)C(F)(F)C(F)(F)C(F)(F)C(F)(F)C(F)(F)C(F)(F)C(F)(F)F	1
DTXSID001035648	12:2 fluorotelomer sulfonamide	NOCAS_1035648	NS(=O)(=O)CCC(F)(F)C(F)(F)C(F)(F)C(F)(F)C(F)(F)C(F)(F)C(F)(F)C(F)(F)C(F)(F)C(F)(F)C(F)(F)C(F)(F)F	1
DTXSID001035717	1‐(Dimethylamino)‐4,4,5,5,5‐pentafluoropentan‐2‐ol	NOCAS_1035717	CN(C)CC(O)CC(F)(F)C(F)(F)F	1
DTXSID001035743	Perfluoro-3-(pentafluoro-omega6-sulfanyl)propanoic acid	NOCAS_1035743	OC(=O)C(F)(F)C(F)(F)S(F)(F)(F)(F)F	1
DTXSID001035812	[2‐Hydroxy‐3‐(3,3,4,4,4‐ pentafluorobutanesulfinyl)propyl]trimethylazanium	NOCAS_1035812	C[N+](C)(C)CC(O)CS(=O)CCC(F)(F)C(F)(F)F	1
DTXSID001035824	Perfluoro-1-nonanesulfonamide	1818833-95-2	NS(=O)(=O)C(F)(F)C(F)(F)C(F)(F)C(F)(F)C(F)(F)C(F)(F)C(F)(F)C(F)(F)C(F)(F)F	1
DTXSID001035836	{[(Perfluoroundecyl)sulfonyl]amino}acetic acid	NOCAS_1035836	OC(=O)CNS(=O)(=O)C(F)(F)C(F)(F)C(F)(F)C(F)(F)C(F)(F)C(F)(F)C(F)(F)C(F)(F)C(F)(F)C(F)(F)C(F)(F)F	1
DTXSID001035848	[2‐Hydroxy‐3‐(2-(perfluorobutyl)ethylsulfinyl)propyl]trimethylazanium	NOCAS_1035848	C[N+](C)(C)CC(O)CS(=O)CCC(F)(F)C(F)(F)C(F)(F)C(F)(F)F	1
DTXSID001035850	[2‐Hydroxy‐3‐ (2-(perfluorotetradecyl)ethylsulfinyl)propyl]trimethylazanium	NOCAS_1035850	C[N+](C)(C)CC(O)CS(=O)CCC(F)(F)C(F)(F)C(F)(F)C(F)(F)C(F)(F)C(F)(F)C(F)(F)C(F)(F)C(F)(F)C(F)(F)C(F)(F)C(F)(F)C(F)(F)C(F)(F)F	1
DTXSID001035886	{3‐[2‐(2-(Perfluorodecyl)ethanesulfonyl)acetamido]propyl}trimethylazanium	NOCAS_1035886	C[N+](C)(C)CCCNC(=O)CS(=O)(=O)CCC(F)(F)C(F)(F)C(F)(F)C(F)(F)C(F)(F)C(F)(F)C(F)(F)C(F)(F)C(F)(F)C(F)(F)F	1
DTXSID001035898	3‐(3,3,4,4,4‐Pentafluorobutanesulfonyl)propanoic acid	NOCAS_1035898	OC(=O)CCS(=O)(=O)CCC(F)(F)C(F)(F)F	1
DTXSID001035943	5‐({[(2-(Perfluorohexyl)ethyl)sulfanyl]carbonyl}amino)pentanoic acid	NOCAS_1035943	OC(=O)CCCCNC(=O)SCCC(F)(F)C(F)(F)C(F)(F)C(F)(F)C(F)(F)C(F)(F)F	1
DTXSID001035955	5‐({[(2-(Perfluorotetradecyl)ethyl)sulfanyl]carbonyl}amino)pentanoic acid	NOCAS_1035955	OC(=O)CCCCNC(=O)SCCC(F)(F)C(F)(F)C(F)(F)C(F)(F)C(F)(F)C(F)(F)C(F)(F)C(F)(F)C(F)(F)C(F)(F)C(F)(F)C(F)(F)C(F)(F)C(F)(F)F	1
DTXSID001036008	2‐[Dimethyl(3‐{2‐[(3,3,4,4,4‐pentafluorobutyl)sulfanyl]acetamido}propyl)azaniumyl]acetate	NOCAS_1036008	C[N+](C)(CCCNC(=O)CSCCC(F)(F)C(F)(F)F)CC([O-])=O	1
DTXSID001036010	2‐[Dimethyl(3‐{2‐[(perfluorotetradecyl)ethylthio]acetamido}propyl)azaniumyl]acetate	NOCAS_1036010	C[N+](C)(CCCNC(=O)CSCCC(F)(F)C(F)(F)C(F)(F)C(F)(F)C(F)(F)C(F)(F)C(F)(F)C(F)(F)C(F)(F)C(F)(F)C(F)(F)C(F)(F)C(F)(F)C(F)(F)F)CC([O-])=O	1
DTXSID001036084	3‐Hydroxy‐3‐[(3,3,4,4,5,5,6,6,6‐nonafluorohexyl)sulfanyl]propanoic acid	NOCAS_1036084	OC(CC(O)=O)SCCC(F)(F)C(F)(F)C(F)(F)C(F)(F)F	1
DTXSID001036096	{2‐Hydroxy‐3‐[2-(perfluorododecyl)ethylsulfanyl]propyl}trimethylazanium	NOCAS_1036096	C[N+](C)(C)CC(O)CSCCC(F)(F)C(F)(F)C(F)(F)C(F)(F)C(F)(F)C(F)(F)C(F)(F)C(F)(F)C(F)(F)C(F)(F)C(F)(F)C(F)(F)F	1
DTXSID001036303	3-Fluoro-3-(perfluorobutyl)prop‐2‐ene‐1‐sulfonic acid	NOCAS_1036303	OS(=O)(=O)CC=C(F)C(F)(F)C(F)(F)C(F)(F)C(F)(F)F	1
DTXSID001036341	3-Fluoro-3-(perfluoroundecyl)prop‐2‐ene‐1‐sulfonic acid	NOCAS_1036341	OS(=O)(=O)CC=C(F)C(F)(F)C(F)(F)C(F)(F)C(F)(F)C(F)(F)C(F)(F)C(F)(F)C(F)(F)C(F)(F)C(F)(F)C(F)(F)F	1
DTXSID001036353	2‐{[3‐(Acetyloxy)‐4‐(perfluorooctyl)‐1,5‐dihydroxypentan‐2‐yl]dimethylazaniumyl}acetate	NOCAS_1036353	CC(=O)OC(C(CO)C(F)(F)C(F)(F)C(F)(F)C(F)(F)C(F)(F)C(F)(F)C(F)(F)C(F)(F)F)C(CO)[N+](C)(C)CC([O-])=O	1
DTXSID001036365	2‐[Dimethyl(4,4,5,5,5‐pentafluoropentyl)azaniumyl]acetate	NOCAS_1036365	C[N+](C)(CCCC(F)(F)C(F)(F)F)CC([O-])=O	1
DTXSID001036434	3-(Perfluoropentyl)-propane‐1‐sulfonic acid	NOCAS_1036434	OS(=O)(=O)CCCC(F)(F)C(F)(F)C(F)(F)C(F)(F)C(F)(F)F	1
DTXSID001036458	3-(Perfluorobutyl)‐1‐[(2‐Hydroxyacetyl)sulfanyl]propan‐1‐one	NOCAS_1036458	OCC(=O)SC(=O)CCC(F)(F)C(F)(F)C(F)(F)C(F)(F)F	1
DTXSID001036460	3-(Perfluorohexyl)‐1‐[(2‐hydroxyacetyl)sulfanyl]propan‐1‐one	NOCAS_1036460	OCC(=O)SC(=O)CCC(F)(F)C(F)(F)C(F)(F)C(F)(F)C(F)(F)C(F)(F)F	1
DTXSID001036472	3-(Perfluorododecyl)‐1‐[(2‐hydroxyacetyl)sulfanyl]propan‐1‐one	NOCAS_1036472	OCC(=O)SC(=O)CCC(F)(F)C(F)(F)C(F)(F)C(F)(F)C(F)(F)C(F)(F)C(F)(F)C(F)(F)C(F)(F)C(F)(F)C(F)(F)C(F)(F)F	1
DTXSID001036527	2‐Hydroxy‐3‐oxo‐3‐[[3-(perfluorononyl)propanoyl]sulfanyl]propanoic acid	NOCAS_1036527	OC(C(O)=O)C(=O)SC(=O)CCC(F)(F)C(F)(F)C(F)(F)C(F)(F)C(F)(F)C(F)(F)C(F)(F)C(F)(F)C(F)(F)F	1
DTXSID001036539	2‐Hydroxy‐3‐[[3-(perfluorobutyl)propanoyl]sulfanyl]propanoic acid	NOCAS_1036539	OC(CSC(=O)CCC(F)(F)C(F)(F)C(F)(F)C(F)(F)F)C(O)=O	1
DTXSID001036541	2‐Hydroxy‐3‐[[3-(perfluorohexyl)propanoyl]sulfanyl]propanoic acid	NOCAS_1036541	OC(CSC(=O)CCC(F)(F)C(F)(F)C(F)(F)C(F)(F)C(F)(F)C(F)(F)F)C(O)=O	1
DTXSID001036591	2‐{[2‐(Acetyloxy)‐3-(perfluorotetradecyl)propyl]dimethylazaniumyl}acetate	NOCAS_1036591	CC(=O)OC(CC(F)(F)C(F)(F)C(F)(F)C(F)(F)C(F)(F)C(F)(F)C(F)(F)C(F)(F)C(F)(F)C(F)(F)C(F)(F)C(F)(F)C(F)(F)C(F)(F)F)C[N+](C)(C)CC([O-])=O	1
DTXSID001036622	2‐{[2‐(Acetyloxy)‐1,4‐dihydroxy‐3‐(perfluorotetradecyl)butyl]dimethylazaniumyl}acetate	NOCAS_1036622	CC(=O)OC(C(O)[N+](C)(C)CC([O-])=O)C(CO)C(F)(F)C(F)(F)C(F)(F)C(F)(F)C(F)(F)C(F)(F)C(F)(F)C(F)(F)C(F)(F)C(F)(F)C(F)(F)C(F)(F)C(F)(F)C(F)(F)F	1
DTXSID001036634	Dimethyl[3-(perfluorododecyl)‐2‐(formyloxy)propyl](2‐oxoethyl)azanium	NOCAS_1036634	C[N+](C)(CC=O)CC(CC(F)(F)C(F)(F)C(F)(F)C(F)(F)C(F)(F)C(F)(F)C(F)(F)C(F)(F)C(F)(F)C(F)(F)C(F)(F)C(F)(F)F)OC=O	1
DTXSID001036696	4,4,5,5,5‐Pentafluoro‐1‐(methylamino)pentan‐2‐ol	2357390-87-3	CNCC(O)CC(F)(F)C(F)(F)F	1
DTXSID001036703	1‐(Methylamino)-3-(perfluorotetradecyl)propan‐2‐ol	NOCAS_1036703	CNCC(O)CC(F)(F)C(F)(F)C(F)(F)C(F)(F)C(F)(F)C(F)(F)C(F)(F)C(F)(F)C(F)(F)C(F)(F)C(F)(F)C(F)(F)C(F)(F)C(F)(F)F	1
DTXSID001036715	(2‐Carboxyethyl)dimethyl(4,4,5,5,5‐pentafluoro‐2‐hydroxypentyl)azanium	NOCAS_1036715	C[N+](C)(CCC(O)=O)CC(O)CC(F)(F)C(F)(F)F	1
DTXSID001036822	2‐[Dimethyl[3-(perfluorohexadecyl)‐2‐hydroxypropyl]azaniumyl]acetate	NOCAS_1036822	C[N+](C)(CC(O)CC(F)(F)C(F)(F)C(F)(F)C(F)(F)C(F)(F)C(F)(F)C(F)(F)C(F)(F)C(F)(F)C(F)(F)C(F)(F)C(F)(F)C(F)(F)C(F)(F)C(F)(F)C(F)(F)F)CC([O-])=O	1
DTXSID001036834	2‐[Dimethyl(4-fluoro-4-(perfluoropropyl)‐2‐hydroxybut‐3‐en‐1‐yl)azaniumyl]acetate	NOCAS_1036834	C[N+](C)(CC(O)C=C(F)C(F)(F)C(F)(F)C(F)(F)F)CC([O-])=O	1
DTXSID001036860	2‐[Dimethyl(5,5,6,6,6‐pentafluorohexyl)azaniumyl]acetate	NOCAS_1036860	C[N+](C)(CCCCC(F)(F)C(F)(F)F)CC([O-])=O	1
DTXSID001036884	11-Hydrido-perfluorododecane-1-sulfonic acid	NOCAS_1036884	OS(=O)(=O)C(F)(F)C(F)(F)C(F)(F)C(F)(F)C(F)(F)C(F)(F)C(F)(F)C(F)(F)C(F)(F)C(F)(F)C(F)C(F)(F)F	1
DTXSID001036896	2‐(N‐Methyl-perfluorodecanesulfonamido)acetic acid	NOCAS_1036896	CN(CC(O)=O)S(=O)(=O)C(F)(F)C(F)(F)C(F)(F)C(F)(F)C(F)(F)C(F)(F)C(F)(F)C(F)(F)C(F)(F)C(F)(F)F	1
DTXSID001036903	2‐(N‐Methyl-perfluorododecanesulfonamido)acetic acid	NOCAS_1036903	CN(CC(O)=O)S(=O)(=O)C(F)(F)C(F)(F)C(F)(F)C(F)(F)C(F)(F)C(F)(F)C(F)(F)C(F)(F)C(F)(F)C(F)(F)C(F)(F)C(F)(F)F	1
DTXSID001037349	(1R,2S)-1,2-Dichloro-1,2,3,3,4,4-hexafluorocyclobutane	3934-26-7	FC1(F)C(F)(F)[C@](F)(Cl)[C@]1(F)Cl	1
DTXSID001038173	Pentanamide, 2,2,3,3,4,4,5,5,5-nonafluoro-N-[4-(2-phenyldiazenyl)phenyl]-	549499-54-9	FC(F)(F)C(F)(F)C(F)(F)C(F)(F)C(=O)NC1=CC=C(C=C1)N=NC1=CC=CC=C1	1
DTXSID001038666	Nonanamide, 2,2,3,3,4,4,5,5,6,6,7,7,8,8,9,9,9-heptadecafluoro-N-[4-(2-phenyldiazenyl)phenyl]-	540521-01-5	FC(F)(F)C(F)(F)C(F)(F)C(F)(F)C(F)(F)C(F)(F)C(F)(F)C(F)(F)C(=O)NC1=CC=C(C=C1)N=NC1=CC=CC=C1	1
DTXSID001039426	Butanamide, N,N'-[4-(phenylazo)-1,3-phenylene]bis[2,2,3,3,4,4,4-heptafluoro- (9CI)	548436-10-8	FC(F)(F)C(F)(F)C(F)(F)C(=O)NC1=CC(NC(=O)C(F)(F)C(F)(F)C(F)(F)F)=C(C=C1)N=NC1=CC=CC=C1	1
DTXSID001039921	Benzenamine, 4-[2-(2,4-dinitrophenyl)diazenyl]-N-(2,2,3,3-tetrafluoropropyl)-	295346-91-7	FC(F)C(F)(F)CNC1=CC=C(C=C1)N=NC1=C(C=C(C=C1)N(=O)=O)N(=O)=O	1
DTXSID001043079	1,1,1,3,3,3-Hexafluoropropan-2-yl 4-(3-phenoxybenzyl)piperazine-1-carboxylate	1416133-89-5	FC(F)(F)C(OC(=O)N1CCN(CC2=CC(OC3=CC=CC=C3)=CC=C2)CC1)C(F)(F)F	1
DTXSID00143087	N-((3-Chloro-4-(1,1,2,2-tetrafluoroethylsulfanyl)phenyl)carbamoyl)-2,6-difluorobenzamide	100279-10-5	FC(F)C(F)(F)SC1=C(Cl)C=C(NC(=O)NC(=O)C2=C(F)C=CC=C2F)C=C1	1
DTXSID00143103	2,3-Dichloro-4-(1,1,2,2-tetrafluoroethylsulfanyl)aniline	100280-20-4	NC1=C(Cl)C(Cl)=C(SC(F)(F)C(F)F)C=C1	1
DTXSID00143183	2,6-Difluoro-N-((2-methyl-4-(1,1,2,2-tetrafluoroethylsulfonyl)phenyl)carbamoyl)benzamide	100341-24-0	CC1=C(NC(=O)NC(=O)C2=C(F)C=CC=C2F)C=CC(=C1)S(=O)(=O)C(F)(F)C(F)F	1
DTXSID00143188	N-((2-Bromo-4-(1,1,2,2-tetrafluoroethylsulfonyl)phenyl)carbamoyl)-2,6-difluorobenzamide	100341-66-0	FC(F)C(F)(F)S(=O)(=O)C1=CC(Br)=C(NC(=O)NC(=O)C2=C(F)C=CC=C2F)C=C1	1
DTXSID00144130	4-tert-Butyl-2,6-bis(1-hydroxy-1-(trifluoromethyl)-2,2,2-trifluoroethyl)iodobenzene	101697-28-3	CC(C)(C)C1=CC(=C(I)C(=C1)C(O)(C(F)(F)F)C(F)(F)F)C(O)(C(F)(F)F)C(F)(F)F	1
DTXSID00144276	2,5-Octanedione, 7-hydroxy-8,8,8-trifluoro-7-trifluoromethyl-	101858-31-5	CC(=O)CCC(=O)CC(O)(C(F)(F)F)C(F)(F)F	1
DTXSID00144332	2,4-Heptanedione, 6-hydroxy-7,7,7-trifluoro-6-trifluoromethyl-	101913-70-6	CC(=O)CC(=O)CC(O)(C(F)(F)F)C(F)(F)F	1
DTXSID00144337	4-Heptanone, 2,6-bis(trifluoromethyl)-2,6-dihydroxy-1,1,1,7,7,7-hexafluoro-, bis(triethylamine)salt	101913-86-4	CC[NH+](CC)CC.CC[NH+](CC)CC.[O-]C(CC(=O)CC([O-])(C(F)(F)F)C(F)(F)F)(C(F)(F)F)C(F)(F)F	1
DTXSID00144372	2-Pentanone, 1-bromo-4-hydroxy-5,5,5-trifluoro-4-(trifluoromethyl)-	101931-62-8	OC(CC(=O)CBr)(C(F)(F)F)C(F)(F)F	1
DTXSID00144615	2-Propanol, 3-(2-benzothiazolyl)-1,1,1-trifluoro-2-trifluoromethyl-	102071-71-6	OC(CC1=NC2=CC=CC=C2S1)(C(F)(F)F)C(F)(F)F	1
DTXSID00145182	1H,1H,2H,2H-Perfluorooctyldimethylchlorosilane	102488-47-1	C[Si](C)(Cl)CCC(F)(F)C(F)(F)C(F)(F)C(F)(F)C(F)(F)C(F)(F)F	1	1
DTXSID00154476	2-Propyl-4-pentafluoroethyl-1-((2'-(1H-tetrazol-5-yl)biphenyl-4-yl)methyl)imidazole-5-carboxylic acid	124750-95-4	CCCC1=NC(=C(N1CC1=CC=C(C=C1)C1=CC=CC=C1C1=NNN=N1)C(O)=O)C(F)(F)C(F)(F)F	1
DTXSID00158474	(2-(F-Hexyl)ethyl) dimorpholinophosphoramidate	134051-89-1	FC(F)(F)C(F)(F)C(F)(F)C(F)(F)C(F)(F)C(F)(F)CCOP(=O)(N1CCOCC1)N1CCOCC1	1
DTXSID00159527	Silicon(4+) 3,3,4,4,5,5,6,6,7,7,8,8-dodecafluoro-1-iodooctan-1-ide 2,2',2''-nitrilotriethanolate (1:1:1)	135798-16-2	[Si+4].[O-]CCN(CC[O-])CC[O-].[H][C-](I)CC(F)(F)C(F)(F)C(F)(F)C(F)(F)C(F)(F)C(F)F	1
DTXSID00164454	Monopotassium monoperfluorohexyl ethylphosphate	150033-28-6	[K+].OP([O-])(=O)OCCC(F)(F)C(F)(F)C(F)(F)C(F)(F)C(F)(F)C(F)(F)F	1
DTXSID00166413	Perfluoro(2-methylpent-2-ene)	1584-03-8	FC(=C(C(F)(F)F)C(F)(F)F)C(F)(F)C(F)(F)F	1	1
DTXSID00178152	1-(2,2,2-Trifluoroethoxy)nonafluorocyclohexene	2356-01-6	FC1=C(OCC(F)(F)F)C(F)(F)C(F)(F)C(F)(F)C1(F)F	1
DTXSID00179503	2-Cyclopenten-1-one, 2,3,4,4,5,5-hexafluoro-	24807-10-1	FC1=C(F)C(F)(F)C(F)(F)C1=O	1
DTXSID00180876	Sodium mono(N-ethyl-2-perfluorooctylsulfonaminoethyl)sulfate	2624-81-9	[Na+].CCN(CCOS([O-])(=O)=O)S(=O)(=O)C(F)(F)C(F)(F)C(F)(F)C(F)(F)C(F)(F)C(F)(F)C(F)(F)C(F)(F)F	1
DTXSID00184314	Perfluoro-2,7-dimethyloctane	3021-63-4	FC(F)(F)C(F)(C(F)(F)F)C(F)(F)C(F)(F)C(F)(F)C(F)(F)C(F)(C(F)(F)F)C(F)(F)F	1	1
DTXSID00187143	8H-Perfluorooctane	335-65-9	FC(F)C(F)(F)C(F)(F)C(F)(F)C(F)(F)C(F)(F)C(F)(F)C(F)(F)F	1	1
DTXSID00188397	4,4,4-Trifluoro-3-hydroxy-1-(2-thienyl)-3-(trifluoromethyl)-1-butanone	34844-19-4	OC(CC(=O)C1=CC=CS1)(C(F)(F)F)C(F)(F)F	1
DTXSID00188534	(1,1,2,2-Tetrafluoroethoxy)benzene	350-57-2	FC(F)C(F)(F)OC1=CC=CC=C1	1
DTXSID00188877	Iodo-1,1,2,2-tetrafluoroethane	354-41-6	FC(F)C(F)(F)I	1
DTXSID00188933	2'-Nitro-4,4,4-trifluoro-3-(trifluoromethyl)-crotonophenone	35443-89-1	[O-][N+](=O)C1=CC=CC=C1C(=O)C=C(C(F)(F)F)C(F)(F)F	1
DTXSID00188938	4'-Fluoro-4,4,4-trifluoro-3-(trifluoromethyl)crotonophenone	35444-02-1	FC1=CC=C(C=C1)C(=O)C=C(C(F)(F)F)C(F)(F)F	1
DTXSID00188993	Methyl heptafluoropropylketone	355-17-9	CC(=O)C(F)(F)C(F)(F)C(F)(F)F	1	1
DTXSID00188998	Perfluorohept-1-ene	355-63-5	FC(F)=C(F)C(F)(F)C(F)(F)C(F)(F)C(F)(F)C(F)(F)F	1	1
DTXSID00189066	Tetrafluorosuccinyl chloride	356-15-0	FC(F)(C(Cl)=O)C(F)(F)C(Cl)=O	1
DTXSID00189465	2,2,3,3,4,4,5,5,6,6-Decafluoro-1-(trifluoromethyl)piperidine	359-71-7	FC(F)(F)N1C(F)(F)C(F)(F)C(F)(F)C(F)(F)C1(F)F	1	1
DTXSID00190839	1,1,1,2,2,3,3-Heptafluoro-4-chlorobutane	374-97-0	FC(F)(F)C(F)(F)C(F)(F)CCl	1	1
DTXSID00190950	6:1 Fluorotelomer alcohol	375-82-6	OCC(F)(F)C(F)(F)C(F)(F)C(F)(F)C(F)(F)C(F)(F)F	1	1
DTXSID00192272	1,1,2,2-Tetrafluorocyclopropane	3899-71-6	FC1(F)CC1(F)F	1
DTXSID00194615	1H,1H,9H-Perfluorononyl acrylate	4180-26-1	FC(F)C(F)(F)C(F)(F)C(F)(F)C(F)(F)C(F)(F)C(F)(F)C(F)(F)COC(=O)C=C	1	1
DTXSID00195026	1H,1H-Perfluoropropylamine	422-03-7	NCC(F)(F)C(F)(F)F	1
DTXSID00195203	Ethenyl perfluoropentanoate	424-37-3	FC(F)(F)C(F)(F)C(F)(F)C(F)(F)C(=O)OC=C	1	1
DTXSID00196230	Iodononafluoro-t-butane	4459-18-1	FC(F)(F)C(I)(C(F)(F)F)C(F)(F)F	1	1
DTXSID00201737	Perfluoro-1-propanol	53520-89-1	OC(F)(F)C(F)(F)C(F)F	1
DTXSID00202300	Phenyltetrafluoroethyl ether	53998-02-0	OC1=CC=CC(=C1)C(F)(F)C(F)F	1
DTXSID00203453	Perfluorobicyclo-(4.4.0)-dec-1,6-ene	54939-04-7	FC1(F)C2=C(C(F)(F)C(F)(F)C1(F)F)C(F)(F)C(F)(F)C(F)(F)C2(F)F	1
DTXSID00207592	Allyl pentafluoropropionate	58883-50-4	FC(F)(F)C(F)(F)C(=O)OCC=C	1
DTXSID00210081	2,2-Dichlorotrifluoroethyl 1,1,3-trichlorotetrafluoropropyl ether	61196-11-0	FC(F)(Cl)C(F)(F)C(Cl)(Cl)OC(F)(F)C(F)(Cl)Cl	1
DTXSID00210900	Perfluorotriethylcarbinol	6189-00-0	OC(C(F)(F)C(F)(F)F)(C(F)(F)C(F)(F)F)C(F)(F)C(F)(F)F	1	1
DTXSID00213537	1-Bromo-1,1,2,2,3,3-hexafluoropropane	63905-11-3	FC(F)C(F)(F)C(F)(F)Br	1
DTXSID00220408	3,4,5-Tris(1,1,2,2-tetrafluoroethoxy)benzeneethanamine, hydrochloride	70126-64-6	Cl.NCCC1=CC(OC(F)(F)C(F)F)=C(OC(F)(F)C(F)F)C(OC(F)(F)C(F)F)=C1	1
DTXSID00223797	Dichloromethyl((perfluorohexyl)ethyl)silane	73609-36-6	C[Si](Cl)(Cl)CCC(F)(F)C(F)(F)C(F)(F)C(F)(F)C(F)(F)C(F)(F)F	1	1
DTXSID00226440	Perfluorohex-1-ene	755-25-9	FC(F)=C(F)C(F)(F)C(F)(F)C(F)(F)C(F)(F)F	1	1
DTXSID00226506	Trichloro(3-(1,1,2,2-tetrafluoroethoxy)propyl)silane	756-76-3	FC(F)C(F)(F)OCCC[Si](Cl)(Cl)Cl	1
DTXSID00227578	Heptadecafluorooctane-1-sulphonamide, compound with triethylamine (1:1)	76752-82-4	CCN(CC)CC.NS(=O)(=O)C(F)(F)C(F)(F)C(F)(F)C(F)(F)C(F)(F)C(F)(F)C(F)(F)C(F)(F)F	1	1
DTXSID00227710	Begacestat	769169-27-9	OC[C@@H](NS(=O)(=O)C1=CC=C(Cl)S1)C(C(F)(F)F)C(F)(F)F	1
DTXSID00229537	2,2,4,4-Tetra(trifluoromethyl)-1,3-dithiacyclobutane	791-50-4	FC(F)(F)C1(SC(S1)(C(F)(F)F)C(F)(F)F)C(F)(F)F	1
DTXSID00234762	1-Ethoxy-2-(1,1,2,2-tetrafluoroethoxy)ethane	85567-23-3	CCOCCOC(F)(F)C(F)F	1
DTXSID00234929	(3-(((Heptadecafluorooctyl)sulphonyl)amino)propyl)trimethylammonium hydroxide	85665-67-4	[OH-].C[N+](C)(C)CCCNS(=O)(=O)C(F)(F)C(F)(F)C(F)(F)C(F)(F)C(F)(F)C(F)(F)C(F)(F)C(F)(F)F	1	1
DTXSID00235916	2-Propanone, hexafluoro-, 2-(2,6-dinitro-4-(trifluoromethyl)phenyl)hydrazone	86870-50-0	[O-][N+](=O)C1=CC(=CC(=C1NN=C(C(F)(F)F)C(F)(F)F)[N+]([O-])=O)C(F)(F)F	1
DTXSID00237536	2,5-Bis(1,1,2,2,2-pentafluoroethyl)-1,3,4-oxadiazole	891-87-2	FC(F)(F)C(F)(F)C1=NN=C(O1)C(F)(F)C(F)(F)F	1
DTXSID00239570	Potassium 1,1,2,3,3,3-hexafluoro-2-(trifluoromethyl)propanesulfonate	93762-10-8	[K+].[O-]S(=O)(=O)C(F)(F)C(F)(C(F)(F)F)C(F)(F)F	1	1
DTXSID00239595	Ammonium bis(2-(perfluorododecyl)ethyl) phosphate	93776-22-8	[NH4+].[O-]P(=O)(OCCC(F)(F)C(F)(F)C(F)(F)C(F)(F)C(F)(F)C(F)(F)C(F)(F)C(F)(F)C(F)(F)C(F)(F)C(F)(F)C(F)(F)F)OCCC(F)(F)C(F)(F)C(F)(F)C(F)(F)C(F)(F)C(F)(F)C(F)(F)C(F)(F)C(F)(F)C(F)(F)C(F)(F)C(F)(F)F	1	1
DTXSID00239858	1,1,2,2,3,3,4,4-Octafluoro-N,N-bis(2-hydroxyethyl)butane-1-sulphonamide	93894-54-3	OCCN(CCO)S(=O)(=O)C(F)(F)C(F)(F)C(F)(F)C(F)F	1	1
DTXSID00240984	(Perfluoro-9-methyldecyl)ethyl dihydrogen phosphate	94200-56-3	OP(O)(=O)OCCC(F)(F)C(F)(F)C(F)(F)C(F)(F)C(F)(F)C(F)(F)C(F)(F)C(F)(F)C(F)(C(F)(F)F)C(F)(F)F	1	1
DTXSID00244104	Cyclopentane, octafluorobis(trifluoromethyl)-	99510-46-0	FC(F)(F)C1(C(F)(F)F)C(F)(F)C(F)(F)C(F)(F)C1(F)F	1
DTXSID00244341	1,1-Dichloro-5,5,5-trifluoro-4-(trifluoromethyl)penta-1,3-diene	99903-40-9	FC(F)(F)C(=CC=C(Cl)Cl)C(F)(F)F	1
DTXSID00244346	1-Chloro-4-(3,3,3-trifluoro-2-(trifluoromethyl)prop-1-enyl)benzene	99903-56-7	FC(F)(F)C(=CC1=CC=C(Cl)C=C1)C(F)(F)F	1
DTXSID0027141	Perfluorotributylamine	311-89-7	FC(F)(F)C(F)(F)C(F)(F)C(F)(F)N(C(F)(F)C(F)(F)C(F)(F)C(F)(F)F)C(F)(F)C(F)(F)C(F)(F)C(F)(F)F	1	1
DTXSID00276400	4-Hepten-3-one, 1,1,2,2-tetrafluoro-5-mercapto-	88552-05-0	CCC(S)=CC(=O)C(F)(F)C(F)F	1
DTXSID00276960	bis(2,2,3,3,4,4,5,5-octafluoropentyl) pentanedioate	308-36-1	FC(F)C(F)(F)C(F)(F)C(F)(F)COC(=O)CCCC(=O)OCC(F)(F)C(F)(F)C(F)(F)C(F)F	1
DTXSID00283715	2-amino-5-fluoro-6-(pentafluoroethyl)pyrimidin-4(1h)-one	719-21-1	NC1=NC(=O)C(F)=C(N1)C(F)(F)C(F)(F)F	1
DTXSID00285794	2,2,3,3,4,4,4-heptafluoro-1,1-diphenylbutan-1-ol	559-54-6	OC(C1=CC=CC=C1)(C1=CC=CC=C1)C(F)(F)C(F)(F)C(F)(F)F	1
DTXSID00290782	3,5-Bis(heptafluoropropyl)-1H-1,2,4-triazole	801-28-5	FC(F)(F)C(F)(F)C(F)(F)C1=NC(=NN1)C(F)(F)C(F)(F)C(F)(F)F	1
DTXSID00292105	4,4,5,5,6,6,6-heptafluoro-1-(3-methylthiophen-2-yl)hexane-1,3-dione	575-93-9	CC1=C(SC=C1)C(=O)CC(=O)C(F)(F)C(F)(F)C(F)(F)F	1
DTXSID00292125	1-(2,5-dimethylfuran-3-yl)-4,4,5,5,6,6,6-heptafluorohexane-1,3-dione	308-42-9	CC1=CC(C(=O)CC(=O)C(F)(F)C(F)(F)C(F)(F)F)=C(C)O1	1
DTXSID00293632	3,5,6-trichloro-2,2,3,4,4,5,6,6-octafluorohexanoic acid- 1-phenylpiperazine(1:1)	1511-42-8	C1CN(CCN1)C1=CC=CC=C1.OC(=O)C(F)(F)C(F)(Cl)C(F)(F)C(F)(Cl)C(F)(F)Cl	1
DTXSID00293950	6-fluoro-2-(pentafluoroethyl)-1h-benzimidazole	5847-95-0	FC1=CC2=C(C=C1)N=C(N2)C(F)(F)C(F)(F)F	1
DTXSID00300618	1-benzyl-2,2,3-trifluoro-3-(trifluoromethyl)aziridine	5585-30-8	FC(F)(F)C1(F)N(CC2=CC=CC=C2)C1(F)F	1
DTXSID00303689	4,4,4-trifluoro-1-(3-methylphenyl)-3-(trifluoromethyl)but-2-en-1-one	35443-93-7	CC1=CC(=CC=C1)C(=O)C=C(C(F)(F)F)C(F)(F)F	1
DTXSID00303700	6,6,6-trifluoro-2,2-dimethyl-5-(trifluoromethyl)hex-4-en-3-one	35443-87-9	CC(C)(C)C(=O)C=C(C(F)(F)F)C(F)(F)F	1
DTXSID00303806	4,4,4-trifluoro-3-hydroxy-1-(4-methoxyphenyl)-2-methyl-3-(trifluoromethyl)butan-1-one	34844-28-5	COC1=CC=C(C=C1)C(=O)C(C)C(O)(C(F)(F)F)C(F)(F)F	1
DTXSID00309681	5-(2,3,3,3-Tetrafluoropropyl)-2,4(1H,3H)-pyrimidinedione	53489-95-5	FC(CC1=CNC(=O)NC1=O)C(F)(F)F	1
DTXSID00313107	ethyl 2-[2-(1,1,1,3,3,3-hexafluoro-2-hydroxypropan-2-yl)-4-methylphenyl]sulfanylacetate	63780-80-3	CCOC(=O)CSC1=C(C=C(C)C=C1)C(O)(C(F)(F)F)C(F)(F)F	1
DTXSID00314351	5-(1,1,2,2,3,3,3-heptafluoropropyl)-1-[[3-[[5-(1,1,2,2,3,3,3-heptafluoropropyl)tetrazol-1-yl]methyl]oxetan-3-yl]methyl]tetrazole	2613-48-1	FC(F)(F)C(F)(F)C(F)(F)C1=NN=NN1CC1(CN2N=NN=C2C(F)(F)C(F)(F)C(F)(F)F)COC1	1
DTXSID00314654	N-[(4-Chlorophenyl)carbamoyl]-2,2,3,3,3-pentafluoropropanamide	736-45-8	FC(F)(F)C(F)(F)C(=O)NC(=O)NC1=CC=C(Cl)C=C1	1
DTXSID00316971	2-[[1,1,1,3,3,3-hexafluoro-2-[3-[1,1,1,3,3,3-hexafluoro-2-(oxiran-2-ylmethoxy)propan-2-yl]phenyl]propan-2-yl]oxymethyl]oxirane	26146-93-0	FC(F)(F)C(OCC1CO1)(C1=CC(=CC=C1)C(OCC1CO1)(C(F)(F)F)C(F)(F)F)C(F)(F)F	1
DTXSID00319462	2,6-difluoro-N-[[4-(1,1,1,3,3,3-hexafluoro-2-hydroxypropan-2-yl)phenyl]carbamoyl]benzamide	74702-96-8	OC(C1=CC=C(NC(=O)NC(=O)C2=C(F)C=CC=C2F)C=C1)(C(F)(F)F)C(F)(F)F	1
DTXSID00320073	1-Chloro-3,3-bis(trifluoromethyl)-1,3-dihydro-1lambda~3~,2-benziodoxole	76215-48-0	FC(F)(F)C1(O[I](Cl)C2=CC=CC=C12)C(F)(F)F	1
DTXSID00320553	1,3-Bis(1,1,1,3,3,3-hexafluoro-2-methoxypropan-2-yl)benzene	53896-18-7	COC(C1=CC(=CC=C1)C(OC)(C(F)(F)F)C(F)(F)F)(C(F)(F)F)C(F)(F)F	1
DTXSID00320558	Octakis(trifluoromethyl)-1,4,6,9-tetraoxa-5lambda4-telluraspiro[4.4]nonane	23542-72-5	FC(F)(F)C1(O[Te]2(OC1(C(F)(F)F)C(F)(F)F)OC(C(F)(F)F)(C(F)(F)F)C(O2)(C(F)(F)F)C(F)(F)F)C(F)(F)F	1
DTXSID00329980	6,6,7,7,8,8,8-Heptafluoro-2,2-dimethyl-3,5-octanedione - cobalt (3:1)	62477-38-7	[Co].CC(C)(C)C(=O)CC(=O)C(F)(F)C(F)(F)C(F)(F)F.CC(C)(C)C(=O)CC(=O)C(F)(F)C(F)(F)C(F)(F)F.CC(C)(C)C(=O)CC(=O)C(F)(F)C(F)(F)C(F)(F)F	1
DTXSID00330475	(4-propan-2-ylphenyl) 1,1,2,2,3,3,4,4,4-nonafluorobutane-1-sulfonate	93131-75-0	CC(C)C1=CC=C(OS(=O)(=O)C(F)(F)C(F)(F)C(F)(F)C(F)(F)F)C=C1	1
DTXSID00335703	Methyl perfluoroheptanoate	14312-89-1	COC(=O)C(F)(F)C(F)(F)C(F)(F)C(F)(F)C(F)(F)C(F)(F)F	1	1
DTXSID00336619	Prop-2-en-1-yl heptadecafluorononanoate	117374-33-1	FC(F)(F)C(F)(F)C(F)(F)C(F)(F)C(F)(F)C(F)(F)C(F)(F)C(F)(F)C(=O)OCC=C	1	1
DTXSID00336710	2-Amino-5-fluoro-5-(trifluoromethyl)-1,3-thiazol-4(5H)-one	13973-15-4	NC1=NC(=O)C(F)(S1)C(F)(F)F	1
DTXSID00337368	5,5,6,6,6-Pentafluoro-2-hexanol	94099-52-2	CC(O)CCC(F)(F)C(F)(F)F	1
DTXSID00338350	1,1,2,2,3,3,4,4-Octafluoropentane	40723-64-6	CC(F)(F)C(F)(F)C(F)(F)C(F)F	1
DTXSID00338355	3,3,3-Trifluoro-N-(4-nitrophenyl)-2-(trifluoromethyl)propanamide	294651-51-7	[O-][N+](=O)C1=CC=C(NC(=O)C(C(F)(F)F)C(F)(F)F)C=C1	1
DTXSID00338638	2-Bromo-1,1,1,3,3,3-hexafluoro-2-(trifluoromethyl)propane	754-43-8	FC(F)(F)C(Br)(C(F)(F)F)C(F)(F)F	1
DTXSID00338673	1,2,3,4-Tetrafluoro-5-(1,1,1,2,4,4,5,5,5-nonafluoropent-2-en-3-yl)-6-(trifluoromethyl)benzene	129246-68-0	FC(=C(C1=C(C(F)=C(F)C(F)=C1F)C(F)(F)F)C(F)(F)C(F)(F)F)C(F)(F)F	1
DTXSID00338835	Diisopentyl 2-[(2,2,3,3,4,4,4-heptafluorobutanoyl)amino]succinate	75743-06-5	CC(C)CCOC(=O)C[C@H](NC(=O)C(F)(F)C(F)(F)C(F)(F)F)C(=O)OCCC(C)C	1	1
DTXSID00343540	2-Chloroheptafluoro-2-butene	434-41-3	FC(=C(Cl)C(F)(F)F)C(F)(F)F	1
DTXSID00344572	N-Methyl-bis-heptafluorobutyramide	73980-71-9	CN(C(=O)C(F)(F)C(F)(F)C(F)(F)F)C(=O)C(F)(F)C(F)(F)C(F)(F)F	1	1
DTXSID00346051	3,3,4,4,5,5,5-Heptafluoro-1-iodo-1-pentene	376-97-6	FC(F)(F)C(F)(F)C(F)(F)C=CI	1	1
DTXSID0034774	Noviflumuron	121451-02-3	FC(C(F)(F)F)C(F)(F)OC1=C(Cl)C=C(NC(=O)NC(=O)C2=C(F)C=CC=C2F)C(F)=C1Cl	1
DTXSID00348151	1-Nitro-4-[2,2,2-trifluoro-1,1-bis(trifluoromethyl)ethyl]benzene	36714-78-0	[O-][N+](=O)C1=CC=C(C=C1)C(C(F)(F)F)(C(F)(F)F)C(F)(F)F	1
DTXSID00348353	2,3,4,5,6-Pentakis(1,1,2,2,2-pentafluoroethyl)-1-azabicyclo[2.2.0]hexa-2,5-diene	30567-91-0	FC(F)(F)C(F)(F)C1=C(C(F)(F)C(F)(F)F)C2(N1C(=C2C(F)(F)C(F)(F)F)C(F)(F)C(F)(F)F)C(F)(F)C(F)(F)F	1
DTXSID00365621	2-[(2,2,3,3,4,4,4-heptafluorobutanoyl)amino]benzoic acid	82422-33-1	OC(=O)C1=CC=CC=C1NC(=O)C(F)(F)C(F)(F)C(F)(F)F	1	1
DTXSID00366012	4-(Heptafluoropropylthio)aniline	172961-00-1	NC1=CC=C(SC(F)(F)C(F)(F)C(F)(F)F)C=C1	1
DTXSID00366774	2,2,3,3-Tetrafluoropropyl 5-[(2,6-dimethoxy-4-pyrimidinyl)amino]-5-oxopentanoate	5576-93-2	COC1=NC(OC)=NC(NC(=O)CCCC(=O)OCC(F)(F)C(F)F)=C1	1
DTXSID00367403	Ethyl [2-(2-ethoxyethoxy)-1,1,1,3,3,3-hexafluoropropan-2-yl]carbamate	5226-09-5	CCOCCOC(NC(=O)OCC)(C(F)(F)F)C(F)(F)F	1
DTXSID0036926	Perfluoro-1,3-dimethylcyclohexane	335-27-3	FC(F)(F)C1(F)C(F)(F)C(F)(F)C(F)(F)C(F)(C(F)(F)F)C1(F)F	1	1
DTXSID00369341	2,2-bis(Trifluoromethyl)-2-hydroxyacetic acid	662-22-6	OC(=O)C(O)(C(F)(F)F)C(F)(F)F	1
DTXSID00369821	Perfluorooctanedioic acid	678-45-5	OC(=O)C(F)(F)C(F)(F)C(F)(F)C(F)(F)C(F)(F)C(F)(F)C(O)=O	1	1
DTXSID00370992	Allyl 1H,1H-perfluorooctyl ether	812-72-6	FC(F)(F)C(F)(F)C(F)(F)C(F)(F)C(F)(F)C(F)(F)C(F)(F)COCC=C	1	1
DTXSID00371101	bis(2,2,3,3,4,4,5,5-octafluoropentyl) sulfate	755-37-3	FC(F)C(F)(F)C(F)(F)C(F)(F)COS(=O)(=O)OCC(F)(F)C(F)(F)C(F)(F)C(F)F	1
DTXSID00371222	3-Bromo-4-chloropentafluorobutyric acid	216393-99-6	OC(=O)C(F)(F)C(F)(Br)C(F)(F)Cl	1
DTXSID00371287	1-bromo-4,4,5,5,6,6,6-heptafluoro-3,3-bis(trifluoromethyl)hex-1-ene	128454-94-4	FC(F)(F)C(F)(F)C(F)(F)C(C=CBr)(C(F)(F)F)C(F)(F)F	1	1
DTXSID00371303	1-Bromoundecafluorocyclohexane	336-13-0	FC1(F)C(F)(F)C(F)(F)C(F)(Br)C(F)(F)C1(F)F	1
DTXSID00371323	2-bromo-2,3,3,3-tetrafluoropropanoyl chloride	6066-45-1	FC(F)(F)C(F)(Br)C(Cl)=O	1
DTXSID00371601	1,4-Dibromooctafluorobutane	335-48-8	FC(F)(Br)C(F)(F)C(F)(F)C(F)(F)Br	1	1
DTXSID00371606	2,4-dibromo-3,3,4,4-tetrafluorobut-1-ene	161958-58-3	FC(F)(Br)C(F)(F)C(Br)=C	1
DTXSID00373847	tert-Butyl (1,1,1,3,3,3-hexafluoropropan-2-ylidene)carbamate	52786-55-7	CC(C)(C)OC(=O)N=C(C(F)(F)F)C(F)(F)F	1
DTXSID00374713	2-(2-aminophenyl)-1,1,1,3,3,3-hexafluoropropan-2-ol	2713-62-4	NC1=CC=CC=C1C(O)(C(F)(F)F)C(F)(F)F	1
DTXSID00374773	1,1,1-trifluoro-4-iodo-2,2-bis(trifluoromethyl)butane	14115-45-8	FC(F)(F)C(CCI)(C(F)(F)F)C(F)(F)F	1
DTXSID00375104	1H,1H-Perfluoro-n-decyl acrylate	335-83-1	FC(F)(F)C(F)(F)C(F)(F)C(F)(F)C(F)(F)C(F)(F)C(F)(F)C(F)(F)C(F)(F)COC(=O)C=C	1	1
DTXSID00375109	(Heptadecafluorooctyl)(phenyl)iodanium trifluoromethanesulfonate	77758-89-5	[O-]S(=O)(=O)C(F)(F)F.FC(F)(F)C(F)(F)C(F)(F)C(F)(F)C(F)(F)C(F)(F)C(F)(F)C(F)(F)[I+]C1=CC=CC=C1	1	1
DTXSID00377688	Methyl difluoro{1,1,2,2-tetrafluoro-2-[1,1,2,2-tetrafluoro-2-(trifluoromethoxy)ethoxy]ethoxy}acetate	169289-58-1	COC(=O)C(F)(F)OC(F)(F)C(F)(F)OC(F)(F)C(F)(F)OC(F)(F)F	1	1
DTXSID00377825	Perfluoropentanoic anhydride	308-28-1	FC(F)(F)C(F)(F)C(F)(F)C(F)(F)C(=O)OC(=O)C(F)(F)C(F)(F)C(F)(F)C(F)(F)F	1	1
DTXSID00378716	2-(Chloromethyl)-1,1,1,3,3,3-hexafluoro-2-iodopropane	240122-22-9	FC(F)(F)C(I)(CCl)C(F)(F)F	1
DTXSID00378852	1,10-Dichloroperfluorodecane	156186-28-6	FC(F)(Cl)C(F)(F)C(F)(F)C(F)(F)C(F)(F)C(F)(F)C(F)(F)C(F)(F)C(F)(F)C(F)(F)Cl	1
DTXSID00379248	5,5,6,6,7,7,7-heptafluoro-4,4-bis(trifluoromethyl)heptanoic Acid	129991-14-6	OC(=O)CCC(C(F)(F)F)(C(F)(F)F)C(F)(F)C(F)(F)C(F)(F)F	1	1
DTXSID00379268	3:3 Fluorotelomer carboxylic acid	356-02-5	OC(=O)CCC(F)(F)C(F)(F)C(F)(F)F	1	1
DTXSID00379288	cis-1-Iodo-2-(heptafluoropropyl)cyclohexane	7589-43-7	FC(F)(F)C(F)(F)C(F)(F)[C@H]1CCCC[C@H]1I	1	1
DTXSID00379329	(1,1,1,3,3,3-Hexafluoropropane-2,2-diyl)di(4,1-phenylene) bis(2-methylprop-2-enoate)	108050-42-6	CC(=C)C(=O)OC1=CC=C(C=C1)C(C1=CC=C(OC(=O)C(C)=C)C=C1)(C(F)(F)F)C(F)(F)F	1
DTXSID00379546	Methyl 4H-perfluorobutanoate	356-32-1	COC(=O)C(F)(F)C(F)(F)C(F)F	1
DTXSID00379561	Methyl perfluorooctadecanoate	16753-33-6	COC(=O)C(F)(F)C(F)(F)C(F)(F)C(F)(F)C(F)(F)C(F)(F)C(F)(F)C(F)(F)C(F)(F)C(F)(F)C(F)(F)C(F)(F)C(F)(F)C(F)(F)C(F)(F)C(F)(F)C(F)(F)F	1	1
DTXSID00379566	Methyl perfluoroundecanoate	203302-98-1	COC(=O)C(F)(F)C(F)(F)C(F)(F)C(F)(F)C(F)(F)C(F)(F)C(F)(F)C(F)(F)C(F)(F)C(F)(F)F	1	1
DTXSID00379703	7,7,8,8,9,9,10,10,10-nonafluorodecan-1-ol	181042-39-7	OCCCCCCC(F)(F)C(F)(F)C(F)(F)C(F)(F)F	1	1
DTXSID00379708	2-[3,3,3-trifluoro-2,2-bis(trifluoromethyl)propyl]oxirane	502482-28-2	FC(F)(F)C(CC1CO1)(C(F)(F)F)C(F)(F)F	1
DTXSID00379728	5H-Octafluoropentanoyl chloride	376-71-6	FC(F)C(F)(F)C(F)(F)C(F)(F)C(Cl)=O	1
DTXSID00379748	4-(1,1,2,2,2-pentafluoroethoxy)phenol	658-46-8	OC1=CC=C(OC(F)(F)C(F)(F)F)C=C1	1
DTXSID00379783	(Perfluorocyclohexyl)methyl methacrylate	25965-83-7	CC(=C)C(=O)OCC1(F)C(F)(F)C(F)(F)C(F)(F)C(F)(F)C1(F)F	1	1
DTXSID00379829	7H-Perfluoroheptanoyl chloride	41405-35-0	FC(F)C(F)(F)C(F)(F)C(F)(F)C(F)(F)C(F)(F)C(Cl)=O	1	1
DTXSID00379864	1,1,2,2,3,3,4,4,5,5,6,6-dodecafluoro-1-iodohexane	63703-16-2	FC(F)C(F)(F)C(F)(F)C(F)(F)C(F)(F)C(F)(F)I	1
DTXSID00379884	3-(Perfluoro-3-methylbutyl)-1,2-propenoxide	54009-81-3	FC(F)(F)C(F)(C(F)(F)F)C(F)(F)C(F)(F)CC1CO1	1	1
DTXSID00379925	Perfluorononanoyl chloride	52447-23-1	FC(F)(F)C(F)(F)C(F)(F)C(F)(F)C(F)(F)C(F)(F)C(F)(F)C(F)(F)C(Cl)=O	1	1
DTXSID00379960	1H,1H,8H-Perfluoro-1-octanol	10331-08-5	OCC(F)(F)C(F)(F)C(F)(F)C(F)(F)C(F)(F)C(F)(F)C(F)F	1	1
DTXSID00379980	3,3,4,4,5,5,6,6,7,7,8,8,8-tridecafluorooctyl 2-methylpropanoate	242812-05-1	CC(C)C(=O)OCCC(F)(F)C(F)(F)C(F)(F)C(F)(F)C(F)(F)C(F)(F)F	1	1
DTXSID00380031	Perfluorotridecane	376-03-4	FC(F)(F)C(F)(F)C(F)(F)C(F)(F)C(F)(F)C(F)(F)C(F)(F)C(F)(F)C(F)(F)C(F)(F)C(F)(F)C(F)(F)C(F)(F)F	1	1
DTXSID00380197	2,2,3,3-Tetrafluoro-2,3-dihydro-1,4-benzodioxin-6-amine	89586-07-2	NC1=CC2=C(OC(F)(F)C(F)(F)O2)C=C1	1
DTXSID00380213	Tetrafluorosuccinyl fluoride	679-13-0	FC(=O)C(F)(F)C(F)(F)C(F)=O	1
DTXSID00380218	1,1,1,2-tetrafluoro-2-iodoethane	3831-49-0	FC(I)C(F)(F)F	1
DTXSID00380273	1,1,2-Tribromopentafluorocyclobutane	142764-86-1	FC1(F)C(F)(F)C(Br)(Br)C1(F)Br	1
DTXSID00380753	Trimethylsilyl perfluorobutanesulfonate	68734-62-3	C[Si](C)(C)OS(=O)(=O)C(F)(F)C(F)(F)C(F)(F)C(F)(F)F	1	1
DTXSID00380798	1H,1H,11H,11H-Perfluorotetraethylene glycol	330562-44-2	OCC(F)(F)OC(F)(F)C(F)(F)OC(F)(F)C(F)(F)OC(F)(F)CO	1	1
DTXSID00380854	4,4,5,5,6,6,7,7-octafluorodeca-1,9-diene	170804-07-6	FC(F)(CC=C)C(F)(F)C(F)(F)C(F)(F)CC=C	1
DTXSID00381048	1,2-dibromo-1,2,3,3,3-pentafluoro-1-(2,2,3,3-tetrafluoropropoxy)propane	396716-51-1	FC(F)C(F)(F)COC(F)(Br)C(F)(Br)C(F)(F)F	1
DTXSID00381149	2-chloro-1,1,1,3,4,4,4-heptafluorobutane	507453-83-0	FC(C(Cl)C(F)(F)F)C(F)(F)F	1
DTXSID00381422	2,2,3,3,4,4,5,5-Octafluoro-1,6-hexanediamine	355-73-7	NCC(F)(F)C(F)(F)C(F)(F)C(F)(F)CN	1
DTXSID00382050	2-(4-Ethenylphenyl)-1,1,1,3,3,3-hexafluoropropan-2-ol	122056-08-0	OC(C1=CC=C(C=C)C=C1)(C(F)(F)F)C(F)(F)F	1
DTXSID00382070	5:1 Fluorotelomer alcohol	423-46-1	OCC(F)(F)C(F)(F)C(F)(F)C(F)(F)C(F)(F)F	1	1
DTXSID00382111	3-Chloro-2,2,3,3-tetrafluoropropanoic acid	661-82-5	OC(=O)C(F)(F)C(F)(F)Cl	1
DTXSID00382116	2-chloro-2,3,3,3-tetrafluoropropanoyl bromide	261503-70-2	FC(F)(F)C(F)(Cl)C(Br)=O	1
DTXSID00382136	2,2,3,3,4,4,5,5,6,6,7,7-dodecafluoroheptyl 2-fluoroprop-2-enoate	119986-76-4	FC(F)C(F)(F)C(F)(F)C(F)(F)C(F)(F)C(F)(F)COC(=O)C(F)=C	1
DTXSID00382151	Trimethylsilyl 1,1,2,2-tetrafluoro-2-(pentafluoroethoxy)ethane-1-sulfonate	136049-37-1	C[Si](C)(C)OS(=O)(=O)C(F)(F)C(F)(F)OC(F)(F)C(F)(F)F	1	1
DTXSID00382156	Methyl 4,4,5,5,6,6,7,7-octafluoro-3-oxoheptanoate	89129-69-1	COC(=O)CC(=O)C(F)(F)C(F)(F)C(F)(F)C(F)F	1
DTXSID00382171	2(Perfluoro-2-propyl)ethanol	90999-87-4	OCCC(F)(C(F)(F)F)C(F)(F)F	1	1
DTXSID00382353	1H,1H,2H,2H-Perfluorotetradecyltrichlorosilane	102488-50-6	FC(F)(F)C(F)(F)C(F)(F)C(F)(F)C(F)(F)C(F)(F)C(F)(F)C(F)(F)C(F)(F)C(F)(F)C(F)(F)C(F)(F)CC[Si](Cl)(Cl)Cl	1	1
DTXSID00382474	Octafluoro-3-methoxyprop-1-ene	67641-44-5	FC(F)=C(F)C(F)(F)OC(F)(F)F	1
DTXSID00386119	6,6,7,7-Tetrafluoro-5-hydroxy-2,2-dimethyl-5-phenylheptan-3-one	5568-41-2	CC(C)(C)C(=O)CC(O)(C1=CC=CC=C1)C(F)(F)C(F)F	1
DTXSID00387085	2-Tert-butyl-5-hydroxy-2-methyl-5-(1,1,2,2-tetrafluoroethyl)oxolan-3-one	6002-58-0	CC(C)(C)C1(C)OC(O)(CC1=O)C(F)(F)C(F)F	1
DTXSID00395302	Tris[4-(heptadecafluorooctyl)phenyl]phosphine	284472-92-0	FC(F)(F)C(F)(F)C(F)(F)C(F)(F)C(F)(F)C(F)(F)C(F)(F)C(F)(F)C1=CC=C(C=C1)P(C1=CC=C(C=C1)C(F)(F)C(F)(F)C(F)(F)C(F)(F)C(F)(F)C(F)(F)C(F)(F)C(F)(F)F)C1=CC=C(C=C1)C(F)(F)C(F)(F)C(F)(F)C(F)(F)C(F)(F)C(F)(F)C(F)(F)C(F)(F)F	1	1
DTXSID00395680	Allyl 2,2,3,3,3-pentafluoropropyl ether	186907-75-5	FC(F)(F)C(F)(F)COCC=C	1
DTXSID00399941	Vinyl nonafluoro-1-butanesulfonate	42409-05-2	FC(F)(F)C(F)(F)C(F)(F)C(F)(F)S(=O)(=O)OC=C	1	1
DTXSID00404882	N-(2-Hydroxyethyl)perfluorobutanamide	377-66-2	OCCNC(=O)C(F)(F)C(F)(F)C(F)(F)F	1	1
DTXSID00408502	Butanoic acid, 3,3,4,4-tetrafluoro-2-hydrazino-2-hydroxy-, hydrazide	89972-14-5	NNC(=O)C(O)(NN)C(F)(F)C(F)F	1
DTXSID00408562	Perfluoro-2-methoxyaceticacid	674-13-5	OC(=O)C(F)(F)OC(F)(F)F	1
DTXSID00409751	4-[[2,2,3,3-tetrafluoro-3-(trifluoromethoxy)propanoyl]amino]benzoate	6813-23-6	[O-]C(=O)C1=CC=C(NC(=O)C(F)(F)C(F)(F)OC(F)(F)F)C=C1	1
DTXSID0041226	1,2-Dibromotetrafluoroethane	124-73-2	FC(F)(Br)C(F)(F)Br	1
DTXSID00412609	4-(2,3-Dimethylphenyl)-5-[3-(1,1,2,2-tetrafluoroethoxy)phenyl]-2,4-dihydro-3H-1,2,4-triazole-3-thione	7167-31-9	CC1=C(C)C(=CC=C1)N1C(=S)NN=C1C1=CC(OC(F)(F)C(F)F)=CC=C1	1
DTXSID0041696	Perfluorobutanoyl fluoride	335-42-2	FC(=O)C(F)(F)C(F)(F)C(F)(F)F	1	1
DTXSID0042032	1,1-dichloro-1,2,3,3,3-pentafluoropropane	111512-56-2	FC(C(F)(F)F)C(F)(Cl)Cl	1
DTXSID00421938	BIS-AF-Sodium salt	74938-83-3	[Na+].[Na+].[O-]C1=CC=C(C=C1)C(C1=CC=C([O-])C=C1)(C(F)(F)F)C(F)(F)F	1
DTXSID00430848	2-hydroxy-4-(2,2,3,3,3-pentafluoropropoxy)benzoic Acid	651331-92-9	OC(=O)C1=C(O)C=C(OCC(F)(F)C(F)(F)F)C=C1	1
DTXSID00430904	1,2,3,4,5-Pentafluoro-6-(1,1,2,2,3,3,3-heptafluoropropyl)cyclohexane	918409-18-4	FC1C(F)C(F)C(C(F)C1F)C(F)(F)C(F)(F)C(F)(F)F	1
DTXSID00433253	2,2'-[Methylenebis(oxy)]bis[1,1,1,3,3,3-hexafluororopane	194039-81-1	FC(F)(F)C(OCOC(C(F)(F)F)C(F)(F)F)C(F)(F)F	1
DTXSID00437731	bis(2,3,3,3-tetrafluoro-2-(heptafluoropropoxy)-1-oxopropyl)peroxide	56347-79-6	FC(F)(F)C(F)(F)C(F)(F)OC(F)(C(=O)OOC(=O)C(F)(OC(F)(F)C(F)(F)C(F)(F)F)C(F)(F)F)C(F)(F)F	1	1
DTXSID00438405	8-azido-1,1,1,2,2,3,3,4,4,5,5,6,6-tridecafluorooctane	62571-55-5	FC(F)(F)C(F)(F)C(F)(F)C(F)(F)C(F)(F)C(F)(F)CCN=[N+]=[N-]	1	1
DTXSID00441939	5-(Nonafluorobutylsulfonylamino)-1,3,4-thiadiazole-2-sulfonamide	316826-66-1	NS(=O)(=O)C1=NN=C(NS(=O)(=O)C(F)(F)C(F)(F)C(F)(F)C(F)(F)F)S1	1
DTXSID00446247	2,2,3,3,4,4,5,5,6,6,7,7,7-Tridecafluoro-1,1-heptanediol	64739-16-8	OC(O)C(F)(F)C(F)(F)C(F)(F)C(F)(F)C(F)(F)C(F)(F)F	1	1
DTXSID00446989	Perfluoro-2-[(trifluoromethyl)sulfonyl]propane	207129-45-1	FC(F)(F)C(F)(C(F)(F)F)S(=O)(=O)C(F)(F)F	1
DTXSID00447673	Butanoic acid, 3,3,4,4,4-pentafluoro-, ethyl ester	106693-04-3	CCOC(=O)CC(F)(F)C(F)(F)F	1
DTXSID00448605	1,3,3,4,4,5,5,6,6-Nonafluoro-2-(pentafluoroethyl)cyclohexene	80308-96-9	FC1=C(C(F)(F)C(F)(F)F)C(F)(F)C(F)(F)C(F)(F)C1(F)F	1
DTXSID00448983	2-(4-Chloro-1,1,2,2,3,3,4,4-octafluorobutyl)-1H-pyrrole	110396-62-8	FC(F)(Cl)C(F)(F)C(F)(F)C(F)(F)C1=CC=CN1	1
DTXSID00449435	1,1,1,2,2,3,3-Heptafluoro-3-(1,1,2,2-tetrafluoro-2-iodoethoxy)propane	81747-61-7	FC(F)(F)C(F)(F)C(F)(F)OC(F)(F)C(F)(F)I	1
DTXSID00449713	2-Bromo-1,1,1,3,3,3-hexafluoropropane	2252-79-1	FC(F)(F)C(Br)C(F)(F)F	1
DTXSID00451977	2,2,3,3,4,4,5,5,6,6,7,7,8,8,8-Pentadecafluorooctyl trifluoromethanesulfonate	17352-09-9	FC(F)(F)C(F)(F)C(F)(F)C(F)(F)C(F)(F)C(F)(F)C(F)(F)COS(=O)(=O)C(F)(F)F	1	1
DTXSID00452227	1-Cyclohexene-1-carbonitrile, 2-amino-3,3,4,4,5,5-hexafluoro-6-imino-	90408-50-7	NC1=C(C#N)C(=N)C(F)(F)C(F)(F)C1(F)F	1
DTXSID00453592	Difluoro[1,1,2,2-tetrafluoro-2-(fluorosulfonyl)ethoxy]acetic acid	88986-29-2	OC(=O)C(F)(F)OC(F)(F)C(F)(F)S(F)(=O)=O	1
DTXSID00454443	Hexafluoro[2,2,2-trifluoro-1-(trifluoromethyl)ethylidene]cyclobutane	74693-96-2	FC(F)(F)C(=C1C(F)(F)C(F)(F)C1(F)F)C(F)(F)F	1
DTXSID00455910	5-Isoxazolol, 4,5-dihydro-3-phenyl-5-(1,1,2,2-tetrafluoroethyl)-	184293-63-8	OC1(CC(=NO1)C1=CC=CC=C1)C(F)(F)C(F)F	1
DTXSID00458188	Methyl 4-[[(nonafluorobutyl)sulfonyl]oxy]benzoate	41605-53-2	COC(=O)C1=CC=C(OS(=O)(=O)C(F)(F)C(F)(F)C(F)(F)C(F)(F)F)C=C1	1
DTXSID00458749	octafluorocyclopentanone	376-66-9	FC1(F)C(=O)C(F)(F)C(F)(F)C1(F)F	1
DTXSID00459211	6-Chloro-3,3,4,4,5,5,6,6-octafluorohexanoic acid	131118-32-6	OC(=O)CC(F)(F)C(F)(F)C(F)(F)C(F)(F)Cl	1
DTXSID0046511	Perflunafene	306-94-5	FC1(F)C(F)(F)C(F)(F)C2(F)C(F)(F)C(F)(F)C(F)(F)C(F)(F)C2(F)C1(F)F	1	1
DTXSID00468500	1,1-Di-(4-methoxyphenyl)-1-[4-(1H,1H,2H,2H-perfluorodecyl)phenyl]methyl chloride	865758-36-7	COC1=CC=C(C=C1)C(Cl)(C1=CC=C(CCC(F)(F)C(F)(F)C(F)(F)C(F)(F)C(F)(F)C(F)(F)C(F)(F)C(F)(F)F)C=C1)C1=CC=C(OC)C=C1	1	1
DTXSID00469991	1H-Perfluoro-1-heptene	75180-14-2	F\C=C(\F)C(F)(F)C(F)(F)C(F)(F)C(F)(F)C(F)(F)F	1	1
DTXSID00470300	2-(4-Ethylamino-phenyl)-1,1,1,3,3,3-hexafluoro-propan-2-ol	65797-85-5	CCNC1=CC=C(C=C1)C(O)(C(F)(F)F)C(F)(F)F	1
DTXSID00471251	Acetic acid, bromo-, 3,3,4,4,5,5,6,6,7,7,8,8,8-tridecafluorooctyl ester	132711-05-8	FC(F)(F)C(F)(F)C(F)(F)C(F)(F)C(F)(F)C(F)(F)CCOC(=O)CBr	1
DTXSID00471973	(Heptadecafluorooctyl)oxirane	52835-16-2	FC(F)(F)C(F)(F)C(F)(F)C(F)(F)C(F)(F)C(F)(F)C(F)(F)C(F)(F)C1CO1	1	1
DTXSID0047329	3-[5'-fluoro-2'-(2,2,3,3,3-pentafluoropropoxy)biphenyl-3-yl]-1H-1,2,4-triazole-5-carboxamide	852317-38-5	NC(=O)C1=NC(=NN1)C1=CC=CC(=C1)C1=CC(F)=CC=C1OCC(F)(F)C(F)(F)F	1
DTXSID0047583	Nonafluoro-1-iodobutane	423-39-2	FC(F)(F)C(F)(F)C(F)(F)C(F)(F)I	1	1
DTXSID00476100	1-Nitro-4-[3,3,3-trifluoro-2-(trifluoromethyl)-1-propenyl]benzene	403646-07-1	[O-][N+](=O)C1=CC=C(C=C(C(F)(F)F)C(F)(F)F)C=C1	1
DTXSID00476261	2-[(2,2,3,3,3-Pentafluoropropoxy)methyl]oxirane	706-89-8	FC(F)(F)C(F)(F)COCC1CO1	1
DTXSID00479232	diethyl 3,3,4,4,5,5,6,6,7,7,8,8,9,9,10,10,10-heptadecafluorodecylphosphonate	90146-96-6	CCOP(=O)(CCC(F)(F)C(F)(F)C(F)(F)C(F)(F)C(F)(F)C(F)(F)C(F)(F)C(F)(F)F)OCC	1	1
DTXSID00482064	1,1,2,2-tetrafluoroethyldiethylamine	680-63-7	CCN(CC)C(F)(F)C(F)F	1
DTXSID00485237	Phenol, 4-(heptafluoropropyl)-	61324-28-5	OC1=CC=C(C=C1)C(F)(F)C(F)(F)C(F)(F)F	1	1
DTXSID00490109	4-(Nonafluorobutoxy)aniline	62315-18-8	NC1=CC=C(OC(F)(F)C(F)(F)C(F)(F)C(F)(F)F)C=C1	1	1
DTXSID00500752	1-[(2,2,3,3,4,4,5,5,6,6,7,7-Dodecafluoroheptyl)oxy]-4-ethenylbenzene	64253-90-3	FC(F)C(F)(F)C(F)(F)C(F)(F)C(F)(F)C(F)(F)COC1=CC=C(C=C)C=C1	1
DTXSID00501188	2,3-Difluoro-2-(pentafluoroethyl)-3-(trifluoromethyl)oxirane	71917-15-2	FC(F)(F)C(F)(F)C1(F)OC1(F)C(F)(F)F	1
DTXSID00502135	1,1,1,3,3,3-Hexafluoro-2-isocyanatopropane	684-29-7	FC(F)(F)C(N=C=O)C(F)(F)F	1
DTXSID00502195	2,2,3-Trifluoro-3-(1,1,2,2-tetrafluoroethyl)oxirane	50838-64-7	FC(F)C(F)(F)C1(F)OC1(F)F	1
DTXSID00502610	2,2,3,3,4,4-Hexafluoro-4-iodobutanoyl fluoride	6044-18-4	FC(=O)C(F)(F)C(F)(F)C(F)(F)I	1
DTXSID00503405	2,2,3,3-Tetrafluorocyclopropane-1-carboxylic acid	344324-87-4	OC(=O)C1C(F)(F)C1(F)F	1
DTXSID00503607	(1,1,2,2,3,3,4,4,4-Nonafluorobutane-1-sulfonyl)acetonitrile	75988-02-2	FC(F)(F)C(F)(F)C(F)(F)C(F)(F)S(=O)(=O)CC#N	1
DTXSID00503960	2,2,3,3,4,4,5,5-Octafluoropentyl hypochlorite	76453-04-8	FC(F)C(F)(F)C(F)(F)C(F)(F)COCl	1
DTXSID00505883	4,4,5,5,5-Pentafluoro-2-(trifluoromethyl)pent-1-ene-1,3-dione	53352-88-8	FC(F)(F)C(=C=O)C(=O)C(F)(F)C(F)(F)F	1
DTXSID00507044	1-(3,5-Dibromophenyl)-2,2,3,3,4,4,4-heptafluorobutan-1-one	79851-20-0	FC(F)(F)C(F)(F)C(F)(F)C(=O)C1=CC(Br)=CC(Br)=C1	1	1
DTXSID00507266	Heptafluoro-2,3-dihydropyridine	51957-26-7	FC1=NC(F)(F)C(F)(F)C(F)=C1F	1
DTXSID00507665	2,2,3,3,4,4,5,5,6,6,7,7-Dodecafluoroheptyl sulfurochloridoite	254756-56-4	FC(F)C(F)(F)C(F)(F)C(F)(F)C(F)(F)C(F)(F)COS(Cl)=O	1
DTXSID00508475	1,1,1,2-Tetrafluoro-4-methyl-2-(trifluoromethyl)pentan-3-one	62656-72-8	CC(C)C(=O)C(F)(C(F)(F)F)C(F)(F)F	1	1
DTXSID00508894	1,1,3,4,4,5,5,5-Octafluoro-3-methoxy-2-(trifluoromethyl)pent-1-ene	79948-17-7	COC(F)(C(=C(F)F)C(F)(F)F)C(F)(F)C(F)(F)F	1
DTXSID00510795	N-Methyl-N-(2,2,3,3-tetrafluoropropyl)aniline	78727-06-7	CN(CC(F)(F)C(F)F)C1=CC=CC=C1	1
DTXSID00512037	Methyl 3-(heptadecafluorooctyl)benzoate	80791-11-3	COC(=O)C1=CC(=CC=C1)C(F)(F)C(F)(F)C(F)(F)C(F)(F)C(F)(F)C(F)(F)C(F)(F)C(F)(F)F	1	1
DTXSID00516671	2,2,3,3,4,4,5,5-Octafluoro-1,6-diphenylhexane-1,6-dione	2525-80-6	FC(F)(C(=O)C1=CC=CC=C1)C(F)(F)C(F)(F)C(F)(F)C(=O)C1=CC=CC=C1	1
DTXSID00519223	5-Chloro-1,3,3,4,4,6,6-heptafluoro-2-(trifluoromethyl)cyclohex-1-ene	87905-89-3	FC1=C(C(F)(F)F)C(F)(F)C(F)(F)C(Cl)C1(F)F	1
DTXSID00519228	Dimethyl [1,1,1-trifluoro-2-(trifluoromethyl)butan-2-yl]phosphonate	87579-47-3	CCC(C(F)(F)F)(C(F)(F)F)P(=O)(OC)OC	1
DTXSID00519723	N,N-Diethyl-4-methyl-2-(1,2,2,2-tetrafluoroethyl)-1,3-dioxan-2-amine	89752-26-1	CCN(CC)C1(OCCC(C)O1)C(F)C(F)(F)F	1
DTXSID00521321	1,1,2,2-Tetrafluoro-2-(1,1,2,2-tetrafluoroethoxy)ethane-1-sulfonyl chloride	88239-68-3	FC(F)C(F)(F)OC(F)(F)C(F)(F)S(Cl)(=O)=O	1
DTXSID00521821	Dodecyl 2,3,3,3-tetrafluoropropanoate	88239-58-1	CCCCCCCCCCCCOC(=O)C(F)C(F)(F)F	1
DTXSID00522414	5-Chloro-2,2,3,3,4,4,5,5-octafluoro-1-methoxypentan-1-ol	88332-85-8	COC(O)C(F)(F)C(F)(F)C(F)(F)C(F)(F)Cl	1
DTXSID00523385	3-[(Triethylsilyl)oxy]-4,4-bis(trifluoromethyl)cyclobut-2-en-1-one	89101-64-4	CC[Si](CC)(CC)OC1=CC(=O)C1(C(F)(F)F)C(F)(F)F	1
DTXSID00523502	2,3,4,5,6,6,7,7-Octafluorocyclohepta-2,4-dien-1-one	92406-76-3	FC1=C(F)C(=O)C(F)(F)C(F)(F)C(F)=C1F	1
DTXSID00524433	1,1'-(1,1,2,2,3,3-Hexafluoropropane-1,3-diyl)dibenzene	2647-96-3	FC(F)(C1=CC=CC=C1)C(F)(F)C(F)(F)C1=CC=CC=C1	1
DTXSID00524736	3-(Nonafluorobutyl)quinoxalin-2(1H)-one	89995-30-2	FC(F)(F)C(F)(F)C(F)(F)C(F)(F)C1=NC2=CC=CC=C2NC1=O	1
DTXSID00525001	Trimethyl(2,2,3,3,3-pentafluoropropoxy)silane	89660-59-3	C[Si](C)(C)OCC(F)(F)C(F)(F)F	1
DTXSID00525021	2-Bromo-1,1,2,3,3,4,5,6,7-nonafluoro-2,3-dihydro-1H-indene	88953-14-4	FC1=C(F)C(F)=C(F)C2=C1C(F)(F)C(F)(Br)C2(F)F	1
DTXSID00525026	Methyl 4,4,5,5,6,6,6-heptafluoro-3-oxohexanoate	89129-68-0	COC(=O)CC(=O)C(F)(F)C(F)(F)C(F)(F)F	1	1
DTXSID00526457	2,2,3,3,4,4,5,5,6,6,7,7,8,8,8-Pentadecafluoro-N-hydroxyoctanamide	15435-88-8	ONC(=O)C(F)(F)C(F)(F)C(F)(F)C(F)(F)C(F)(F)C(F)(F)C(F)(F)F	1	1
DTXSID00526477	1-[1,1,1,2,3,5,5,5-Octafluoro-4-(trifluoromethyl)pent-3-en-2-yl]pyrrolidine	89810-72-0	FC(=C(C(F)(F)F)C(F)(F)F)C(F)(N1CCCC1)C(F)(F)F	1
DTXSID00527449	3,3,4,4,5,5,6,6,7,7,8,8,8-Tridecafluoro-1-(phenylsulfanyl)octan-2-ol	89807-96-5	OC(CSC1=CC=CC=C1)C(F)(F)C(F)(F)C(F)(F)C(F)(F)C(F)(F)C(F)(F)F	1
DTXSID00528355	1,1'-(2,2,3,4,4,4-Hexafluorobutane-1,1-diyl)dibenzene	89185-52-4	FC(C(F)(F)F)C(F)(F)C(C1=CC=CC=C1)C1=CC=CC=C1	1
DTXSID00529463	N-Bromo-N-(pentafluoroethyl)hypobromous amide (non-preferred name)	83696-32-6	FC(F)(F)C(F)(F)N(Br)Br	1
DTXSID00529605	1-Methyl-4-[1-(phenylsulfanyl)-2-(1,1,2,2,3,3,4,4,5,5,6,6,6-tridecafluorohexane-1-sulfonyl)ethyl]benzene	89863-50-3	CC1=CC=C(C=C1)C(CS(=O)(=O)C(F)(F)C(F)(F)C(F)(F)C(F)(F)C(F)(F)C(F)(F)F)SC1=CC=CC=C1	1
DTXSID00530519	1-Bromo-4-chloro-1,1,2,2,3,3,4,4-octafluorobutane	89740-37-4	FC(F)(Cl)C(F)(F)C(F)(F)C(F)(F)Br	1
DTXSID00531243	4,5-Bis(pentafluoroethyl)-1,2,3,4,5-trithiadiazolidine	87985-86-2	FC(F)(F)C(F)(F)N1SSSN1C(F)(F)C(F)(F)F	1
DTXSID00531248	2,2-Dibromo-4,4,5,5-tetrafluoro-1,3-bis(trifluoromethyl)imidazolidine	91539-76-3	FC(F)(F)N1C(F)(F)C(F)(F)N(C(F)(F)F)C1(Br)Br	1
DTXSID00533681	2-[(2,2,3,3-Tetrafluoropropyl)sulfanyl]phenol	90314-95-7	OC1=CC=CC=C1SCC(F)(F)C(F)F	1
DTXSID00534794	4-(Heptadecafluorooctyl)-1H-pyrazole	92914-86-8	FC(F)(F)C(F)(F)C(F)(F)C(F)(F)C(F)(F)C(F)(F)C(F)(F)C(F)(F)C1=CNN=C1	1	1
DTXSID00535640	4,4,5,5,6,6,7,7,7-Nonafluoro-1-phenylheptan-3-one	90550-17-7	FC(F)(F)C(F)(F)C(F)(F)C(F)(F)C(=O)CCC1=CC=CC=C1	1
DTXSID00537669	1,1,1,2-Tetrafluoro-2-nitroethane	2967-10-4	[O-][N+](=O)C(F)C(F)(F)F	1
DTXSID00537806	1-(2-Bromo-1,1,1,3,3,3-hexafluoropropan-2-yl)-4-fluorobenzene	67715-98-4	FC1=CC=C(C=C1)C(Br)(C(F)(F)F)C(F)(F)F	1
DTXSID00537942	Triethoxy(2,2,3,3-tetrafluorocyclobutyl)silane	92818-39-8	CCO[Si](OCC)(OCC)C1CC(F)(F)C1(F)F	1
DTXSID00540951	3,3,4,5,5,5-Hexafluoro-2-methylpentan-2-ol	58380-92-0	CC(C)(O)C(F)(F)C(F)C(F)(F)F	1
DTXSID00542591	N,N-Dimethyl-1H,1H,7H-perfluoroheptanamine	104312-38-1	CN(C)CC(F)(F)C(F)(F)C(F)(F)C(F)(F)C(F)(F)C(F)F	1
DTXSID00542617	Perfluoro-2,5,8,11-tetraoxadodecane	64028-04-2	FC(F)(F)OC(F)(F)C(F)(F)OC(F)(F)C(F)(F)OC(F)(F)C(F)(F)OC(F)(F)F	1	1
DTXSID00544671	1,1,2,2,3,3,4,4-Octafluoro-1-[(1,1,1,2,3,3,3-heptafluoropropan-2-yl)oxy]-4-iodobutane	25080-17-5	FC(F)(F)C(F)(OC(F)(F)C(F)(F)C(F)(F)C(F)(F)I)C(F)(F)F	1	1
DTXSID00544914	Copper(1+) 1,1,2,2,3,3,4,4,4-nonafluorobutan-1-ide	124521-58-0	[Cu+].F[C-](F)C(F)(F)C(F)(F)C(F)(F)F	1
DTXSID00545628	1,1,2,2,3,3-Hexafluoro-1-iodopropane	58706-58-4	FC(F)C(F)(F)C(F)(F)I	1
DTXSID00546236	4,4,5,5,6,6-Hexafluorohex-2-ynoic acid	110680-66-5	OC(=O)C#CC(F)(F)C(F)(F)C(F)F	1
DTXSID00548578	2,2,3,3-Tetrafluorobicyclo[2.1.0]pentane	87102-50-9	FC1(F)C2CC2C1(F)F	1
DTXSID00548770	Ethyl 2,2,3,3,4-pentafluoro-4-oxobutanoate	63425-23-0	CCOC(=O)C(F)(F)C(F)(F)C(F)=O	1
DTXSID00551769	Methyl 3-(perfluorohexyl)propanoate	110260-75-8	COC(=O)CCC(F)(F)C(F)(F)C(F)(F)C(F)(F)C(F)(F)C(F)(F)F	1	1
DTXSID00552019	2,2,3,3,7,7,8,8-Octafluoro-1,4,6,9-tetraoxaspiro[4.4]nonane	92639-88-8	FC1(F)OC2(OC1(F)F)OC(F)(F)C(F)(F)O2	1
DTXSID00552276	1,1,2,2,3,3,4,4,5,5,6,6-Dodecafluoro-7-[(prop-2-en-1-yl)oxy]heptane	678-50-2	FC(F)C(F)(F)C(F)(F)C(F)(F)C(F)(F)C(F)(F)COCC=C	1
DTXSID00552711	[(1,1,2,2-Tetrafluoroethoxy)methyl]benzene	115611-57-9	FC(F)C(F)(F)OCC1=CC=CC=C1	1
DTXSID00553682	1,1,1,2,3,3-Hexafluoro-3-(trifluoromethoxy)-2-(trifluoromethyl)propane	110719-85-2	FC(F)(F)OC(F)(F)C(F)(C(F)(F)F)C(F)(F)F	1
DTXSID00554598	1,1,1,2,2-Pentafluoro-4-iodooctane	117539-28-3	CCCCC(I)CC(F)(F)C(F)(F)F	1
DTXSID00554634	4,4'-(1,1,1,3,3,3-Hexafluoropropane-2,2-diyl)di(benzene-1-thiol)	93129-79-4	FC(F)(F)C(C1=CC=C(S)C=C1)(C1=CC=C(S)C=C1)C(F)(F)F	1
DTXSID00557201	Heptyl 2,3,3,4,4,5,5,6,6,7,7,8,8,8-tetradecafluorooctanoate	118663-63-1	CCCCCCCOC(=O)C(F)C(F)(F)C(F)(F)C(F)(F)C(F)(F)C(F)(F)C(F)(F)F	1
DTXSID00558536	1,1,1,3,3,3-Hexafluoro-2-iodopropane	4141-91-7	FC(F)(F)C(I)C(F)(F)F	1
DTXSID00559083	5,5,6,6,7,7,8,8,9,9,10,10-Dodecafluorodec-1-yn-4-ol	124612-86-8	OC(CC#C)C(F)(F)C(F)(F)C(F)(F)C(F)(F)C(F)(F)C(F)F	1
DTXSID00559644	Octafluorobutane-1,4-disulfonyl difluoride	84246-31-1	FC(F)(C(F)(F)C(F)(F)S(F)(=O)=O)C(F)(F)S(F)(=O)=O	1
DTXSID00561101	1,1,1,4,5,5,5-Heptafluoro-2,3,4-tris(trifluoromethyl)pent-2-ene	90141-43-8	FC(F)(F)C(=C(C(F)(F)F)C(F)(C(F)(F)F)C(F)(F)F)C(F)(F)F	1
DTXSID00561166	1,1'-(1,1,1,3,3,3-Hexafluoropropane-2,2-diyl)bis(4-ethynylbenzene)	92455-16-8	FC(F)(F)C(C1=CC=C(C=C1)C#C)(C1=CC=C(C=C1)C#C)C(F)(F)F	1
DTXSID00561368	Methyl 3,4-dibromo-2,2,3,4,4-pentafluorobutanoate	124311-13-3	COC(=O)C(F)(F)C(F)(Br)C(F)(F)Br	1
DTXSID00563029	1,1,2,2,3,3,4,4,5,5,6,6-Dodecafluoro-1,6-dimethoxyhexane	132182-96-8	COC(F)(F)C(F)(F)C(F)(F)C(F)(F)C(F)(F)C(F)(F)OC	1
DTXSID00567042	(3,3,4,4,5,5,5-Heptafluoro-1-iodopentyl)(trimethyl)silane	89608-32-2	C[Si](C)(C)C(I)CC(F)(F)C(F)(F)C(F)(F)F	1	1
DTXSID00567047	4,4,5,5,6,6,6-Heptafluoro-2-iodohexan-1-ol	647-84-7	OCC(I)CC(F)(F)C(F)(F)C(F)(F)F	1	1
DTXSID00569248	3-(Heptadecafluorooctyl)benzene-1-sulfonyl chloride	104818-20-4	FC(F)(F)C(F)(F)C(F)(F)C(F)(F)C(F)(F)C(F)(F)C(F)(F)C(F)(F)C1=CC(=CC=C1)S(Cl)(=O)=O	1
DTXSID00569268	2,2-Dimethyl-1,3-bis(1,1,2,2-tetrafluoroethoxy)propane	757-15-3	CC(C)(COC(F)(F)C(F)F)COC(F)(F)C(F)F	1
DTXSID00569349	2-(Difluoromethyl)-1,1,1,3,3,3-hexafluoropropan-2-ol	138355-55-2	OC(C(F)F)(C(F)(F)F)C(F)(F)F	1
DTXSID00573007	1,1,1,2,2,3,3,4,4,5,5,6,6,7,7,8,8-Heptadecafluoro-12-iodododecane	38565-62-7	FC(F)(F)C(F)(F)C(F)(F)C(F)(F)C(F)(F)C(F)(F)C(F)(F)C(F)(F)CCCCI	1	1
DTXSID00573087	3,3,4,5,5,5-Hexafluoropentane-1,2-diol	121628-30-6	OCC(O)C(F)(F)C(F)C(F)(F)F	1
DTXSID00573643	4,4,5,5,6,6-Hexafluoro-2,8-diiodononane-1,9-diol	1842-23-5	OCC(I)CC(F)(F)C(F)(F)C(F)(F)CC(I)CO	1
DTXSID00573789	1-(Chlorosulfanyl)-1,1,2,2,2-pentafluoroethane	39937-11-6	FC(F)(F)C(F)(F)SCl	1
DTXSID00575041	Methyl 3-[(heptafluoropropyl)sulfanyl]benzoate	88489-61-6	COC(=O)C1=CC(SC(F)(F)C(F)(F)C(F)(F)F)=CC=C1	1
DTXSID00575046	4-(1,1,2,2,3,3,3-Heptafluoropropane-1-sulfonyl)benzoic acid	88489-80-9	OC(=O)C1=CC=C(C=C1)S(=O)(=O)C(F)(F)C(F)(F)C(F)(F)F	1
DTXSID00575182	1-(4-Chloro-1,1,2,2,3,3,4,4-octafluorobutyl)-3-nitrobenzene	93620-85-0	[O-][N+](=O)C1=CC=CC(=C1)C(F)(F)C(F)(F)C(F)(F)C(F)(F)Cl	1
DTXSID00578456	Triethoxy(3,3,4,4,5,5,6,6,7,7,7-undecafluoroheptyl)silane	190579-86-3	CCO[Si](CCC(F)(F)C(F)(F)C(F)(F)C(F)(F)C(F)(F)F)(OCC)OCC	1
DTXSID00578936	Methyl perfluoropentyl ketone	2708-07-8	CC(=O)C(F)(F)C(F)(F)C(F)(F)C(F)(F)C(F)(F)F	1	1
DTXSID00580271	1,1,2,2-Tetrafluoro-2-(1,2,2,2-tetrafluoroethoxy)ethane-1-sulfonyl fluoride	446312-61-4	FC(OC(F)(F)C(F)(F)S(F)(=O)=O)C(F)(F)F	1
DTXSID00583368	1-[4-(3,3,4,4,5,5,6,6,7,7,8,8,9,9,10,10,10-Heptadecafluorodecyl)phenyl]methanamine	609816-23-1	NCC1=CC=C(CCC(F)(F)C(F)(F)C(F)(F)C(F)(F)C(F)(F)C(F)(F)C(F)(F)C(F)(F)F)C=C1	1	1
DTXSID00583424	(3,3,4,4,5,5,6,6,6-Nonafluorohexyl)di(propan-2-yl)silane	356056-13-8	CC(C)[SiH](CCC(F)(F)C(F)(F)C(F)(F)C(F)(F)F)C(C)C	1	1
DTXSID00583621	Hexafluoropropene Trimer	6792-31-0	FC(=C(C(F)(F)F)C(F)(C(F)(F)F)C(F)(F)F)C(F)(C(F)(F)F)C(F)(F)F	1	1
DTXSID00583641	1-Ethyl-3-methyl-1H-imidazol-3-ium bis(pentafluoroethanesulfonyl)azanide	216299-76-2	CCN1C=C[N+](C)=C1.FC(F)(F)C(F)(F)S(=O)(=O)[N-]S(=O)(=O)C(F)(F)C(F)(F)F	1
DTXSID00584835	1-(Chloro[4-(2-(perfluorooctyl)ethyl)phenyl]phenylmethyl)-4-methoxybenzene	865758-37-8	COC1=CC=C(C=C1)C(Cl)(C1=CC=CC=C1)C1=CC=C(CCC(F)(F)C(F)(F)C(F)(F)C(F)(F)C(F)(F)C(F)(F)C(F)(F)C(F)(F)F)C=C1	1	1
DTXSID00585029	3-Butyl-1-((perfluorohexyl)eth-2-yl)-1H-imidazol-3-ium hexafluorophosphate	313475-52-4	F[P-](F)(F)(F)(F)F.CCCC[N+]1=CN(CCC(F)(F)C(F)(F)C(F)(F)C(F)(F)C(F)(F)C(F)(F)F)C=C1	1	1
DTXSID00585307	2,2'-(3,3,4,4,5,5-Hexafluorocyclopent-1-ene-1,2-diyl)dithiophene	566929-27-9	FC1(F)C(C2=CC=CS2)=C(C2=CC=CS2)C(F)(F)C1(F)F	1
DTXSID00587124	4,4-Bis(trifluoromethyl)-3-[(trimethylgermyl)oxy]cyclobut-2-en-1-one	89101-65-5	C[Ge](C)(C)OC1=CC(=O)C1(C(F)(F)F)C(F)(F)F	1
DTXSID00596453	1,1-Dichloro-1,2,2,3,3,4,4,4-octafluorobutane	355-23-7	FC(F)(F)C(F)(F)C(F)(F)C(F)(Cl)Cl	1
DTXSID00597844	2,2,3,3-Tetrafluorobutanoic acid	917951-61-2	CC(F)(F)C(F)(F)C(O)=O	1
DTXSID0059794	Perfluorooctane	307-34-6	FC(F)(F)C(F)(F)C(F)(F)C(F)(F)C(F)(F)C(F)(F)C(F)(F)C(F)(F)F	1	1
DTXSID0059798	1H,1H,11H-Eicosafluoro-1-undecanol	307-70-0	OCC(F)(F)C(F)(F)C(F)(F)C(F)(F)C(F)(F)C(F)(F)C(F)(F)C(F)(F)C(F)(F)C(F)F	1	1
DTXSID00598553	1,2,2,3,3,4,4,4a,5,5,6,6,7,7,8,8,8a-Heptadecafluorodecahydronaphthalene-1-carboxylic acid	172155-05-4	OC(=O)C1(F)C(F)(F)C(F)(F)C(F)(F)C2(F)C(F)(F)C(F)(F)C(F)(F)C(F)(F)C12F	1
DTXSID0059871	Pentafluoropropionamide	354-76-7	NC(=O)C(F)(F)C(F)(F)F	1
DTXSID0059873	Pentafluoro ethanesulfonyl fluoride	354-87-0	FC(F)(F)C(F)(F)S(F)(=O)=O	1
DTXSID0059875	Undecafluorocyclohexanesulphonyl fluoride	355-03-3	FC1(F)C(F)(F)C(F)(F)C(F)(C(F)(F)C1(F)F)S(F)(=O)=O	1	1
DTXSID0059877	Perfluorohexanoyl fluoride	355-38-4	FC(=O)C(F)(F)C(F)(F)C(F)(F)C(F)(F)C(F)(F)F	1	1
DTXSID00598770	2-Bromo-1,1,1,2,3,3-hexafluoro-3-[(trifluoroethenyl)oxy]propane	113772-72-8	FC(F)=C(F)OC(F)(F)C(F)(Br)C(F)(F)F	1
DTXSID00598775	4-(1,1,1,3,3,3-Hexafluoropropan-2-yl)phenol	63780-72-3	OC1=CC=C(C=C1)C(C(F)(F)F)C(F)(F)F	1
DTXSID0059879	1H,1H,5H-Perfluoropentanol	355-80-6	OCC(F)(F)C(F)(F)C(F)(F)C(F)F	1	1
DTXSID00600246	2-(2,2,3,3-Tetrafluoropropoxy)ethan-1-ol	50997-68-7	OCCOCC(F)(F)C(F)F	1
DTXSID00600903	4,4,5,5,5-Pentafluoropent-1-ene	135671-20-4	FC(F)(F)C(F)(F)CC=C	1
DTXSID00605074	2-(2-Chloro-1,1,2-trifluoroethoxy)-1,1,1,2-tetrafluoroethane	51410-31-2	FC(Cl)C(F)(F)OC(F)C(F)(F)F	1
DTXSID0060985	Hexafluoroglutaryl chloride	678-77-3	FC(F)(C(Cl)=O)C(F)(F)C(F)(F)C(Cl)=O	1	1
DTXSID0061038	1,2-Dichlorohexafluorocyclopentene	706-79-6	FC1(F)C(Cl)=C(Cl)C(F)(F)C1(F)F	1
DTXSID00610941	3,3,4-Trifluoro-4-(heptafluoropropoxy)tricyclo[4.2.1.0~2,5~]non-7-ene	262617-19-6	[H]C12CC([H])(C=C1)C1C2C(F)(F)C1(F)OC(F)(F)C(F)(F)C(F)(F)F	1	1
DTXSID00611211	2,2'-(2,2,3,3-Tetrafluorobutane-1,4-diyl)bis(oxirane)	194877-37-7	FC(F)(CC1CO1)C(F)(F)CC1CO1	1
DTXSID00611519	4-(Undecafluoropentyl)benzoic acid	25533-93-1	OC(=O)C1=CC=C(C=C1)C(F)(F)C(F)(F)C(F)(F)C(F)(F)C(F)(F)F	1
DTXSID00612960	4-(Azidomethyl)-2,2-bis(trifluoromethyl)-1,3-dioxolane	51125-51-0	FC(F)(F)C1(OCC(CN=[N+]=[N-])O1)C(F)(F)F	1
DTXSID00613735	3-[(1,1,1,3,3,3-Hexafluoropropan-2-yl)oxy]prop-1-ene	150771-44-1	FC(F)(F)C(OCC=C)C(F)(F)F	1
DTXSID00617536	Phenyl(1,1,2,2-tetrafluoroethyl)phosphane	350-58-3	FC(F)C(F)(F)PC1=CC=CC=C1	1
DTXSID00617692	2,2,3,3,3-Pentafluoro-1-(10H-phenothiazin-10-yl)propan-1-one	141135-78-6	FC(F)(F)C(F)(F)C(=O)N1C2=CC=CC=C2SC2=CC=CC=C12	1
DTXSID0061826	Perfluoropropyl trifluorovinyl ether	1623-05-8	FC(F)=C(F)OC(F)(F)C(F)(F)C(F)(F)F	1	1
DTXSID00618548	3-(2-Chloro-1,1,2-trifluoroethoxy)-2,2,3,3-tetrafluoropropanenitrile	51579-45-4	FC(Cl)C(F)(F)OC(F)(F)C(F)(F)C#N	1
DTXSID00620126	1,1,2,2,3,3-Hexafluorocyclobutane	55101-70-7	FC1(F)CC(F)(F)C1(F)F	1
DTXSID00620545	N,N-dimethyl-2H-perfluoroethanamine	1550-50-1	CN(C)C(F)(F)C(F)F	1
DTXSID00621037	Tetrabutylphosphanium trifluoro[tris(pentafluoroethyl)]phosphate(1-)	482635-81-4	CCCC[P+](CCCC)(CCCC)CCCC.FC(F)(F)C(F)(F)[P-](F)(F)(F)(C(F)(F)C(F)(F)F)C(F)(F)C(F)(F)F	1
DTXSID00621512	3-[(2,2,3,3,4,4,4-Heptafluorobutoxy)methyl]-3-methyloxetane	156294-55-2	CC1(COCC(F)(F)C(F)(F)C(F)(F)F)COC1	1	1
DTXSID00622963	N-Butylperfluorooctane-1-sulfonamide	31506-34-0	CCCCNS(=O)(=O)C(F)(F)C(F)(F)C(F)(F)C(F)(F)C(F)(F)C(F)(F)C(F)(F)C(F)(F)F	1	1
DTXSID00623137	Nonadecafluorononan-1-ol	85758-72-1	OC(F)(F)C(F)(F)C(F)(F)C(F)(F)C(F)(F)C(F)(F)C(F)(F)C(F)(F)C(F)(F)F	1
DTXSID00623819	1,1,1,2,2,3,3,4,4,5,5,6,6-Tridecafluoro-6-[(trifluoroethenyl)oxy]hexane	103489-99-2	FC(F)=C(F)OC(F)(F)C(F)(F)C(F)(F)C(F)(F)C(F)(F)C(F)(F)F	1
DTXSID00624967	1,1,1,2,2,3,3,4,4,5-Decafluoropentane	51000-94-3	FCC(F)(F)C(F)(F)C(F)(F)C(F)(F)F	1
DTXSID00625237	1,1,2,2,3,3,4-Heptafluoro-4-iodobutane	90015-83-1	FC(F)C(F)(F)C(F)(F)C(F)I	1
DTXSID00625853	4,4'-Bis(2-bromo-1,1,2,2-tetrafluoroethoxy)-1,1'-biphenyl	134130-29-3	FC(F)(Br)C(F)(F)OC1=CC=C(C=C1)C1=CC=C(OC(F)(F)C(F)(F)Br)C=C1	1
DTXSID00627110	12,12,13,13,14,14,15,15,15-Nonafluoropentadecan-1-ol	36096-97-6	OCCCCCCCCCCCC(F)(F)C(F)(F)C(F)(F)C(F)(F)F	1	1
DTXSID00627413	3,3,4,4,5,5,6,6,7,7,8,8,9,9,10,10,10-Heptadecafluorodecyl 2-fluoroprop-2-enoate	96250-52-1	FC(=C)C(=O)OCCC(F)(F)C(F)(F)C(F)(F)C(F)(F)C(F)(F)C(F)(F)C(F)(F)C(F)(F)F	1	1
DTXSID00631136	(3,3,4,4,5,5,6,6,7,7,8,8,9,9,10,10,10-Heptadecafluorodecyl)(tripropoxy)silane	521084-64-0	CCCO[Si](CCC(F)(F)C(F)(F)C(F)(F)C(F)(F)C(F)(F)C(F)(F)C(F)(F)C(F)(F)F)(OCCC)OCCC	1	1
DTXSID00631272	1,1,1,2,2,3,3,4,4,5,5,6,6,8,8-Pentadecafluoro-8-iodooctane	53826-16-7	FC(F)(F)C(F)(F)C(F)(F)C(F)(F)C(F)(F)C(F)(F)CC(F)(F)I	1	1
DTXSID00631333	1,1,1,3,5,5,5-Heptafluoro-4-(trifluoromethyl)pent-2-ene	13088-26-1	FC(=CC(F)(F)F)C(C(F)(F)F)C(F)(F)F	1
DTXSID00631393	Dodecafluorooctanedioyl difluoride	24647-09-4	FC(=O)C(F)(F)C(F)(F)C(F)(F)C(F)(F)C(F)(F)C(F)(F)C(F)=O	1
DTXSID00631434	3,5,5,5-Tetrafluoro-2-methyl-4-(trifluoromethyl)pent-2-ene	62116-47-6	CC(C)=C(F)C(C(F)(F)F)C(F)(F)F	1
DTXSID00631439	(1Z)-1,2-Dibromo-3,3,4,4,5,5,6,6,7,7,8,8,8-tridecafluorooct-1-ene	59665-28-0	FC(F)(F)C(F)(F)C(F)(F)C(F)(F)C(F)(F)C(F)(F)C(\Br)=C\Br	1	1
DTXSID00631454	Trimethyl{[3,3,3-trifluoro-2-(trifluoromethyl)prop-1-en-1-yl]oxy}silane	857899-86-6	C[Si](C)(C)OC=C(C(F)(F)F)C(F)(F)F	1
DTXSID00631792	Dichloro(1,1,1,2,3,3-hexafluoropropan-2-yl)methylsilane	62281-32-7	C[Si](Cl)(Cl)C(F)(C(F)F)C(F)(F)F	1
DTXSID00631919	4,4,5,5,5-Pentafluoro-2-(trifluoromethyl)pentanal	90278-13-0	FC(F)(F)C(CC(F)(F)C(F)(F)F)C=O	1
DTXSID00631939	N,N-Diethyl-4,4,5,5,5-pentafluoro-2-(trifluoromethyl)pentanamide	90278-12-9	CCN(CC)C(=O)C(CC(F)(F)C(F)(F)F)C(F)(F)F	1
DTXSID00631979	1-(2,2-Difluoro-2-nitroethoxy)-1,1,2,3,3,3-hexafluoropropane	65064-79-1	[O-][N+](=O)C(F)(F)COC(F)(F)C(F)C(F)(F)F	1
DTXSID0063232	1,3-Bis(1,1,2,2-tetrafluoroethoxy)benzene	3914-19-0	FC(F)C(F)(F)OC1=CC(OC(F)(F)C(F)F)=CC=C1	1
DTXSID00632764	2,2,3,3-Tetrafluoro-3-sulfopropanoic acid	83071-04-9	OC(=O)C(F)(F)C(F)(F)S(O)(=O)=O	1
DTXSID00633413	3,3,3-Trifluoro-2,2-bis(trifluoromethyl)propanoic acid	917951-63-4	OC(=O)C(C(F)(F)F)(C(F)(F)F)C(F)(F)F	1
DTXSID00634006	1-Ethoxy-1,1,2,2,3,3,4,4,5,5,5-undecafluoropentane	181214-75-5	CCOC(F)(F)C(F)(F)C(F)(F)C(F)(F)C(F)(F)F	1	1
DTXSID00634748	2-[4-(Bromomethyl)phenyl]-1,1,1,3,3,3-hexafluoropropan-2-ol	202134-57-4	OC(C1=CC=C(CBr)C=C1)(C(F)(F)F)C(F)(F)F	1
DTXSID00635255	2-Fluoro-4-(nonafluorobutyl)aniline	821791-47-3	NC1=C(F)C=C(C=C1)C(F)(F)C(F)(F)C(F)(F)C(F)(F)F	1	1
DTXSID00648744	Sodium tris(1,1,1,3,3,3-hexafluoropropan-2-olato-kappaO)(hydrido)borate(1-)	139494-68-1	[Na+].FC(F)(F)C(O[B-](OC(C(F)(F)F)C(F)(F)F)OC(C(F)(F)F)C(F)(F)F)C(F)(F)F	1
DTXSID00650428	1-(2-Bromo-1,1,1,3,3,3-hexafluoropropan-2-yl)-2-methoxybenzene	70430-22-7	COC1=CC=CC=C1C(Br)(C(F)(F)F)C(F)(F)F	1
DTXSID00654244	(4-Chlorophenyl)[4-(1,1,2,2-tetrafluoroethoxy)phenyl]methanone	334931-09-8	FC(F)C(F)(F)OC1=CC=C(C=C1)C(=O)C1=CC=C(Cl)C=C1	1
DTXSID0065931	2,2,3,3,4,4,5,5,6,6,7,8,8,8-Tetradecafluoro-7-(trifluoromethyl)octyl fluoride	15742-62-8	FC(=O)C(F)(F)C(F)(F)C(F)(F)C(F)(F)C(F)(F)C(F)(C(F)(F)F)C(F)(F)F	1	1
DTXSID00660148	2-[Bromo(chloro)methyl]-1,1,1,3,3,3-hexafluoropropane	885276-24-4	FC(F)(F)C(C(Cl)Br)C(F)(F)F	1
DTXSID0066296	Decafluoro-5-(trifluoromethyl)hexanoyl fluoride	18017-31-7	FC(=O)C(F)(F)C(F)(F)C(F)(F)C(F)(C(F)(F)F)C(F)(F)F	1	1
DTXSID00663078	1,1,2,2,3,3-Hexafluoro-1-(trifluoromethoxy)propane	67490-36-2	FC(F)C(F)(F)C(F)(F)OC(F)(F)F	1	1
DTXSID00663093	1-Bromo-2-(1,1,2,3,3,3-hexafluoropropoxy)benzene	52328-77-5	FC(C(F)(F)F)C(F)(F)OC1=CC=CC=C1Br	1
DTXSID00663114	Perfluorodecanoic anhydride	942199-24-8	FC(F)(F)C(F)(F)C(F)(F)C(F)(F)C(F)(F)C(F)(F)C(F)(F)C(F)(F)C(F)(F)C(=O)OC(=O)C(F)(F)C(F)(F)C(F)(F)C(F)(F)C(F)(F)C(F)(F)C(F)(F)C(F)(F)C(F)(F)F	1	1
DTXSID0067054	Phenol, 4,4'-[2,2,2-trifluoro-1-(trifluoromethyl)ethylidene]bis-, dipotassium salt	25088-69-1	[K+].[K+].[O-]C1=CC=C(C=C1)C(C1=CC=C([O-])C=C1)(C(F)(F)F)C(F)(F)F	1
DTXSID00672862	3-Chloro-1,1,3,5,5-pentamethyl-1,5-bis(3,3,4,4,5,5,6,6,7,7,8,8,8-tridecafluorooctyl)trisiloxane	521069-01-2	C[Si](C)(CCC(F)(F)C(F)(F)C(F)(F)C(F)(F)C(F)(F)C(F)(F)F)O[Si](C)(Cl)O[Si](C)(C)CCC(F)(F)C(F)(F)C(F)(F)C(F)(F)C(F)(F)C(F)(F)F	1	1
DTXSID0067846	N-Ethyl-1,1,2,2,3,3,4,4,4-nonafluoro-N-(2-hydroxyethyl)butane-1-sulphonamide	34449-89-3	CCN(CCO)S(=O)(=O)C(F)(F)C(F)(F)C(F)(F)C(F)(F)F	1	1
DTXSID0067848	2-(N-(Perfluorobutylsulfonyl)-N-methylamino)ethanol	34454-97-2	CN(CCO)S(=O)(=O)C(F)(F)C(F)(F)C(F)(F)C(F)(F)F	1	1
DTXSID00681090	(3,3,4,4,5,5,5-Heptafluoropentyl)(trimethoxy)silane	109134-39-6	CO[Si](CCC(F)(F)C(F)(F)C(F)(F)F)(OC)OC	1	1
DTXSID0068523	2-[Methyl[(perfluorohexyl)ethylsulfonyl]amino]ethyl 2-propenoate	49859-70-3	CN(CCOC(=O)C=C)S(=O)(=O)CCC(F)(F)C(F)(F)C(F)(F)C(F)(F)C(F)(F)C(F)(F)F	1	1
DTXSID0069042	Morpholine, 2,2,3,3,5,5,6,6-octafluoro-4-(pentafluoroethyl)-	55716-11-5	FC(F)(F)C(F)(F)N1C(F)(F)C(F)(F)OC(F)(F)C1(F)F	1	1
DTXSID00696427	1,1,1,2,3,3-Hexafluoropropan-2-yl but-2-enoate	135771-94-7	CC=CC(=O)OC(F)(C(F)F)C(F)(F)F	1
DTXSID00696689	2,3,4,4,5,5,5-Heptafluoropent-2-enoic acid	103229-91-0	OC(=O)C(F)=C(F)C(F)(F)C(F)(F)F	1
DTXSID00698325	(2-Perfluorooctylethyl)isopropoxycarbonyloxyiminophenylacetonitrile	350716-42-6	CC(C)(CCC(F)(F)C(F)(F)C(F)(F)C(F)(F)C(F)(F)C(F)(F)C(F)(F)C(F)(F)F)OC(=O)ON=C(C#N)C1=CC=CC=C1	1	1
DTXSID00698623	3,3,4,4-Tetrafluoro-2-methylbut-1-ene	57252-78-5	CC(=C)C(F)(F)C(F)F	1
DTXSID00701000	N~1~,N~1~-Bis(1,3-dihydroxy-2-methylpropan-2-yl)-2,2,3,3-tetrafluorobutanediamide	5246-95-7	CC(CO)(CO)N(C(=O)C(F)(F)C(F)(F)C(N)=O)C(C)(CO)CO	1
DTXSID00702219	4-Chloro-3,3,4,4-tetrafluoro-1-iodobut-1-ene	150223-07-7	FC(F)(Cl)C(F)(F)C=CI	1
DTXSID00706191	(4,4,5,5,6,6,7,7,7-Nonafluorohept-1-en-1-yl)benzene	664326-37-8	FC(F)(F)C(F)(F)C(F)(F)C(F)(F)CC=CC1=CC=CC=C1	1
DTXSID00707966	1,1,1,2,2,3,3,4,4,5,5,6,6-Tridecafluorooctadec-7-ene	131851-05-3	CCCCCCCCCCC=CC(F)(F)C(F)(F)C(F)(F)C(F)(F)C(F)(F)C(F)(F)F	1
DTXSID0070869	2-(Ethyl((nonafluorobutyl)sulphonyl)amino)ethyl methacrylate	67939-33-7	CCN(CCOC(=O)C(C)=C)S(=O)(=O)C(F)(F)C(F)(F)C(F)(F)C(F)(F)F	1	1
DTXSID00709107	Pentafluoropropaneperoxoic acid	159219-31-5	OOC(=O)C(F)(F)C(F)(F)F	1
DTXSID00710415	(4-Fluorophenyl)[4-(1,1,2,3,3,3-hexafluoropropoxy)phenyl]methanone	143526-19-6	FC(C(F)(F)F)C(F)(F)OC1=CC=C(C=C1)C(=O)C1=CC=C(F)C=C1	1
DTXSID0071047	Perfluoro-13-methyltetradecanoic acid compd. with ethanamine	68052-68-6	CC[NH3+].[O-]C(=O)C(F)(F)C(F)(F)C(F)(F)C(F)(F)C(F)(F)C(F)(F)C(F)(F)C(F)(F)C(F)(F)C(F)(F)C(F)(F)C(F)(C(F)(F)F)C(F)(F)F	1	1
DTXSID00711088	1-Bromo-3-(pentafluoroethyl)benzene	18739-03-2	FC(F)(F)C(F)(F)C1=CC(Br)=CC=C1	1
DTXSID00711149	1,1,2,2,3,3-Hexafluoro-1-[(propan-2-yl)oxy]propane	393517-66-3	CC(C)OC(F)(F)C(F)(F)C(F)F	1
DTXSID00711184	1,2,3,3,3-Pentafluoro-1-methoxyprop-1-ene	666-92-2	COC(F)=C(F)C(F)(F)F	1
DTXSID00712515	(3Z)-1,1,1,7,7,7-Hexafluoro-2,6-bis(trifluoromethyl)hept-3-ene-2,6-diol	16202-98-5	OC(C\C=C/C(O)(C(F)(F)F)C(F)(F)F)(C(F)(F)F)C(F)(F)F	1
DTXSID0071332	N-(4-Hydroxybutyl)-N-methylperfluorooctanesulfonamide	68239-73-6	CN(CCCCO)S(=O)(=O)C(F)(F)C(F)(F)C(F)(F)C(F)(F)C(F)(F)C(F)(F)C(F)(F)C(F)(F)F	1	1
DTXSID0071334	N-Ethyl-1,1,2,2,3,3,4,4,5,5,6,6,7,7,7-pentadecafluoro-N-(3-(trimethoxysilyl)propyl)heptane-1-sulphonamide	68239-75-8	CCN(CCC[Si](OC)(OC)OC)S(=O)(=O)C(F)(F)C(F)(F)C(F)(F)C(F)(F)C(F)(F)C(F)(F)C(F)(F)F	1	1
DTXSID00713527	Pentafluoropropanoic acid--piperazine (1/1)	1690-94-4	C1CNCCN1.OC(=O)C(F)(F)C(F)(F)F	1
DTXSID00718315	Potassium trifluoro(pentafluoroethyl)borate(1-)	476639-90-4	[K+].F[B-](F)(F)C(F)(F)C(F)(F)F	1
DTXSID0071889	N-Ethyl-N-((tridecafluorohexyl)sulfonyl)glycine	68957-32-4	CCN(CC(O)=O)S(=O)(=O)C(F)(F)C(F)(F)C(F)(F)C(F)(F)C(F)(F)C(F)(F)F	1	1
DTXSID0072352	Piperidinium perfluorooctanesulfonate	71463-74-6	C1CC[NH2+]CC1.[O-]S(=O)(=O)C(F)(F)C(F)(F)C(F)(F)C(F)(F)C(F)(F)C(F)(F)C(F)(F)C(F)(F)F	1	1
DTXSID0072354	(3-(Ethyl((pentadecafluoroheptyl)sulfonyl)amino)propyl)-Phosphonic acid	71463-79-1	CCN(CCCP(O)(O)=O)S(=O)(=O)C(F)(F)C(F)(F)C(F)(F)C(F)(F)C(F)(F)C(F)(F)C(F)(F)F	1	1
DTXSID0072356	Phosphonic acid, (3-(ethyl((pentadecafluoroheptyl)sulfonyl)amino)propyl)-, diethyl ester	71463-81-5	CCOP(=O)(CCCN(CC)S(=O)(=O)C(F)(F)C(F)(F)C(F)(F)C(F)(F)C(F)(F)C(F)(F)C(F)(F)F)OCC	1	1
DTXSID00725105	1,1,2,2-Tetrafluoro-3-[tris(2,2,3,3-tetrafluoropropoxy)methoxy]propane	2409-18-9	FC(F)C(F)(F)COC(OCC(F)(F)C(F)F)(OCC(F)(F)C(F)F)OCC(F)(F)C(F)F	1
DTXSID0072772	N-[3-(Dimethylamino)propyl]-perfluoro-1-hexanesulfonamide acetate	73772-33-5	CC(O)=O.CN(C)CCCNS(=O)(=O)C(F)(F)C(F)(F)C(F)(F)C(F)(F)C(F)(F)C(F)(F)F	1	1
DTXSID0073118	Ethyl perfluorobutyl ether	163702-05-4	CCOC(F)(F)C(F)(F)C(F)(F)C(F)(F)F	1	1
DTXSID0073168	Methyl 3,3,3-trifluoro-2-(trifluoromethyl)propionate	360-54-3	COC(=O)C(C(F)(F)F)C(F)(F)F	1
DTXSID0073249	[2,2,2-Trifluoro-1-(trifluoromethyl)ethylidene]propanedinitrile	1113-69-5	FC(F)(F)C(=C(C#N)C#N)C(F)(F)F	1
DTXSID0073900	1H,4H-Octafluorobutane	377-36-6	FC(F)C(F)(F)C(F)(F)C(F)F	1
DTXSID0073904	1-Chloro-1,1,2,2-tetrafluoropropane	421-75-0	CC(F)(F)C(F)(F)Cl	1
DTXSID0073906	1-Chloro-1,1,2,2,3,3-hexafluoropropane	422-55-9	FC(F)C(F)(F)C(F)(F)Cl	1
DTXSID0074059	Difluoromethyl 1H,1H-perfluoropropyl ether	56860-81-2	FC(F)OCC(F)(F)C(F)(F)F	1
DTXSID0074130	Pentafluoroethylperoxy	147703-39-7	[O]OC(F)(F)C(F)(F)F	1
DTXSID00748238	1,1,1,3,3-Pentafluoro-3-(1,2,2,2-tetrafluoroethoxy)propan-2-one	88457-11-8	FC(OC(F)(F)C(=O)C(F)(F)F)C(F)(F)F	1
DTXSID00750730	Methyl 4-(undecafluoropentyl)benzoate	88951-01-3	COC(=O)C1=CC=C(C=C1)C(F)(F)C(F)(F)C(F)(F)C(F)(F)C(F)(F)F	1
DTXSID00750735	4-Cyanophenyl 4-(pentadecafluoroheptyl)benzoate	88951-07-9	FC(F)(F)C(F)(F)C(F)(F)C(F)(F)C(F)(F)C(F)(F)C(F)(F)C1=CC=C(C=C1)C(=O)OC1=CC=C(C=C1)C#N	1
DTXSID00752173	1,1,1,2,2-Pentafluorooct-4-en-3-one	89176-01-2	CCCC=CC(=O)C(F)(F)C(F)(F)F	1
DTXSID00752178	1,1,1,2,2-Pentafluoroocta-4,6-dien-3-one	89176-06-7	CC=CC=CC(=O)C(F)(F)C(F)(F)F	1
DTXSID0075237	3,3,3-Trifluoro-2-(trifluoromethyl)propanoyl fluoride	382-22-9	FC(=O)C(C(F)(F)F)C(F)(F)F	1
DTXSID00753084	3-Chloro-1,1,2,2,3,3-hexafluoropropan-1-ol	89308-01-0	OC(F)(F)C(F)(F)C(F)(F)Cl	1
DTXSID00754314	N-Bromo-2,2,3,3,3-pentafluoropropanimidoyl fluoride	89554-91-6	FC(=NBr)C(F)(F)C(F)(F)F	1
DTXSID00757002	1,2,2,2-Tetrafluoroethane-1-sulfonic acid--pyridine (1/1)	91145-99-2	C1=CC=NC=C1.OS(=O)(=O)C(F)C(F)(F)F	1
DTXSID00757522	5,5,6,6-Tetrafluoro-4-sulfanylhex-3-en-2-one	91888-59-4	CC(=O)C=C(S)C(F)(F)C(F)F	1
DTXSID00758594	2-Bromo-3-(bromomethyl)-4,4,5,5,6,6,6-heptafluorohexan-3-ol	93339-87-8	CC(Br)C(O)(CBr)C(F)(F)C(F)(F)C(F)(F)F	1	1
DTXSID00758852	1,1,1,2,4,4,5,5-Octafluoro-5-iodo-2-(trifluoromethyl)pentan-3-one	93822-96-9	FC(F)(F)C(F)(C(=O)C(F)(F)C(F)(F)I)C(F)(F)F	1	1
DTXSID00758933	1,2,2,3,4,4-Hexafluorobicyclo[1.1.0]butane	94024-64-3	FC1(F)C2(F)C(F)(F)C12F	1
DTXSID00760218	5,5,6,6,7,7,8,8,8-Nonafluoro-2-methyloct-2-ene	97294-02-5	CC(C)=CCC(F)(F)C(F)(F)C(F)(F)C(F)(F)F	1	1
DTXSID00762252	3-(3,3,4,4,5,5,6,6,7,7,8,8,8-Tridecafluorooctane-1-sulfonyl)propan-1-ol	106104-73-8	OCCCS(=O)(=O)CCC(F)(F)C(F)(F)C(F)(F)C(F)(F)C(F)(F)C(F)(F)F	1
DTXSID00762974	1,1,1,2,2,3,3-Heptafluoro-5-iodoundec-4-ene	109574-86-9	CCCCCCC(I)=CC(F)(F)C(F)(F)C(F)(F)F	1
DTXSID00763345	2,3,3,4,4,5,5,6,6,7,7-Undecafluoro-1-iodohept-1-ene	110680-45-0	FC(F)C(F)(F)C(F)(F)C(F)(F)C(F)(F)C(F)=CI	1
DTXSID00763441	1-Ethenyl-4-(2,2,3,3,4,4,4-heptafluorobutoxy)benzene	111144-99-1	FC(F)(F)C(F)(F)C(F)(F)COC1=CC=C(C=C)C=C1	1	1
DTXSID00764938	Methyl 4,4,5,5-tetrafluoro-3-hydroxypent-2-enoate	113341-47-2	COC(=O)C=C(O)C(F)(F)C(F)F	1
DTXSID00765162	6-[(Nonadecafluorononyl)oxy]hexanoic acid	113560-31-9	OC(=O)CCCCCOC(F)(F)C(F)(F)C(F)(F)C(F)(F)C(F)(F)C(F)(F)C(F)(F)C(F)(F)C(F)(F)F	1
DTXSID00765263	1-[(Tridecafluorohexyl)oxy]nonane	113659-14-6	CCCCCCCCCOC(F)(F)C(F)(F)C(F)(F)C(F)(F)C(F)(F)C(F)(F)F	1
DTXSID00765521	(2,2,3,3,4,4,5,5,6,6-Decafluorohexyl)phosphonic acid	113933-95-2	OP(O)(=O)CC(F)(F)C(F)(F)C(F)(F)C(F)(F)C(F)F	1
DTXSID00766215	2,2,3,3,4,4-Hexafluoro-4-sulfinobutanoic acid	115432-29-6	OC(=O)C(F)(F)C(F)(F)C(F)(F)S(O)=O	1
DTXSID00766376	1,1'-(Difluoromethylene)bis[2,2,3,3,4,4,5,5,6-nonafluoro-1,6-bis(trifluoromethyl)cyclohexane]	116107-58-5	FC(F)(F)C1(F)C(F)(F)C(F)(F)C(F)(F)C(F)(F)C1(C(F)(F)F)C(F)(F)C1(C(F)(F)F)C(F)(F)C(F)(F)C(F)(F)C(F)(F)C1(F)C(F)(F)F	1
DTXSID00766654	4-(Difluoromethyl)-1,2,3,3,4,5,5,6,6-nonafluorocyclohex-1-ene	116487-62-8	FC(F)C1(F)C(F)(F)C(F)=C(F)C(F)(F)C1(F)F	1
DTXSID00766851	1-Ethenyl-4-{[(3,3,4,4,5,5,6,6,6-nonafluorohexyl)oxy]methyl}benzene	117767-64-3	FC(F)(F)C(F)(F)C(F)(F)C(F)(F)CCOCC1=CC=C(C=C)C=C1	1
DTXSID00766972	2,2,3,3,4,4,5,5-Octafluoropentyl 4-hydroxybenzoate	118841-84-2	OC1=CC=C(C=C1)C(=O)OCC(F)(F)C(F)(F)C(F)(F)C(F)F	1
DTXSID00766992	Diethyl (pentafluoroethyl)phosphonate	119157-77-6	CCOP(=O)(OCC)C(F)(F)C(F)(F)F	1
DTXSID00767080	Benzoic acid--2,2,3,3,4,4,5,5,6,6,7,7,8,8,8-pentadecafluorooctan-1-ol (1/1)	120123-05-9	OC(=O)C1=CC=CC=C1.OCC(F)(F)C(F)(F)C(F)(F)C(F)(F)C(F)(F)C(F)(F)C(F)(F)F	1
DTXSID00768057	1,4-Bis(heptadecafluorooctyl)benzene	132877-69-1	FC(F)(F)C(F)(F)C(F)(F)C(F)(F)C(F)(F)C(F)(F)C(F)(F)C(F)(F)C1=CC=C(C=C1)C(F)(F)C(F)(F)C(F)(F)C(F)(F)C(F)(F)C(F)(F)C(F)(F)C(F)(F)F	1
DTXSID00768577	(E)-1-(1,3,3,4,4,4-Hexafluorobut-1-en-1-yl)-2-phenyldiazene	137731-01-2	FC(=CC(F)(F)C(F)(F)F)\N=N\C1=CC=CC=C1	1
DTXSID00771849	3-(2,2,3,3-Tetrafluoropropoxy)thiophene	144203-97-4	FC(F)C(F)(F)COC1=CSC=C1	1
DTXSID00771905	5,5,6,6,7,7,8,8,8-Nonafluoro-3-iodo-2-methyloct-3-en-2-ol	144295-00-1	CC(C)(O)C(I)=CC(F)(F)C(F)(F)C(F)(F)C(F)(F)F	1
DTXSID00773505	4,4,5,5,6,6,7,7,8,8,9,9,10,10,10-Pentadecafluoro-1-[(prop-2-en-1-yl)oxy]-3-[(3,3,4,4,5,5,6,6,7,7,8,8,8-tridecafluorooctyl)oxy]decan-2-yl carbonate	192326-53-7	[O-]C(=O)OC(COCC=C)C(OCCC(F)(F)C(F)(F)C(F)(F)C(F)(F)C(F)(F)C(F)(F)F)C(F)(F)C(F)(F)C(F)(F)C(F)(F)C(F)(F)C(F)(F)C(F)(F)F	1
DTXSID00774092	1-[Bis(2-hydroxyethyl)amino]-4,4,5,5,6,6,6-heptafluorohexan-2-ol	189160-58-5	OCCN(CCO)CC(O)CC(F)(F)C(F)(F)C(F)(F)F	1	1
DTXSID00775302	Methyl (2R,3S)-3-(pentadecafluoroheptyl)oxirane-2-carboxylate	184007-51-0	COC(=O)[C@@H]1O[C@@H]1C(F)(F)C(F)(F)C(F)(F)C(F)(F)C(F)(F)C(F)(F)C(F)(F)F	1
DTXSID00775625	4-Nitrophenyl heptafluorobutanoate	1799-92-4	[O-][N+](=O)C1=CC=C(OC(=O)C(F)(F)C(F)(F)C(F)(F)F)C=C1	1	1
DTXSID00775923	(Heptadecafluorooctyl)cycloheptane	172369-52-7	FC(F)(F)C(F)(F)C(F)(F)C(F)(F)C(F)(F)C(F)(F)C(F)(F)C(F)(F)C1CCCCCC1	1
DTXSID00776036	Methyltris(2,2,3,3,3-pentafluoropropoxy)silane	169155-40-2	C[Si](OCC(F)(F)C(F)(F)F)(OCC(F)(F)C(F)(F)F)OCC(F)(F)C(F)(F)F	1
DTXSID00780638	2-(3,3,4,4,5,5,6,6,7,7,8,8,8-Tridecafluorooctyl)propane-1,3-diol	25664-42-0	OCC(CO)CCC(F)(F)C(F)(F)C(F)(F)C(F)(F)C(F)(F)C(F)(F)F	1
DTXSID00780779	1,1,1,2,3,3-Hexafluoro-4-(1,1,2,2-tetrafluoroethoxy)pentane	24556-39-6	CC(OC(F)(F)C(F)F)C(F)(F)C(F)C(F)(F)F	1
DTXSID00781089	12,12,13,13,14,14,15,15,15-Nonafluoropentadecane-1-thiol	220414-23-3	FC(F)(F)C(F)(F)C(F)(F)C(F)(F)CCCCCCCCCCCS	1
DTXSID00782556	3-[Chloro(dimethyl)silyl]propyl pentadecafluorooctanoate	20120-37-0	C[Si](C)(Cl)CCCOC(=O)C(F)(F)C(F)(F)C(F)(F)C(F)(F)C(F)(F)C(F)(F)C(F)(F)F	1
DTXSID00784373	Bis(heptadecafluorooctyl)diazene	3829-39-8	FC(F)(F)C(F)(F)C(F)(F)C(F)(F)C(F)(F)C(F)(F)C(F)(F)C(F)(F)N=NC(F)(F)C(F)(F)C(F)(F)C(F)(F)C(F)(F)C(F)(F)C(F)(F)C(F)(F)F	1
DTXSID00785047	1,1,1,3,3,3-Hexafluoro-N-(2-fluorophenyl)propan-2-imine	305837-16-5	FC1=CC=CC=C1N=C(C(F)(F)F)C(F)(F)F	1
DTXSID00786953	Bis(tridecafluorohexyl)phosphinic acid	40143-77-9	OP(=O)(C(F)(F)C(F)(F)C(F)(F)C(F)(F)C(F)(F)C(F)(F)F)C(F)(F)C(F)(F)C(F)(F)C(F)(F)C(F)(F)C(F)(F)F	1	1
DTXSID00787162	4-[(1,2,3,3,4,4,5,5,6,6,7,7,8,8,9,9,9-Heptadecafluoronon-1-en-1-yl)oxy]-N-(hydroxymethyl)benzamide	59379-88-3	OCNC(=O)C1=CC=C(OC(F)=C(F)C(F)(F)C(F)(F)C(F)(F)C(F)(F)C(F)(F)C(F)(F)C(F)(F)F)C=C1	1
DTXSID00787364	3,6-Bis(heptafluoropropyl)-1,2,4,5-tetrazine	5585-47-7	FC(F)(F)C(F)(F)C(F)(F)C1=NN=C(N=N1)C(F)(F)C(F)(F)C(F)(F)F	1
DTXSID00787369	2,6-Difluoro-3,5-bis(1,1,1,2,3,3,3-heptafluoropropan-2-yl)pyrazine	55827-95-7	FC1=NC(F)=C(N=C1C(F)(C(F)(F)F)C(F)(F)F)C(F)(C(F)(F)F)C(F)(F)F	1
DTXSID00789409	Bis(pentafluoroethyl)triselane	51684-79-8	FC(F)(F)C(F)(F)[Se][Se][Se]C(F)(F)C(F)(F)F	1
DTXSID00789646	Carbamic acid--2-[2,2-bis(trifluoromethyl)-1,3-dioxolan-4-yl]ethan-1-ol (1/1)	51125-65-6	NC(O)=O.OCCC1COC(O1)(C(F)(F)F)C(F)(F)F	1
DTXSID00791668	7,8-Bis(5,5,6,6,7,7,7-heptafluoroheptyl)tetradecanedioic acid	67224-12-8	OC(=O)CCCCCC(CCCCC(F)(F)C(F)(F)C(F)(F)F)C(CCCCCC(O)=O)CCCCC(F)(F)C(F)(F)C(F)(F)F	1
DTXSID00793925	[(1,2,3,3,4,4,5,5,6,6,7,7,8,8,9,9,9-Heptadecafluoronon-1-en-1-yl)sulfanyl]benzene	65079-24-5	FC(SC1=CC=CC=C1)=C(F)C(F)(F)C(F)(F)C(F)(F)C(F)(F)C(F)(F)C(F)(F)C(F)(F)F	1
DTXSID00794432	Phosphoric acid--3,3,3-trifluoro-2-(trifluoromethyl)propan-1-ol (1/3)	64660-92-0	OP(O)(O)=O.OCC(C(F)(F)F)C(F)(F)F.OCC(C(F)(F)F)C(F)(F)F.OCC(C(F)(F)F)C(F)(F)F	1
DTXSID00794573	Ethyl 3-chloro-2,2,3,4,4,5,6,6-octafluorohex-5-enoate	64566-20-7	CCOC(=O)C(F)(F)C(F)(Cl)C(F)(F)C(F)=C(F)F	1
DTXSID00796638	1-Amino-5,5,6,6,7,7,8,8,9,9,10,10,10-tridecafluorodecan-2-ol	62571-57-7	NCC(O)CCC(F)(F)C(F)(F)C(F)(F)C(F)(F)C(F)(F)C(F)(F)F	1
DTXSID00797347	4-[1,1,1,3,3,3-Hexafluoro-2-(trifluoromethyl)propane-2-sulfonyl]aniline	68596-43-0	NC1=CC=C(C=C1)S(=O)(=O)C(C(F)(F)F)(C(F)(F)F)C(F)(F)F	1
DTXSID00797867	2-[4-(Benzyloxy)-2,2,3,3-tetrafluorobutoxy]ethan-1-ol	663176-03-2	OCCOCC(F)(F)C(F)(F)COCC1=CC=CC=C1	1
DTXSID00799265	2,2,3,3-Tetrafluoropropyl 4-(2H-tetrazol-5-yl)benzoate	651769-26-5	FC(F)C(F)(F)COC(=O)C1=CC=C(C=C1)C1=NNN=N1	1
DTXSID00800360	3,3,4,4,5,5,6,6,6-Nonafluoro-N,N,N-tripropylhexan-1-aminium iodide	649724-86-7	[I-].CCC[N+](CCC)(CCC)CCC(F)(F)C(F)(F)C(F)(F)C(F)(F)F	1
DTXSID00802945	2,2,3,4,4,5,5,5-Octafluoro-3-(trifluoromethyl)pentanoic acid	64139-66-8	OC(=O)C(F)(F)C(F)(C(F)(F)F)C(F)(F)C(F)(F)F	1
DTXSID00803452	2-{2-[2-(2,2,3,3,3-Pentafluoropropoxy)ethoxy]ethoxy}ethan-1-ol	63693-17-4	OCCOCCOCCOCC(F)(F)C(F)(F)F	1
DTXSID00805092	1,2,2,3,3,4,4,5,5,6,6,7,7,8,8-Pentadecafluorocyclooctan-1-ol	62789-53-1	OC1(F)C(F)(F)C(F)(F)C(F)(F)C(F)(F)C(F)(F)C(F)(F)C1(F)F	1
DTXSID00806160	1,1,2,2,3,3,4,4-Octafluoroundecane-5,6-dione	62679-64-5	CCCCCC(=O)C(=O)C(F)(F)C(F)(F)C(F)(F)C(F)F	1
DTXSID00806766	Benzoic acid--1,1,3,3,3-pentafluoro-2-(trifluoromethyl)propan-1-ol (1/1)	62619-31-2	OC(=O)C1=CC=CC=C1.OC(F)(F)C(C(F)(F)F)C(F)(F)F	1
DTXSID00808048	1,1,1,7,7,7-Hexafluoro-2,2,6,6-tetrakis(trifluoromethyl)hept-3-ene	62498-14-0	FC(F)(F)C(CC=CC(C(F)(F)F)(C(F)(F)F)C(F)(F)F)(C(F)(F)F)C(F)(F)F	1
DTXSID00808240	5-Hydroxy-3,7-bis{2,2,3,3-tetrafluoro-3-[(1,1,1,2,3,3,3-heptafluoropropan-2-yl)oxy]propyl}-4,5,6,7-tetrahydro-3H-2,8-benzodioxacycloundecine-1,9-dione	62478-08-4	OC1CC(CC(F)(F)C(F)(F)OC(F)(C(F)(F)F)C(F)(F)F)OC(=O)C2=CC=CC=C2C(=O)OC(CC(F)(F)C(F)(F)OC(F)(C(F)(F)F)C(F)(F)F)C1	1
DTXSID00809176	3-Methoxy-3-pentyl-5,5-bis(trifluoromethyl)-1,2-dithiolane	62378-55-6	CCCCCC1(CC(SS1)(C(F)(F)F)C(F)(F)F)OC	1
DTXSID00811759	1,1,1,3-Tetrafluoro-2-(trifluoromethyl)hept-3-ene	62116-46-5	CCCC=C(F)C(C(F)(F)F)C(F)(F)F	1
DTXSID00813430	[2,2-Bis(trifluoromethyl)cyclopropyl](phenyl)methanone	61859-97-0	FC(F)(F)C1(CC1C(=O)C1=CC=CC=C1)C(F)(F)F	1
DTXSID00813814	2-Fluoroethyl pentafluoropropanoate	61799-71-1	FCCOC(=O)C(F)(F)C(F)(F)F	1
DTXSID00816406	2-(1,1,2,2-Tetrafluoro-2-phenylethyl)aniline--hydrogen chloride (1/1)	61547-72-6	Cl.NC1=CC=CC=C1C(F)(F)C(F)(F)C1=CC=CC=C1	1
DTXSID00817377	2,2,3,3,5,5,6-Heptafluoro-6-(prop-1-en-2-yl)-1,4-dioxane	61448-92-8	CC(=C)C1(F)OC(F)(F)C(F)(F)OC1(F)F	1
DTXSID00818329	2,3,3,4,4,4-Hexafluoro-2-(pentafluoroethyl)butanoyl fluoride	61340-75-8	FC(=O)C(F)(C(F)(F)C(F)(F)F)C(F)(F)C(F)(F)F	1
DTXSID00818945	2-Ethyl-3,4,4,5,5,6,6,7,7,8,8,8-dodecafluorooct-2-enal	61282-83-5	CCC(C=O)=C(F)C(F)(F)C(F)(F)C(F)(F)C(F)(F)C(F)(F)F	1	1
DTXSID00822163	N~1~-(2-Aminophenyl)-2,2,3,3-tetrafluorobutanediamide	60351-77-1	NC(=O)C(F)(F)C(F)(F)C(=O)NC1=CC=CC=C1N	1
DTXSID00822305	2-(Heptafluoropropyl)-4-methyl-5,7-dinitro-1H-benzimidazole	60167-95-5	CC1=C2N=C(NC2=C(C=C1[N+]([O-])=O)[N+]([O-])=O)C(F)(F)C(F)(F)C(F)(F)F	1
DTXSID00822683	(1,2,3,3,4,4,4-Heptafluorobut-1-en-1-yl)benzene	783372-47-4	FC(=C(F)C(F)(F)C(F)(F)F)C1=CC=CC=C1	1
DTXSID00822784	1,1,2,2-Tetrafluoro-3,4-dimethylidenecyclobutane	7704-59-8	FC1(F)C(=C)C(=C)C1(F)F	1
DTXSID00822860	(Heptadecafluorooctyl)silane	762260-70-8	FC(F)(F)C(F)(F)C(F)(F)C(F)(F)C(F)(F)C(F)(F)C(F)(F)C(F)(F)[SiH3]	1
DTXSID00825593	1,1,2,2,3,3,4,4,5,5,6,6,7,7-Tetradecafluoroheptan-1-ol	7098-02-4	OC(F)(F)C(F)(F)C(F)(F)C(F)(F)C(F)(F)C(F)(F)C(F)F	1	1
DTXSID00826287	Trimethyl(nonafluorobutyl)stannane	876903-01-4	C[Sn](C)(C)C(F)(F)C(F)(F)C(F)(F)C(F)(F)F	1
DTXSID00827451	Carbonic acid--2,2,3,4,4,4-hexafluorobutan-1-ol (1/2)	847755-25-3	OC(O)=O.OCC(F)(F)C(F)C(F)(F)F.OCC(F)(F)C(F)C(F)(F)F	1
DTXSID00829253	(E)-1-[(1,1,2,2,3,3,4,4,4-Nonafluorobutane-1-sulfonyl)oxy]-1-oxo-2-phenyl-1lambda~5~-diazene	88280-62-0	[O-]\[N+](OS(=O)(=O)C(F)(F)C(F)(F)C(F)(F)C(F)(F)F)=N/C1=CC=CC=C1	1
DTXSID00830708	But-2-en-1-yl 2-fluoro-3-methyl-2-(trifluoromethyl)pent-4-enoate	88071-32-3	CC=CCOC(=O)C(F)(C(C)C=C)C(F)(F)F	1
DTXSID00831230	(2,2,3,3,4,4,5,5,6,6-Decafluorocyclohexane-1,1-diyl)dimethanol	87981-51-9	OCC1(CO)C(F)(F)C(F)(F)C(F)(F)C(F)(F)C1(F)F	1
DTXSID00832080	Ethyl 3-amino-4,4,5,5,6,6,6-heptafluorohex-2-enoate	87613-26-1	CCOC(=O)C=C(N)C(F)(F)C(F)(F)C(F)(F)F	1	1
DTXSID00833310	2-[(3,3,4,4,5,5,6,6,6-Nonafluorohexyl)sulfanyl]ethyl prop-2-enoate	866208-89-1	FC(F)(F)C(F)(F)C(F)(F)C(F)(F)CCSCCOC(=O)C=C	1
DTXSID00834781	4-(Heptadecafluorooctyl)-3a,4,7,7a-tetrahydro-2-benzofuran-1,3-dione	834880-68-1	FC(F)(F)C(F)(F)C(F)(F)C(F)(F)C(F)(F)C(F)(F)C(F)(F)C(F)(F)C1C=CCC2C1C(=O)OC2=O	1
DTXSID00836407	1,1,1,2,2,3,4,4,5,5,5-Undecafluoro-3-(fluoroperoxy)pentane	828259-48-9	FOOC(F)(C(F)(F)C(F)(F)F)C(F)(F)C(F)(F)F	1
DTXSID00837656	1,1,1-Trifluoro-4-[(propan-2-yl)amino]-2-(trifluoromethyl)butan-2-ol	824954-69-0	CC(C)NCCC(O)(C(F)(F)F)C(F)(F)F	1
DTXSID00838880	2-{[(6,6,7,7,8,8,9,9,10,10,11,11,12,12,13,13,13-Heptadecafluorotridecan-3-yl)oxy]carbonyl}hydrazine-1-carboxylate	821806-55-7	CCC(CCC(F)(F)C(F)(F)C(F)(F)C(F)(F)C(F)(F)C(F)(F)C(F)(F)C(F)(F)F)OC(=O)NNC([O-])=O	1
DTXSID00838885	4,4,5,5,6,6,7,7,7-Nonafluoroheptyl carbonochloridate	821806-42-2	FC(F)(F)C(F)(F)C(F)(F)C(F)(F)CCCOC(Cl)=O	1	1
DTXSID00839211	1-(4,4,5,5,5-Pentafluoropentyl)thiolan-1-ium chloride	821767-13-9	[Cl-].FC(F)(F)C(F)(F)CCC[S+]1CCCC1	1
DTXSID00840842	5-Chloro-1,1,2,2-tetrafluoro-2,3-dihydro-1H-indene	922141-52-4	FC1(F)CC2=C(C=CC(Cl)=C2)C1(F)F	1
DTXSID00840847	1-Methoxy-4-(2,2,3,3-tetrafluorocyclopropyl)benzene	922141-45-5	COC1=CC=C(C=C1)C1C(F)(F)C1(F)F	1
DTXSID00843777	2,3,3,4,4,4-Hexafluorobut-1-ene-1,1-dithiol	919515-73-4	FC(=C(S)S)C(F)(F)C(F)(F)F	1
DTXSID00844623	Fluoro[1,1,2,2-tetrafluoro-2-(trifluoromethoxy)ethoxy]acetic acid	919005-05-3	OC(=O)C(F)OC(F)(F)C(F)(F)OC(F)(F)F	1
DTXSID00846723	2,3,4,4,4-Pentafluoro-3-(trifluoromethyl)butanoic acid	917951-62-3	OC(=O)C(F)C(F)(C(F)(F)F)C(F)(F)F	1	1
DTXSID00848040	5,6,6,7,7,8,8,8-Octafluoro-2-methylocta-2,4-diene	90292-28-7	CC(C)=C\C=C(/F)C(F)(F)C(F)(F)C(F)(F)F	1	1
DTXSID00850027	2-[(1,2,3,3,4,4,5,5,6,6,7,7,8,8,9,9,10,10,10-Nonadecafluorodec-1-en-1-yl)oxy]benzoic acid	57344-87-3	OC(=O)C1=CC=CC=C1OC(F)=C(F)C(F)(F)C(F)(F)C(F)(F)C(F)(F)C(F)(F)C(F)(F)C(F)(F)C(F)(F)F	1
DTXSID00850188	Chloro(difluoromethoxy)difluoromethane	56726-75-1	FC(F)OC(F)(F)Cl	1
DTXSID00850289	Cyclohexyl[4-(1,1,2,2-tetrafluoroethoxy)phenyl]methanone	56426-09-6	FC(F)C(F)(F)OC1=CC=C(C=C1)C(=O)C1CCCCC1	1
DTXSID00853098	Tetradecafluorooctahydropentalene	57133-61-6	FC1(F)C(F)(F)C2(F)C(F)(F)C(F)(F)C(F)(F)C2(F)C1(F)F	1
DTXSID00855532	Difluoro(tridecafluorohexyl)borane	329009-01-0	FB(F)C(F)(F)C(F)(F)C(F)(F)C(F)(F)C(F)(F)C(F)(F)F	1
DTXSID00860964	3-{[3-(Dimethylamino)propyl](1,1,2,2,3,3,4,4,5,5,6,6,6-tridecafluorohexane-1-sulfonyl)amino}-2-hydroxypropane-1-sulfonic acid	788772-31-6	CN(C)CCCN(CC(O)CS(O)(=O)=O)S(=O)(=O)C(F)(F)C(F)(F)C(F)(F)C(F)(F)C(F)(F)C(F)(F)F	1
DTXSID00861931	1,1,1,2,3,3-Hexafluoropropane	431-63-0	FC(F)C(F)C(F)(F)F	1
DTXSID00870523	1H,1H,3H-Perfluorobutanol	382-31-0	OCC(F)(F)C(F)C(F)(F)F	1	1
DTXSID00871439	1,1,1,2,3,3-Hexafluoro-4-methoxybutane	58705-93-4	COCC(F)(F)C(F)C(F)(F)F	1
DTXSID00873014	Perfluorodecanesulfonate	126105-34-8	[O-]S(=O)(=O)C(F)(F)C(F)(F)C(F)(F)C(F)(F)C(F)(F)C(F)(F)C(F)(F)C(F)(F)C(F)(F)C(F)(F)F	1
DTXSID00873413	3,3,4,4,5,5,6,6,6-Nonafluorohexyl 3,3,4,4,5,5,6,6,7,7,8,8,8-tridecafluorooctyl phosphate	1411713-84-2	[O-]P(=O)(OCCC(F)(F)C(F)(F)C(F)(F)C(F)(F)F)OCCC(F)(F)C(F)(F)C(F)(F)C(F)(F)C(F)(F)C(F)(F)F	1
DTXSID00880147	1,1,1,2,4,4,5,5,6,6,6-Undecafluoro-2-(trifluoromethyl)-3-hexanone	813-45-6	FC(F)(F)C(F)(F)C(F)(F)C(=O)C(F)(C(F)(F)F)C(F)(F)F	1	1
DTXSID00880162	1,1,1,2,2,4,4,5,5,5-Decafluoro-3-pentanone	684-32-2	FC(F)(F)C(F)(F)C(=O)C(F)(F)C(F)(F)F	1
DTXSID00880187	3,5,7,8-Tetrachloroperfluorooctanoic acid	2923-68-4	OC(=O)C(F)(F)C(F)(Cl)C(F)(F)C(F)(Cl)C(F)(F)C(F)(Cl)C(F)(F)Cl	1
DTXSID00880203	Ammonium 2-(2-(2-(aminosulphonyl)-1,1,2,2-tetrafluoroethoxy)-1,1,2,3,3,3-hexafluoropropoxy)-2,3,3,3-tetrafluoropropionate	4089-61-6	[H][N+]([H])([H])[H].[H]N([H])S(=O)(=O)C(F)(F)C(F)(F)OC(F)(C(F)(F)F)C(F)(F)OC(F)(C([O-])=O)C(F)(F)F	1	1
DTXSID00880223	3,3,4,4,5,5,6,6,7,7,8,8,9,10,10,10-Hexadecafluoro-9-(trifluoromethyl)decyl acrylate	15577-26-1	FC(F)(F)C(F)(C(F)(F)F)C(F)(F)C(F)(F)C(F)(F)C(F)(F)C(F)(F)C(F)(F)CCOC(=O)C=C	1	1
DTXSID00880228	3,3,4,4-Tetrafluoro-2-butanol	17425-25-1	CC(O)C(F)(F)C(F)F	1
DTXSID00880243	Fluoroether E4	26738-51-2	FC(OC(F)(F)C(F)(OC(F)(F)C(F)(OC(F)(F)C(F)(OC(F)(F)C(F)(F)C(F)(F)F)C(F)(F)F)C(F)(F)F)C(F)(F)F)C(F)(F)F	1	1
DTXSID00880248	Perfluoro-3-ethyl-2,4-dimethyl-2-pentene	30320-26-4	FC(F)(F)C(=C(C(F)(F)C(F)(F)F)C(F)(C(F)(F)F)C(F)(F)F)C(F)(F)F	1	1
DTXSID00880389	2-(Perfluorodecyl)ethanethiol	34451-28-0	FC(F)(F)C(F)(F)C(F)(F)C(F)(F)C(F)(F)C(F)(F)C(F)(F)C(F)(F)C(F)(F)C(F)(F)CCS	1	1
DTXSID00880420	2,2,3,3,4,4,5,5,6,6,7,7,8,8,9,9,10,10,11,11-Icosafluoroundecyl methacrylate	41123-44-8	CC(=C)C(=O)OC(F)C(F)(F)C(F)(F)C(F)(F)C(F)(F)C(F)(F)C(F)(F)C(F)(F)C(F)(F)C(F)(F)CF	1	1
DTXSID00880465	(1H,1H-Perfluoro-12-methyltridecyl)oxirane	54009-78-8	FC(F)(F)C(F)(C(F)(F)F)C(F)(F)C(F)(F)C(F)(F)C(F)(F)C(F)(F)C(F)(F)C(F)(F)C(F)(F)C(F)(F)C(F)(F)CC1CO1	1	1
DTXSID00880521	Perfluoro-2,3-bis(2,5-dimethyl-1,4-dioxan-3-oxy)butane	61097-98-1	FC(F)(F)C(F)(OC1(F)OC(F)(C(F)(F)F)C(F)(F)OC1(F)C(F)(F)F)C(F)(OC1(F)OC(F)(C(F)(F)F)C(F)(F)OC1(F)C(F)(F)F)C(F)(F)F	1	1
DTXSID00880541	3,3,4,4,5,5,6,6,7,7,8,8,8-Tridecafluorooctyl chloride	64018-25-3	FC(F)(F)C(F)(F)C(F)(F)C(F)(F)C(F)(F)C(F)(F)CCCl	1	1
DTXSID00880546	N1-(2-Aminoethyl)-N2-(2-{[(1,1,2,2,3,3,4,4,5,5,6,6,7,7,8,8,8-heptadecafluorooctane-1-sulfonyl)oxy]amino}ethyl)ethane-1,2-diamine	NOCAS_880546	NCCNCCNCCNOS(=O)(=O)C(F)(F)C(F)(F)C(F)(F)C(F)(F)C(F)(F)C(F)(F)C(F)(F)C(F)(F)F	1
DTXSID00880607	Sodium 2-((nonafluorobutylsulfonylamino)methyl)benzenesulfonate	68299-19-4	[Na+].[H]N(CC1=CC=CC=C1S([O-])(=O)=O)S(=O)(=O)C(F)(F)C(F)(F)C(F)(F)C(F)(F)F	1	1
DTXSID00880940	Perfluoro-3-{[1-(ethenyloxy)propan-2-yl]oxy}propanoic acid	69087-46-3	OC(=O)C(F)(F)C(F)(F)OC(F)(C(F)(F)F)C(F)(F)OC(F)=C(F)F	1	1
DTXSID00880960	2-Methyl-N-(2-methyl-5-(((1,3-bis((perfluoro-9-methyldecyl)ethylthio)-2-propoxy)carbonyl)amino)phenyl)-1-aziridinecarboxamide	72779-04-5	CC1CN1C(=O)NC1=C(C)C=CC(NC(=O)OC(CSCCC(F)(F)C(F)(F)C(F)(F)C(F)(F)C(F)(F)C(F)(F)C(F)(F)C(F)(F)C(F)(C(F)(F)F)C(F)(F)F)CSCCC(F)(F)C(F)(F)C(F)(F)C(F)(F)C(F)(F)C(F)(F)C(F)(F)C(F)(F)C(F)(C(F)(F)F)C(F)(F)F)=C1	1	1
DTXSID00880965	4-(4-(2-((Perfluorooctylsulfonyl)propylamino)ethylaminocarbonyl)phenylmethyl)-N-octadecylbenzamide	73019-19-9	CCCCCCCCCCCCCCCCCCNC(=O)C1=CC=C(CC2=CC=C(C=C2)C(=O)NCCN(CCC)S(=O)(=O)C(F)(F)C(F)(F)C(F)(F)C(F)(F)C(F)(F)C(F)(F)C(F)(F)C(F)(F)F)C=C1	1	1
DTXSID00880980	1,1,2,2,3,3,4,4,5,5,6,6-Dodecafluoro-7-(vinyloxy)heptane	78971-81-0	FC(F)C(F)(F)C(F)(F)C(F)(F)C(F)(F)C(F)(F)COC=C	1	1
DTXSID00880985	3-(Perfluoro-7-(methyl)octyl)-2-hydroxypropyltrimethylammonium iodide	80909-29-1	[I-].C[N+](C)(C)CC(O)CC(F)(F)C(F)(F)C(F)(F)C(F)(F)C(F)(F)C(F)(F)C(F)(C(F)(F)F)C(F)(F)F	1	1
DTXSID00881013	(Perfluorooctyl)ethyl hydrogen fumarate	86130-60-1	OC(=O)\C=C\C(=O)OCCC(F)(F)C(F)(F)C(F)(F)C(F)(F)C(F)(F)C(F)(F)C(F)(F)C(F)(F)F	1	1
DTXSID00881018	1,1'-[Oxybis[(1-methyl-2,1-ethanediyl)oxy]]bis[3-(perfluorodecyl)propan-2-ol]	93776-01-3	CC(COCC(C)OCC(O)CC(F)(F)C(F)(F)C(F)(F)C(F)(F)C(F)(F)C(F)(F)C(F)(F)C(F)(F)C(F)(F)C(F)(F)F)OCC(O)CC(F)(F)C(F)(F)C(F)(F)C(F)(F)C(F)(F)C(F)(F)C(F)(F)C(F)(F)C(F)(F)C(F)(F)F	1	1
DTXSID00881058	Bis((perfluoro-13-methyltetradecyl)ethyl) hydrogen phosphate	93776-29-5	OP(=O)(OCCC(F)(F)C(F)(F)C(F)(F)C(F)(F)C(F)(F)C(F)(F)C(F)(F)C(F)(F)C(F)(F)C(F)(F)C(F)(F)C(F)(F)C(F)(C(F)(F)F)C(F)(F)F)OCCC(F)(F)C(F)(F)C(F)(F)C(F)(F)C(F)(F)C(F)(F)C(F)(F)C(F)(F)C(F)(F)C(F)(F)C(F)(F)C(F)(F)C(F)(C(F)(F)F)C(F)(F)F	1	1
DTXSID00881073	16:2 Fluorotelomer phosphate	93857-48-8	[NH4+].[NH4+].[O-]P([O-])(=O)OCCC(F)(F)C(F)(F)C(F)(F)C(F)(F)C(F)(F)C(F)(F)C(F)(F)C(F)(F)C(F)(F)C(F)(F)C(F)(F)C(F)(F)C(F)(F)C(F)(F)C(F)(F)C(F)(F)F	1	1
DTXSID00881114	Bis((perfluoro-9-methyldecyl)ethyl) phosphate	93857-55-7	OP(=O)(OCCC(F)(F)C(F)(F)C(F)(F)C(F)(F)C(F)(F)C(F)(F)C(F)(F)C(F)(F)C(F)(C(F)(F)F)C(F)(F)F)OCCC(F)(F)C(F)(F)C(F)(F)C(F)(F)C(F)(F)C(F)(F)C(F)(F)C(F)(F)C(F)(C(F)(F)F)C(F)(F)F	1	1
DTXSID00881134	Tetradecanoic acid, 1,1'-(methyl(3,3,4,4,5,5,6,6,6-nonafluorohexyl)silylene) ester	94094-26-5	CCCCCCCCCCCCC(C(O)=O)[Si](C)(CCC(F)(F)C(F)(F)C(F)(F)C(F)(F)F)C(CCCCCCCCCCCC)C(O)=O	1	1
DTXSID00881139	((Perfluorotetradecyl)methyl)oxirane	94158-67-5	FC(F)(F)C(F)(F)C(F)(F)C(F)(F)C(F)(F)C(F)(F)C(F)(F)C(F)(F)C(F)(F)C(F)(F)C(F)(F)C(F)(F)C(F)(F)C(F)(F)CC1CO1	1	1
DTXSID00881159	4,4,5,5,6,6,7,7,8,8,9,9,10,10,11,11,11-Heptadecafluoro-1-(vinyloxy)undecan-2-ol	94159-86-1	OC(COC=C)CC(F)(F)C(F)(F)C(F)(F)C(F)(F)C(F)(F)C(F)(F)C(F)(F)C(F)(F)F	1	1
DTXSID00881194	Bis(2-hydroxyethyl)ammonium bis((perfluoro-9-methyldecyl)ethyl) phosphate	94291-78-8	OCC[NH2+]CCO.[O-]P(=O)(OCCC(F)(F)C(F)(F)C(F)(F)C(F)(F)C(F)(F)C(F)(F)C(F)(F)C(F)(F)C(F)(C(F)(F)F)C(F)(F)F)OCCC(F)(F)C(F)(F)C(F)(F)C(F)(F)C(F)(F)C(F)(F)C(F)(F)C(F)(F)C(F)(C(F)(F)F)C(F)(F)F	1	1
DTXSID00881275	N-(3-(Dimethylamino)propyl)perfluoroheptanesulfonamide hydrochloride	67940-02-7	[Cl-].CN(C)CCC[NH2+]S(=O)(=O)C(F)(F)C(F)(F)C(F)(F)C(F)(F)C(F)(F)C(F)(F)C(F)(F)F	1	1
DTXSID00881331	3-((Perfluorooctylsulfonyl)-2-hydroxy-3-sulfopropylamino)-N-(2-hydroxyethyl)-N,N-dimethyl-1-propanaminium monosodium hydroxide	94133-91-2	[OH-].[Na+].C[N+](C)(CCO)CCCN(CC(O)CS([O-])(=O)=O)S(=O)(=O)C(F)(F)C(F)(F)C(F)(F)C(F)(F)C(F)(F)C(F)(F)C(F)(F)C(F)(F)F	1	1
DTXSID00881351	Perfluorobutane-1-sulfonamidoethanol	34454-99-4	OCCNS(=O)(=O)C(F)(F)C(F)(F)C(F)(F)C(F)(F)F	1	1
DTXSID00881356	3,5,7,9,11,11-Hexachloro-2,2,3,4,4,5,6,6,7,8,8,9,10,10,11-pentadecafluoroundecanoic acid	53281-37-1	OC(=O)C(F)(F)C(F)(Cl)C(F)(F)C(F)(Cl)C(F)(F)C(F)(Cl)C(F)(F)C(F)(Cl)C(F)(F)C(F)(Cl)Cl	1
DTXSID00881391	1,1,1,2,2,3,3,4,4,5,5,6,6,7,7-Pentadecafluorooctacosane	1980063-68-0	CCCCCCCCCCCCCCCCCCCCCC(F)(F)C(F)(F)C(F)(F)C(F)(F)C(F)(F)C(F)(F)C(F)(F)F	1
DTXSID00881836	O,O'-Dibutyl ethylphosphonous acid compd. with perfluoro-3-iodopropane (1:1)	80392-01-4	FC(F)(F)C(F)(F)C(F)(F)I.CCCCOP(CC)OCCCC	1	1
DTXSID00882020	N-(Perfluorohexanesulfonyl)-N-(3-dimethylaminopropyl)-3-aminopropanoic acid	141607-32-1	CN(C)CCCN(CCC(O)=O)S(=O)(=O)C(F)(F)C(F)(F)C(F)(F)C(F)(F)C(F)(F)C(F)(F)F	1	1
DTXSID00882626	Ammonium perfluoro[(5-methoxy-1,3-dioxolan-4-yl)oxy]acetate	1190931-27-1	[NH4+].[O-]C(=O)C(F)(F)OC1(F)OC(F)(F)OC1(F)OC(F)(F)F		1
DTXSID00882707	1-(1H,1H-Perfluoro(6,12,18-trioxadocosyl)) 2-hexadecylbutanedioate	223929-64-4	CCCCCCCCCCCCCCCCC(CC([O-])=O)C(=O)OCC(F)(F)C(F)(F)C(F)(F)C(F)(F)OC(F)(F)C(F)(F)C(F)(F)C(F)(F)C(F)(F)OC(F)(F)C(F)(F)C(F)(F)C(F)(F)C(F)(F)OC(F)(F)C(F)(F)C(F)(F)C(F)(F)F	1	1
DTXSID00882888	1-(2-Iodoethyl)perfluoroeicosane	263756-45-2	FC(F)(F)C(F)(F)C(F)(F)C(F)(F)C(F)(F)C(F)(F)C(F)(F)C(F)(F)C(F)(F)C(F)(F)C(F)(F)C(F)(F)C(F)(F)C(F)(F)C(F)(F)C(F)(F)C(F)(F)C(F)(F)C(F)(F)C(F)(F)CCI	1	1
DTXSID00882964	N-Decyl-N,N-dimethyl-1-decanaminium perfluorooctanesulfonate	251099-16-8	CCCCCCCCCC[N+](C)(C)CCCCCCCCCC.[O-]S(=O)(=O)C(F)(F)C(F)(F)C(F)(F)C(F)(F)C(F)(F)C(F)(F)C(F)(F)C(F)(F)F	1	1
DTXSID00882989	1,2-bis(2-Octyldodecyl) 3-((perfluoropentyl)ethyl) 2-hydroxy-1,2,3-propanetricarboxylate	214334-16-4	CCCCCCCCCCC(CCCCCCCC)COC(=O)CC(O)(CC(=O)OCCC(F)(F)C(F)(F)C(F)(F)C(F)(F)C(F)(F)F)C(=O)OCC(CCCCCCCC)CCCCCCCCCC	1	1
DTXSID00883370	Heptafluorobutyraldehyde ethyl hemiacetal	356-26-3	CCOC(O)C(F)(F)C(F)(F)C(F)(F)F	1	1
DTXSID00883375	Potassium perfluoropropanoate	378-76-7	[K+].[O-]C(=O)C(F)(F)C(F)(F)F	1
DTXSID00883411	Silver pentafluoropropionate	509-09-1	[Ag+].[O-]C(=O)C(F)(F)C(F)(F)F	1
DTXSID00883911	2-[2,4-Bis(1,1-dimethylpropyl)phenoxy]-N-[4-[(2,2,3,3,4,4,4-heptafluoro-1-oxobutyl)amino]-3-hydroxyphenyl]-Hexanamide	2923-93-5	CCCCC(OC1=C(C=C(C=C1)C(C)(C)CC)C(C)(C)CC)C(=O)NC1=CC=C(NC(=O)C(F)(F)C(F)(F)C(F)(F)F)C(O)=C1	1	1
DTXSID00884509	Perfluoro-2,5,8,11,14,17-hexamethyl-3,6,9,12,15,18-hexaoxaheneicosanoyl fluoride	13140-24-4	FC(=O)C(F)(OC(F)(F)C(F)(OC(F)(F)C(F)(OC(F)(F)C(F)(OC(F)(F)C(F)(OC(F)(F)C(F)(OC(F)(F)C(F)(F)C(F)(F)F)C(F)(F)F)C(F)(F)F)C(F)(F)F)C(F)(F)F)C(F)(F)F)C(F)(F)F	1	1
DTXSID00884887	2-(Difluoromethylene)-4,4,5-trifluoro-5-(trifluoromethyl)-1,3-dioxolane	17256-52-9	FC(F)=C1OC(F)(F)C(F)(O1)C(F)(F)F	1
DTXSID00892326	3,4,4,5,5,6,6,7,7,8,8,8-Dodecafluoro-2-octenoic acid	70887-88-6	OC(=O)C=C(F)C(F)(F)C(F)(F)C(F)(F)C(F)(F)C(F)(F)F	1	1
DTXSID00892341	5:3 Fluorotelomer betaine	171184-14-8	C[N+](C)(CCCC(F)(F)C(F)(F)C(F)(F)C(F)(F)C(F)(F)F)CC([O-])=O	1
DTXSID00892361	Perfluoro-2-(perfluoropropoxy)-2-(perfluoromethyl)propanoic acid	NOCAS_892361	OC(=O)C(OC(F)(F)C(F)(F)C(F)(F)F)(C(F)(F)F)C(F)(F)F	1
DTXSID00892442	Perfluoro-2,5-dimethyl-3,6-dioxanonanoic acid	13252-14-7	OC(=O)C(F)(OC(F)(F)C(F)(OC(F)(F)C(F)(F)C(F)(F)F)C(F)(F)F)C(F)(F)F	1	1
DTXSID00892447	Potassium 11-chloroeicosafluoro-3-oxaundecane-1-sulfonate	83329-89-9	[K+].[O-]S(=O)(=O)C(F)(F)C(F)(F)OC(F)(F)C(F)(F)C(F)(F)C(F)(F)C(F)(F)C(F)(F)C(F)(F)C(F)(F)Cl	1
DTXSID00892482	Perfluorododecanoate	171978-95-3	[O-]C(=O)C(F)(F)C(F)(F)C(F)(F)C(F)(F)C(F)(F)C(F)(F)C(F)(F)C(F)(F)C(F)(F)C(F)(F)C(F)(F)F	1
DTXSID00892487	Perfluoropentanoate	45167-47-3	[O-]C(=O)C(F)(F)C(F)(F)C(F)(F)C(F)(F)F	1
DTXSID00892503	2-(N-Methylperfluorooctanesulfonamido)acetate	909405-48-7	CN(CC([O-])=O)S(=O)(=O)C(F)(F)C(F)(F)C(F)(F)C(F)(F)C(F)(F)C(F)(F)C(F)(F)C(F)(F)F	1
DTXSID00892508	2,2,3,5,5,6,6,7,7,9,9,9-Dodecafluoro-4,8-dioxononanoic acid	NOCAS_892508	[H]C(F)(C(=O)C(F)(F)C(F)(F)C(F)(F)C(=O)C(F)(F)F)C(F)(F)C(O)=O	1
DTXSID00892523	8:2 Fluorotelomer sulfonamido N,N-dimethyl amine ion	1383438-87-6	[H]N(CCC[N+]([H])(C)C)S(=O)(=O)CCC(F)(F)C(F)(F)C(F)(F)C(F)(F)C(F)(F)C(F)(F)C(F)(F)C(F)(F)F	1
DTXSID00892528	4:2 Fluorotelomer thioether amido sulfonic acid	1333933-57-5	CC(C)(CS(O)(=O)=O)NC(=O)CCSCCC(F)(F)C(F)(F)C(F)(F)C(F)(F)F	1
DTXSID00892568	Ammonium 2H,2H-perfluoroheptylate	1637546-16-7	[NH4+].[O-]C(=O)CC(F)(F)C(F)(F)C(F)(F)C(F)(F)C(F)(F)F	1
DTXSID00892720	Heptadecafluorooctane-1-(~2~H)sulfonic acid	NOCAS_892720	[2H]OS(=O)(=O)C(F)(F)C(F)(F)C(F)(F)C(F)(F)C(F)(F)C(F)(F)C(F)(F)C(F)(F)F	1
DTXSID00892821	3,3,4,4,5,5,6,6,7,7,8,8,8-Tridecafluorooctane-1-(~2~H)sulfonic acid	NOCAS_892821	[2H]OS(=O)(=O)CCC(F)(F)C(F)(F)C(F)(F)C(F)(F)C(F)(F)C(F)(F)F	1
DTXSID00892927	16-H-Perfluorohexadecanoate	1696259-85-4	[H]C(F)(F)C(F)(F)C(F)(F)C(F)(F)C(F)(F)C(F)(F)C(F)(F)C(F)(F)C(F)(F)C(F)(F)C(F)(F)C(F)(F)C(F)(F)C(F)(F)C(F)(F)C([O-])=O	1
DTXSID00892942	13-H-Perfluorotridecanoate	1696259-78-5	[H]C(F)(F)C(F)(F)C(F)(F)C(F)(F)C(F)(F)C(F)(F)C(F)(F)C(F)(F)C(F)(F)C(F)(F)C(F)(F)C(F)(F)C([O-])=O	1
DTXSID00892947	Perfluorodecane amido amine oxide	70674-76-9	CN(C)(=O)CCCNC(=O)C(F)(F)C(F)(F)C(F)(F)C(F)(F)C(F)(F)C(F)(F)C(F)(F)C(F)(F)C(F)(F)F	1
DTXSID00892962	N-[3-(Dimethylamino)propyl]-perfluoroundecanamide	1513863-78-9	CN(C)CCCNC(=O)C(F)(F)C(F)(F)C(F)(F)C(F)(F)C(F)(F)C(F)(F)C(F)(F)C(F)(F)C(F)(F)C(F)(F)F	1
DTXSID00892967	Perfluoropropane sulfonate	110676-15-8	[O-]S(=O)(=O)C(F)(F)C(F)(F)C(F)(F)F	1
DTXSID00893252	3,3-Bis(trifluoromethyl)perfluoropentane	36591-89-6	FC(F)(F)C(F)(F)C(C(F)(F)F)(C(F)(F)F)C(F)(F)C(F)(F)F	1	1
DTXSID00893292	Perfluoro-2,2,5,5-tetramethylhexane	71076-47-6	FC(F)(F)C(C(F)(F)F)(C(F)(F)F)C(F)(F)C(F)(F)C(C(F)(F)F)(C(F)(F)F)C(F)(F)F	1	1
DTXSID00893318	N-(Carboxymethyl)-N-[3-[[(perfluorooctyl)sulfonyl]amino]propyl]-N,N-bis(2-hydroxy-3-sulfopropyl)ammonium chloride, trisodium	109669-84-3	[Na+].[Na+].[Na+].[Cl-].OC(C[N+](CCC[N-]S(=O)(=O)C(F)(F)C(F)(F)C(F)(F)C(F)(F)C(F)(F)C(F)(F)C(F)(F)C(F)(F)F)(CC(O)CS([O-])(=O)=O)CC(O)=O)CS([O-])(=O)=O	1	1
DTXSID00893338	Perfluorodecahydro-1-isobutylnaphthalene	118945-65-6	FC(F)(F)C(F)(C(F)(F)F)C(F)(F)C1(F)C(F)(F)C(F)(F)C(F)(F)C2(F)C(F)(F)C(F)(F)C(F)(F)C(F)(F)C12F	1	1
DTXSID00893353	4(perfluorooctyl)-2-butanol	149868-74-6	CC(O)CCC(F)(F)C(F)(F)C(F)(F)C(F)(F)C(F)(F)C(F)(F)C(F)(F)C(F)(F)F	1	1
DTXSID00893358	3-(((4-((1,1,1,4,5,5,5-Heptafluoro-3-(1,1,1,2,3,3,3-heptafluoro-2-propanyl)-4-(trifluoromethyl)-2-penten-2-yl)oxy)phenyl)sulfonyl)amino)-N,N,N-trimethyl-1-propanaminium iodide	158658-62-9	[I-].C[N+](C)(C)CCCNS(=O)(=O)C1=CC=C(OC(=C(C(F)(C(F)(F)F)C(F)(F)F)C(F)(C(F)(F)F)C(F)(F)F)C(F)(F)F)C=C1	1	1
DTXSID00893373	Diphenyl(2,4,6-trimethylphenyl)sulfonium perfluoro-1-octanesulfonate	258341-99-0	CC1=CC(C)=C([S+](C2=CC=CC=C2)C2=CC=CC=C2)C(C)=C1.[O-]S(=O)(=O)C(F)(F)C(F)(F)C(F)(F)C(F)(F)C(F)(F)C(F)(F)C(F)(F)C(F)(F)F	1	1
DTXSID00893378	4'-Hydroxy[1,1'-biphenyl]-4-yl 2-[perfluoro-4-morpholinylmethyl]-perfluoropropanoate	304658-31-9	OC1=CC=C(C=C1)C1=CC=C(OC(=O)C(F)(C(F)(F)F)C(F)(F)N2C(F)(F)C(F)(F)OC(F)(F)C2(F)F)C=C1	1	1
DTXSID00893398	4-(Nonafluorobutoxy)butanesulfonic acid ammonium salt	484023-69-0	[NH4+].[O-]S(=O)(=O)CCCCOC(F)(F)C(F)(F)C(F)(F)C(F)(F)F	1	1
DTXSID00893414	Perfluoro-4-(2-sulfoethoxy)pentanoic acid	2416366-18-0	OC(=O)C(F)(F)C(F)(F)C(F)(OC(F)(F)C(F)(F)S(O)(=O)=O)C(F)(F)F	1
DTXSID00893419	1H,1H,5H-Perfluoropentane-1-thiol	1597-11-1	FC(F)C(F)(F)C(F)(F)C(F)(F)CS	1
DTXSID00893454	4-{[(2E)-1,1,2,3,4,4,5,5,6,6,6-Undecafluorohex-2-en-1-yl]oxy}benzene-1-sulfonic acid	NOCAS_893454	OS(=O)(=O)C1=CC=C(OC(F)(F)C(\F)=C(/F)C(F)(F)C(F)(F)C(F)(F)F)C=C1	1
DTXSID00893530	Tetrapropylammonium perfluorooctanoate	277749-00-5	CCC[N+](CCC)(CCC)CCC.[O-]C(=O)C(F)(F)C(F)(F)C(F)(F)C(F)(F)C(F)(F)C(F)(F)C(F)(F)F	1	1
DTXSID00895155	1,1,1,2,2,3,3,4,4-Nonafluoropentane	158118-01-5	CC(F)(F)C(F)(F)C(F)(F)C(F)(F)F	1	1
DTXSID00895170	1,1,1,2,2,3,3,4,4-Nonafluorodecane	1190430-19-3	CCCCCCC(F)(F)C(F)(F)C(F)(F)C(F)(F)F	1	1
DTXSID00895175	5,5,6,6,7,7,7-Heptafluoroheptan-1-ol	883543-64-4	OCCCCC(F)(F)C(F)(F)C(F)(F)F	1	1
DTXSID00895190	5,6-Dichloro-1,1,1,2,2,3,3,4,4-nonafluorohexane	136483-77-7	FC(F)(F)C(F)(F)C(F)(F)C(F)(F)C(Cl)CCl	1	1
DTXSID00895195	1,1,1,2,2,3,3,4,4,6,6-Undecafluoro-8-iodooctane	53626-95-2	FC(F)(F)C(F)(F)C(F)(F)C(F)(F)CC(F)(F)CCI	1	1
DTXSID00895211	2-Chloro-3,3,4,4,5,5,6,6,6-nonafluorohex-1-ene	110927-72-5	FC(F)(F)C(F)(F)C(F)(F)C(F)(F)C(Cl)=C	1	1
DTXSID00895216	1,1,1,2,2,3,3,5,5,5-Decafluoro-4,4-bis(trifluoromethyl)pentane	29971-79-7	FC(F)(F)C(F)(F)C(F)(F)C(C(F)(F)F)(C(F)(F)F)C(F)(F)F	1	1
DTXSID00895231	1,1,1,2,2,5,5,6,6,7,7,7-Dodecafluoro-3-heptene	887111-61-7	FC(F)(F)C(F)(F)C=CC(F)(F)C(F)(F)C(F)(F)F	1	1
DTXSID00895236	1,1,1,2,2,3,3,4,4-Nonafluoro-6-iodohexadecane	1789721-11-4	CCCCCCCCCCC(I)CC(F)(F)C(F)(F)C(F)(F)C(F)(F)F	1	1
DTXSID00895251	5,5,6,6,7,7,8,8,8-Nonafluoro-3-iodooctan-1-ol	109574-81-4	OCCC(I)CC(F)(F)C(F)(F)C(F)(F)C(F)(F)F	1	1
DTXSID00895256	3,3,4,5,5,6,6,7,7,7-Decafluoroheptan-2-ol	7618-17-9	CC(O)C(F)(F)C(F)C(F)(F)C(F)(F)C(F)(F)F	1	1
DTXSID00895271	9,9,10,10,11,11,12,12,12-Nonafluoro-7-iodododecan-1-ol	172701-28-9	OCCCCCCC(I)CC(F)(F)C(F)(F)C(F)(F)C(F)(F)F	1	1
DTXSID00895291	1,2,3,3,4,4,5,5,6,6,7,7,8,8,8-Pentadecafluoro-1-octene	7621-51-4	FC=C(F)C(F)(F)C(F)(F)C(F)(F)C(F)(F)C(F)(F)C(F)(F)F	1	1
DTXSID00895312	1,1,1,2,2,3,3,4,4,5,5,6,6,7,7,8,8-Heptadecafluoro-10-iodohexadecane	96791-81-0	CCCCCCC(I)CC(F)(F)C(F)(F)C(F)(F)C(F)(F)C(F)(F)C(F)(F)C(F)(F)C(F)(F)F	1	1
DTXSID00895317	1,1,1,2,2,3,3-Heptafluoro-6-iodo-4,4-bis(trifluoromethyl)decane	123629-50-5	CCCCC(I)CC(C(F)(F)F)(C(F)(F)F)C(F)(F)C(F)(F)C(F)(F)F	1	1
DTXSID00895332	1,1,1,2,2,3,3,4,4,5,5,6,6,9,9,10,10,11,11,12,12,13,13,14,14,14-Hexacosafluorotetradecane	53749-64-7	FC(F)(F)C(F)(F)C(F)(F)C(F)(F)C(F)(F)C(F)(F)CCC(F)(F)C(F)(F)C(F)(F)C(F)(F)C(F)(F)C(F)(F)F	1	1
DTXSID00895337	N,N,1,1-Tetramethyl-1-(3,3,4,4,5,5,6,6,6-nonafluorohexyl)silanamine	1221157-07-8	CN(C)[Si](C)(C)CCC(F)(F)C(F)(F)C(F)(F)C(F)(F)F	1	1
DTXSID00895352	4,4,5,5,6,6,7,7,8,8,9,9,9-Tridecafluoro-2-iodononan-1-ol	38550-44-6	OCC(I)CC(F)(F)C(F)(F)C(F)(F)C(F)(F)C(F)(F)C(F)(F)F	1	1
DTXSID00895357	1,1,1,2,2,3,3,4,4,5,5,6,6,7,7,8,8,9,9,10,10-Henicosafluorotetracosane	200817-56-7	CCCCCCCCCCCCCCC(F)(F)C(F)(F)C(F)(F)C(F)(F)C(F)(F)C(F)(F)C(F)(F)C(F)(F)C(F)(F)C(F)(F)F	1	1
DTXSID00895372	1,1,1,2,2,3,3,4,4,5,5,6,6,7,7,8,8-Heptadecafluoro-10-iodooctadecane	176979-17-2	CCCCCCCCC(I)CC(F)(F)C(F)(F)C(F)(F)C(F)(F)C(F)(F)C(F)(F)C(F)(F)C(F)(F)F	1	1
DTXSID00895377	5-(Difluoromethoxy)-1,1,1,2,2,3,3,4,4-nonafluoropentane	1661005-79-3	FC(F)OCC(F)(F)C(F)(F)C(F)(F)C(F)(F)F	1	1
DTXSID00895392	1,1,1,2,2,3,3,4,4,5,5,6,6,7,7,8,8,9,9,10,10-Henicosafluoro-12-iodooctadecane	129838-40-0	CCCCCCC(I)CC(F)(F)C(F)(F)C(F)(F)C(F)(F)C(F)(F)C(F)(F)C(F)(F)C(F)(F)C(F)(F)C(F)(F)F	1	1
DTXSID00895397	1,1,1,2,2,3,3,4,4,12,12,13,13,14,14,15,15,15-Octadecafluoro-6,10-diiodopentadecane	40735-25-9	FC(F)(F)C(F)(F)C(F)(F)C(F)(F)CC(I)CCCC(I)CC(F)(F)C(F)(F)C(F)(F)C(F)(F)F	1	1
DTXSID00895413	1,1,1,2,2,3,3-Heptafluoro-4-(2,2,3,3,4,4,4-heptafluorobutoxy)butane	647-91-6	FC(F)(F)C(F)(F)C(F)(F)COCC(F)(F)C(F)(F)C(F)(F)F	1	1
DTXSID00895418	2-[(3,3,4,4,5,5,6,6,6-Nonafluorohexyl)oxy]ethan-1-ol	54949-99-4	OCCOCCC(F)(F)C(F)(F)C(F)(F)C(F)(F)F	1	1
DTXSID00895433	1,1,1,2,2,3,3,4,4,5,5,6,6,7,7,8,8,9,9,10,10,11,11,12,12-Pentacosafluorooctacosane	93454-74-1	CCCCCCCCCCCCCCCCC(F)(F)C(F)(F)C(F)(F)C(F)(F)C(F)(F)C(F)(F)C(F)(F)C(F)(F)C(F)(F)C(F)(F)C(F)(F)C(F)(F)F	1	1
DTXSID00895438	6-(Ethenyloxy)-1,1,1,2,2,3,3,4,4-nonafluorohexane	63391-84-4	FC(F)(F)C(F)(F)C(F)(F)C(F)(F)CCOC=C	1	1
DTXSID00895453	1,1,1,2,2,3,3,4,4,5,5,6,6,7,7,8,8,9,9,10,10,11,11,12,12-Pentacosafluorodotriacontane	89109-72-8	CCCCCCCCCCCCCCCCCCCCC(F)(F)C(F)(F)C(F)(F)C(F)(F)C(F)(F)C(F)(F)C(F)(F)C(F)(F)C(F)(F)C(F)(F)C(F)(F)C(F)(F)F	1	1
DTXSID00895458	Heptadecafluorononanenitrile	82416-71-5	FC(F)(F)C(F)(F)C(F)(F)C(F)(F)C(F)(F)C(F)(F)C(F)(F)C(F)(F)C#N	1	1
DTXSID00895473	2,2,3,3,4,4,4-Heptafluorobutyl acetate	356-06-9	CC(=O)OCC(F)(F)C(F)(F)C(F)(F)F	1	1
DTXSID00895478	4,4,5,5,6,6,6-Heptafluorohexyl acetate	25600-64-0	CC(=O)OCCCC(F)(F)C(F)(F)C(F)(F)F	1	1
DTXSID00895493	2,2,3,3,4,4,4-Heptafluorobutyl carbonochloridate	108156-21-4	FC(F)(F)C(F)(F)C(F)(F)COC(Cl)=O	1	1
DTXSID00895498	3-[(Nonafluorobutyl)sulfanyl]propan-1-ol	875628-33-4	OCCCSC(F)(F)C(F)(F)C(F)(F)C(F)(F)F	1	1
DTXSID00895514	4,4,5,5,6,6,7,7,8,8,9,9,10,10,11,11,12,12,13,13,13-Henicosafluorotridecanenitrile	140834-59-9	FC(F)(F)C(F)(F)C(F)(F)C(F)(F)C(F)(F)C(F)(F)C(F)(F)C(F)(F)C(F)(F)C(F)(F)CCC#N	1	1
DTXSID00895519	Perfluorobutane-1-sulfinic acid	34642-43-8	OS(=O)C(F)(F)C(F)(F)C(F)(F)C(F)(F)F	1	1
DTXSID00895534	1,1,1,2,2,3,3,4,4,5,5,6,6,7,7,8,8,9,9,10,10,11,11,12,12,23,23,24,24,25,25,26,26,27,27,28,28,29,29,30,30,31,31,32,32,33,33,34,34,34-Pentacontafluorotetratriacontane	100550-10-5	FC(F)(F)C(F)(F)C(F)(F)C(F)(F)C(F)(F)C(F)(F)C(F)(F)C(F)(F)C(F)(F)C(F)(F)C(F)(F)C(F)(F)CCCCCCCCCCC(F)(F)C(F)(F)C(F)(F)C(F)(F)C(F)(F)C(F)(F)C(F)(F)C(F)(F)C(F)(F)C(F)(F)C(F)(F)C(F)(F)F	1	1
DTXSID00895539	6-(Ethenyloxy)-1,1,1,2,2,3,3,4,4,5,5-undecafluorohexane	595-00-6	FC(F)(F)C(F)(F)C(F)(F)C(F)(F)C(F)(F)COC=C	1	1
DTXSID00895554	Heptadecafluorononanoyl fluoride	558-95-2	FC(=O)C(F)(F)C(F)(F)C(F)(F)C(F)(F)C(F)(F)C(F)(F)C(F)(F)C(F)(F)F	1	1
DTXSID00895559	4,4,5,5,6,6,7,7,8,8,9,9,10,10,11,11,12,12,13,13,14,14,15,15,15-Pentacosafluoro-2-iodopentadecan-1-ol	80459-24-1	OCC(I)CC(F)(F)C(F)(F)C(F)(F)C(F)(F)C(F)(F)C(F)(F)C(F)(F)C(F)(F)C(F)(F)C(F)(F)C(F)(F)C(F)(F)F	1	1
DTXSID00895574	1,1,1,2,2,3,3,4,4,5,5,6,6,7,7,8,8,9,9,10,10-Henicosafluoro-11-hexacosene	1244062-18-7	CCCCCCCCCCCCCCC=CC(F)(F)C(F)(F)C(F)(F)C(F)(F)C(F)(F)C(F)(F)C(F)(F)C(F)(F)C(F)(F)C(F)(F)F	1	1
DTXSID00895579	11-(Perfluorohexyl)-10-undecen-1-ol	117543-54-1	OCCCCCCCCCC=CC(F)(F)C(F)(F)C(F)(F)C(F)(F)C(F)(F)C(F)(F)F	1	1
DTXSID00895594	(3,3,4,4,5,5,6,6,6-Nonafluorohexyl)propanedioic acid	36390-03-1	OC(=O)C(CCC(F)(F)C(F)(F)C(F)(F)C(F)(F)F)C(O)=O	1	1
DTXSID00895599	1,1,1,3,5,5,5-Heptamethyl-3-(3,3,4,4,5,5,6,6,7,7,8,8,8-tridecafluorooctyl)trisiloxane	136772-44-6	C[Si](C)(C)O[Si](C)(CCC(F)(F)C(F)(F)C(F)(F)C(F)(F)C(F)(F)C(F)(F)F)O[Si](C)(C)C	1	1
DTXSID00895610	N,N-Dibutyl-N-methylbutan-1-aminium nonafluorobutane-1-sulfonate	124472-66-8	CCCC[N+](C)(CCCC)CCCC.[O-]S(=O)(=O)C(F)(F)C(F)(F)C(F)(F)C(F)(F)F	1	1
DTXSID00895615	(1E)-1-Ethoxy-4,4,5,5,6,6,6-heptafluorohex-1-en-3-one	170118-61-3	CCO\C=C\C(=O)C(F)(F)C(F)(F)C(F)(F)F	1	1
DTXSID00895630	(3,3,4,4,5,5,6,6,7,7,8,8,9,9,10,10,11,11,12,12,12-Henicosafluorododecyl)phosphinic acid	731858-15-4	OP(=O)CCC(F)(F)C(F)(F)C(F)(F)C(F)(F)C(F)(F)C(F)(F)C(F)(F)C(F)(F)C(F)(F)C(F)(F)F	1	1
DTXSID00895635	1-(2,2,3,3,4,4,4-Heptafluorobutoxy)ethyl acetate	378-08-5	CC(OCC(F)(F)C(F)(F)C(F)(F)F)OC(C)=O	1	1
DTXSID00895650	2-(2,2,3,3,4,4,5,5,6,6,7,7,8,8,8-Pentadecafluorooctyl)oxirane	20084-49-5	FC(F)(F)C(F)(F)C(F)(F)C(F)(F)C(F)(F)C(F)(F)C(F)(F)CC1CO1	1	1
DTXSID00895655	Tetradecyl perfluorobutanoate	7365-36-8	CCCCCCCCCCCCCCOC(=O)C(F)(F)C(F)(F)C(F)(F)F	1	1
DTXSID00895670	1-Bromo-3-(tridecafluorohexyl)benzene	157829-77-1	FC(F)(F)C(F)(F)C(F)(F)C(F)(F)C(F)(F)C(F)(F)C1=CC(Br)=CC=C1	1	1
DTXSID00895675	Tris(3,3,4,4,5,5,6,6,6-nonafluorohexyl)(phenyl)stannane	240497-36-3	FC(F)(F)C(F)(F)C(F)(F)C(F)(F)CC[Sn](CCC(F)(F)C(F)(F)C(F)(F)C(F)(F)F)(CCC(F)(F)C(F)(F)C(F)(F)C(F)(F)F)C1=CC=CC=C1	1	1
DTXSID00895690	2,2,3,3,4,4,4-Heptafluoro-N-propylbutanamide	75668-24-5	CCCNC(=O)C(F)(F)C(F)(F)C(F)(F)F	1	1
DTXSID00895695	Difluoro[1,1,2,2-tetrafluoro-2-(nonafluorobutoxy)ethoxy]acetyl fluoride	172897-75-5	FC(=O)C(F)(F)OC(F)(F)C(F)(F)OC(F)(F)C(F)(F)C(F)(F)C(F)(F)F	1	1
DTXSID00895711	1-Bromo-3-(3,3,4,4,5,5,6,6,7,7,8,8,9,9,10,10,10-heptadecafluorodecyl)benzene	340157-97-3	FC(F)(F)C(F)(F)C(F)(F)C(F)(F)C(F)(F)C(F)(F)C(F)(F)C(F)(F)CCC1=CC=CC(Br)=C1	1	1
DTXSID00895716	6-(Heptafluoropropyl)pyridin-3-amine	317810-57-4	NC1=CN=C(C=C1)C(F)(F)C(F)(F)C(F)(F)F	1	1
DTXSID00895731	5-(Heptafluoropropyl)-1-methylisoquinoline	28439-77-2	CC1=NC=CC2=C(C=CC=C12)C(F)(F)C(F)(F)C(F)(F)F	1	1
DTXSID00895736	[(Nonafluorobutyl)disulfanyl]benzene	1606997-42-5	FC(F)(F)C(F)(F)C(F)(F)C(F)(F)SSC1=CC=CC=C1	1	1
DTXSID00895751	2,2,3,3,4,4,4-Heptafluoro-N,N-bis(2-methylpropyl)butanamide	336-30-1	CC(C)CN(CC(C)C)C(=O)C(F)(F)C(F)(F)C(F)(F)F	1	1
DTXSID00895756	Methyl 3-amino-4,4,5,5,6,6,6-heptafluoro-2-hexenoate	106203-17-2	COC(=O)C=C(N)C(F)(F)C(F)(F)C(F)(F)F	1	1
DTXSID00895913	N,N-Diethyl-2,2,3,3,4,4,5,5,5-nonafluoropentanamide	158018-94-1	CCN(CC)C(=O)C(F)(F)C(F)(F)C(F)(F)C(F)(F)F	1	1
DTXSID00895918	2,2,3,3,4,4,4-Heptafluoro-N-hexylbutanamide	75668-28-9	CCCCCCNC(=O)C(F)(F)C(F)(F)C(F)(F)F	1	1
DTXSID00895933	N,N-Dimethyl-4-(tridecafluorohexyl)aniline	141822-33-5	CN(C)C1=CC=C(C=C1)C(F)(F)C(F)(F)C(F)(F)C(F)(F)C(F)(F)C(F)(F)F	1	1
DTXSID00895938	N-Ethyl-2,2,3,3,4,4,5,5,5-nonafluoropentanamide	158018-93-0	CCNC(=O)C(F)(F)C(F)(F)C(F)(F)C(F)(F)F	1	1
DTXSID00895953	Ethyl 4,4,5,5,6,6,6-heptafluoro-3-(nitromethyl)hexanoate	376-88-5	CCOC(=O)CC(C[N+]([O-])=O)C(F)(F)C(F)(F)C(F)(F)F	1	1
DTXSID00895958	4-(Nonafluorobutyl)-1,3-dioxolan-2-one	1469980-27-5	FC(F)(F)C(F)(F)C(F)(F)C(F)(F)C1COC(=O)O1	1	1
DTXSID00895973	N-Dodecyl-2,2,3,3,4,4,4-heptafluorobutanamide	2284-51-7	CCCCCCCCCCCCNC(=O)C(F)(F)C(F)(F)C(F)(F)F	1	1
DTXSID00895978	Ethyl 3,3,4,4,5,5,6,6,7,7,8,8,9,9,10,10,10-heptadecafluoro-2,2-dihydroxydecanoate	1401315-53-4	CCOC(=O)C(O)(O)C(F)(F)C(F)(F)C(F)(F)C(F)(F)C(F)(F)C(F)(F)C(F)(F)C(F)(F)F	1	1
DTXSID00895993	2-(Nonafluorobutyl)-1-benzothiophene	1608112-38-4	FC(F)(F)C(F)(F)C(F)(F)C(F)(F)C1=CC2=CC=CC=C2S1	1	1
DTXSID00895998	2-(Nonafluorobutyl)-1-benzofuran	1608112-36-2	FC(F)(F)C(F)(F)C(F)(F)C(F)(F)C1=CC2=CC=CC=C2O1	1	1
DTXSID00896001	3-[(2,2,3,3,4,4,5,5,6,6,7,7,7-Tridecafluoroheptyl)amino]phenol	1441382-30-4	OC1=CC=CC(NCC(F)(F)C(F)(F)C(F)(F)C(F)(F)C(F)(F)C(F)(F)F)=C1	1	1
DTXSID00896006	4-(2,2,3,3,4,4,5,5,6,6,7,7,7-Tridecafluoroheptyl)-1,3-dioxolan-2-one	114810-52-5	FC(F)(F)C(F)(F)C(F)(F)C(F)(F)C(F)(F)C(F)(F)CC1COC(=O)O1	1	1
DTXSID00896021	5-(Heptafluoropropyl)-3-phenyl-1H-1,2,4-triazole	2195-67-7	FC(F)(F)C(F)(F)C(F)(F)C1=NC(=NN1)C1=CC=CC=C1	1	1
DTXSID00896026	5-(Henicosafluorodecyl)-1H-imidazole	81769-57-5	FC(F)(F)C(F)(F)C(F)(F)C(F)(F)C(F)(F)C(F)(F)C(F)(F)C(F)(F)C(F)(F)C(F)(F)C1=CN=CN1	1	1
DTXSID00896041	4-[(3,3,4,4,5,5,6,6,7,7,8,8,9,9,10,10,10-Heptadecafluorodecyl)oxy]benzoic acid	188034-84-6	OC(=O)C1=CC=C(OCCC(F)(F)C(F)(F)C(F)(F)C(F)(F)C(F)(F)C(F)(F)C(F)(F)C(F)(F)F)C=C1	1	1
DTXSID00896046	3-(Heptadecafluorooctyl)oxan-2-ol	169213-95-0	OC1OCCCC1C(F)(F)C(F)(F)C(F)(F)C(F)(F)C(F)(F)C(F)(F)C(F)(F)C(F)(F)F	1	1
DTXSID00896061	2,2,3,3,4,4,4-Heptafluoro-N-(3-fluorophenyl)butanamide	332031-88-6	FC1=CC(NC(=O)C(F)(F)C(F)(F)C(F)(F)F)=CC=C1	1	1
DTXSID00896066	N-Dodecyl-2,2,3,3,4,4,5,5,6,6,7,7,8,8,8-pentadecafluorooctanamide	37696-86-9	CCCCCCCCCCCCNC(=O)C(F)(F)C(F)(F)C(F)(F)C(F)(F)C(F)(F)C(F)(F)C(F)(F)F	1	1
DTXSID00896081	Ethyl 3-[(2-ethoxy-2-oxoethyl)amino]-4,4,5,5,6,6,7,7,7-nonafluoroheptanoate	132114-64-8	CCOC(=O)CNC(CC(=O)OCC)C(F)(F)C(F)(F)C(F)(F)C(F)(F)F	1	1
DTXSID00896086	N,N-Diethyl-1,1,2,2,3,3,4,4,5,5,6,6,6-tridecafluorohexane-1-sulfonamide	1270179-93-5	CCN(CC)S(=O)(=O)C(F)(F)C(F)(F)C(F)(F)C(F)(F)C(F)(F)C(F)(F)F	1	1
DTXSID00896102	3,4,4-Trifluoro-3-(heptafluoropropyl)-1,2lambda~6~-oxathietane-2,2-dione	156465-44-0	FC(F)(F)C(F)(F)C(F)(F)C1(F)C(F)(F)OS1(=O)=O	1	1
DTXSID00896107	1-Methyl-2-(nonafluorobutyl)-1H-indole	1608112-35-1	CN1C(=CC2=CC=CC=C12)C(F)(F)C(F)(F)C(F)(F)C(F)(F)F	1	1
DTXSID00896122	5-(Heptafluoropropyl)-6-methylpyrimidine-2,4(1H,3H)-dione	145663-05-4	CC1=C(C(=O)NC(=O)N1)C(F)(F)C(F)(F)C(F)(F)F	1	1
DTXSID00896127	4'-[(12,12,13,13,14,14,15,15,16,16,17,17,18,18,19,19,19-Heptadecafluorononadecyl)oxy][1,1'-biphenyl]-4-carbonitrile	117750-26-2	FC(F)(F)C(F)(F)C(F)(F)C(F)(F)C(F)(F)C(F)(F)C(F)(F)C(F)(F)CCCCCCCCCCCOC1=CC=C(C=C1)C1=CC=C(C=C1)C#N	1	1
DTXSID00896142	2,2,3,3,4,4,5,5,6,6,7,7,8,8,9,9,9-Heptadecafluoro-N-phenylnonanamide	313366-93-7	FC(F)(F)C(F)(F)C(F)(F)C(F)(F)C(F)(F)C(F)(F)C(F)(F)C(F)(F)C(=O)NC1=CC=CC=C1	1	1
DTXSID00896147	1-Chloro-4-(1,1,2,2,3,3,4,4,5,5,6,6,6-tridecafluorohexane-1-sulfonyl)benzene	76848-59-4	FC(F)(F)C(F)(F)C(F)(F)C(F)(F)C(F)(F)C(F)(F)S(=O)(=O)C1=CC=C(Cl)C=C1	1	1
DTXSID00896162	2,4-Dimethoxy-5-(nonafluorobutyl)pyrimidine	71623-69-3	COC1=NC(OC)=C(C=N1)C(F)(F)C(F)(F)C(F)(F)C(F)(F)F	1	1
DTXSID00896167	N-Cyclohexyl-2,2,3,3,4,4,5,5,6,6,7,7,8,8,9,9,9-heptadecafluorononanamide	73602-46-7	FC(F)(F)C(F)(F)C(F)(F)C(F)(F)C(F)(F)C(F)(F)C(F)(F)C(F)(F)C(=O)NC1CCCCC1	1	1
DTXSID00896182	2,2,3,3,4,4,5,5,6,6,7,7,8,8,9,9,9-Heptadecafluoro-N-(2-fluorophenyl)nonanamide	344282-15-1	FC1=CC=CC=C1NC(=O)C(F)(F)C(F)(F)C(F)(F)C(F)(F)C(F)(F)C(F)(F)C(F)(F)C(F)(F)F	1	1
DTXSID00896187	4,6-Bis[(2,2,3,3,4,4,5,5,6,6,7,7,7-tridecafluoroheptyl)oxy]-1,3,5-triazin-2-amine	57338-64-4	NC1=NC(OCC(F)(F)C(F)(F)C(F)(F)C(F)(F)C(F)(F)C(F)(F)F)=NC(OCC(F)(F)C(F)(F)C(F)(F)C(F)(F)C(F)(F)C(F)(F)F)=N1	1	1
DTXSID00896203	N'-[(4-Ethylphenyl)methylidene]-2,2,3,3,4,4,5,5,6,6,7,7,7-tridecafluoroheptanehydrazide	445258-05-9	CCC1=CC=C(C=NNC(=O)C(F)(F)C(F)(F)C(F)(F)C(F)(F)C(F)(F)C(F)(F)F)C=C1	1	1
DTXSID00896208	2,2,3,3,4,4,5,5,6,6,7,7,7-Tridecafluoro-N-(4-nitrophenyl)heptanamide	164796-44-5	[O-][N+](=O)C1=CC=C(NC(=O)C(F)(F)C(F)(F)C(F)(F)C(F)(F)C(F)(F)C(F)(F)F)C=C1	1	1
DTXSID00896223	N-[5-(Heptafluoropropyl)[1,1'-biphenyl]-2-yl]benzamide	748785-00-4	FC(F)(F)C(F)(F)C(F)(F)C1=CC=C(NC(=O)C2=CC=CC=C2)C(=C1)C1=CC=CC=C1	1	1
DTXSID00896228	3-Phenyl-5-(tridecafluorohexyl)-1,2,4-oxadiazole	146304-76-9	FC(F)(F)C(F)(F)C(F)(F)C(F)(F)C(F)(F)C(F)(F)C1=NC(=NO1)C1=CC=CC=C1	1	1
DTXSID00896243	3-(Nonafluorobutyl)-1-phenyl-1H-pyrazol-5-ol	96146-02-0	OC1=CC(=NN1C1=CC=CC=C1)C(F)(F)C(F)(F)C(F)(F)C(F)(F)F	1	1
DTXSID00896248	N'-[(2E)-5,5,6,6,7,7,7-Heptafluoro-4-oxohept-2-en-2-yl]-3-methoxybenzohydrazide	1164461-08-8	COC1=CC(=CC=C1)C(=O)NN\C(C)=C\C(=O)C(F)(F)C(F)(F)C(F)(F)F	1	1
DTXSID00896263	4-Acetamido-3-chlorophenyl nonafluorobutane-1-sulfonate	1428370-26-6	CC(=O)NC1=CC=C(OS(=O)(=O)C(F)(F)C(F)(F)C(F)(F)C(F)(F)F)C=C1Cl	1	1
DTXSID00896268	1-{4-[(2H-1,3-Benzodioxol-5-yl)methyl]piperazin-1-yl}-2,2,3,3,4,4,4-heptafluorobutan-1-one	546063-97-2	FC(F)(F)C(F)(F)C(F)(F)C(=O)N1CCN(CC2=CC=C3OCOC3=C2)CC1	1	1
DTXSID00896283	6-[(4,6-Dimethylpyrimidin-2-yl)sulfanyl]-3-(heptafluoropropyl)[1,2,4]triazolo[4,3-b]pyridazine	351346-36-6	CC1=CC(C)=NC(SC2=NN3C(C=C2)=NN=C3C(F)(F)C(F)(F)C(F)(F)F)=N1	1	1
DTXSID00896288	N-[5-(2-Chloro-1,1,2-trifluoroethoxy)-2-hydroxy-4-{2-[3-(pentadecyloxy)phenoxy]butanamido}phenyl]-2,2,3,3,4,4,4-heptafluorobutanamide	92589-42-9	CCCCCCCCCCCCCCCOC1=CC(OC(CC)C(=O)NC2=CC(O)=C(NC(=O)C(F)(F)C(F)(F)C(F)(F)F)C=C2OC(F)(F)C(F)Cl)=CC=C1	1	1
DTXSID00896304	(1Z)-1,2,3,4,4,4-Hexafluoro-1-iodo-3-(trifluoromethyl)but-1-ene	105774-97-8	F\C(I)=C(\F)C(F)(C(F)(F)F)C(F)(F)F	1	1
DTXSID00896309	2,3,3,3-Tetrafluoro-2-(trifluoromethyl)propanamide	662-20-4	NC(=O)C(F)(C(F)(F)F)C(F)(F)F	1	1
DTXSID00896324	1,1,1,2,3,3,4,4,5,5,6,6,7,7,8,8,9,9,10,10-Icosafluoro-12-iodo-2-(trifluoromethyl)dodecane	242142-80-9	FC(F)(F)C(F)(C(F)(F)F)C(F)(F)C(F)(F)C(F)(F)C(F)(F)C(F)(F)C(F)(F)C(F)(F)C(F)(F)CCI	1	1
DTXSID00896329	2-(1,1,1,2,3,3,3-Heptafluoropropan-2-yl)-1H-imidazole	81790-00-3	FC(F)(F)C(F)(C1=NC=CN1)C(F)(F)F	1	1
DTXSID00896344	3,4,4,4-Tetrafluoro-1-phenyl-3-(trifluoromethyl)butan-1-one	82959-21-5	FC(F)(F)C(F)(CC(=O)C1=CC=CC=C1)C(F)(F)F	1	1
DTXSID00896349	1-Amino-4,4,5,5,6,6,7,7,8,9,9,9-dodecafluoro-8-(trifluoromethyl)nonan-2-ol	58935-89-0	NCC(O)CC(F)(F)C(F)(F)C(F)(F)C(F)(F)C(F)(C(F)(F)F)C(F)(F)F	1	1
DTXSID00896364	1,1,1,2,4,5,6,7,7,7-Decafluoro-2,6-bis(trifluoromethyl)-4-hepten-3-one	235772-91-5	FC(=C(F)C(F)(C(F)(F)F)C(F)(F)F)C(=O)C(F)(C(F)(F)F)C(F)(F)F	1	1
DTXSID00896369	1,2,4,5-Tetrafluoro-3-(1,1,1,2,3,3,3-heptafluoropropan-2-yl)-6-(trichloromethyl)benzene	136264-73-8	FC1=C(F)C(=C(F)C(F)=C1C(Cl)(Cl)Cl)C(F)(C(F)(F)F)C(F)(F)F	1	1
DTXSID00896384	2-Bromo-6-(difluoromethoxy)-4-(1,1,1,2,3,3,3-heptafluoropropan-2-yl)aniline	1262665-49-5	NC1=C(OC(F)F)C=C(C=C1Br)C(F)(C(F)(F)F)C(F)(F)F	1	1
DTXSID00896389	4-(1,1,1,2,3,3,3-Heptafluoropropan-2-yl)-2-methyl-3-(methylsulfanyl)benzoic acid	1355553-97-7	CSC1=C(C)C(=CC=C1C(F)(C(F)(F)F)C(F)(F)F)C(O)=O	1	1
DTXSID00896400	3-(tert-Butylsulfanyl)-4-(1,1,1,2,3,3,3-heptafluoropropan-2-yl)-2-methylbenzoic acid	1355554-16-3	CC1=C(SC(C)(C)C)C(=CC=C1C(O)=O)C(F)(C(F)(F)F)C(F)(F)F	1	1
DTXSID00896405	2-Ethyl-4-(1,1,1,2,3,3,3-heptafluoropropan-2-yl)-3-(propylsulfanyl)benzoic acid	1355554-68-5	CCCSC1=C(CC)C(=CC=C1C(F)(C(F)(F)F)C(F)(F)F)C(O)=O	1	1
DTXSID00896420	Methyl 4-{[1,1,1,4,5,5,5-heptafluoro-3-(1,1,1,2,3,3,3-heptafluoropropan-2-yl)-4-(trifluoromethyl)pent-2-en-2-yl]oxy}benzoate	66432-83-5	COC(=O)C1=CC=C(OC(=C(C(F)(C(F)(F)F)C(F)(F)F)C(F)(C(F)(F)F)C(F)(F)F)C(F)(F)F)C=C1	1	1
DTXSID00896425	4-(1,1,1,2,3,3,3-Heptafluoropropan-2-yl)-2-methyl-3-(2-methylpropane-2-sulfinyl)benzoic acid	1355554-39-0	CC1=C(C(=CC=C1C(O)=O)C(F)(C(F)(F)F)C(F)(F)F)S(=O)C(C)(C)C	1	1
DTXSID00896440	4-(1,1,1,2,3,3,3-Heptafluoropropan-2-yl)-2-methyl-3-(2-methylpropane-1-sulfonyl)benzoic acid	1355554-54-9	CC(C)CS(=O)(=O)C1=C(C)C(=CC=C1C(F)(C(F)(F)F)C(F)(F)F)C(O)=O	1	1
DTXSID00896445	3-(Butane-1-sulfinyl)-2-ethyl-4-(1,1,1,2,3,3,3-heptafluoropropan-2-yl)benzoic acid	1355554-97-0	CCCCS(=O)C1=C(CC)C(=CC=C1C(F)(C(F)(F)F)C(F)(F)F)C(O)=O	1	1
DTXSID00896460	3-(2-Chloro-4-fluorobenzamido)-2-fluoro-N-[4-(1,1,1,2,3,3,3-heptafluoropropan-2-yl)-2,6-dimethylphenyl]benzamide	862133-15-1	CC1=CC(=CC(C)=C1NC(=O)C1=C(F)C(NC(=O)C2=CC=C(F)C=C2Cl)=CC=C1)C(F)(C(F)(F)F)C(F)(F)F	1	1
DTXSID00896465	2,4-Difluoro-N-(2-fluoro-3-{[4-(1,1,1,2,3,3,3-heptafluoropropan-2-yl)-2,6-dimethylphenyl]carbamoyl}phenyl)-N-methylbenzamide	862134-26-7	CN(C(=O)C1=CC=C(F)C=C1F)C1=CC=CC(C(=O)NC2=C(C)C=C(C=C2C)C(F)(C(F)(F)F)C(F)(F)F)=C1F	1	1
DTXSID00896480	1,1,2,2,3,3,4,4,5,5,6,6-Dodecafluoro-7-(trifluoromethoxy)heptane	1737-33-3	FC(F)C(F)(F)C(F)(F)C(F)(F)C(F)(F)C(F)(F)COC(F)(F)F	1	1
DTXSID00896485	(4-Bromophenyl){5-[difluoro(trifluoromethoxy)methyl]-5-hydroxy-3-methyl-4,5-dihydro-1H-pyrazol-1-yl}methanone	722470-55-5	CC1=NN(C(=O)C2=CC=C(Br)C=C2)C(O)(C1)C(F)(F)OC(F)(F)F	1	1
DTXSID00896501	4,5,5,5-Tetrafluoro-4-(heptafluoropropoxy)pentanoic acid	243128-40-7	OC(=O)CCC(F)(OC(F)(F)C(F)(F)C(F)(F)F)C(F)(F)F	1	1
DTXSID00896506	2-Methylpropyl 2,3,3,3-tetrafluoro-2-(heptafluoropropoxy)propanoate	183873-54-3	CC(C)COC(=O)C(F)(OC(F)(F)C(F)(F)C(F)(F)F)C(F)(F)F	1	1
DTXSID00896521	2-Ethylhexyl 2,3,3,3-tetrafluoro-2-(heptafluoropropoxy)propanoate	340034-61-9	CCCCC(CC)COC(=O)C(F)(OC(F)(F)C(F)(F)C(F)(F)F)C(F)(F)F	1	1
DTXSID00896526	1,1,1,2,2,3,3,5,6,6,8,9,9,11,12,14,14,15,17,17,18,20,20,21,21,22,22,22-Octacosafluoro-5,8,11,12,15,18-hexakis(trifluoromethyl)-4,7,10,13,16,19-hexaoxadocosane	61098-01-9	FC(F)(F)C(F)(F)C(F)(F)OC(F)(C(F)(F)F)C(F)(F)OC(F)(C(F)(F)F)C(F)(F)OC(F)(C(F)(F)F)C(F)(OC(F)(F)C(F)(OC(F)(F)C(F)(OC(F)(F)C(F)(F)C(F)(F)F)C(F)(F)F)C(F)(F)F)C(F)(F)F	1	1
DTXSID00896541	N,N-Diethyl-2,3,3,3-tetrafluoro-2-[1,1,2,3,3,3-hexafluoro-2-(heptafluoropropoxy)propoxy]propanamide	176702-74-2	CCN(CC)C(=O)C(F)(OC(F)(F)C(F)(OC(F)(F)C(F)(F)C(F)(F)F)C(F)(F)F)C(F)(F)F	1	1
DTXSID00896546	Cyclohexyl 2,3,3,3-tetrafluoro-2-[1,1,2,3,3,3-hexafluoro-2-(heptafluoropropoxy)propoxy]propanoate	145510-90-3	FC(F)(F)C(F)(F)C(F)(F)OC(F)(C(F)(F)F)C(F)(F)OC(F)(C(=O)OC1CCCCC1)C(F)(F)F	1	1
DTXSID00896561	2-(2-Chloro-1,1,2-trifluoro-2-iodoethoxy)-1,1,1,2,3,3,3-heptafluoropropane	16031-04-2	FC(F)(F)C(F)(OC(F)(F)C(F)(Cl)I)C(F)(F)F	1	1
DTXSID00896566	33,33,34,34,35,35,36,36,37,37,38,38,39,39,40,40,41,41,42,42,43,43,44,44,44-Pentacosafluoro-2,5,8,11,14,17,20,23,26,29-decaoxatetratetracontan-31-ol	93776-06-8	COCCOCCOCCOCCOCCOCCOCCOCCOCCOCC(O)CC(F)(F)C(F)(F)C(F)(F)C(F)(F)C(F)(F)C(F)(F)C(F)(F)C(F)(F)C(F)(F)C(F)(F)C(F)(F)C(F)(F)F	1	1
DTXSID00896607	1-{Difluoro[(trifluoroethenyl)oxy]methoxy}-1,2,2-trifluoroethene	13845-92-6	FC(F)=C(F)OC(F)(F)OC(F)=C(F)F		1
DTXSID00896627	Potassium perfluoroheptanoate	21049-36-5	[K+].[O-]C(=O)C(F)(F)C(F)(F)C(F)(F)C(F)(F)C(F)(F)C(F)(F)F	1	1
DTXSID00896642	Potassium 2,3,3,3-tetrafluoro-2-(trifluoromethyl)propanoate	95091-35-3	[K+].[O-]C(=O)C(F)(C(F)(F)F)C(F)(F)F	1	1
DTXSID00896647	Potassium 2,3,3,3-tetrafluoro-2-(heptafluoropropoxy)propanoate	67118-55-2	[K+].[O-]C(=O)C(F)(OC(F)(F)C(F)(F)C(F)(F)F)C(F)(F)F	1	1
DTXSID00896662	(5E)-1,1,1,2,2,3,3,4,4-Nonafluorodec-5-ene	131294-67-2	CCCC\C=C\C(F)(F)C(F)(F)C(F)(F)C(F)(F)F	1	1
DTXSID00896667	(2E)-4,4,5,5,6,6,7,7,7-Nonafluorohept-2-en-1-ol	83706-96-1	OC\C=C\C(F)(F)C(F)(F)C(F)(F)C(F)(F)F	1	1
DTXSID00896682	(1Z)-1,2,3,3,4,4,5,5,6,6,7,7,8,8,9,9,10,10,10-Nonadecafluoro-1-iododec-1-ene	56184-40-8	F\C(I)=C(\F)C(F)(F)C(F)(F)C(F)(F)C(F)(F)C(F)(F)C(F)(F)C(F)(F)C(F)(F)F	1	1
DTXSID00896687	(7E)-1,1,1,2,2,3,3,4,4,5,5,6,6,9,9,10,10,11,11,12,12,13,13,14,14,15,15,16,16,16-Triacontafluorohexadec-7-ene	51249-68-4	FC(F)(F)C(F)(F)C(F)(F)C(F)(F)C(F)(F)C(F)(F)\C=C\C(F)(F)C(F)(F)C(F)(F)C(F)(F)C(F)(F)C(F)(F)C(F)(F)C(F)(F)F	1	1
DTXSID00896703	(3,3,4,4,5,5,6,6,7,7,8,8,9,9,10,10,11,11,12,12,13,13,14,14,14-Pentacosafluorotetradecyl)phosphonic acid	147290-12-8	OP(O)(=O)CCC(F)(F)C(F)(F)C(F)(F)C(F)(F)C(F)(F)C(F)(F)C(F)(F)C(F)(F)C(F)(F)C(F)(F)C(F)(F)C(F)(F)F	1	1
DTXSID00896708	Diethyl (3,3,4,4,5,5,6,6,7,7,8,8,9,9,10,10,11,11,12,12,12-henicosafluorododecyl)phosphonate	854095-13-9	CCOP(=O)(CCC(F)(F)C(F)(F)C(F)(F)C(F)(F)C(F)(F)C(F)(F)C(F)(F)C(F)(F)C(F)(F)C(F)(F)F)OCC	1	1
DTXSID00896723	11-(Nonafluorobutyl)-9,10-dihydro-9,10-(epithiomethano)anthracene	267648-90-8	FC(F)(F)C(F)(F)C(F)(F)C(F)(F)C1SC2C3=C(C=CC=C3)C1C1=C2C=CC=C1	1	1
DTXSID00896728	N-(2,2,3,3,4,4,5,5,6,6,7,7,8,8,8-Pentadecafluorooctyl)-P,P-bis(pentafluorophenyl)phosphinous amide	518358-34-4	FC1=C(F)C(F)=C(P(NCC(F)(F)C(F)(F)C(F)(F)C(F)(F)C(F)(F)C(F)(F)C(F)(F)F)C2=C(F)C(F)=C(F)C(F)=C2F)C(F)=C1F	1	1
DTXSID00896743	(4E)-1,1,1,2,4,5,6,7,7,7-Decafluoro-2,6-bis(trifluoromethyl)hept-4-en-3-one	134330-91-9	F\C(=C(\F)C(F)(C(F)(F)F)C(F)(F)F)C(=O)C(F)(C(F)(F)F)C(F)(F)F	1	1
DTXSID00896748	1-{[1-(1,2-Dibromo-1,2,2-trifluoroethoxy)-1,1,2,3,3,3-hexafluoropropan-2-yl]oxy}-1,1,2,2,3,3,3-heptafluoropropane	115783-72-7	FC(F)(F)C(F)(F)C(F)(F)OC(F)(C(F)(F)F)C(F)(F)OC(F)(Br)C(F)(F)Br	1	1
DTXSID00896824	Bis(2,2,3,3,4,4,4-heptafluorobutyl) carbonate	1026739-75-2	FC(F)(F)C(F)(F)C(F)(F)COC(=O)OCC(F)(F)C(F)(F)C(F)(F)F	1	1
DTXSID00896965	Perfluorobutanesulfinyl chloride	41006-41-1	FC(F)(F)C(F)(F)C(F)(F)C(F)(F)S(Cl)=O	1	1
DTXSID00896980	N,N-Diethylethanaminium heptadecafluorononanoate	327176-80-7	CC[NH+](CC)CC.[O-]C(=O)C(F)(F)C(F)(F)C(F)(F)C(F)(F)C(F)(F)C(F)(F)C(F)(F)C(F)(F)F	1	1
DTXSID00896985	3-(Perfluoropropyl)-2-iodopropanol acetate	3108-05-2	CC(=O)OCC(I)CC(F)(F)C(F)(F)C(F)(F)F	1	1
DTXSID00897013	Tris(1H,1H,2H,2H-perfluorohexyl) phosphate	1887067-55-1	FC(F)(F)C(F)(F)C(F)(F)C(F)(F)CCOP(=O)(OCCC(F)(F)C(F)(F)C(F)(F)C(F)(F)F)OCCC(F)(F)C(F)(F)C(F)(F)C(F)(F)F	1	1
DTXSID00897018	N,N'-bis(Perfluorobutanoyl)1,3-propanediamine	149981-59-9	FC(F)(F)C(F)(F)C(F)(F)C(=O)NCCCNC(=O)C(F)(F)C(F)(F)C(F)(F)F	1	1
DTXSID00897033	(2-Naphthalenyl)perfluorobutanamide	582-00-3	FC(F)(F)C(F)(F)C(F)(F)C(=O)NC1=CC2=CC=CC=C2C=C1	1	1
DTXSID00897093	Thymidine, 5'-O-[[4-(1H,1H,2H,2H-perfluorodecyl)phenyl]bis(4-methoxyphenyl)methyl]-, 3'-[2-cyanoethyl N,N-bis(1-methylethyl)phosphoramidite]	902456-09-1	COC1=CC=C(C=C1)C(OC[C@H]1O[C@H](C[C@@H]1OP(OCCC#N)N(C(C)C)C(C)C)N1C=C(C)C(=O)NC1=O)(C1=CC=C(CCC(F)(F)C(F)(F)C(F)(F)C(F)(F)C(F)(F)C(F)(F)C(F)(F)C(F)(F)F)C=C1)C1=CC=C(OC)C=C1	1	1
DTXSID00897098	N-(Perfluoro-1-oxobutyl)aspartic acid 1-butyl ester	88434-83-7	CCCCOC(O)[C@H](CC(O)=O)NC(=O)C(F)(F)C(F)(F)C(F)(F)F	1	1
DTXSID00897154	N-(Perfluorobutanoyl)glutamic acid 1-ethyl ester	88435-87-4	CCOC(=O)[C@@H](CCC(O)=O)NC(=O)C(F)(F)C(F)(F)C(F)(F)F	1	1
DTXSID00897295	Erbium, tris(6,6,7,7,8,8,8-heptafluoro-2,2-dimethyl-3,5-octanedionato-βO3,βO5)-	17978-75-5	[Er+3].CC(C)(C)C(\[O-])=C\C(=O)C(F)(F)C(F)(F)C(F)(F)F.CC(C)(C)C(\[O-])=C\C(=O)C(F)(F)C(F)(F)C(F)(F)F.CC(C)(C)C(\[O-])=C\C(=O)C(F)(F)C(F)(F)C(F)(F)F	1	1
DTXSID00897472	N,N'-(Methylenedi-1,4-phenylene)bis(perfluorobutanamide)	124232-75-3	FC(F)(F)C(F)(F)C(F)(F)C(=O)NC1=CC=C(CC2=CC=C(NC(=O)C(F)(F)C(F)(F)C(F)(F)F)C=C2)C=C1	1	1
DTXSID00897477	(17β)-3-[(Trimethylsilyl)oxy]estra-1,3,5(10)-trien-17-ol perfluorobutanoate	120623-45-2	[H][C@@]1(CC[C@@]2([H])[C@]3([H])CCC4=CC(O[Si](C)(C)C)=CC=C4[C@@]3([H])CC[C@]12C)OC(=O)C(F)(F)C(F)(F)C(F)(F)F	1	1
DTXSID00897492	(E)-Perfluoro-4-methylpent-2-enoyl fluoride	103229-77-2	FC(=O)C(\F)=C(/F)C(F)(C(F)(F)F)C(F)(F)F	1	1
DTXSID00897497	(3β,7β)-25,26,26,26,27,27,27-Heptafluorocholest-5-ene-3,7-diol	240129-42-4	[H]C(C)(CCCC(F)(C(F)(F)F)C(F)(F)F)[C@@]1([H])CC[C@@]2([H])[C@]3([H])[C@@]([H])(O)C=C4C[C@@]([H])(O)CC[C@]4(C)[C@@]3([H])CC[C@]12C	1	1
DTXSID00897513	Potassium bis(perfluorohexyl)difluoroborate	937038-66-9	[K+].F[B-](F)(C(F)(F)C(F)(F)C(F)(F)C(F)(F)C(F)(F)C(F)(F)F)C(F)(F)C(F)(F)C(F)(F)C(F)(F)C(F)(F)C(F)(F)F	1	1
DTXSID00897518	Chromium pentacarbonyl[perfluoro-4-(isocyano-βC)butane]	106065-05-8	[Cr].[C-]#[O+].[C-]#[O+].[C-]#[O+].[C-]#[O+].[C-]#[O+].FC(F)(F)C(F)(F)C(F)(F)C(F)(F)[N+]#[C-]	1	1
DTXSID00897553	1H,1H,2H,2H-Perfluorooctanol sulfate ammonium salt	63225-56-9	[NH4+].[O-]S(=O)(=O)OCCC(F)(F)C(F)(F)C(F)(F)C(F)(F)C(F)(F)C(F)(F)F	1	1
DTXSID00897573	2-Chloro-N-[3-[[[2,6-dimethyl-4-[1,2,2,2-tetrafluoro-1-(trifluoromethyl)ethyl]phenyl]amino]carbonyl]-2-fluorophenyl]-N-methyl-3-pyridinecarboxamide	862134-31-4	CN(C(=O)C1=C(Cl)N=CC=C1)C1=CC=CC(C(=O)NC2=C(C)C=C(C=C2C)C(F)(C(F)(F)F)C(F)(F)F)=C1F	1
DTXSID00897715	N,N'-1,2-phenylenebis(perfluorobutanamide)	548479-70-5	FC(F)(F)C(F)(F)C(F)(F)C(=O)NC1=C(NC(=O)C(F)(F)C(F)(F)C(F)(F)F)C=CC=C1	1	1
DTXSID00904574	Perfluorododecanesulfonate	343629-43-6	[O-]S(=O)(=O)C(F)(F)C(F)(F)C(F)(F)C(F)(F)C(F)(F)C(F)(F)C(F)(F)C(F)(F)C(F)(F)C(F)(F)C(F)(F)C(F)(F)F	1
DTXSID00904579	Perfluorotridecanesulfonate	NOCAS_904579	[O-]S(=O)(=O)C(F)(F)C(F)(F)C(F)(F)C(F)(F)C(F)(F)C(F)(F)C(F)(F)C(F)(F)C(F)(F)C(F)(F)C(F)(F)C(F)(F)C(F)(F)F	1
DTXSID00904751	1,1,2,2-Tetrafluoro-2-{[1,1,1,2,3,3-hexafluoro-3-(1,2,2-trifluoro-2-sulfoethoxy)propan-2-yl]oxy}ethane-1-sulfonic acid	916340-65-3	OS(=O)(=O)C(F)(F)C(F)OC(F)(F)C(F)(OC(F)(F)C(F)(F)S(O)(=O)=O)C(F)(F)F	1
DTXSID00905384	2-Fluoro-4-(1,1,2,2-tetrafluoroethanesulfinyl)aniline	100331-02-0	NC1=C(F)C=C(C=C1)S(=O)C(F)(F)C(F)F	1
DTXSID00906336	2,3-Dibromo-6-(1,1,1,3,3,3-hexafluoro-2-hydroxypropan-2-yl)-3,5,5-trimethylcyclohexan-1-one	101564-40-3	CC1(C)CC(C)(Br)C(Br)C(=O)C1C(O)(C(F)(F)F)C(F)(F)F	1
DTXSID00906679	9-(2,2,3,3-Tetrafluorocyclobutyl)nonanoic acid	101832-26-2	OC(=O)CCCCCCCCC1CC(F)(F)C1(F)F	1
DTXSID00906891	1,1,1,7,7,7-Hexafluoro-6-hydroxy-4-oxo-2,6-bis(trifluoromethyl)heptan-2-yl acetate	101952-35-6	CC(=O)OC(CC(=O)CC(O)(C(F)(F)F)C(F)(F)F)(C(F)(F)F)C(F)(F)F	1
DTXSID00907606	2,2,3,3-Tetrafluorooctahydro-5,8-methano-1,4-benzodithiine	102489-64-5	FC1(F)SC2C3CCC(C3)C2SC1(F)F	1
DTXSID00909827	N-(2-Bromo-4-nitrophenyl)-2,3,3,4,4,5,5,5-octafluoro-2-(trifluoromethyl)pentanimidic acid	105923-79-3	OC(=NC1=C(Br)C=C(C=C1)N(=O)=O)C(F)(C(F)(F)F)C(F)(F)C(F)(F)C(F)(F)F	1
DTXSID00912396	3-Formyl-2,2-bis(trifluoromethyl)cyclopropane-1-carbonyl chloride	99903-47-6	[H][C@@]1(C=O)[C@@]([H])(C(Cl)=O)C1(C(F)(F)F)C(F)(F)F	1
DTXSID00920532	1-Acetyl-6-(1,1,1,2,3,3,3-heptafluoro-2-propanyl)-3-{[(2,6-14C2)-3-pyridinylmethyl]amino}-3,4-dihydro-2(1H)-quinazolinone	NOCAS_920532	CC(=O)N1C(=O)N(CC2=C1C=CC(=C2)C(F)(C(F)(F)F)C(F)(F)F)NCC1=[14CH]N=[14CH]C=C1	1
DTXSID00922854	N-(1-Hydroxyethylidene)-S-(1,1,2,2-tetrafluoroethyl)cysteine	119018-04-1	[H][C@@](CSC(F)(F)C(F)F)(N=C(C)O)C(O)=O	1
DTXSID00933788	N-{N-[4-(Morpholine-4-carbonyl)benzoyl]valyl}-1-(5,5,6,6,6-pentafluoro-2-methyl-4-oxohexan-3-yl)pyrrolidine-2-carboximidic acid	149859-17-6	[H][C@](NC(=O)C1=CC=C(C=C1)C(=O)N1CCOCC1)(C(C)C)C(=O)NC(=O)[C@]1([H])CCCN1C([H])(C(C)C)C(=O)C(F)(F)C(F)(F)F	1
DTXSID00934755	25,26,26,26,27,27,27-Heptafluoro-3-hydroxycholest-8(14)-en-15-one	153463-20-8	[H][C@@]1(CC(=O)C2=C3CC[C@@]4([H])C[C@@H](O)CC[C@]4(C)[C@@]3([H])CC[C@]12C)[C@H](C)CCCC(F)(C(F)(F)F)C(F)(F)F	1
DTXSID00936951	1-Bromo-1-chloro-2,2,3,3-tetrafluoropropane	1645-78-9	FC(F)C(F)(F)C(Cl)Br	1
DTXSID00937605	Dichloro(methyl)[3-(1,1,2,2-tetrafluoroethoxy)propyl]silane	1692-54-2	C[Si](Cl)(Cl)CCCOC(F)(F)C(F)F	1
DTXSID00947103	1,1,2,3,3-Pentafluoropropane	24270-66-4	FC(F)C(F)C(F)F	1
DTXSID00949607	2-{[2-(Dimethylamino)ethyl]amino}-1,1,1,3,3,3-hexafluoropropan-2-ol	26799-34-8	CN(C)CCNC(O)(C(F)(F)F)C(F)(F)F	1
DTXSID00951063	2,2-Bis(trifluoromethyl)-1,3-thiazolidine--water (1/1)	28399-14-6	O.FC(F)(F)C1(NCCS1)C(F)(F)F	1
DTXSID00952575	1,1,1,3,3,3-Hexafluoro-2-[(2-hydroxyethyl)amino]propan-2-ol	30184-89-5	OCCNC(O)(C(F)(F)F)C(F)(F)F	1
DTXSID00953269	1-Ethoxy-2,2,3,3,3-pentafluoropropyl 4-methylbenzene-1-sulfonate	31185-48-5	CCOC(OS(=O)(=O)C1=CC=C(C)C=C1)C(F)(F)C(F)(F)F	1
DTXSID00956316	4,4,4-Trifluoro-2-methyl-1-phenyl-3-(trifluoromethyl)butane-1,3-diol	34844-08-1	CC(C(O)C1=CC=CC=C1)C(O)(C(F)(F)F)C(F)(F)F	1
DTXSID00956336	4,4,4-Trifluoro-1-(4-fluorophenyl)-2-methyl-3-(trifluoromethyl)butane-1,3-diol	34848-32-3	CC(C(O)C1=CC=C(F)C=C1)C(O)(C(F)(F)F)C(F)(F)F	1
DTXSID00956977	2,2,3,3-Tetrafluorocyclobutane-1-carbonitrile	356-81-0	FC1(F)CC(C#N)C1(F)F	1
DTXSID00959201	4-Ethyl-5-hexyl-2,2-bis(trifluoromethyl)-1,3-dioxolane	38274-67-8	CCCCCCC1OC(OC1CC)(C(F)(F)F)C(F)(F)F	1
DTXSID00959968	2,3,3,3-Tetrafluoro-2-[1,1,2,2-tetrafluoro-2-(trifluoromethoxy)ethoxy]propanoyl fluoride	39187-44-5	FC(=O)C(F)(OC(F)(F)C(F)(F)OC(F)(F)F)C(F)(F)F	1
DTXSID00962891	2,2,3,3-Tetrafluoropropanenitrile	431-32-3	FC(F)C(F)(F)C#N	1
DTXSID00966632	Butyl hydrogen (2-{4-[(3,4-dimethyl-1,2-oxazol-5-yl)sulfamoyl]anilino}-1,1,1,3,3,3-hexafluoropropan-2-yl)carbonimidate	5226-12-0	CCCCOC(O)=NC(NC1=CC=C(C=C1)S(=O)(=O)NC1=C(C)C(C)=NO1)(C(F)(F)F)C(F)(F)F	1
DTXSID00968818	1-(Difluoromethoxy)-1,1,2,2,2-pentafluoroethane	53997-64-1	FC(F)OC(F)(F)C(F)(F)F	1
DTXSID00976079	4,5-Dichloro-4,5-difluoro-2,2-bis(trifluoromethyl)-1,3-dioxolane	60644-92-0	FC(F)(F)C1(OC(F)(Cl)C(F)(Cl)O1)C(F)(F)F	1
DTXSID00979207	2,2,3,3,4,4-Hexafluoropentane-1,5-diyl bis(4-methylbenzene-1-sulfonate)	632-01-9	CC1=CC=C(C=C1)S(=O)(=O)OCC(F)(F)C(F)(F)C(F)(F)COS(=O)(=O)C1=CC=C(C)C=C1	1
DTXSID00980530	4,4-Bis(trifluoromethyl)piperidine--water (1/1)	63867-63-0	O.FC(F)(F)C1(CCNCC1)C(F)(F)F	1
DTXSID00985126	[(1,1,2,2-Tetrafluoroethyl)sulfanyl]acetic acid	665-35-0	OC(=O)CSC(F)(F)C(F)F	1
DTXSID00987261	2,2,3,3,3-Pentafluoro-N-(2,2,3,3,3-pentafluoropropanimidoyl)propanimidamide	679-25-4	FC(F)(F)C(F)(F)C(=N)NC(=N)C(F)(F)C(F)(F)F	1
DTXSID101002563	Cyano(3-phenoxyphenyl)methyl 3-(2,2-dichloroethenyl)-2,2-bis(trifluoromethyl)cyclopropane-1-carboxylate	82224-37-1	FC(F)(F)C1(C(C=C(Cl)Cl)C1C(=O)OC(C#N)C1=CC(OC2=CC=CC=C2)=CC=C1)C(F)(F)F	1
DTXSID101007894	N-(2-Chloroethyl)-N-ethyl-perfluorooctane-1-sulfonamide	87988-71-4	CCN(CCCl)S(=O)(=O)C(F)(F)C(F)(F)C(F)(F)C(F)(F)C(F)(F)C(F)(F)C(F)(F)C(F)(F)F	1
DTXSID101009907	1H,1H,2H,2H-Perfluorododecyl acetate	37858-05-2	CC(=O)OCCC(F)(F)C(F)(F)C(F)(F)C(F)(F)C(F)(F)C(F)(F)C(F)(F)C(F)(F)C(F)(F)C(F)(F)F	1
DTXSID101015594	(8-Pentafluoro(5)sulfide)-perfluorooctanoic acid	2269495-20-5	OC(=O)C(F)(F)C(F)(F)C(F)(F)C(F)(F)C(F)(F)C(F)(F)C(F)(F)S(F)(F)(F)(F)F	1
DTXSID101017869	Des-iodoflubendiamide	1016160-78-3	CC1=C(NC(=O)C2=C(C=CC=C2)C(=O)NC(C)(C)CS(C)(=O)=O)C=CC(=C1)C(F)(C(F)(F)F)C(F)(F)F	1
DTXSID101019146	1,1,2,2,3,3,4,5,5,6,6,7,7,7-tetradecafluoro-4-(trifluoromethyl)heptane-1-sulfonic acid	NOCAS_1019146	OS(=O)(=O)C(F)(F)C(F)(F)C(F)(F)C(F)(C(F)(F)F)C(F)(F)C(F)(F)C(F)(F)F	1
DTXSID101019227	2,2,3,3,4,4,5,5,6,6,7,7,8,8,9,9,10,10,11,11,12,12,13,13,14,14,15,15,16,16,17,17,18,18-tetratriacontafluorooctadecanoic acid	2274731-02-9	[H]C(F)(F)C(F)(F)C(F)(F)C(F)(F)C(F)(F)C(F)(F)C(F)(F)C(F)(F)C(F)(F)C(F)(F)C(F)(F)C(F)(F)C(F)(F)C(F)(F)C(F)(F)C(F)(F)C(F)(F)C(O)=O	1
DTXSID101020690	(4-((1,1,2,2,3,4,5,5,6,6,7,7,8,8,9,9,9-Heptadecafluoro-3-nonen-1-yl)oxy)benzyl)phosphonic acid	NOCAS_1020690	OP(O)(=O)CC1=CC=C(OC(F)(F)C(F)(F)C(F)=C(F)C(F)(F)C(F)(F)C(F)(F)C(F)(F)C(F)(F)F)C=C1	1
DTXSID101021531	Dimethyl (2Z)-2,3,4-trifluoro-4-(trifluoromethyl)-2-pentenedioate	74032-60-3	COC(=O)C(\F)=C(\F)C(F)(C(=O)OC)C(F)(F)F	1
DTXSID101022008	3-({4-[(2,3-Dihydroxypropyl)(dimethyl)azaniumyl]-1-hydroxy-2-butanyl}[(perfluoroethyl)sulfonyl]amino)-1-propanesulfonate	2089108-87-0	C[N+](C)(CCC(CO)N(CCCS([O-])(=O)=O)S(=O)(=O)C(F)(F)C(F)(F)F)CC(O)CO	1
DTXSID101022022	N-(2-Hydroxyethyl)-3-[(2-hydroxyethyl)[(perfluoroethyl)sulfonyl]amino]-N,N-dimethyl-1-propanaminium	2089108-97-2	C[N+](C)(CCO)CCCN(CCO)S(=O)(=O)C(F)(F)C(F)(F)F	1
DTXSID101022060	N-(Carboxymethyl)-3-[(carboxymethyl)(1,1,2,2,3,3,3-heptafluoropropane-1-sulfonyl)amino]-N,N-dimethylpropan-1-aminium	2089109-87-3	C[N+](C)(CCCN(CC(O)=O)S(=O)(=O)C(F)(F)C(F)(F)C(F)(F)F)CC(O)=O	1
DTXSID101022127	2-Hydroxy-N-(3-{(2-hydroxy-3-sulfopropyl)[(perfluorohexyl)sulfonyl]amino}propyl)-N,N-dimethyl-3-sulfo-1-propanaminium	2089109-72-6	C[N+](C)(CCCN(CC(O)CS(O)(=O)=O)S(=O)(=O)C(F)(F)C(F)(F)C(F)(F)C(F)(F)C(F)(F)C(F)(F)F)CC(O)CS(O)(=O)=O	1
DTXSID101022191	Glycine, N-(ethylsulfonyl)-N-(heptadecafluorooctyl)-, potassium salt	95640-78-1	[K+].CCS(=O)(=O)N(CC([O-])=O)C(F)(F)C(F)(F)C(F)(F)C(F)(F)C(F)(F)C(F)(F)C(F)(F)C(F)(F)F	1
DTXSID101022208	2-Octen-1-aminium, 3,4,4,5,5,6,6,7,7,8,8,8-dodecafluoro-N-(2-hydroxyethyl)-N-methyl-N-(3-sulfopropyl)-	84070-70-2	OCC[N+](CCS([O-])(=O)=O)(CC=C(F)C(F)(F)C(F)(F)C(F)(F)C(F)(F)C(F)(F)F)CC(O)=O	1
DTXSID101022210	N,N′-[1,6-Hexanediylbis[(2-oxo-3,5-oxazolidinediyl)methylene]]bis[N-methyl-perfluoro-1-octanesulfonamide]	116250-61-4	CN(CC1CN(CCCCCCN2CC(CN(C)S(=O)(=O)C(F)(F)C(F)(F)C(F)(F)C(F)(F)C(F)(F)C(F)(F)C(F)(F)C(F)(F)F)OC2=O)C(=O)O1)S(=O)(=O)C(F)(F)C(F)(F)C(F)(F)C(F)(F)C(F)(F)C(F)(F)C(F)(F)C(F)(F)F	1
DTXSID101022258	1,10-Diazido-3,3,4,4,5,5,6,6,7,7,8,8-dodecafluorodecane	132833-44-4	FC(F)(CCN=[N+]=[N-])C(F)(F)C(F)(F)C(F)(F)C(F)(F)C(F)(F)CCN=[N+]=[N-]	1
DTXSID101022260	N-Methyl-N-[(perfluorobutyl)sulfonyl]glycine	159381-10-9	CN(CC(O)=O)S(=O)(=O)C(F)(F)C(F)(F)C(F)(F)C(F)(F)F	1
DTXSID101022353	2-(3,4-Dimethoxyphenyl)-1-[5-(heptafluoropropyl)-5-hydroxy-3-phenyl-4,5-dihydro-1H-pyrazol-1-yl]ethanone	375354-47-5	COC1=C(OC)C=C(CC(=O)N2N=C(CC2(O)C(F)(F)C(F)(F)C(F)(F)F)C2=CC=CC=C2)C=C1	1
DTXSID101022484	4-(1,1,2,3,3,3-Hexafluoropropoxy)-N-(2-phenoxyethyl)benzamide	909351-91-3	FC(C(F)(F)F)C(F)(F)OC1=CC=C(C=C1)C(=O)NCCOC1=CC=CC=C1	1
DTXSID101022591	5-Chloro-1,1,1,2,2-pentafluoropentane	1024003-32-4	FC(F)(F)C(F)(F)CCCCl	1
DTXSID101022646	1-(1-Azepanyl)-3-azido-2,2,3,3-tetrafluoro-1-propanone	1242614-42-1	FC(F)(N=[N+]=[N-])C(F)(F)C(=O)N1CCCCCC1	1
DTXSID101022684	3-(2,2,3,3,4,4,4-Heptafluorobutoxy)propanenitrile	1365808-34-9	FC(F)(F)C(F)(F)C(F)(F)COCCC#N	1
DTXSID101022703	1-Bromo-3-(2,2,3,3,4,4,4-heptafluorobutoxy)benzene	1365808-77-0	FC(F)(F)C(F)(F)C(F)(F)COC1=CC(Br)=CC=C1	1
DTXSID101022715	1,1,1,2,2,3,3,4,4-Nonafluoro-6-iodononane	1378261-30-3	CCCC(I)CC(F)(F)C(F)(F)C(F)(F)C(F)(F)F	1
DTXSID101022727	Methyl 2-chloro-5-{1-[1-methyl-3-(pentafluoroethyl)-4-(trifluoromethyl)-1H-pyrazol-5-yl]-1H-1,2,3-triazol-4-yl}benzoate	1393097-61-4	COC(=O)C1=C(Cl)C=CC(=C1)C1=CN(N=N1)C1=C(C(=NN1C)C(F)(F)C(F)(F)F)C(F)(F)F	1
DTXSID101022739	N'-[(2Z)-5,5,6,6,7,7,7-Heptafluoro-4-oxo-2-heptanylidene]-4-methylbenzohydrazide	1087654-74-7	C\C(CC(=O)C(F)(F)C(F)(F)C(F)(F)F)=N\NC(=O)C1=CC=C(C)C=C1	1
DTXSID101022834	2-(5-Chloro-1,1,2,2,3,3,4,4,5,5-decafluoropentyl)-7-methyl-4H-1-benzopyran-4-one	155445-01-5	CC1=CC2=C(C=C1)C(=O)C=C(O2)C(F)(F)C(F)(F)C(F)(F)C(F)(F)C(F)(F)Cl	1
DTXSID101022872	2-Chloro-N-(1-cyanocyclopropyl)-5-(1'-methyl-3'-(1,1,2,2,2-pentafluoroethyl)-4'-(trifluoromethyl)(1,5'-bi-1H-pyrazol)-4-yl)benzamide	1621436-41-6	CN1N=C(C(=C1N1C=C(C=N1)C1=CC(C(=O)NC2(CC2)C#N)=C(Cl)C=C1)C(F)(F)F)C(F)(F)C(F)(F)F	1
DTXSID101022953	2,2,3,3,3-Pentafluoropropyl propyl carbonate	1980085-61-7	CCCOC(=O)OCC(F)(F)C(F)(F)F	1
DTXSID101022989	1,1,2,2-Tetrafluoro-1,2-dihydroacenaphthylene	21846-40-2	FC1(F)C2=CC=CC3=CC=CC(=C23)C1(F)F	1
DTXSID101023006	3,4,4,4-Tetrafluoro-1-iodo-3-(trifluoromethyl)-1-butene	243139-61-9	FC(F)(F)C(F)(C=CI)C(F)(F)F	1
DTXSID101023032	2-Nitro-1,3,5-tris(pentafluoroethoxy)benzene	52999-51-6	[O-][N+](=O)C1=C(OC(F)(F)C(F)(F)F)C=C(OC(F)(F)C(F)(F)F)C=C1OC(F)(F)C(F)(F)F	1
DTXSID101023056	2,2,3,3-Tetrafluoro-6-nitro-2,3-dihydro-1,4-benzodioxine	89586-09-4	[O-][N+](=O)C1=CC2=C(OC(F)(F)C(F)(F)O2)C=C1	1
DTXSID101023137	3,4,4-Trifluoro-3-(pentafluoroethyl)-1,2l6-oxathietane-2,2-dione	108858-07-7	FC(F)(F)C(F)(F)C1(F)C(F)(F)OS1(=O)=O	1
DTXSID101023149	1,1,1,2,2-Pentafluoro-2-[(2-iodoethyl)sulfanyl]ethane	1206523-87-6	FC(F)(F)C(F)(F)SCCI	1
DTXSID101023151	3-(1,1,2,2,2-Pentafluoroethylsulfanyl)propan-1-amine	1208080-59-4	NCCCSC(F)(F)C(F)(F)F	1
DTXSID101023175	3-Fluoro-4-(pentafluoroethyl)benzoic acid	1355157-51-5	OC(=O)C1=CC=C(C(F)=C1)C(F)(F)C(F)(F)F	1
DTXSID101023187	3-(2,2,3,3,4,4-Hexafluorobutoxy)aniline	1427021-89-3	NC1=CC(OCC(F)(F)C(F)(F)C(F)F)=CC=C1	1
DTXSID101023199	1-[6-(Pentafluoroethyl)pyridin-2-yl]ethan-1-one	1580464-65-8	CC(=O)C1=NC(=CC=C1)C(F)(F)C(F)(F)F	1
DTXSID101023206	3-Chloro-4-(pentafluoroethyl)pyridine	1816286-90-4	FC(F)(F)C(F)(F)C1=C(Cl)C=NC=C1	1
DTXSID101023218	1,3-Dibromo-2-chloro-1,1,2,3,3-pentafluoropropane	422-79-7	FC(F)(Br)C(F)(Cl)C(F)(F)Br	1
DTXSID101023220	Trimethylsilyl 1,1,2,2,3,3,4,4,4-nonafluoro-1-butanesulfinate	51735-77-4	C[Si](C)(C)OS(=O)C(F)(F)C(F)(F)C(F)(F)C(F)(F)F	1
DTXSID101023232	3-(1,1,2,2-Tetrafluoroethyl)aniline	585-41-1	NC1=CC(=CC=C1)C(F)(F)C(F)F	1
DTXSID101023244	2,2,3,3-Tetrafluoro-N,N-dimethylpropan-1-amine	813-87-6	CN(C)CC(F)(F)C(F)F	1
DTXSID101023399	Cyclohexane, 1,1,2,2,3,3,4,4,5,5,6-undecafluoro-6-(1,1,2,2,3,3,4,4,5,5,6,6,7,7,8,8,9,9,10,10,10-heneicosafluorodecyl)-	87667-00-3	FC(F)(F)C(F)(F)C(F)(F)C(F)(F)C(F)(F)C(F)(F)C(F)(F)C(F)(F)C(F)(F)C(F)(F)C1(F)C(F)(F)C(F)(F)C(F)(F)C(F)(F)C1(F)F	1
DTXSID101023644	1-Chloro-2-(difluoromethoxy)-1,1,2,3,3,3-hexafluoropropane	60632-00-0	FC(F)OC(F)(C(F)(F)F)C(F)(F)Cl	1
DTXSID101023737	6,11,14,17-Tetraoxa-7-silaeicos-1-yn-3-ol, 7,7-dibutyl-13,15,15,16,18,18,19,19,20,20,20-undecafluoro-3-methyl-13,16-bis(trifluoromethyl)-	717825-76-8	CCCC[Si](CCCC)(CCCOCC(F)(OC(F)(F)C(F)(OC(F)(F)C(F)(F)C(F)(F)F)C(F)(F)F)C(F)(F)F)OCCC(C)(O)C#C	1
DTXSID101023749	Perfluoro-2,3-bis[2-(fluorosulfonyl)ethoxy]propanoyl fluoride	921204-31-1	FC(=O)C(F)(OC(F)(F)C(F)(F)S(F)(=O)=O)C(F)(F)OC(F)(F)C(F)(F)S(F)(=O)=O	1
DTXSID101026498	Ethylammonium perfluoro-6-(trifluoromethyl)heptanoate	54785-06-7	CC[NH3+].[O-]C(=O)C(F)(F)C(F)(F)C(F)(F)C(F)(F)C(F)(C(F)(F)F)C(F)(F)F	1
DTXSID101026505	2-(((4-(4-(((2-(Methyl((nonafluorobutyl)sulfonyl)amino)ethoxy)carbonyl)amino)benzyl)phenyl)carbamoyl)oxy)ethyl prop-2-enoate	856220-62-7	CN(CCOC(=O)NC1=CC=C(CC2=CC=C(NC(=O)OCCOC(=O)C=C)C=C2)C=C1)S(=O)(=O)C(F)(F)C(F)(F)C(F)(F)C(F)(F)F	1
DTXSID101026529	(Perfluorohexadecyl)hexadecene	1244062-14-3	CCCCCCCCCCCCCC\C=C\C(F)(F)C(F)(F)C(F)(F)C(F)(F)C(F)(F)C(F)(F)C(F)(F)C(F)(F)C(F)(F)C(F)(F)C(F)(F)C(F)(F)C(F)(F)C(F)(F)C(F)(F)C(F)(F)F	1
DTXSID101026579	4,4,5,5,6,6,7,7,8,8,8‐Undecafluorooct‐2‐enoic acid	1869-04-1	OC(=O)C=CC(F)(F)C(F)(F)C(F)(F)C(F)(F)C(F)(F)F	1
DTXSID101026648	1,1,2,2,3,3,4,4,5,5,6,6,6-Tridecafluoro-N-(2-hydroxyethyl)hexane-1-sulfonamide	106443-63-4	OCCNS(=O)(=O)C(F)(F)C(F)(F)C(F)(F)C(F)(F)C(F)(F)C(F)(F)F	1
DTXSID101026674	1,1,2-Trifluoro-2-(pentafluoroethoxy)ethanesulfonate	880084-69-5	[O-]S(=O)(=O)C(F)(F)C(F)OC(F)(F)C(F)(F)F	1
DTXSID101026686	1,1,1,2,2,4,5,5,6,6,7,7,7-Tridecafluorohept-3-ene	NOCAS_1026686	FC(=CC(F)(F)C(F)(F)F)C(F)(F)C(F)(F)C(F)(F)F	1
DTXSID101026698	1,1,1,3,4,4,5,5,6,6,7,7,7-Tridecafluorohept-2-ene	NOCAS_1026698	FC(=CC(F)(F)F)C(F)(F)C(F)(F)C(F)(F)C(F)(F)F	1
DTXSID101026705	Tributoxy(3,3,4,4,5,5,6,6,7,7,8,8,8-tridecafluorooctyl)silane	NOCAS_1026705	CCCCO[Si](CCC(F)(F)C(F)(F)C(F)(F)C(F)(F)C(F)(F)C(F)(F)F)(OCCCC)OCCCC	1
DTXSID101026717	1,1,3,3,4,4,5,6,6,6-Decafluoro-5-(trifluoromethyl)hex-1-ene	NOCAS_1026717	FC(F)=CC(F)(F)C(F)(F)C(F)(C(F)(F)F)C(F)(F)F	1
DTXSID101026729	(2R)-1,1,1-Trifluoro-3-[N-[[3-(1,1,2,2,3,3,3-heptafluoropropyl)phenyl]methyl]-3-[3-(trifluoromethoxy)phenoxy]anilino]propan-2-ol	NOCAS_1026729	O[C@H](CN(CC1=CC(=CC=C1)C(F)(F)C(F)(F)C(F)(F)F)C1=CC(OC2=CC(OC(F)(F)F)=CC=C2)=CC=C1)C(F)(F)F	1
DTXSID101026731	[3,3,4,4,5,6,6,6-Octafluoro-2-hydroxy-2-methyl-5-(trifluoromethyl)hexyl] 2-methylprop-2-enoate	NOCAS_1026731	CC(=C)C(=O)OCC(C)(O)C(F)(F)C(F)(F)C(F)(C(F)(F)F)C(F)(F)F	1
DTXSID101026743	1,1,2,2,3,3,4,4,5,5,6,6,7,7-Tetradecafluoro-N,N'-diphenylheptane-1,7-diamine	NOCAS_1026743	FC(F)(NC1=CC=CC=C1)C(F)(F)C(F)(F)C(F)(F)C(F)(F)C(F)(F)C(F)(F)NC1=CC=CC=C1	1
DTXSID101026755	5,6-Dichloro-1-iodoperfluorohexane	NOCAS_1026755	FC(F)(Cl)C(F)(Cl)C(F)(F)C(F)(F)C(F)(F)C(F)(F)I	1
DTXSID101026767	1,1,2,2,2-Pentafluoroethylsulfonyl 2,2,2-trifluoroacetate	NOCAS_1026767	FC(F)(F)C(=O)OS(=O)(=O)C(F)(F)C(F)(F)F	1
DTXSID101026779	1,1,1,4,4,5,5,5-Octafluoropentane	142347-19-1	FC(F)(F)CCC(F)(F)C(F)(F)F	1
DTXSID101026781	3-(4-Butan-2-ylphenoxy)sulfonyl-1,1,2,2,3,3-hexafluoropropane-1-sulfonate	NOCAS_1026781	CCC(C)C1=CC=C(OS(=O)(=O)C(F)(F)C(F)(F)C(F)(F)S([O-])(=O)=O)C=C1	1
DTXSID101026793	1,1,2,2,3,3,4,4,5,5,6,6,12,12,12-Pentadecafluorododecane-1-sulfonate	NOCAS_1026793	[O-]S(=O)(=O)C(F)(F)C(F)(F)C(F)(F)C(F)(F)C(F)(F)C(F)(F)CCCCCC(F)(F)F	1
DTXSID101026812	3-Amino-N-[2-bromo-4-(1,1,1,2,3,3,3-heptafluoropropan-2-yl)-6-(trifluoromethyl)phenyl]-4-cyanobenzamide	NOCAS_1026812	NC1=C(C=CC(=C1)C(=O)NC1=C(C=C(C=C1Br)C(F)(C(F)(F)F)C(F)(F)F)C(F)(F)F)C#N	1
DTXSID101026824	2,2,3,3,4,4,5,5,6,6,7,7,8,8,9,9-Hexadecafluorodecyl prop-2-enoate	NOCAS_1026824	CC(F)(F)C(F)(F)C(F)(F)C(F)(F)C(F)(F)C(F)(F)C(F)(F)C(F)(F)COC(=O)C=C	1
DTXSID101026836	1,1,1,2,2,3,3,4,5,5,5-Undecafluoropentane	NOCAS_1026836	FC(C(F)(F)F)C(F)(F)C(F)(F)C(F)(F)F	1
DTXSID101026848	(Perfluoropropoxy)(prop‐1‐enyl)silane	NOCAS_1026848	CC=C[SiH2]OC(F)(F)C(F)(F)C(F)(F)F	1
DTXSID101026850	1,1,1,2,3,3-Hexafluoro-4-methyl-4-penten-2-ol	NOCAS_1026850	CC(=C)C(F)(F)C(O)(F)C(F)(F)F	1
DTXSID101026862	1-(1,1,2,2,3,3,3-Heptafluoropropyl)cyclohexa-3,5-diene-1,3-diamine	NOCAS_1026862	NC1=CC=CC(N)(C1)C(F)(F)C(F)(F)C(F)(F)F	1
DTXSID101026874	6-Chloro-1-(3,3,4,4,4-pentafluorobutyl)-1H-indazole-3-carboximidamide	1350855-88-7	NC(=N)C1=NN(CCC(F)(F)C(F)(F)F)C2=C1C=CC(Cl)=C2	1
DTXSID101026886	4-[Ethyl(1,1,2,2,3,3,4,4,5,5,6,6,7,7,8,8,8-heptadecafluorooctylsulfonyl)amino]-2-methylidenebutanoate	NOCAS_1026886	CCN(CCC(=C)C([O-])=O)S(=O)(=O)C(F)(F)C(F)(F)C(F)(F)C(F)(F)C(F)(F)C(F)(F)C(F)(F)C(F)(F)F	1
DTXSID101026898	2,2,3,3,4,4,5,5,6,6,7,7,8,8,9,9,10-Heptadecafluorononadecanoic acid	NOCAS_1026898	CCCCCCCCCC(F)C(F)(F)C(F)(F)C(F)(F)C(F)(F)C(F)(F)C(F)(F)C(F)(F)C(F)(F)C(O)=O	1
DTXSID101026905	5-Bromo-1-(5-bromo-1,2,3,3,4,4,5,5-octafluoropent-1-enoxy)-1,2,3,3,4,4,5,5-octafluoropent-1-ene	NOCAS_1026905	FC(OC(F)=C(F)C(F)(F)C(F)(F)C(F)(F)Br)=C(F)C(F)(F)C(F)(F)C(F)(F)Br	1
DTXSID101026917	2,6-Dibromo-4-(1,1,2,2,3,3,4,4,4-nonafluorobutylsulfinyl)aniline	NOCAS_1026917	NC1=C(Br)C=C(C=C1Br)S(=O)C(F)(F)C(F)(F)C(F)(F)C(F)(F)F	1
DTXSID101026929	2-[4-[2,2-Difluoro-2-[1,1,2,2-tetrafluoro-2-(1,1,2,2,3,3,4,4,4-nonafluorobutoxy)ethoxy]ethoxy]phenyl]-5-octoxypyrimidine	NOCAS_1026929	CCCCCCCCOC1=CN=C(N=C1)C1=CC=C(OCC(F)(F)OC(F)(F)C(F)(F)OC(F)(F)C(F)(F)C(F)(F)C(F)(F)F)C=C1	1
DTXSID101026931	1,2,3,3,4,4,5,5,6,6,7,7,8,8,9,9,9-Heptadecafluoronon-1-enoxybenzene	NOCAS_1026931	FC(OC1=CC=CC=C1)=C(F)C(F)(F)C(F)(F)C(F)(F)C(F)(F)C(F)(F)C(F)(F)C(F)(F)F	1
DTXSID101026967	2-Chloro-5-[4-[4-(1,1,1,2,3,3,3-heptafluoropropan-2-yl)-2,6-dimethylphenyl]pyrazol-1-yl]benzoic acid	NOCAS_1026967	CC1=CC(=CC(C)=C1C1=CN(N=C1)C1=CC(C(O)=O)=C(Cl)C=C1)C(F)(C(F)(F)F)C(F)(F)F	1
DTXSID101026979	1-(1,1,2,2,3,3,4,4,5,5,6,6,7,7,8,8,8-Heptadecafluorooctylsulfonyloxy)ethyl 1,1,2,2,3,3,4,4,5,5,6,6,7,7,8,8,8-heptadecafluorooctane-1-sulfonate	NOCAS_1026979	CC(OS(=O)(=O)C(F)(F)C(F)(F)C(F)(F)C(F)(F)C(F)(F)C(F)(F)C(F)(F)C(F)(F)F)OS(=O)(=O)C(F)(F)C(F)(F)C(F)(F)C(F)(F)C(F)(F)C(F)(F)C(F)(F)C(F)(F)F	1
DTXSID101026981	Ethyl 2-(4,4,5,5,5-pentafluoropentyl)-9-decenoate	NOCAS_1026981	CCOC(=O)C(CCCCCCC=C)CCCC(F)(F)C(F)(F)F	1
DTXSID101026993	5-[4-[4-(4,4,5,5,5-Pentafluoropentylsulfanyl)butoxy]phenyl]-6-phenyl-8,9-dihydro-7H-benzo[7]annulen-2-ol	NOCAS_1026993	OC1=CC2=C(C=C1)C(C1=CC=C(OCCCCSCCCC(F)(F)C(F)(F)F)C=C1)=C(CCC2)C1=CC=CC=C1	1
DTXSID101027008	N-Methyl-3-(4,4,5,5,5-pentafluoropentylsulfinyl)propan-1-amine	NOCAS_1027008	CNCCCS(=O)CCCC(F)(F)C(F)(F)F	1
DTXSID101027046	1,1,2,2,3,3,4,4,4-Nonafluorobutylsulfonylbenzene	NOCAS_1027046	FC(F)(F)C(F)(F)C(F)(F)C(F)(F)S(=O)(=O)C1=CC=CC=C1	1
DTXSID101027072	1-Fluoro-4-[1,1,2,2,3,3,4,4-octafluoro-4-(4-fluorophenyl)sulfanylbutyl]sulfanylbenzene	NOCAS_1027072	FC1=CC=C(SC(F)(F)C(F)(F)C(F)(F)C(F)(F)SC2=CC=C(F)C=C2)C=C1	1
DTXSID101027084	1-(Pentafluoroethyl)-1-(trifluoromethyl)cyclohexane	1196870-46-8	FC(F)(F)C(F)(F)C1(CCCCC1)C(F)(F)F	1
DTXSID101027260	Oxybis((difluoromethoxy)difluoromethane)	249932-25-0	FC(F)OC(F)(F)OC(F)(F)OC(F)F	1
DTXSID101027589	Perfluoro-4-oxodecalin	NOCAS_1027589	FC1(F)C(=O)C2(F)C(F)(F)C(F)(F)C(F)(F)C(F)(F)C2(F)C(F)(F)C1(F)F	1
DTXSID101027646	(Perfluorohexyl)ethyl 2-(hydroxymethyl)-2-propenoate	152238-55-6	[H]C([H])(OC(=O)C(=C)CO)C([H])([H])C(F)(F)C(F)(F)C(F)(F)C(F)(F)C(F)(F)C(F)(F)F	1
DTXSID101027658	2-(Perfluorooctane-1-sulfinyl)ethyl prop-2-enoate	NOCAS_1027658	FC(F)(F)C(F)(F)C(F)(F)C(F)(F)C(F)(F)C(F)(F)C(F)(F)C(F)(F)S(=O)CCOC(=O)C=C	1
DTXSID101027660	11-[(Perfluorododecanesulfonyl)amino]undecyl 2-methylprop-2-enoate	NOCAS_1027660	CC(=C)C(=O)OCCCCCCCCCCCNS(=O)(=O)C(F)(F)C(F)(F)C(F)(F)C(F)(F)C(F)(F)C(F)(F)C(F)(F)C(F)(F)C(F)(F)C(F)(F)C(F)(F)C(F)(F)F	1
DTXSID101027672	2-(Methyl{perfluoro-2-[2,6-bis(ethyl)morpholin-4-yl]ethanesulfonyl}amino)ethyl prop-2-enoate	NOCAS_1027672	CN(CCOC(=O)C=C)S(=O)(=O)C(F)(F)C(F)(F)N1C(F)(F)C(F)(OC(F)(C(F)(F)C(F)(F)F)C1(F)F)C(F)(F)C(F)(F)F	1
DTXSID101027684	2-[Bis(perfluoropentanoyl)amino]ethyl 2-methylprop-2-enoate	NOCAS_1027684	CC(=C)C(=O)OCCN(C(=O)C(F)(F)C(F)(F)C(F)(F)C(F)(F)F)C(=O)C(F)(F)C(F)(F)C(F)(F)C(F)(F)F	1
DTXSID101028082	Perfluoro[1,2,3,4,5,6,7-13C7]undecanoic acid	NOCAS_1028082	O[13C](=O)[13C](F)(F)[13C](F)(F)[13C](F)(F)[13C](F)(F)[13C](F)(F)[13C](F)(F)C(F)(F)C(F)(F)C(F)(F)C(F)(F)F	1
DTXSID101031499	1-​Propene, 1,​1,​2,​3,​3-​pentafluoro-​3-​(1,​1,​2,​2,​3,​3,​3-​heptafluoropropoxy)​-	91891-42-8	FC(F)=C(F)C(F)(F)OC(F)(F)C(F)(F)C(F)(F)F	1
DTXSID101032235	9-(Perfluoromethoxy)perfluorononane sulfonic acid	NOCAS_1032235	OS(=O)(=O)C(F)(F)C(F)(F)C(F)(F)C(F)(F)C(F)(F)C(F)(F)C(F)(F)C(F)(F)C(F)(F)OC(F)(F)F	1
DTXSID101032247	4-(Pentafluorosulfanyl)perfluorobutyl sulfonic acid	NOCAS_1032247	OS(=O)(=O)C(F)(F)C(F)(F)C(F)(F)C(F)(F)S(F)(F)(F)(F)F	1
DTXSID101032285	(E)-Perfluorohept-5-ene-1-sulfonic acid	NOCAS_1032285	OS(=O)(=O)C(F)(F)C(F)(F)C(F)(F)C(F)(F)C(\F)=C(/F)C(F)(F)F	1
DTXSID101032297	1-Chloroperfluoropentanesulfonic acid	NOCAS_1032297	OS(=O)(=O)C(F)(Cl)C(F)(F)C(F)(F)C(F)(F)C(F)(F)F	1
DTXSID101032316	(E)-5H-Perfluorooct-6-ene-1-sulfonic acid	NOCAS_1032316	OS(=O)(=O)C(F)(F)C(F)(F)C(F)(F)C(F)(F)C(F)C(\F)=C(/F)C(F)(F)F	1
DTXSID101032328	1H-Perfluoroethanesulfonic acid	20705-83-3	OS(=O)(=O)C(F)C(F)(F)F	1
DTXSID101032330	5H-Perfluorohexanesulfonic acid	2089109-56-6	[H]C(F)(C(F)(F)F)C(F)(F)C(F)(F)C(F)(F)C(F)(F)S(O)(=O)=O	1
DTXSID101032380	Perfluoro-11-oxododecane-1-sulfonic acid	NOCAS_1032380	OS(=O)(=O)C(F)(F)C(F)(F)C(F)(F)C(F)(F)C(F)(F)C(F)(F)C(F)(F)C(F)(F)C(F)(F)C(F)(F)C(=O)C(F)(F)F	1
DTXSID101032461	{Ethyl[(perfluorononyl)sulfonyl]amino}acetic acid	1003194-09-9	CCN(CC(O)=O)S(=O)(=O)C(F)(F)C(F)(F)C(F)(F)C(F)(F)C(F)(F)C(F)(F)C(F)(F)C(F)(F)C(F)(F)F	1
DTXSID101032485	N,N-Bis(2,3-dihydroxypropyl)-perfluoroheptanamide	118675-72-2	OCC(O)CN(CC(O)CO)C(=O)C(F)(F)C(F)(F)C(F)(F)C(F)(F)C(F)(F)C(F)(F)F	1
DTXSID101032497	3-({4-[(2,3-Dihydroxypropyl)(dimethyl)azaniumyl]-1-hydroxy-2-butanyl}[(perfluorobutyl)sulfonyl]amino)-1-propanesulfonate	2089108-89-2	C[N+](C)(CCC(CO)N(CCCS([O-])(=O)=O)S(=O)(=O)C(F)(F)C(F)(F)C(F)(F)C(F)(F)F)CC(O)CO	1
DTXSID101032504	N-[3-(Dimethyloxidoamino)propyl]perfluoro-3,7-dioxaoctanamide	1204950-97-9	C[N+](C)([O-])CCCNC(=O)C(F)(F)OC(F)(F)C(F)(F)C(F)(F)OC(F)(F)F	1
DTXSID101032530	N-(2-Hydroxyethyl)-3-[(2-hydroxyethyl)[(perfluorobutyl)sulfonyl]amino]-N,N-dimethyl-1-propanaminium	2089108-99-4	C[N+](C)(CCO)CCCN(CCO)S(=O)(=O)C(F)(F)C(F)(F)C(F)(F)C(F)(F)F	1
DTXSID101032542	N-(2-Hydroxyethyl)-N,N-dimethyl-3-[[(perfluoroethyl)sulfonyl]amino]-1-propanaminium	2089109-07-7	C[N+](C)(CCO)CCCNS(=O)(=O)C(F)(F)C(F)(F)F	1
DTXSID101032578	2-(Perfluorohexyl)ethyltris(1-methylethoxy)silane	1240203-07-9	CC(C)O[Si](CCC(F)(F)C(F)(F)C(F)(F)C(F)(F)C(F)(F)C(F)(F)F)(OC(C)C)OC(C)C	1
DTXSID101032580	beta-Alanine, N-(4-piperidinylmethyl)-, 2,2,3,3,4,4,5,5-octafluoro-6-[(1-oxo-2-propen-1-yl)oxy]hexyl ester	1233879-49-6	FC(F)(COC(=O)CCNCC1CCNCC1)C(F)(F)C(F)(F)C(F)(F)COC(=O)C=C	1
DTXSID101032592	Perfluoro-4-hexene-1-sulfonic acid	2089109-41-9	OS(=O)(=O)C(F)(F)C(F)(F)C(F)(F)C(F)=C(F)C(F)(F)F	1
DTXSID101032609	2-(Acetyloxy)-N-(carboxymethyl)-N,N-dimethyl-3-(perfluorohexadecyl)-1-propanaminium	1296786-53-2	CC(=O)OC(CC(F)(F)C(F)(F)C(F)(F)C(F)(F)C(F)(F)C(F)(F)C(F)(F)C(F)(F)C(F)(F)C(F)(F)C(F)(F)C(F)(F)C(F)(F)C(F)(F)C(F)(F)C(F)(F)F)C[N+](C)(C)CC(O)=O	1
DTXSID101032611	N,N′-[Phosphinicobis(oxy-2,1-ethanediyl)]bis[N-methylperfluoro-1-octanesulfonamide]	132445-38-6	CN(CCOP(O)(=O)OCCN(C)S(=O)(=O)C(F)(F)C(F)(F)C(F)(F)C(F)(F)C(F)(F)C(F)(F)C(F)(F)C(F)(F)F)S(=O)(=O)C(F)(F)C(F)(F)C(F)(F)C(F)(F)C(F)(F)C(F)(F)C(F)(F)C(F)(F)F	1
DTXSID101032623	1,1,1,2,2,3,3,4,4-Nonafluoro-6-methylheptane	212957-45-4	CC(C)CC(F)(F)C(F)(F)C(F)(F)C(F)(F)F	1
DTXSID101032635	Methyl perfluoroheptyl ether	222719-64-4	COC(F)(F)C(F)(F)C(F)(F)C(F)(F)C(F)(F)C(F)(F)C(F)(F)F	1
DTXSID101032659	Lithium perfluoro({[1-(1,2-dichloro-1,2,2-trifluoroethoxy)propan-2-yl]oxy}methoxy)methanesulfonate	1383434-27-2	[Li+].[O-]S(=O)(=O)C(F)(F)OC(F)(F)OC(F)(C(F)(F)F)C(F)(F)OC(F)(Cl)C(F)(F)Cl	1
DTXSID101032661	Ammonium perfluoro-2-[(6-chlorohexyl)oxy]ethane-1-sulfonate	1383434-28-3	[NH4+].[O-]S(=O)(=O)C(F)(F)C(F)(F)OC(F)(F)C(F)(F)C(F)(F)C(F)(F)C(F)(F)C(F)(F)Cl	1
DTXSID101032673	Lithium(1+) perfluoro‐5‐{[(perfluoropentanesulfonyl)azanidyl]sulfonyl}pentane	288570-49-0	[Li+].FC(F)(F)C(F)(F)C(F)(F)C(F)(F)C(F)(F)S(=O)(=O)[N-]S(=O)(=O)C(F)(F)C(F)(F)C(F)(F)C(F)(F)C(F)(F)F	1
DTXSID101032728	3-[Hexyl[(perfluorododecyl)sulfonyl]amino]-2-hydroxypropyl hexatriacontanoate	141187-89-5	CCCCCCCCCCCCCCCCCCCCCCCCCCCCCCCCCCCC(=O)OCC(O)CN(CCCCCC)S(=O)(=O)C(F)(F)C(F)(F)C(F)(F)C(F)(F)C(F)(F)C(F)(F)C(F)(F)C(F)(F)C(F)(F)C(F)(F)C(F)(F)C(F)(F)F	1
DTXSID101032730	2-Hydroxy-3-[(perfluorohexyl)ethoxy]propyl triacontanoate	141267-36-9	CCCCCCCCCCCCCCCCCCCCCCCCCCCCCC(=O)OCC(O)COCCC(F)(F)C(F)(F)C(F)(F)C(F)(F)C(F)(F)C(F)(F)F	1
DTXSID101032742	2,4,6,8-Tetramethyl-2-[3-(2-oxiranylmethoxy)propyl]-4,6-bis[3-[(perfluoro(2-[2-(propoxy)propoxy]-2-ethyl))methoxyl]propyl]cyclotetrasiloxane	1428232-89-6	C[SiH]1O[Si](C)(CCCOCC2CO2)O[Si](C)(CCCOCC(F)(F)C(F)(F)OC(F)(F)C(F)(OC(F)(F)C(F)(F)C(F)(F)F)C(F)(F)F)O[Si](C)(CCCOCC(F)(F)C(F)(F)OC(F)(F)C(F)(OC(F)(F)C(F)(F)C(F)(F)F)C(F)(F)F)O1	1
DTXSID101032766	Sodium perfluoro-1-ethanesulfinate	146542-36-1	[Na+].[O-]S(=O)C(F)(F)C(F)(F)F	1
DTXSID101032780	12:2 Fluorotelomer sulfonic acid	149246-64-0	OS(=O)(=O)CCC(F)(F)C(F)(F)C(F)(F)C(F)(F)C(F)(F)C(F)(F)C(F)(F)C(F)(F)C(F)(F)C(F)(F)C(F)(F)C(F)(F)F	1
DTXSID101032792	2-Chloroperfluoroheptane	319490-62-5	FC(F)(F)C(F)(F)C(F)(F)C(F)(F)C(F)(F)C(F)(Cl)C(F)(F)F	1
DTXSID101032809	1-Butylpyridinium perfluoro-1-butanesulfonate	334529-64-5	CCCC[N+]1=CC=CC=C1.[O-]S(=O)(=O)C(F)(F)C(F)(F)C(F)(F)C(F)(F)F	1
DTXSID101032811	Perfluoro-1,3-diethylcyclohexane	335-23-9	FC(F)(F)C(F)(F)C1(F)C(F)(F)C(F)(F)C(F)(F)C(F)(C(F)(F)C(F)(F)F)C1(F)F	1
DTXSID101032823	13:3 Fluorotelomer betaine	1513864-13-5	C[N+](C)(CCCC(F)(F)C(F)(F)C(F)(F)C(F)(F)C(F)(F)C(F)(F)C(F)(F)C(F)(F)C(F)(F)C(F)(F)C(F)(F)C(F)(F)C(F)(F)F)CC([O-])=O	1
DTXSID101032835	2-Hydroxy-N,N,N-trimethyl-3-[(perfluorobutyl)ethylthio]-1-propanaminium	1513864-16-8	C[N+](C)(C)CC(O)CSCCC(F)(F)C(F)(F)C(F)(F)C(F)(F)F	1
DTXSID101032859	1-Chloroperfluoropentane	375-71-3	FC(F)(F)C(F)(F)C(F)(F)C(F)(F)C(F)(F)Cl	1
DTXSID101032861	3-[[(Perfluorooctyl)sulfonyl]methylamino]-N,N,N-trimethyl-1-propanaminium sulfate (1:1)	153968-05-9	OS([O-])(=O)=O.C[N+](C)(C)CCCNCS(=O)(=O)C(F)(F)C(F)(F)C(F)(F)C(F)(F)C(F)(F)C(F)(F)C(F)(F)C(F)(F)F	1
DTXSID101032885	3,3,4,4,5,5,6,6,7,7,8,8,8-Tridecafluoro-N,N-dimethyloctan-1-amine N-oxide	NOCAS_1032885	CN(C)(=O)CCC(F)(F)C(F)(F)C(F)(F)C(F)(F)C(F)(F)C(F)(F)F	1
DTXSID101032916	Silver perfluoroheptanoate	424-05-5	[Ag+].[O-]C(=O)C(F)(F)C(F)(F)C(F)(F)C(F)(F)C(F)(F)C(F)(F)F	1
DTXSID101032928	Bis(perfluoroheptyl) phosphinic acid	158986-67-5	OP(=O)(C(F)(F)C(F)(F)C(F)(F)C(F)(F)C(F)(F)C(F)(F)C(F)(F)F)C(F)(F)C(F)(F)C(F)(F)C(F)(F)C(F)(F)C(F)(F)C(F)(F)F	1
DTXSID101032978	Bis[perfluoro-2-(1-methylethoxy)ethyl] phosphinic acid erbium (3+) salt	500776-83-0	[Er+3].[O-]P(=O)(C(F)(F)C(F)(F)OC(F)(C(F)(F)F)C(F)(F)F)C(F)(F)C(F)(F)OC(F)(C(F)(F)F)C(F)(F)F.[O-]P(=O)(C(F)(F)C(F)(F)OC(F)(C(F)(F)F)C(F)(F)F)C(F)(F)C(F)(F)OC(F)(C(F)(F)F)C(F)(F)F.[O-]P(=O)(C(F)(F)C(F)(F)OC(F)(C(F)(F)F)C(F)(F)F)C(F)(F)C(F)(F)OC(F)(C(F)(F)F)C(F)(F)F	1
DTXSID101032980	Bis(perfluorobutyl) phosphinic acid erbium(3+) salt	500776-85-2	[Er+3].[O-]P(=O)(C(F)(F)C(F)(F)C(F)(F)C(F)(F)F)C(F)(F)C(F)(F)C(F)(F)C(F)(F)F.[O-]P(=O)(C(F)(F)C(F)(F)C(F)(F)C(F)(F)F)C(F)(F)C(F)(F)C(F)(F)C(F)(F)F.[O-]P(=O)(C(F)(F)C(F)(F)C(F)(F)C(F)(F)F)C(F)(F)C(F)(F)C(F)(F)C(F)(F)F	1
DTXSID101032992	3-(Dimethyl{3-[(1,1,2,2,3,3,4,4,5,5,6,6,7,7,7-pentadecafluoroheptane-1-sulfonyl)amino]propyl}azaniumyl)propane-1-sulfonate	NOCAS_1032992	C[N+](C)(CCCNS(=O)(=O)C(F)(F)C(F)(F)C(F)(F)C(F)(F)C(F)(F)C(F)(F)C(F)(F)F)CCCS([O-])(=O)=O	1
DTXSID101033019	15:2 Fluorotelomer alcohol	176676-69-0	OCCC(F)(F)C(F)(F)C(F)(F)C(F)(F)C(F)(F)C(F)(F)C(F)(F)C(F)(F)C(F)(F)C(F)(F)C(F)(F)C(F)(F)C(F)(F)C(F)(F)C(F)(F)F	1
DTXSID101033021	17:2 Fluorotelomer alcohol	176676-71-4	OCCC(F)(F)C(F)(F)C(F)(F)C(F)(F)C(F)(F)C(F)(F)C(F)(F)C(F)(F)C(F)(F)C(F)(F)C(F)(F)C(F)(F)C(F)(F)C(F)(F)C(F)(F)C(F)(F)C(F)(F)F	1
DTXSID101033033	Triethylammonium perfluorooctane sulfonate	54439-46-2	CC[NH+](CC)CC.[O-]S(=O)(=O)C(F)(F)C(F)(F)C(F)(F)C(F)(F)C(F)(F)C(F)(F)C(F)(F)C(F)(F)F	1
DTXSID101033045	2‐(5,5,7,7,8,8,10,10,11,11,13,13,14,14,15,15,16,16,16‐Nonadecafluoro‐2‐oxo‐3,6,9,12‐tetraoxa‐1‐azahexadecan‐1‐yl)ethyl 2‐methylprop‐2‐enoate	549549-24-8	CC(=C)C(=O)OCCNC(=O)OCC(F)(F)OC(F)(F)C(F)(F)OC(F)(F)C(F)(F)OC(F)(F)C(F)(F)C(F)(F)C(F)(F)F	1
DTXSID101033069	2-Hydroxy-N,N-dimethyl-N-{3-perfluoro-1-sulfonylnonadecyl)amino]propyl}-3-sulfo-1-propanaminium	NOCAS_1033069	C[N+](C)(CCCNS(=O)(=O)C(F)(F)C(F)(F)C(F)(F)C(F)(F)C(F)(F)C(F)(F)C(F)(F)C(F)(F)C(F)(F)F)CC(O)CS(O)(=O)=O	1
DTXSID101033071	2‐[2-(Perfluorobutyl)ethylsulfanyl]acetic acid	123708-08-7	OC(=O)CSCCC(F)(F)C(F)(F)C(F)(F)C(F)(F)F	1
DTXSID101033083	4-[Ethyl[(perfluorooctyl)sulfonyl]amino]butanesulfonic acid potassium salt (1:1)	60511-72-0	[K+].CCN(CCCCS([O-])(=O)=O)S(=O)(=O)C(F)(F)C(F)(F)C(F)(F)C(F)(F)C(F)(F)C(F)(F)C(F)(F)C(F)(F)F	1
DTXSID101033095	Chlorodipropyl(3,3,4,4,4-pentafluorobutyl)silane	608296-02-2	CCC[Si](Cl)(CCC)CCC(F)(F)C(F)(F)F	1
DTXSID101033102	Chlorodipropyl(3,3,4,4,5,5,6,6,7,7,8,8,8-tridecafluorooctyl)silane	608296-24-8	CCC[Si](Cl)(CCC)CCC(F)(F)C(F)(F)C(F)(F)C(F)(F)C(F)(F)C(F)(F)F	1
DTXSID101033114	Chloro(3,3,4,4,5,5,6,6,7,7,7-undecafluoroheptyl)bis(3,3,3-trifluoropropyl)silane	608296-92-0	FC(F)(F)CC[Si](Cl)(CCC(F)(F)F)CCC(F)(F)C(F)(F)C(F)(F)C(F)(F)C(F)(F)F	1
DTXSID101033138	N-[3-(Dimethylamino)propyl]perfluoro-4-(methyl)cyclohexanecarboxamide N-oxide	200636-86-8	C[N+](C)([O-])CCCNC(=O)C1(F)C(F)(F)C(F)(F)C(F)(C(F)(F)F)C(F)(F)C1(F)F	1
DTXSID101033140	2-({1-[1,2,2-Trifluoro-2-(2,2,2-trifluoroethoxy)ethoxy]perfluoropropan-2-yl}oxy)perfluoroethane-1-sulfinate sodium	187480-47-3	[Na+].[O-]S(=O)C(F)(F)C(F)(F)OC(F)(C(F)(F)F)C(F)(F)OC(F)C(F)(F)OCC(F)(F)F	1
DTXSID101033164	3-{(2-Carboxyethyl)[(undecafluoropentyl)sulfonyl]amino}-N-(carboxymethyl)-N,N-dimethylpropan-1-aminium	2089109-19-1	C[N+](C)(CCCN(CCC(O)=O)S(=O)(=O)C(F)(F)C(F)(F)C(F)(F)C(F)(F)C(F)(F)F)CC(O)=O	1
DTXSID101033271	Sodium perfluorododecanoate	60872-01-7	[Na+].[O-]C(=O)C(F)(F)C(F)(F)C(F)(F)C(F)(F)C(F)(F)C(F)(F)C(F)(F)C(F)(F)C(F)(F)C(F)(F)C(F)(F)F	1
DTXSID101033283	Bis(perfluorooctyl) phosphinic acid methyl ester	610800-37-8	COP(=O)(C(F)(F)C(F)(F)C(F)(F)C(F)(F)C(F)(F)C(F)(F)C(F)(F)C(F)(F)F)C(F)(F)C(F)(F)C(F)(F)C(F)(F)C(F)(F)C(F)(F)C(F)(F)C(F)(F)F	1
DTXSID101033338	N-Ethyl-N-[2-(phosphonooxy)ethyl]perfluorodecanesulfonamide	61481-05-8	CCN(CCOP(O)(O)=O)S(=O)(=O)C(F)(F)C(F)(F)C(F)(F)C(F)(F)C(F)(F)C(F)(F)C(F)(F)C(F)(F)C(F)(F)C(F)(F)F	1
DTXSID101033340	2-Carboxy-N,N-diethyl-N-[2-[[(perfluorooctyl)sulfonyl]amino]ethyl]ethanaminium inner salt	61481-08-1	CC[N+](CC)(CCNS(=O)(=O)C(F)(F)C(F)(F)C(F)(F)C(F)(F)C(F)(F)C(F)(F)C(F)(F)C(F)(F)F)CCC([O-])=O	1
DTXSID101033390	2,2,4,4,5,5,7,7,8,8,10,10,11,11,13,13,14,14,15,15,16,16,16‐Tricosafluoro‐3,6,9,12‐tetraoxahexadecan‐1‐ol	653573-80-9	OCC(F)(F)OC(F)(F)C(F)(F)OC(F)(F)C(F)(F)OC(F)(F)C(F)(F)OC(F)(F)C(F)(F)C(F)(F)C(F)(F)F	1
DTXSID101033495	4-[(Perfluorohexyl)oxy]benzenesulfonic acid sodium salt	69161-21-3	[Na+].[O-]S(=O)(=O)C1=CC=C(OC(F)(F)C(F)(F)C(F)(F)C(F)(F)C(F)(F)C(F)(F)F)C=C1	1
DTXSID101033502	3,4,4,5,5,6,6,6‐Octafluorohex‐2‐enoic acid	70887-90-0	OC(=O)C=C(F)C(F)(F)C(F)(F)C(F)(F)F	1
DTXSID101033538	Silver perfluorononanoate	7358-16-9	[Ag+].[O-]C(=O)C(F)(F)C(F)(F)C(F)(F)C(F)(F)C(F)(F)C(F)(F)C(F)(F)C(F)(F)F	1
DTXSID101033576	Sodium 2,5-bis(1,1,2,3,3,3-hexafluoropropoxy)benzenesulfonate	75860-16-1	[Na+].[O-]S(=O)(=O)C1=C(OC(F)(F)C(F)C(F)(F)F)C=CC(OC(F)(F)C(F)C(F)(F)F)=C1	1
DTXSID101033619	1‐(Carboxylatomethyl)‐1‐(2‐hydroxyethyl)‐4‐[3‐(perfluorodecanamido)propyl]piperazin‐1‐ium	77864-04-1	OCC[N+]1(CC([O-])=O)CCN(CCCNC(=O)C(F)(F)C(F)(F)C(F)(F)C(F)(F)C(F)(F)C(F)(F)C(F)(F)C(F)(F)C(F)(F)F)CC1	1
DTXSID101033621	Bis[perfluoro-2-[1-(methyl)ethoxy]ethyl]phosphinic acid ytterbium(3+) salt	500776-84-1	[Yb+3].[O-]P(=O)(C(F)(F)C(F)(F)OC(F)(C(F)(F)F)C(F)(F)F)C(F)(F)C(F)(F)OC(F)(C(F)(F)F)C(F)(F)F.[O-]P(=O)(C(F)(F)C(F)(F)OC(F)(C(F)(F)F)C(F)(F)F)C(F)(F)C(F)(F)OC(F)(C(F)(F)F)C(F)(F)F.[O-]P(=O)(C(F)(F)C(F)(F)OC(F)(C(F)(F)F)C(F)(F)F)C(F)(F)C(F)(F)OC(F)(C(F)(F)F)C(F)(F)F	1
DTXSID101033695	N-(Carboxylatomethyl)-3-[hexyl[(perfluorohexyl)sulfonyl]amino]-N,N-dimethyl-1-propanaminium	83409-36-3	CCCCCCN(CCC[N+](C)(C)CC([O-])=O)S(=O)(=O)C(F)(F)C(F)(F)C(F)(F)C(F)(F)C(F)(F)C(F)(F)F	1
DTXSID101033726	2-[3-[(Perfluoro-1-oxononyl)amino]propoxy]-N,N,N-trimethylethanaminium 4-methylbenzenesulfonate	85212-69-7	CC1=CC=C(C=C1)S([O-])(=O)=O.C[N+](C)(C)CCOCCCNC(=O)C(F)(F)C(F)(F)C(F)(F)C(F)(F)C(F)(F)C(F)(F)C(F)(F)C(F)(F)F	1
DTXSID101033821	Sodium 3-[ethyl[(perfluorobutyl)sulfonyl]amino]-2-hydroxy-1-propanesulfonate	864069-39-6	[Na+].CCN(CC(O)CS([O-])(=O)=O)S(=O)(=O)C(F)(F)C(F)(F)C(F)(F)C(F)(F)F	1
DTXSID101033871	Ammonium 2-hydroxy-3-[[(perfluorobutyl)sulfonyl](propyl)amino]propanesulfonate	864069-49-8	[NH4+].CCCN(CC(O)CS([O-])(=O)=O)S(=O)(=O)C(F)(F)C(F)(F)C(F)(F)C(F)(F)F	1
DTXSID101034031	Tris[4-[4,4,6,7,7,9,10,10,12,13,13,15,15,15-tetradecafluoro-6,9,12-tris(trifluoromethyl)-2,5,8,11,14-pentaoxapentadec-1-yl]phenyl]phosphine	88750-33-8	FC(F)(F)OC(F)(F)C(F)(OC(F)(F)C(F)(OC(F)(F)C(F)(OC(F)(F)COCC1=CC=C(C=C1)P(C1=CC=C(COCC(F)(F)OC(F)(C(F)(F)F)C(F)(F)OC(F)(C(F)(F)F)C(F)(F)OC(F)(C(F)(F)F)C(F)(F)OC(F)(F)F)C=C1)C1=CC=C(COCC(F)(F)OC(F)(C(F)(F)F)C(F)(F)OC(F)(C(F)(F)F)C(F)(F)OC(F)(C(F)(F)F)C(F)(F)OC(F)(F)F)C=C1)C(F)(F)F)C(F)(F)F)C(F)(F)F	1
DTXSID101034043	N-[2-(2-Hydroxyethoxy)ethyl]-N-methyl-perfluoropropanesulfonamide	89148-26-5	CN(CCOCCO)S(=O)(=O)C(F)(F)C(F)(F)C(F)(F)F	1
DTXSID101034067	N-[[3-[[(Perfluorooctyl)sulfonyl](propyl)amino]propyl]sulfonyl]-2-hydroxy-N,N-dimethylethanaminium chloride	90179-38-7	[Cl-].CCCN(CCCS(=O)(=O)[N+](C)(C)CCO)S(=O)(=O)C(F)(F)C(F)(F)C(F)(F)C(F)(F)C(F)(F)C(F)(F)C(F)(F)C(F)(F)F	1
DTXSID101034148	2-[2-[Difluoro(trifluoromethoxy)methoxy]-1,1,2,2-tetrafluoroethoxy]-2-fluoroacetic acid	919005-07-5	OC(=O)C(F)OC(F)(F)C(F)(F)OC(F)(F)OC(F)(F)F	1
DTXSID101034162	2,2,3,5,5,6,6,8,8,10,10,12,12,14,14,14-Hexadecafluoro-4,7,9,11,13-pentaoxatetradecanoic acid	919005-17-7	OC(=O)C(F)(F)C(F)OC(F)(F)C(F)(F)OC(F)(F)OC(F)(F)OC(F)(F)OC(F)(F)F	1
DTXSID101034186	4-[2-[Difluoro(trifluoromethoxy)methoxy]-1,1,2,2-tetrafluoroethoxy]-2,2,3,4,4-pentafluorobutanoic acid	919005-28-0	OC(=O)C(F)(F)C(F)C(F)(F)OC(F)(F)C(F)(F)OC(F)(F)OC(F)(F)F	1
DTXSID101034217	2-[1,1,2-Trifluoro-2-[1,1,2,2,3,3-hexafluoro-3-(1,1,2,2,3,3,3-heptafluoropropoxy)propoxy]ethoxy]acetic acid	919005-36-0	OC(=O)COC(F)(F)C(F)OC(F)(F)C(F)(F)C(F)(F)OC(F)(F)C(F)(F)C(F)(F)F	1
DTXSID101034229	2-[Perfluoro-[3-(methoxy)propoxy]ethoxy]acetic acid	919005-41-7	OC(=O)COC(F)(F)C(F)(F)OC(F)(F)C(F)(F)C(F)(F)OC(F)(F)F	1
DTXSID101034243	Perfluoro-6-(ethoxy)hexanoic acid	919005-55-3	OC(=O)C(F)(F)C(F)(F)C(F)(F)C(F)(F)C(F)(F)OC(F)(F)C(F)(F)F	1
DTXSID101034255	N-(Carboxylatomethyl)-N,N-dimethyl-4-[[perfluoro-2-[1-(methyl)ethyl]-1,3-dimethyl-1-buten-1-yl]oxy]benzenaminium	927408-19-3	C[N+](C)(CC([O-])=O)C1=CC=C(OC(=C(C(F)(C(F)(F)F)C(F)(F)F)C(F)(C(F)(F)F)C(F)(F)F)C(F)(F)F)C=C1	1
DTXSID101034324	N-Propyl-perfluorotridecanesulfonamide hydrochloride	94817-83-1	Cl.CCCNS(=O)(=O)C(F)(F)C(F)(F)C(F)(F)C(F)(F)C(F)(F)C(F)(F)C(F)(F)C(F)(F)C(F)(F)C(F)(F)C(F)(F)C(F)(F)C(F)(F)F	1
DTXSID101034479	1-Hydroxy-2:2 fluorotelomer sulfonate	NOCAS_1034479	OC(CC(F)(F)C(F)(F)F)S([O-])(=O)=O	1
DTXSID101034481	Ammonium 2:2 fluorotelomer-1-sulfonate	945953-14-0	[NH4+].[O-]S(=O)(=O)CCC(F)(F)C(F)(F)F	1
DTXSID101034562	2-Hydroxy-N,N-dimethyl-N-{3-[(perfluoroundecanesulfonyl)amino]propyl}-3-sulfopropan-1-aminium	NOCAS_1034562	CN(CCCNS(=O)(=O)C(F)(F)C(F)(F)C(F)(F)C(F)(F)C(F)(F)C(F)(F)C(F)(F)C(F)(F)C(F)(F)C(F)(F)C(F)(F)F)CC(O)CS(O)(=O)=O	1
DTXSID101034574	12:2 Fluorotelomer dimethyl ethyl betaine	NOCAS_1034574	CC[N+](C)(C)CCC(F)(F)C(F)(F)C(F)(F)C(F)(F)C(F)(F)C(F)(F)C(F)(F)C(F)(F)C(F)(F)C(F)(F)C(F)(F)C(F)(F)F	1
DTXSID101034598	1-Hydroxy-9:2 fluorotelomer sulfonic acid	NOCAS_1034598	OC(CC(F)(F)C(F)(F)C(F)(F)C(F)(F)C(F)(F)C(F)(F)C(F)(F)C(F)(F)C(F)(F)F)S(O)(=O)=O	1
DTXSID101034617	14:2 Fluorotelomer carboxylic acid	NOCAS_1034617	OC(=O)CC(F)(F)C(F)(F)C(F)(F)C(F)(F)C(F)(F)C(F)(F)C(F)(F)C(F)(F)C(F)(F)C(F)(F)C(F)(F)C(F)(F)C(F)(F)C(F)(F)F	1
DTXSID101034629	7:2 Fluorotelomer ketone sulfonate	NOCAS_1034629	OS(=O)(=O)CC(=O)CC(F)(F)C(F)(F)C(F)(F)C(F)(F)C(F)(F)C(F)(F)C(F)(F)F	1
DTXSID101034667	12:2 Fluorotelomer sulfate	NOCAS_1034667	OS(=O)(=O)OCCC(F)(F)C(F)(F)C(F)(F)C(F)(F)C(F)(F)C(F)(F)C(F)(F)C(F)(F)C(F)(F)C(F)(F)C(F)(F)C(F)(F)F	1
DTXSID101034693	4-(Dimethylamino)-2-{[(perfluorohexyl)sulfonyl]amino}butanoic acid	2089109-98-6	CN(C)CCC(NS(=O)(=O)C(F)(F)C(F)(F)C(F)(F)C(F)(F)C(F)(F)C(F)(F)F)C(O)=O	1
DTXSID101034700	12:2 Fluorotelomer sulfonamido propyl methyl amino acetic acid	NOCAS_1034700	CN(CCCNS(=O)(=O)CCC(F)(F)C(F)(F)C(F)(F)C(F)(F)C(F)(F)C(F)(F)C(F)(F)C(F)(F)C(F)(F)C(F)(F)C(F)(F)C(F)(F)F)CC(O)=O	1
DTXSID101034712	14:2 Fluorotelomer sulfonamido propyl methyl amine	NOCAS_1034712	CNCCCNS(=O)(=O)CCC(F)(F)C(F)(F)C(F)(F)C(F)(F)C(F)(F)C(F)(F)C(F)(F)C(F)(F)C(F)(F)C(F)(F)C(F)(F)C(F)(F)C(F)(F)C(F)(F)F	1
DTXSID101034724	6:2 Fluorotelomer sulfonamido propyl amine	NOCAS_1034724	NCCCNS(=O)(=O)CCC(F)(F)C(F)(F)C(F)(F)C(F)(F)C(F)(F)C(F)(F)F	1
DTXSID101034736	14:2 Fluorotelomer sulfonamido propyl amine	NOCAS_1034736	NCCCNS(=O)(=O)CCC(F)(F)C(F)(F)C(F)(F)C(F)(F)C(F)(F)C(F)(F)C(F)(F)C(F)(F)C(F)(F)C(F)(F)C(F)(F)C(F)(F)C(F)(F)C(F)(F)F	1
DTXSID101034750	N-[3-(Dimethylamino)propyl]-perfluorodecane-1-sulfonamide	NOCAS_1034750	CN(C)CCCNS(=O)(=O)C(F)(F)C(F)(F)C(F)(F)C(F)(F)C(F)(F)C(F)(F)C(F)(F)C(F)(F)C(F)(F)C(F)(F)F	1
DTXSID101034762	3-{[3-(Dimethylamino)propyl][(perfluorononyl)sulfonyl]amino}propanoic acid	NOCAS_1034762	CN(C)CCCN(CCC(O)=O)S(=O)(=O)C(F)(F)C(F)(F)C(F)(F)C(F)(F)C(F)(F)C(F)(F)C(F)(F)C(F)(F)C(F)(F)F	1
DTXSID101034786	N-Methyl perfluoro-1-propane sulfonamide	NOCAS_1034786	CNS(=O)(=O)C(F)(F)C(F)(F)C(F)(F)F	1
DTXSID101034798	N,N-Dimethyl-3-[(pentafluoroethanesulfonyl)amino]propan-1-amine N-oxide	NOCAS_1034798	C[N+](C)([O-])CCCNS(=O)(=O)C(F)(F)C(F)(F)F	1
DTXSID101034805	(Perfluoropropanamido)-3-betaine	NOCAS_1034805	C[N+](C)(CCCNC(=O)C(F)(F)C(F)(F)F)CC([O-])=O	1
DTXSID101034817	Perfluorodecane-1-sulfinic acid	NOCAS_1034817	OS(=O)C(F)(F)C(F)(F)C(F)(F)C(F)(F)C(F)(F)C(F)(F)C(F)(F)C(F)(F)C(F)(F)C(F)(F)F	1
DTXSID101034829	Perfluoroundecyl hydrogen sulfate	NOCAS_1034829	OS(=O)(=O)OC(F)(F)C(F)(F)C(F)(F)C(F)(F)C(F)(F)C(F)(F)C(F)(F)C(F)(F)C(F)(F)C(F)(F)C(F)(F)F	1
DTXSID101034831	Perfluorononyl hydrogen sulfate	NOCAS_1034831	OS(=O)(=O)OC(F)(F)C(F)(F)C(F)(F)C(F)(F)C(F)(F)C(F)(F)C(F)(F)C(F)(F)C(F)(F)F	1
DTXSID101034843	Perfluoro-3-methylcyclopentane-1-sulfonic acid	NOCAS_1034843	OS(=O)(=O)C1(F)C(F)(F)C(F)(F)C(F)(C(F)(F)F)C1(F)F	1
DTXSID101034855	3-[Dimethyl(3-{[(perfluorododecyl)sulfonyl]amino}propyl)ammonio]propanoate	NOCAS_1034855	C[N+](C)(CCCNS(=O)(=O)C(F)(F)C(F)(F)C(F)(F)C(F)(F)C(F)(F)C(F)(F)C(F)(F)C(F)(F)C(F)(F)C(F)(F)C(F)(F)C(F)(F)F)CCC([O-])=O	1
DTXSID101034867	3-[(3-{(2-Carboxyethyl)[(perfluorononyl)sulfonyl]amino}propyl)(dimethyl)ammonio]propanoate	NOCAS_1034867	C[N+](C)(CCCN(CCC(O)=O)S(=O)(=O)C(F)(F)C(F)(F)C(F)(F)C(F)(F)C(F)(F)C(F)(F)C(F)(F)C(F)(F)C(F)(F)F)CCC([O-])=O	1
DTXSID101034893	Perfluoro-4-butylcyclopentane-1-carboxylic acid	NOCAS_1034893	OC(=O)C1(F)C(F)(F)C(F)(F)C(F)(C(F)(F)C(F)(F)C(F)(F)C(F)(F)F)C1(F)F	1
DTXSID101034900	Perfluoro-5-hexylcyclohexane-1-carboxylic acid	NOCAS_1034900	OC(=O)C1(F)C(F)(F)C(F)(F)C(F)(F)C(F)(C(F)(F)C(F)(F)C(F)(F)C(F)(F)C(F)(F)C(F)(F)F)C1(F)F	1
DTXSID101034912	2-Hydroxy-N,N-dimethyl-N-{3-[(pentafluoroethanesulfonyl)amino]propyl}-3-sulfopropan-1-aminium	NOCAS_1034912	C[N+](C)(CCCNS(=O)(=O)C(F)(F)C(F)(F)F)CC(O)CS([O-])(=O)=O	1
DTXSID101034924	2-Hydroxy-N,N-dimethyl-3-sulfo-N-[3-[[(perfluorooctyl)sulfonyl]amino]propyl]-1-propanaminium	NOCAS_1034924	C[N+](C)(CCCNS(=O)(=O)C(F)(F)C(F)(F)C(F)(F)C(F)(F)C(F)(F)C(F)(F)C(F)(F)C(F)(F)F)CC(O)CS(O)(=O)=O	1
DTXSID101034936	2-Hydroxy-N-(3-{(2-hydroxy-3-sulfopropyl)[(perfluoroheptyl)sulfonyl]amino}propyl)-N,N-dimethyl-3-sulfo-1-propanaminium	NOCAS_1034936	C[N+](C)(CCCN(CC(O)CS(O)(=O)=O)S(=O)(=O)C(F)(F)C(F)(F)C(F)(F)C(F)(F)C(F)(F)C(F)(F)C(F)(F)F)CC(O)CS(O)(=O)=O	1
DTXSID101034948	2-Hydroxy-N-(3-{(2-hydroxy-3-sulfopropyl)[(perfluoroundecyl)sulfonyl]amino}propyl)-N,N-dimethyl-3-sulfo-1-propanaminium	NOCAS_1034948	C[N+](C)(CCCN(CC(O)CS(O)(=O)=O)S(=O)(=O)C(F)(F)C(F)(F)C(F)(F)C(F)(F)C(F)(F)C(F)(F)C(F)(F)C(F)(F)C(F)(F)C(F)(F)C(F)(F)F)CC(O)CS(O)(=O)=O	1
DTXSID101034950	Perfluoro-5-(pentafluoroethyl)cyclohexanesulfonic acid	NOCAS_1034950	OS(=O)(=O)C1(F)C(F)(F)C(F)(F)C(F)(F)C(F)(C(F)(F)C(F)(F)F)C1(F)F	1
DTXSID101034962	Perfluoro-5-(tridecafluorohexyl)cyclohexanesulfonic acid	NOCAS_1034962	OS(=O)(=O)C1(F)C(F)(F)C(F)(F)C(F)(F)C(F)(C(F)(F)C(F)(F)C(F)(F)C(F)(F)C(F)(F)C(F)(F)F)C1(F)F	1
DTXSID101034974	N-(3-{(Carboxymethyl)[(perfluorodecyl)sulfonyl]amino}propyl)-2-hydroxy-N,N-dimethyl-3-sulfo-1-propanaminium	NOCAS_1034974	C[N+](C)(CCCN(CC(O)=O)S(=O)(=O)C(F)(F)C(F)(F)C(F)(F)C(F)(F)C(F)(F)C(F)(F)C(F)(F)C(F)(F)C(F)(F)C(F)(F)F)CC(O)CS(O)(=O)=O	1
DTXSID101034986	3-[(Perfluoroethanesulfonyl)amino]propane-1-sulfonic acid	NOCAS_1034986	OS(=O)(=O)CCCNS(=O)(=O)C(F)(F)C(F)(F)F	1
[truncated: 9,175 more rows]

## Sheet: S3.SMILES_InRule
DTXSID	Substance_Name	Substance_CASRN	SMILES	PFASSTRUCT_v4	OECD_2018	2021 PFOA Indicative List SORT	2021 PFOA Indicative List Status	Prepare-SMILES	QT-SMILES	7T-SMILES	In-Rule	36-Manual-override	C7F15-C linear	YES+branched		Label	SMILES Transformations	Counts
[truncated: 10,794 more rows]
[truncated: 1 more columns]

[truncated: 1 more sheets: S4.SMILES_OutRule]
